# Supplementary material for: Bioactive Triterpenoid Saponins From the Seeds of Aesculus chinensis Bge. var. chekiangensis
Source: Front Chem. 2020 Jan 23;7:908. doi: 10.3389/fchem.2019.00908 (PMC6989559; doi:10.3389/fchem.2019.00908)
Supplement: Supplementary file 1 [file Data_Sheet_1.ZIP › 2N2.cif]

data_2n2
_audit_creation_date               2019-09-26
_audit_creation_method
;
Olex2 1.3-alpha
(compiled 2019.09.11 svn.r3662 for OlexSys, GUI svn.r5938)
;
_shelx_SHELXL_version_number       '2018/3'
_audit_contact_author_address      ?
_audit_contact_author_email        ?
_audit_contact_author_name         ''
_audit_contact_author_phone        ?
_publ_contact_author_id_orcid      ?
_publ_section_references
;
Dolomanov, O.V., Bourhis, L.J., Gildea, R.J, Howard, J.A.K. & Puschmann, H.
 (2009), J. Appl. Cryst. 42, 339-341.

Sheldrick, G.M. (2008). Acta Cryst. A64, 112-122.

Sheldrick, G.M. (2015). Acta Cryst. C71, 3-8.
;
_chemical_name_common              ?
_chemical_name_systematic          ?
_chemical_formula_moiety           '2(C15 H25 O3)'
_chemical_formula_sum              'C30 H50 O6'
_chemical_formula_weight           506.70
_chemical_absolute_configuration   ad
_chemical_melting_point            ?
loop_
  _atom_type_symbol
  _atom_type_description
  _atom_type_scat_dispersion_real
  _atom_type_scat_dispersion_imag
  _atom_type_scat_source
 'C' 'C' 0.0181 0.0091 'International Tables Vol C Tables 4.2.6.8 and 6.1.1.4'
 'H' 'H' 0.0000 0.0000 'International Tables Vol C Tables 4.2.6.8 and 6.1.1.4'
 'O' 'O' 0.0492 0.0322 'International Tables Vol C Tables 4.2.6.8 and 6.1.1.4'

_shelx_space_group_comment
;
The symmetry employed for this shelxl refinement is uniquely defined
by the following loop, which should always be used as a source of
symmetry information in preference to the above space-group names.
They are only intended as comments.
;
_space_group_crystal_system        'orthorhombic'
_space_group_IT_number             18
_space_group_name_H-M_alt          'P 21 21 2'
_space_group_name_Hall             'P 2 2ab'
loop_
  _space_group_symop_operation_xyz
 'x, y, z'
 '-x, -y, z'
 '-x+1/2, y+1/2, -z'
 'x+1/2, -y+1/2, -z'

_cell_length_a                     11.7057(7)
_cell_length_b                     34.214(3)
_cell_length_c                     14.7361(9)
_cell_angle_alpha                  90
_cell_angle_beta                   90
_cell_angle_gamma                  90
_cell_volume                       5901.7(7)
_cell_formula_units_Z              8
_cell_measurement_reflns_used      3445
_cell_measurement_temperature      100.00(11)
_cell_measurement_theta_max        72.0800
_cell_measurement_theta_min        2.9630
_shelx_estimated_absorpt_T_max     0.947
_shelx_estimated_absorpt_T_min     0.924
_exptl_absorpt_coefficient_mu      0.617
_exptl_absorpt_correction_T_max    1.00000
_exptl_absorpt_correction_T_min    0.72554
_exptl_absorpt_correction_type     multi-scan
_exptl_absorpt_process_details
;
CrysAlisPro 1.171.38.43f (Rigaku Oxford Diffraction, 2015)
Empirical absorption correction using spherical harmonics,
 implemented in SCALE3 ABSPACK scaling algorithm.
;
_exptl_absorpt_special_details     ?
_exptl_crystal_colour              colourless
_exptl_crystal_colour_primary      colourless
_exptl_crystal_density_diffrn      1.141
_exptl_crystal_density_meas        ?
_exptl_crystal_density_method      ?
_exptl_crystal_description         block
_exptl_crystal_F_000               2224
_exptl_crystal_size_max            0.13
_exptl_crystal_size_mid            0.11
_exptl_crystal_size_min            0.09
_exptl_transmission_factor_max     ?
_exptl_transmission_factor_min     ?
_diffrn_reflns_av_R_equivalents    0.0506
_diffrn_reflns_av_unetI/netI       0.0834
_diffrn_reflns_Laue_measured_fraction_full  0.999
_diffrn_reflns_Laue_measured_fraction_max  0.962
_diffrn_reflns_limit_h_max         7
_diffrn_reflns_limit_h_min         -14
_diffrn_reflns_limit_k_max         40
_diffrn_reflns_limit_k_min         -41
_diffrn_reflns_limit_l_max         17
_diffrn_reflns_limit_l_min         -11
_diffrn_reflns_number              20468
_diffrn_reflns_point_group_measured_fraction_full  0.938
_diffrn_reflns_point_group_measured_fraction_max  0.887
_diffrn_reflns_theta_full          67.684
_diffrn_reflns_theta_max           74.497
_diffrn_reflns_theta_min           2.583
_diffrn_ambient_environment        N~2~
_diffrn_ambient_temperature        100.00(11)
_diffrn_detector                   'CCD plate'
_diffrn_detector_area_resol_mean   5.2684
_diffrn_detector_type              AtlasS2
_diffrn_measured_fraction_theta_full  0.999
_diffrn_measured_fraction_theta_max  0.962
_diffrn_measurement_details
;
List of Runs (angles in degrees, time in seconds):

  # Type    Start    End  Width  t~exp~   \w     \q     \k     \f   Frames
--------------------------------------------------------------------------
  1  \w     54.00  85.00   1.00    3.00    --   40.98  37.00-120.00   31
  2  \w     79.00 177.00   1.00    5.00    --  106.95  30.00-180.00   98
  3  \w    138.00 165.00   1.00    5.00    --  106.95 125.00-180.00   27
  4  \w     98.00 125.00   1.00    5.00    --  106.95 125.00-180.00   27
  5  \w     37.00 130.00   1.00    5.00    --  106.95 -45.00-180.00   93
  6  \w     42.00 109.00   1.00    5.00    --  106.95 -94.00 -30.00   67
  7  \w    -98.00 -55.00   1.00    6.00    --  -40.98 137.00 163.00   43
  8  \w   -106.00 -20.00   1.00    6.00    --  -40.98 -57.00  90.00   86
  9  \w    -42.00 -17.00   1.00    6.00    --  -41.23 -37.00   0.00   25
 10  \w   -107.00 -81.00   1.00    5.25    --  -41.23-143.00-165.00   26
 11  \w    -98.00 -72.00   1.00    5.25    --  -41.23-138.00 101.00   26
 12  \w      3.00  49.00   1.00    5.25    --   41.23 -99.00 -90.00   46
 13  \w    129.00 166.00   1.00    5.00    --  106.95 125.00 -30.00   37
;
_diffrn_measurement_device         'four-circle diffractometer'
_diffrn_measurement_device_type    'SuperNova, Dual, Cu at zero, AtlasS2'
_diffrn_measurement_method         '\w scans'
_diffrn_orient_matrix_type        
 'CrysAlisPro convention (1999,Acta A55,543-557)'
_diffrn_orient_matrix_UB_11        -0.0868252000
_diffrn_orient_matrix_UB_12        -0.0336219000
_diffrn_orient_matrix_UB_13        0.0068800000
_diffrn_orient_matrix_UB_21        0.0988524000
_diffrn_orient_matrix_UB_22        -0.0297366000
_diffrn_orient_matrix_UB_23        0.0027475000
_diffrn_orient_matrix_UB_31        0.0034045000
_diffrn_orient_matrix_UB_32        0.0030757000
_diffrn_orient_matrix_UB_33        0.1042947000
_diffrn_radiation_monochromator    mirror
_diffrn_radiation_probe            x-ray
_diffrn_radiation_type             'Cu K\a'
_diffrn_radiation_wavelength       1.54184
_diffrn_source                     'micro-focus sealed X-ray tube'
_diffrn_source_type                'SuperNova (Cu) X-ray Source'
_reflns_Friedel_coverage           0.666
_reflns_Friedel_fraction_full      0.863
_reflns_Friedel_fraction_max       0.794
_reflns_number_gt                  7214
_reflns_number_total               10735
_reflns_odcompleteness_completeness  99.93
_reflns_odcompleteness_iscentric   1
_reflns_odcompleteness_theta       66.97
_reflns_special_details
;
 Reflections were merged by SHELXL according to the crystal
 class for the calculation of statistics and refinement.
 
 Structure factors included contributions from the .fab file.
 
 _reflns_Friedel_fraction is defined as the number of unique
 Friedel pairs measured divided by the number that would be
 possible theoretically, ignoring centric projections and
 systematic absences.
;
_reflns_threshold_expression       'I > 2\s(I)'
_computing_cell_refinement         'CrysAlisPro 1.171.38.43f (Rigaku OD, 2015)'
_computing_data_collection         'CrysAlisPro 1.171.38.43f (Rigaku OD, 2015)'
_computing_data_reduction          'CrysAlisPro 1.171.38.43f (Rigaku OD, 2015)'
_computing_molecular_graphics      'Olex2 1.3-alpha (Dolomanov et al., 2009)'
_computing_publication_material    'Olex2 1.3-alpha (Dolomanov et al., 2009)'
_computing_structure_refinement    'ShelXL 2018/3 (Sheldrick, 2015)'
_computing_structure_solution      'ShelXS n/a (Sheldrick, 2008)'
_refine_diff_density_max           0.558
_refine_diff_density_min           -0.369
_refine_diff_density_rms           0.069
_refine_ls_abs_structure_details
;
 Flack x determined using 1984 quotients [(I+)-(I-)]/[(I+)+(I-)]
 (Parsons, Flack and Wagner, Acta Cryst. B69 (2013) 249-259).
;
_refine_ls_abs_structure_Flack     0.27(14)
_refine_ls_extinction_coef         .
_refine_ls_extinction_method       none
_refine_ls_goodness_of_fit_ref     1.025
_refine_ls_hydrogen_treatment      constr
_refine_ls_matrix_type             full
_refine_ls_number_parameters       671
_refine_ls_number_reflns           10735
_refine_ls_number_restraints       0
_refine_ls_R_factor_all            0.1161
_refine_ls_R_factor_gt             0.0837
_refine_ls_restrained_S_all        1.025
_refine_ls_shift/su_max            0.003
_refine_ls_shift/su_mean           0.000
_refine_ls_structure_factor_coef   Fsqd
_refine_ls_weighting_details      
 'w=1/[\s^2^(Fo^2^)+(0.1249P)^2^+2.6985P] where P=(Fo^2^+2Fc^2^)/3'
_refine_ls_weighting_scheme        calc
_refine_ls_wR_factor_gt            0.2163
_refine_ls_wR_factor_ref           0.2452
_refine_special_details            ?
_olex2_refinement_description
;
1. Fixed Uiso
 At 1.2 times of:
  All C(H) groups, All C(H,H) groups
 At 1.5 times of:
  All C(H,H,H) groups, All O(H) groups
2.a Ternary CH refined with riding coordinates:
 C9(H9), C17B(H17B), C5(H5A), C21B(H21B), C18(H18), C5B(H5BA), C1B(H1BA),
 C13B(H13B), C22(H22), C7B(H7B), C2B(H2BA), C3(H3A), C21(H21), C16(H16)
2.b Secondary CH2 refined with riding coordinates:
 C12B(H12A,H12B), C7(H7A,H7C), C15B(H15A,H15B), C4B(H4BA,H4BB), C6(H6A,H6C),
 C1(H1A,H1C), C15(H15C,H15D), C8B(H8BA,H8BB), C16B(H16A,H16B), C20B(H20A,H20B),
 C19B(H19A,H19B), C28(H28D,H28E), C19(H19C,H19D), C2(H2A,H2C), C11(H11A,H11C),
 C29B(H29A,H29B), C26B(H26A,H26B), C24(H24D,H24E)
2.c Aromatic/amide H refined with riding coordinates:
 C11B(H11B), C12(H12)
2.d Tetrahedral OH refined with riding coordinates:
 O5(H5), O3(H3)
2.e Idealised Me refined as rotating group:
 C26(H26C,H26D,H26E), C28B(H28A,H28B,H28C), C27B(H27A,H27B,H27C), C01L(H01A,
 H01B,H01C), C23(H23D,H23E,H23F), C27(H27D,H27E,H27F), C25(H25D,H25E,H25F),
 C23B(H23A,H23B,H23C), C25B(H25A,H25B,H25C), C24B(H24A,H24B,H24C), C30(H30A,
 H30B,H30C), C29(H29C,H29D,H29E)
2.f Idealised tetrahedral OH refined as rotating group:
 O1B(H1B), O5B(H5B), O2B(H2B), O4B(H4B), O1(H1), O4(H4), O6(H6), O3B(H3B),
 O2(H2), O6B(H6B)
;
_atom_sites_solution_hydrogens     geom
_atom_sites_solution_primary       direct
_atom_sites_solution_secondary     ?
loop_
  _atom_site_label
  _atom_site_type_symbol
  _atom_site_fract_x
  _atom_site_fract_y
  _atom_site_fract_z
  _atom_site_U_iso_or_equiv
  _atom_site_adp_type
  _atom_site_occupancy
  _atom_site_site_symmetry_order
  _atom_site_calc_flag
  _atom_site_refinement_flags_posn
  _atom_site_refinement_flags_adp
  _atom_site_refinement_flags_occupancy
  _atom_site_disorder_assembly
  _atom_site_disorder_group
 O1B O 0.5103(4) 0.04231(15) 0.1504(3) 0.0449(12) Uani 1 1 d . . . . .
 H1B H 0.461561 0.025193 0.154288 0.067 Uiso 1 1 calc R U . . .
 O5B O 0.5143(5) 0.40423(14) 0.4613(3) 0.0492(13) Uani 1 1 d . . . . .
 H5B H 0.545752 0.409505 0.509456 0.074 Uiso 1 1 calc R U . . .
 O2B O 0.6904(4) 0.00430(14) 0.2376(4) 0.0472(13) Uani 1 1 d . . . . .
 H2B H 0.753645 0.000400 0.215395 0.071 Uiso 1 1 calc R U . . .
 O4B O 0.6282(5) 0.12309(15) 0.1451(3) 0.0485(13) Uani 1 1 d . . . . .
 H4B H 0.629363 0.111105 0.096905 0.073 Uiso 1 1 calc R U . . .
 O1 O 0.0352(5) 0.92077(14) 0.1147(4) 0.0466(12) Uani 1 1 d . . . . .
 H1 H 0.096618 0.931854 0.107465 0.070 Uiso 1 1 calc R U . . .
 O4 O -0.0996(5) 0.58296(17) 0.0203(3) 0.0531(14) Uani 1 1 d . . . . .
 H4 H -0.041655 0.569819 0.013362 0.080 Uiso 1 1 calc R U . . .
 O6 O 0.1138(5) 0.50997(14) 0.2812(4) 0.0537(14) Uani 1 1 d . . . . .
 H6 H 0.176649 0.501188 0.294843 0.081 Uiso 1 1 calc R U . . .
 O5 O 0.0567(5) 0.53443(15) 0.1039(4) 0.0554(14) Uani 1 1 d . . . . .
 H5 H 0.017148 0.542462 0.061934 0.083 Uiso 1 1 calc R U . . .
 O3B O 0.3462(5) 0.06252(17) 0.3460(4) 0.0562(14) Uani 1 1 d . . . . .
 H3B H 0.313474 0.044448 0.320271 0.084 Uiso 1 1 calc R U . . .
 O3 O 0.2292(5) 0.60792(17) 0.1336(5) 0.0664(17) Uani 1 1 d . . . . .
 H3 H 0.279566 0.604937 0.095546 0.100 Uiso 1 1 calc R U . . .
 O2 O -0.0642(6) 0.90452(19) -0.0445(4) 0.0716(18) Uani 1 1 d . . . . .
 H2 H -0.047393 0.919569 -0.003274 0.107 Uiso 1 1 calc R U . . .
 C10B C 0.5395(5) 0.15456(19) 0.3671(4) 0.0305(14) Uani 1 1 d . . . . .
 C9 C 0.0106(5) 0.75560(19) 0.1717(4) 0.0301(14) Uani 1 1 d . . . . .
 H9 H 0.088200 0.759417 0.195084 0.036 Uiso 1 1 calc R U . . .
 C13 C 0.0146(5) 0.6709(2) 0.2128(4) 0.0330(14) Uani 1 1 d . . . . .
 C17B C 0.4676(6) 0.3060(2) 0.3504(4) 0.0333(14) Uani 1 1 d . . . . .
 H17B H 0.545740 0.303334 0.327427 0.040 Uiso 1 1 calc R U . . .
 C5 C 0.0555(5) 0.81144(19) 0.0698(4) 0.0310(14) Uani 1 1 d . . . . .
 H5A H 0.130999 0.808662 0.097857 0.037 Uiso 1 1 calc R U . . .
 O6B O 0.3109(6) 0.4036(2) 0.3912(6) 0.083(2) Uani 1 1 d . . . . .
 H6B H 0.373033 0.414672 0.393674 0.124 Uiso 1 1 calc R U . . .
 C22B C 0.4528(6) 0.35098(19) 0.3648(4) 0.0360(15) Uani 1 1 d . . . . .
 C14B C 0.4528(6) 0.21933(18) 0.3209(4) 0.0306(14) Uani 1 1 d . . . . .
 C8 C 0.0243(6) 0.72481(19) 0.0950(4) 0.0333(15) Uani 1 1 d . . . . .
 C11B C 0.5372(6) 0.16761(19) 0.4519(4) 0.0331(15) Uani 1 1 d . . . . .
 H11B H 0.545876 0.148928 0.497256 0.040 Uiso 1 1 calc R U . . .
 C12B C 0.5223(6) 0.20860(19) 0.4827(4) 0.0364(15) Uani 1 1 d . . . . .
 H12A H 0.587071 0.215764 0.520273 0.044 Uiso 1 1 calc R U . . .
 H12B H 0.454305 0.210145 0.520158 0.044 Uiso 1 1 calc R U . . .
 C21B C 0.5355(6) 0.36423(19) 0.4388(5) 0.0369(15) Uani 1 1 d . . . . .
 H21B H 0.612967 0.362612 0.413800 0.044 Uiso 1 1 calc R U . . .
 C18 C 0.0188(6) 0.6282(2) 0.2371(4) 0.0366(15) Uani 1 1 d . . . . .
 H18 H -0.054554 0.622397 0.266265 0.044 Uiso 1 1 calc R U . . .
 C5B C 0.5620(5) 0.11163(19) 0.3484(5) 0.0330(14) Uani 1 1 d . . . . .
 H5BA H 0.528957 0.097348 0.399719 0.040 Uiso 1 1 calc R U . . .
 C17 C 0.0248(6) 0.6014(2) 0.1537(5) 0.0389(16) Uani 1 1 d . . . . .
 C18B C 0.4653(6) 0.27953(19) 0.4356(4) 0.0300(14) Uani 1 1 d . . . . .
 C1B C 0.5468(6) 0.0534(2) 0.2392(4) 0.0372(15) Uani 1 1 d . . . . .
 H1BA H 0.508392 0.035544 0.281392 0.045 Uiso 1 1 calc R U . . .
 C7 C 0.0961(6) 0.7428(2) 0.0183(5) 0.0389(16) Uani 1 1 d . . . . .
 H7A H 0.175098 0.744172 0.037895 0.047 Uiso 1 1 calc R U . . .
 H7C H 0.092931 0.725612 -0.034022 0.047 Uiso 1 1 calc R U . . .
 C15B C 0.4404(6) 0.25015(19) 0.2438(5) 0.0353(15) Uani 1 1 d . . . . .
 H15A H 0.514821 0.254353 0.216531 0.042 Uiso 1 1 calc R U . . .
 H15B H 0.390584 0.239597 0.197290 0.042 Uiso 1 1 calc R U . . .
 C6B C 0.5019(5) 0.09532(19) 0.2621(5) 0.0351(15) Uani 1 1 d . . . . .
 C9B C 0.5300(6) 0.18388(19) 0.2884(4) 0.0327(14) Uani 1 1 d . . . . .
 C4B C 0.6915(5) 0.10270(19) 0.3503(5) 0.0353(15) Uani 1 1 d . . . . .
 H4BA H 0.728371 0.116873 0.301387 0.042 Uiso 1 1 calc R U . . .
 H4BB H 0.723102 0.112177 0.407059 0.042 Uiso 1 1 calc R U . . .
 C6 C 0.0580(7) 0.7832(2) -0.0105(4) 0.0400(17) Uani 1 1 d . . . . .
 H6A H -0.017720 0.781612 -0.037001 0.048 Uiso 1 1 calc R U . . .
 H6C H 0.109711 0.793136 -0.056406 0.048 Uiso 1 1 calc R U . . .
 C13B C 0.5116(6) 0.23857(18) 0.4044(4) 0.0312(14) Uani 1 1 d . . . . .
 H13B H 0.590307 0.243493 0.384820 0.037 Uiso 1 1 calc R U . . .
 C1 C -0.0177(6) 0.8240(2) 0.2276(5) 0.0396(16) Uani 1 1 d . . . . .
 H1A H -0.076136 0.817093 0.271489 0.048 Uiso 1 1 calc R U . . .
 H1C H 0.056132 0.819624 0.255826 0.048 Uiso 1 1 calc R U . . .
 C3B C 0.7191(6) 0.0594(2) 0.3408(5) 0.0372(15) Uani 1 1 d . . . . .
 C15 C 0.1091(7) 0.6570(2) 0.0606(4) 0.0380(16) Uani 1 1 d . . . . .
 H15C H 0.046817 0.658926 0.017354 0.046 Uiso 1 1 calc R U . . .
 H15D H 0.178431 0.664333 0.028759 0.046 Uiso 1 1 calc R U . . .
 C10 C -0.0290(6) 0.7969(2) 0.1437(4) 0.0328(14) Uani 1 1 d . . . . .
 C8B C 0.4787(7) 0.16490(19) 0.2035(4) 0.0381(16) Uani 1 1 d . . . . .
 H8BA H 0.497308 0.181338 0.151897 0.046 Uiso 1 1 calc R U . . .
 H8BB H 0.396261 0.165107 0.209872 0.046 Uiso 1 1 calc R U . . .
 C12 C -0.0479(6) 0.6954(2) 0.2643(5) 0.0415(17) Uani 1 1 d . . . . .
 H12 H -0.089474 0.684238 0.311437 0.050 Uiso 1 1 calc R U . . .
 C16B C 0.3933(7) 0.2892(2) 0.2743(5) 0.0426(17) Uani 1 1 d . . . . .
 H16A H 0.315566 0.285946 0.295886 0.051 Uiso 1 1 calc R U . . .
 H16B H 0.392008 0.307230 0.223505 0.051 Uiso 1 1 calc R U . . .
 C14 C 0.0879(5) 0.68781(19) 0.1361(4) 0.0332(15) Uani 1 1 d . . . . .
 C20B C 0.5327(7) 0.3393(2) 0.5253(4) 0.0419(17) Uani 1 1 d . . . . .
 H20A H 0.591267 0.348485 0.566719 0.050 Uiso 1 1 calc R U . . .
 H20B H 0.459233 0.342582 0.554817 0.050 Uiso 1 1 calc R U . . .
 C26 C -0.0928(7) 0.7127(2) 0.0566(5) 0.0457(18) Uani 1 1 d . . . . .
 H26C H -0.121089 0.733006 0.017598 0.069 Uiso 1 1 calc R U . . .
 H26D H -0.145440 0.708662 0.105623 0.069 Uiso 1 1 calc R U . . .
 H26E H -0.084807 0.688951 0.022537 0.069 Uiso 1 1 calc R U . . .
 C22 C 0.0381(6) 0.5589(2) 0.1840(4) 0.0377(15) Uani 1 1 d . . . . .
 H22 H -0.035825 0.551017 0.209338 0.045 Uiso 1 1 calc R U . . .
 C7B C 0.5153(6) 0.1230(2) 0.1805(4) 0.0371(15) Uani 1 1 d . . . . .
 H7B H 0.464539 0.113550 0.132465 0.045 Uiso 1 1 calc R U . . .
 C4 C 0.0481(6) 0.8555(2) 0.0439(5) 0.0372(15) Uani 1 1 d . . . . .
 C19B C 0.5520(6) 0.2963(2) 0.5054(5) 0.0392(16) Uani 1 1 d . . . . .
 H19A H 0.545865 0.281610 0.561510 0.047 Uiso 1 1 calc R U . . .
 H19B H 0.628826 0.292763 0.482132 0.047 Uiso 1 1 calc R U . . .
 C28B C 0.3321(6) 0.2049(2) 0.3468(5) 0.0405(16) Uani 1 1 d . . . . .
 H28A H 0.286177 0.226760 0.365166 0.061 Uiso 1 1 calc R U . . .
 H28B H 0.337723 0.186617 0.396056 0.061 Uiso 1 1 calc R U . . .
 H28C H 0.297535 0.192366 0.295457 0.061 Uiso 1 1 calc R U . . .
 C2B C 0.6736(6) 0.0463(2) 0.2506(5) 0.0415(16) Uani 1 1 d . . . . .
 H2BA H 0.714496 0.060334 0.202572 0.050 Uiso 1 1 calc R U . . .
 C27B C 0.6529(6) 0.1965(2) 0.2640(5) 0.0417(17) Uani 1 1 d . . . . .
 H27A H 0.694190 0.174484 0.240408 0.062 Uiso 1 1 calc R U . . .
 H27B H 0.690704 0.206104 0.317350 0.062 Uiso 1 1 calc R U . . .
 H27C H 0.650326 0.216783 0.218994 0.062 Uiso 1 1 calc R U . . .
 C3 C 0.0546(6) 0.8798(2) 0.1312(5) 0.0381(16) Uani 1 1 d . . . . .
 H3A H 0.131830 0.876917 0.156053 0.046 Uiso 1 1 calc R U . . .
 C28 C -0.0915(6) 0.6047(2) 0.1045(5) 0.0418(17) Uani 1 1 d . . . . .
 H28D H -0.150971 0.595547 0.145173 0.050 Uiso 1 1 calc R U . . .
 H28E H -0.106372 0.632025 0.091807 0.050 Uiso 1 1 calc R U . . .
 C01L C 0.3463(6) 0.2777(2) 0.4827(5) 0.0444(18) Uani 1 1 d . . . . .
 H01A H 0.338223 0.299478 0.523166 0.067 Uiso 1 1 calc R U . . .
 H01B H 0.340161 0.253753 0.516471 0.067 Uiso 1 1 calc R U . . .
 H01C H 0.287272 0.278592 0.437563 0.067 Uiso 1 1 calc R U . . .
 C23 C 0.1536(7) 0.8654(2) -0.0150(5) 0.0446(18) Uani 1 1 d . . . . .
 H23D H 0.159069 0.893255 -0.022165 0.067 Uiso 1 1 calc R U . . .
 H23E H 0.145814 0.853385 -0.073525 0.067 Uiso 1 1 calc R U . . .
 H23F H 0.221362 0.855827 0.014133 0.067 Uiso 1 1 calc R U . . .
 C19 C 0.1117(7) 0.6187(2) 0.3093(5) 0.0420(17) Uani 1 1 d . . . . .
 H19C H 0.186167 0.624803 0.284151 0.050 Uiso 1 1 calc R U . . .
 H19D H 0.099976 0.635443 0.361639 0.050 Uiso 1 1 calc R U . . .
 C27 C 0.2058(6) 0.6973(2) 0.1782(5) 0.0395(16) Uani 1 1 d . . . . .
 H27D H 0.195468 0.713015 0.231562 0.059 Uiso 1 1 calc R U . . .
 H27E H 0.251214 0.711439 0.134902 0.059 Uiso 1 1 calc R U . . .
 H27F H 0.243929 0.673459 0.194131 0.059 Uiso 1 1 calc R U . . .
 C2 C -0.0292(6) 0.8671(2) 0.2036(5) 0.0416(17) Uani 1 1 d . . . . .
 H2A H -0.106353 0.872000 0.182393 0.050 Uiso 1 1 calc R U . . .
 H2C H -0.017040 0.882611 0.257744 0.050 Uiso 1 1 calc R U . . .
 C21 C 0.1252(7) 0.5502(2) 0.2551(5) 0.0441(17) Uani 1 1 d . . . . .
 H21 H 0.201605 0.554338 0.229560 0.053 Uiso 1 1 calc R U . . .
 C16 C 0.1201(7) 0.6148(2) 0.0881(6) 0.0463(18) Uani 1 1 d . . . . .
 H16 H 0.116994 0.598515 0.033380 0.056 Uiso 1 1 calc R U . . .
 C25 C -0.1560(6) 0.7981(2) 0.1138(5) 0.0411(16) Uani 1 1 d . . . . .
 H25D H -0.189417 0.822478 0.132343 0.062 Uiso 1 1 calc R U . . .
 H25E H -0.196571 0.776895 0.141529 0.062 Uiso 1 1 calc R U . . .
 H25F H -0.160496 0.795801 0.048957 0.062 Uiso 1 1 calc R U . . .
 C20 C 0.1109(7) 0.5763(2) 0.3402(5) 0.0447(17) Uani 1 1 d . . . . .
 C23B C 0.4849(7) 0.3733(2) 0.2759(5) 0.0479(19) Uani 1 1 d . . . . .
 H23A H 0.556981 0.363990 0.253739 0.072 Uiso 1 1 calc R U . . .
 H23B H 0.490348 0.400811 0.288485 0.072 Uiso 1 1 calc R U . . .
 H23C H 0.427004 0.368971 0.230861 0.072 Uiso 1 1 calc R U . . .
 C25B C 0.6693(6) 0.0355(2) 0.4231(5) 0.0420(17) Uani 1 1 d . . . . .
 H25A H 0.699289 0.045707 0.478868 0.063 Uiso 1 1 calc R U . . .
 H25B H 0.690809 0.008493 0.417169 0.063 Uiso 1 1 calc R U . . .
 H25C H 0.587542 0.037545 0.423382 0.063 Uiso 1 1 calc R U . . .
 C11 C -0.0569(6) 0.7383(2) 0.2530(5) 0.0399(16) Uani 1 1 d . . . . .
 H11A H -0.030087 0.750746 0.308230 0.048 Uiso 1 1 calc R U . . .
 H11C H -0.136888 0.745087 0.245784 0.048 Uiso 1 1 calc R U . . .
 C29B C 0.3277(6) 0.36254(19) 0.3898(6) 0.0436(18) Uani 1 1 d . . . . .
 H29A H 0.275869 0.350986 0.345982 0.052 Uiso 1 1 calc R U . . .
 H29B H 0.309223 0.351917 0.448997 0.052 Uiso 1 1 calc R U . . .
 C26B C 0.3726(6) 0.0922(2) 0.2818(5) 0.0404(16) Uani 1 1 d . . . . .
 H26A H 0.345425 0.117155 0.304685 0.048 Uiso 1 1 calc R U . . .
 H26B H 0.332509 0.086832 0.225598 0.048 Uiso 1 1 calc R U . . .
 C24 C -0.0608(7) 0.8656(2) -0.0120(6) 0.0480(19) Uani 1 1 d . . . . .
 H24D H -0.065481 0.847979 -0.063335 0.058 Uiso 1 1 calc R U . . .
 H24E H -0.127409 0.861147 0.025723 0.058 Uiso 1 1 calc R U . . .
 C24B C 0.8483(6) 0.0549(2) 0.3439(7) 0.052(2) Uani 1 1 d . . . . .
 H24A H 0.882515 0.071789 0.299596 0.078 Uiso 1 1 calc R U . . .
 H24B H 0.868235 0.028256 0.330790 0.078 Uiso 1 1 calc R U . . .
 H24C H 0.875575 0.061718 0.403231 0.078 Uiso 1 1 calc R U . . .
 C30 C 0.0028(8) 0.5665(2) 0.3908(5) 0.051(2) Uani 1 1 d . . . . .
 H30A H -0.001257 0.581830 0.445241 0.077 Uiso 1 1 calc R U . . .
 H30B H 0.002969 0.539221 0.406257 0.077 Uiso 1 1 calc R U . . .
 H30C H -0.062051 0.572113 0.353174 0.077 Uiso 1 1 calc R U . . .
 C29 C 0.2135(9) 0.5700(3) 0.4027(7) 0.072(3) Uani 1 1 d . . . . .
 H29C H 0.281656 0.579038 0.373158 0.108 Uiso 1 1 calc R U . . .
 H29D H 0.220878 0.542653 0.416171 0.108 Uiso 1 1 calc R U . . .
 H29E H 0.202410 0.584298 0.458044 0.108 Uiso 1 1 calc R U . . .

loop_
  _atom_site_aniso_label
  _atom_site_aniso_U_11
  _atom_site_aniso_U_22
  _atom_site_aniso_U_33
  _atom_site_aniso_U_23
  _atom_site_aniso_U_13
  _atom_site_aniso_U_12
 O1B 0.047(3) 0.046(3) 0.041(3) -0.007(2) -0.004(3) -0.005(2)
 O5B 0.062(4) 0.041(3) 0.045(3) -0.004(2) -0.008(3) 0.002(2)
 O2B 0.037(3) 0.046(3) 0.059(3) -0.009(3) -0.003(3) 0.004(2)
 O4B 0.060(3) 0.051(3) 0.034(3) -0.002(2) 0.008(3) -0.006(2)
 O1 0.055(3) 0.044(3) 0.041(3) -0.001(2) 0.007(3) -0.002(2)
 O4 0.062(4) 0.069(4) 0.028(3) -0.002(2) -0.003(3) 0.000(3)
 O6 0.056(3) 0.036(3) 0.070(4) 0.004(2) -0.007(3) 0.002(2)
 O5 0.075(4) 0.056(3) 0.035(3) -0.003(2) 0.000(3) 0.005(3)
 O3B 0.046(3) 0.059(4) 0.063(4) 0.007(3) 0.003(3) -0.008(3)
 O3 0.048(3) 0.066(4) 0.085(5) 0.010(3) 0.016(3) 0.005(3)
 O2 0.073(5) 0.075(4) 0.067(4) -0.001(3) -0.008(4) 0.001(4)
 C10B 0.021(3) 0.045(4) 0.026(3) 0.010(3) -0.008(3) -0.006(3)
 C9 0.025(3) 0.047(4) 0.019(3) -0.007(3) 0.006(3) -0.007(3)
 C13 0.020(3) 0.050(4) 0.029(3) 0.001(3) -0.001(3) -0.005(3)
 C17B 0.031(3) 0.052(4) 0.017(3) 0.001(3) 0.001(3) 0.005(3)
 C5 0.023(3) 0.052(4) 0.018(3) -0.002(3) 0.003(3) -0.008(3)
 O6B 0.072(4) 0.072(4) 0.104(5) -0.006(4) -0.016(5) 0.017(3)
 C22B 0.040(4) 0.042(4) 0.026(3) -0.002(3) 0.000(3) -0.007(3)
 C14B 0.030(3) 0.037(3) 0.025(3) -0.001(3) -0.003(3) 0.002(3)
 C8 0.038(4) 0.048(4) 0.014(3) -0.004(3) 0.007(3) -0.001(3)
 C11B 0.037(4) 0.038(3) 0.025(3) 0.007(3) -0.003(3) 0.000(3)
 C12B 0.040(4) 0.046(4) 0.023(3) 0.002(3) -0.003(3) 0.004(3)
 C21B 0.040(4) 0.036(3) 0.034(4) 0.000(3) -0.004(3) 0.001(3)
 C18 0.032(3) 0.050(4) 0.028(3) -0.005(3) 0.008(3) -0.008(3)
 C5B 0.022(3) 0.046(4) 0.032(4) 0.003(3) -0.002(3) -0.003(3)
 C17 0.042(4) 0.041(4) 0.034(4) -0.003(3) 0.007(3) -0.004(3)
 C18B 0.031(3) 0.041(3) 0.018(3) -0.001(2) 0.002(3) -0.002(3)
 C1B 0.040(4) 0.045(4) 0.026(3) -0.003(3) -0.005(3) -0.011(3)
 C7 0.036(4) 0.044(4) 0.037(4) -0.004(3) 0.013(3) -0.001(3)
 C15B 0.028(3) 0.047(4) 0.031(4) 0.005(3) -0.006(3) 0.000(3)
 C6B 0.025(3) 0.042(4) 0.038(4) 0.002(3) -0.011(3) -0.004(3)
 C9B 0.038(4) 0.039(3) 0.022(3) 0.003(3) -0.004(3) 0.001(3)
 C4B 0.028(3) 0.036(3) 0.042(4) 0.002(3) -0.003(3) 0.000(3)
 C6 0.047(4) 0.055(4) 0.018(3) -0.003(3) 0.006(3) -0.004(3)
 C13B 0.034(4) 0.038(3) 0.022(3) -0.001(3) -0.010(3) 0.000(3)
 C1 0.040(4) 0.051(4) 0.029(4) -0.004(3) 0.008(3) -0.008(3)
 C3B 0.028(3) 0.045(4) 0.039(4) -0.001(3) -0.002(3) 0.001(3)
 C15 0.045(4) 0.044(4) 0.025(3) -0.003(3) 0.014(3) 0.000(3)
 C10 0.033(4) 0.046(4) 0.019(3) -0.003(3) 0.005(3) -0.002(3)
 C8B 0.054(5) 0.039(4) 0.022(3) 0.002(3) -0.007(3) 0.000(3)
 C12 0.035(4) 0.060(4) 0.030(4) 0.000(3) 0.014(3) -0.009(3)
 C16B 0.053(5) 0.041(4) 0.034(4) 0.001(3) -0.011(4) 0.001(3)
 C14 0.028(3) 0.047(4) 0.024(4) -0.003(3) 0.011(3) -0.001(3)
 C20B 0.057(5) 0.045(4) 0.023(3) 0.001(3) -0.004(3) 0.001(3)
 C26 0.042(4) 0.054(4) 0.041(4) -0.001(3) 0.003(4) -0.004(3)
 C22 0.040(4) 0.043(4) 0.030(3) 0.000(3) 0.003(3) -0.004(3)
 C7B 0.040(4) 0.046(4) 0.026(3) 0.001(3) -0.006(3) 0.000(3)
 C4 0.030(3) 0.049(4) 0.033(4) -0.002(3) 0.003(3) -0.002(3)
 C19B 0.043(4) 0.044(4) 0.031(4) -0.002(3) -0.009(3) -0.001(3)
 C28B 0.035(4) 0.041(4) 0.045(4) -0.004(3) -0.005(3) 0.000(3)
 C2B 0.037(4) 0.043(4) 0.045(4) -0.003(3) 0.000(3) -0.004(3)
 C27B 0.035(4) 0.043(4) 0.047(4) -0.002(3) 0.003(3) 0.002(3)
 C3 0.033(4) 0.048(4) 0.034(4) -0.005(3) 0.002(3) -0.006(3)
 C28 0.044(4) 0.050(4) 0.032(4) 0.002(3) -0.005(3) 0.003(3)
 C01L 0.039(4) 0.054(4) 0.039(4) 0.000(3) 0.008(3) 0.004(3)
 C23 0.051(5) 0.050(4) 0.032(4) -0.003(3) 0.007(4) -0.008(3)
 C19 0.042(4) 0.049(4) 0.035(4) -0.001(3) -0.006(3) -0.008(3)
 C27 0.032(4) 0.051(4) 0.036(4) 0.006(3) 0.002(3) -0.001(3)
 C2 0.040(4) 0.044(4) 0.041(4) -0.010(3) 0.001(3) 0.005(3)
 C21 0.046(4) 0.047(4) 0.039(4) 0.000(3) -0.008(4) -0.001(3)
 C16 0.046(4) 0.046(4) 0.048(5) -0.004(3) 0.010(4) -0.006(3)
 C25 0.037(4) 0.046(4) 0.041(4) -0.002(3) 0.002(3) 0.002(3)
 C20 0.043(4) 0.053(4) 0.038(4) -0.002(3) -0.005(4) -0.005(3)
 C23B 0.065(5) 0.047(4) 0.031(4) 0.003(3) -0.002(4) 0.003(4)
 C25B 0.037(4) 0.052(4) 0.037(4) 0.004(3) 0.004(3) 0.002(3)
 C11 0.035(4) 0.057(4) 0.028(4) -0.006(3) 0.015(3) -0.002(3)
 C29B 0.033(4) 0.035(4) 0.062(5) -0.006(3) -0.006(4) 0.008(3)
 C26B 0.039(4) 0.043(4) 0.039(4) 0.006(3) -0.009(3) -0.003(3)
 C24 0.048(5) 0.049(4) 0.047(5) 0.004(4) -0.006(4) -0.001(4)
 C24B 0.026(4) 0.048(4) 0.082(6) 0.002(4) -0.002(4) 0.001(3)
 C30 0.075(6) 0.043(4) 0.035(4) -0.003(3) 0.004(4) -0.014(4)
 C29 0.096(8) 0.059(5) 0.061(6) 0.010(4) -0.036(6) -0.015(5)

_geom_special_details
;
 All esds (except the esd in the dihedral angle between two l.s. planes)
 are estimated using the full covariance matrix.  The cell esds are taken
 into account individually in the estimation of esds in distances, angles
 and torsion angles; correlations between esds in cell parameters are only
 used when they are defined by crystal symmetry.  An approximate (isotropic)
 treatment of cell esds is used for estimating esds involving l.s. planes.
;
loop_
  _geom_bond_atom_site_label_1
  _geom_bond_atom_site_label_2
  _geom_bond_distance
  _geom_bond_site_symmetry_2
  _geom_bond_publ_flag
 O1B H1B 0.8200 . ?
 O1B C1B 1.427(8) . ?
 O5B H5B 0.8200 . ?
 O5B C21B 1.430(8) . ?
 O2B H2B 0.8200 . ?
 O2B C2B 1.463(8) . ?
 O4B H4B 0.8200 . ?
 O4B C7B 1.420(8) . ?
 O1 H1 0.8200 . ?
 O1 C3 1.441(8) . ?
 O4 H4 0.8200 . ?
 O4 C28 1.450(9) . ?
 O6 H6 0.8200 . ?
 O6 C21 1.436(9) . ?
 O5 H5 0.8200 . ?
 O5 C22 1.463(8) . ?
 O3B H3B 0.8200 . ?
 O3B C26B 1.422(9) . ?
 O3 H3 0.8200 . ?
 O3 C16 1.462(10) . ?
 O2 H2 0.8200 . ?
 O2 C24 1.414(9) . ?
 C10B C11B 1.328(9) . ?
 C10B C5B 1.518(9) . ?
 C10B C9B 1.537(8) . ?
 C9 H9 0.9800 . ?
 C9 C8 1.553(8) . ?
 C9 C10 1.544(9) . ?
 C9 C11 1.552(9) . ?
 C13 C18 1.507(9) . ?
 C13 C12 1.345(10) . ?
 C13 C14 1.532(9) . ?
 C17B H17B 0.9800 . ?
 C17B C22B 1.563(9) . ?
 C17B C18B 1.547(8) . ?
 C17B C16B 1.531(9) . ?
 C5 H5A 0.9800 . ?
 C5 C6 1.527(9) . ?
 C5 C10 1.552(8) . ?
 C5 C4 1.556(9) . ?
 O6B H6B 0.8200 . ?
 O6B C29B 1.420(9) . ?
 C22B C21B 1.528(9) . ?
 C22B C23B 1.563(9) . ?
 C22B C29B 1.560(10) . ?
 C14B C15B 1.556(9) . ?
 C14B C9B 1.586(9) . ?
 C14B C13B 1.556(8) . ?
 C14B C28B 1.544(9) . ?
 C8 C7 1.538(9) . ?
 C8 C14 1.588(10) . ?
 C8 C26 1.540(10) . ?
 C11B H11B 0.9300 . ?
 C11B C12B 1.484(9) . ?
 C12B H12A 0.9700 . ?
 C12B H12B 0.9700 . ?
 C12B C13B 1.549(9) . ?
 C21B H21B 0.9800 . ?
 C21B C20B 1.533(9) . ?
 C18 H18 0.9800 . ?
 C18 C17 1.534(9) . ?
 C18 C19 1.554(10) . ?
 C5B H5BA 0.9800 . ?
 C5B C6B 1.556(9) . ?
 C5B C4B 1.547(9) . ?
 C17 C22 1.529(9) . ?
 C17 C28 1.547(10) . ?
 C17 C16 1.546(10) . ?
 C18B C13B 1.571(9) . ?
 C18B C19B 1.554(9) . ?
 C18B C01L 1.558(9) . ?
 C1B H1BA 0.9800 . ?
 C1B C6B 1.565(10) . ?
 C1B C2B 1.514(10) . ?
 C7 H7A 0.9700 . ?
 C7 H7C 0.9700 . ?
 C7 C6 1.513(10) . ?
 C15B H15A 0.9700 . ?
 C15B H15B 0.9700 . ?
 C15B C16B 1.515(10) . ?
 C6B C7B 1.539(9) . ?
 C6B C26B 1.545(10) . ?
 C9B C8B 1.533(9) . ?
 C9B C27B 1.546(10) . ?
 C4B H4BA 0.9700 . ?
 C4B H4BB 0.9700 . ?
 C4B C3B 1.522(9) . ?
 C6 H6A 0.9700 . ?
 C6 H6C 0.9700 . ?
 C13B H13B 0.9800 . ?
 C1 H1A 0.9700 . ?
 C1 H1C 0.9700 . ?
 C1 C10 1.551(9) . ?
 C1 C2 1.523(10) . ?
 C3B C2B 1.500(10) . ?
 C3B C25B 1.576(10) . ?
 C3B C24B 1.521(9) . ?
 C15 H15C 0.9700 . ?
 C15 H15D 0.9700 . ?
 C15 C14 1.552(9) . ?
 C15 C16 1.507(10) . ?
 C10 C25 1.550(9) . ?
 C8B H8BA 0.9700 . ?
 C8B H8BB 0.9700 . ?
 C8B C7B 1.533(9) . ?
 C12 H12 0.9300 . ?
 C12 C11 1.484(10) . ?
 C16B H16A 0.9700 . ?
 C16B H16B 0.9700 . ?
 C14 C27 1.548(9) . ?
 C20B H20A 0.9700 . ?
 C20B H20B 0.9700 . ?
 C20B C19B 1.520(10) . ?
 C26 H26C 0.9600 . ?
 C26 H26D 0.9600 . ?
 C26 H26E 0.9600 . ?
 C22 H22 0.9800 . ?
 C22 C21 1.491(10) . ?
 C7B H7B 0.9800 . ?
 C4 C3 1.534(9) . ?
 C4 C23 1.548(10) . ?
 C4 C24 1.556(10) . ?
 C19B H19A 0.9700 . ?
 C19B H19B 0.9700 . ?
 C28B H28A 0.9600 . ?
 C28B H28B 0.9600 . ?
 C28B H28C 0.9600 . ?
 C2B H2BA 0.9800 . ?
 C27B H27A 0.9600 . ?
 C27B H27B 0.9600 . ?
 C27B H27C 0.9600 . ?
 C3 H3A 0.9800 . ?
 C3 C2 1.514(10) . ?
 C28 H28D 0.9700 . ?
 C28 H28E 0.9700 . ?
 C01L H01A 0.9600 . ?
 C01L H01B 0.9600 . ?
 C01L H01C 0.9600 . ?
 C23 H23D 0.9600 . ?
 C23 H23E 0.9600 . ?
 C23 H23F 0.9600 . ?
 C19 H19C 0.9700 . ?
 C19 H19D 0.9700 . ?
 C19 C20 1.521(10) . ?
 C27 H27D 0.9600 . ?
 C27 H27E 0.9600 . ?
 C27 H27F 0.9600 . ?
 C2 H2A 0.9700 . ?
 C2 H2C 0.9700 . ?
 C21 H21 0.9800 . ?
 C21 C20 1.549(10) . ?
 C16 H16 0.9800 . ?
 C25 H25D 0.9600 . ?
 C25 H25E 0.9600 . ?
 C25 H25F 0.9600 . ?
 C20 C30 1.507(11) . ?
 C20 C29 1.529(12) . ?
 C23B H23A 0.9600 . ?
 C23B H23B 0.9600 . ?
 C23B H23C 0.9600 . ?
 C25B H25A 0.9600 . ?
 C25B H25B 0.9600 . ?
 C25B H25C 0.9600 . ?
 C11 H11A 0.9700 . ?
 C11 H11C 0.9700 . ?
 C29B H29A 0.9700 . ?
 C29B H29B 0.9700 . ?
 C26B H26A 0.9700 . ?
 C26B H26B 0.9700 . ?
 C24 H24D 0.9700 . ?
 C24 H24E 0.9700 . ?
 C24B H24A 0.9600 . ?
 C24B H24B 0.9600 . ?
 C24B H24C 0.9600 . ?
 C30 H30A 0.9600 . ?
 C30 H30B 0.9600 . ?
 C30 H30C 0.9600 . ?
 C29 H29C 0.9600 . ?
 C29 H29D 0.9600 . ?
 C29 H29E 0.9600 . ?

loop_
  _geom_angle_atom_site_label_1
  _geom_angle_atom_site_label_2
  _geom_angle_atom_site_label_3
  _geom_angle
  _geom_angle_site_symmetry_1
  _geom_angle_site_symmetry_3
  _geom_angle_publ_flag
 C1B O1B H1B 109.5 . . ?
 C21B O5B H5B 109.5 . . ?
 C2B O2B H2B 109.5 . . ?
 C7B O4B H4B 109.5 . . ?
 C3 O1 H1 109.5 . . ?
 C28 O4 H4 109.5 . . ?
 C21 O6 H6 109.5 . . ?
 C22 O5 H5 109.5 . . ?
 C26B O3B H3B 109.5 . . ?
 C16 O3 H3 109.5 . . ?
 C24 O2 H2 109.5 . . ?
 C11B C10B C5B 120.0(6) . . ?
 C11B C10B C9B 119.3(6) . . ?
 C5B C10B C9B 120.5(5) . . ?
 C8 C9 H9 104.5 . . ?
 C8 C9 C11 110.9(5) . . ?
 C10 C9 H9 104.5 . . ?
 C10 C9 C8 117.2(5) . . ?
 C10 C9 C11 113.7(5) . . ?
 C11 C9 H9 104.5 . . ?
 C18 C13 C14 121.6(6) . . ?
 C12 C13 C18 119.2(6) . . ?
 C12 C13 C14 119.1(6) . . ?
 C22B C17B H17B 104.0 . . ?
 C18B C17B H17B 104.0 . . ?
 C18B C17B C22B 117.7(5) . . ?
 C16B C17B H17B 104.0 . . ?
 C16B C17B C22B 113.9(5) . . ?
 C16B C17B C18B 111.4(5) . . ?
 C6 C5 H5A 104.4 . . ?
 C6 C5 C10 110.6(5) . . ?
 C6 C5 C4 115.0(5) . . ?
 C10 C5 H5A 104.4 . . ?
 C10 C5 C4 116.5(5) . . ?
 C4 C5 H5A 104.4 . . ?
 C29B O6B H6B 109.5 . . ?
 C17B C22B C23B 110.0(5) . . ?
 C21B C22B C17B 108.5(5) . . ?
 C21B C22B C23B 107.5(5) . . ?
 C21B C22B C29B 110.6(6) . . ?
 C29B C22B C17B 112.7(5) . . ?
 C29B C22B C23B 107.4(6) . . ?
 C15B C14B C9B 110.6(5) . . ?
 C13B C14B C15B 109.4(5) . . ?
 C13B C14B C9B 108.0(5) . . ?
 C28B C14B C15B 108.2(5) . . ?
 C28B C14B C9B 110.6(5) . . ?
 C28B C14B C13B 110.1(5) . . ?
 C9 C8 C14 108.2(5) . . ?
 C7 C8 C9 108.6(5) . . ?
 C7 C8 C14 110.1(5) . . ?
 C7 C8 C26 108.8(5) . . ?
 C26 C8 C9 111.0(6) . . ?
 C26 C8 C14 110.1(6) . . ?
 C10B C11B H11B 116.3 . . ?
 C10B C11B C12B 127.4(6) . . ?
 C12B C11B H11B 116.3 . . ?
 C11B C12B H12A 108.7 . . ?
 C11B C12B H12B 108.7 . . ?
 C11B C12B C13B 114.0(5) . . ?
 H12A C12B H12B 107.6 . . ?
 C13B C12B H12A 108.7 . . ?
 C13B C12B H12B 108.7 . . ?
 O5B C21B C22B 109.8(5) . . ?
 O5B C21B H21B 107.5 . . ?
 O5B C21B C20B 109.6(5) . . ?
 C22B C21B H21B 107.5 . . ?
 C22B C21B C20B 114.5(6) . . ?
 C20B C21B H21B 107.5 . . ?
 C13 C18 H18 105.7 . . ?
 C13 C18 C17 113.0(5) . . ?
 C13 C18 C19 112.7(5) . . ?
 C17 C18 H18 105.7 . . ?
 C17 C18 C19 113.1(6) . . ?
 C19 C18 H18 105.7 . . ?
 C10B C5B H5BA 105.9 . . ?
 C10B C5B C6B 114.7(5) . . ?
 C10B C5B C4B 111.0(5) . . ?
 C6B C5B H5BA 105.9 . . ?
 C4B C5B H5BA 105.9 . . ?
 C4B C5B C6B 112.8(6) . . ?
 C18 C17 C28 107.0(6) . . ?
 C18 C17 C16 110.9(6) . . ?
 C22 C17 C18 109.8(6) . . ?
 C22 C17 C28 107.2(5) . . ?
 C22 C17 C16 113.0(6) . . ?
 C16 C17 C28 108.7(6) . . ?
 C17B C18B C13B 106.2(5) . . ?
 C17B C18B C19B 108.1(5) . . ?
 C17B C18B C01L 113.6(6) . . ?
 C19B C18B C13B 107.3(5) . . ?
 C19B C18B C01L 107.7(5) . . ?
 C01L C18B C13B 113.7(6) . . ?
 O1B C1B H1BA 106.2 . . ?
 O1B C1B C6B 109.9(5) . . ?
 O1B C1B C2B 110.7(6) . . ?
 C6B C1B H1BA 106.2 . . ?
 C2B C1B H1BA 106.2 . . ?
 C2B C1B C6B 116.8(5) . . ?
 C8 C7 H7A 108.7 . . ?
 C8 C7 H7C 108.7 . . ?
 H7A C7 H7C 107.6 . . ?
 C6 C7 C8 114.2(6) . . ?
 C6 C7 H7A 108.7 . . ?
 C6 C7 H7C 108.7 . . ?
 C14B C15B H15A 108.6 . . ?
 C14B C15B H15B 108.6 . . ?
 H15A C15B H15B 107.6 . . ?
 C16B C15B C14B 114.5(6) . . ?
 C16B C15B H15A 108.6 . . ?
 C16B C15B H15B 108.6 . . ?
 C5B C6B C1B 110.7(5) . . ?
 C7B C6B C5B 111.8(5) . . ?
 C7B C6B C1B 111.2(6) . . ?
 C7B C6B C26B 106.8(5) . . ?
 C26B C6B C5B 108.3(6) . . ?
 C26B C6B C1B 107.9(5) . . ?
 C10B C9B C14B 108.2(5) . . ?
 C10B C9B C27B 106.9(5) . . ?
 C8B C9B C10B 111.6(5) . . ?
 C8B C9B C14B 110.3(5) . . ?
 C8B C9B C27B 107.0(6) . . ?
 C27B C9B C14B 112.8(5) . . ?
 C5B C4B H4BA 108.9 . . ?
 C5B C4B H4BB 108.9 . . ?
 H4BA C4B H4BB 107.7 . . ?
 C3B C4B C5B 113.5(5) . . ?
 C3B C4B H4BA 108.9 . . ?
 C3B C4B H4BB 108.9 . . ?
 C5 C6 H6A 109.3 . . ?
 C5 C6 H6C 109.3 . . ?
 C7 C6 C5 111.5(6) . . ?
 C7 C6 H6A 109.3 . . ?
 C7 C6 H6C 109.3 . . ?
 H6A C6 H6C 108.0 . . ?
 C14B C13B C18B 117.1(5) . . ?
 C14B C13B H13B 104.9 . . ?
 C12B C13B C14B 110.2(5) . . ?
 C12B C13B C18B 113.6(5) . . ?
 C12B C13B H13B 104.9 . . ?
 C18B C13B H13B 104.9 . . ?
 H1A C1 H1C 107.8 . . ?
 C10 C1 H1A 109.1 . . ?
 C10 C1 H1C 109.1 . . ?
 C2 C1 H1A 109.1 . . ?
 C2 C1 H1C 109.1 . . ?
 C2 C1 C10 112.6(6) . . ?
 C4B C3B C25B 110.9(6) . . ?
 C4B C3B C24B 107.9(6) . . ?
 C2B C3B C4B 107.3(6) . . ?
 C2B C3B C25B 113.2(6) . . ?
 C2B C3B C24B 110.4(6) . . ?
 C24B C3B C25B 106.9(6) . . ?
 H15C C15 H15D 107.1 . . ?
 C14 C15 H15C 107.8 . . ?
 C14 C15 H15D 107.8 . . ?
 C16 C15 H15C 107.8 . . ?
 C16 C15 H15D 107.8 . . ?
 C16 C15 C14 118.1(6) . . ?
 C9 C10 C5 106.8(5) . . ?
 C9 C10 C1 107.9(5) . . ?
 C9 C10 C25 112.9(5) . . ?
 C5 C10 C25 113.8(5) . . ?
 C1 C10 C5 108.3(5) . . ?
 C1 C10 C25 107.0(6) . . ?
 C9B C8B H8BA 107.9 . . ?
 C9B C8B H8BB 107.9 . . ?
 C9B C8B C7B 117.8(6) . . ?
 H8BA C8B H8BB 107.2 . . ?
 C7B C8B H8BA 107.9 . . ?
 C7B C8B H8BB 107.9 . . ?
 C13 C12 H12 116.9 . . ?
 C13 C12 C11 126.3(6) . . ?
 C11 C12 H12 116.9 . . ?
 C17B C16B H16A 109.7 . . ?
 C17B C16B H16B 109.7 . . ?
 C15B C16B C17B 110.0(6) . . ?
 C15B C16B H16A 109.7 . . ?
 C15B C16B H16B 109.7 . . ?
 H16A C16B H16B 108.2 . . ?
 C13 C14 C8 108.6(5) . . ?
 C13 C14 C15 111.2(5) . . ?
 C13 C14 C27 106.4(5) . . ?
 C15 C14 C8 110.0(5) . . ?
 C27 C14 C8 113.7(5) . . ?
 C27 C14 C15 106.7(5) . . ?
 C21B C20B H20A 109.2 . . ?
 C21B C20B H20B 109.2 . . ?
 H20A C20B H20B 107.9 . . ?
 C19B C20B C21B 112.0(6) . . ?
 C19B C20B H20A 109.2 . . ?
 C19B C20B H20B 109.2 . . ?
 C8 C26 H26C 109.5 . . ?
 C8 C26 H26D 109.5 . . ?
 C8 C26 H26E 109.5 . . ?
 H26C C26 H26D 109.5 . . ?
 H26C C26 H26E 109.5 . . ?
 H26D C26 H26E 109.5 . . ?
 O5 C22 C17 108.9(5) . . ?
 O5 C22 H22 106.4 . . ?
 O5 C22 C21 110.6(6) . . ?
 C17 C22 H22 106.4 . . ?
 C21 C22 C17 117.6(6) . . ?
 C21 C22 H22 106.4 . . ?
 O4B C7B C6B 112.5(5) . . ?
 O4B C7B C8B 109.9(6) . . ?
 O4B C7B H7B 107.4 . . ?
 C6B C7B H7B 107.4 . . ?
 C8B C7B C6B 112.0(5) . . ?
 C8B C7B H7B 107.4 . . ?
 C5 C4 C24 113.1(6) . . ?
 C3 C4 C5 108.4(6) . . ?
 C3 C4 C23 108.1(6) . . ?
 C3 C4 C24 111.3(6) . . ?
 C23 C4 C5 107.8(6) . . ?
 C23 C4 C24 107.9(6) . . ?
 C18B C19B H19A 109.0 . . ?
 C18B C19B H19B 109.0 . . ?
 C20B C19B C18B 112.8(6) . . ?
 C20B C19B H19A 109.0 . . ?
 C20B C19B H19B 109.0 . . ?
 H19A C19B H19B 107.8 . . ?
 C14B C28B H28A 109.5 . . ?
 C14B C28B H28B 109.5 . . ?
 C14B C28B H28C 109.5 . . ?
 H28A C28B H28B 109.5 . . ?
 H28A C28B H28C 109.5 . . ?
 H28B C28B H28C 109.5 . . ?
 O2B C2B C1B 105.9(5) . . ?
 O2B C2B C3B 111.2(6) . . ?
 O2B C2B H2BA 108.7 . . ?
 C1B C2B H2BA 108.7 . . ?
 C3B C2B C1B 113.5(6) . . ?
 C3B C2B H2BA 108.7 . . ?
 C9B C27B H27A 109.5 . . ?
 C9B C27B H27B 109.5 . . ?
 C9B C27B H27C 109.5 . . ?
 H27A C27B H27B 109.5 . . ?
 H27A C27B H27C 109.5 . . ?
 H27B C27B H27C 109.5 . . ?
 O1 C3 C4 112.3(6) . . ?
 O1 C3 H3A 107.8 . . ?
 O1 C3 C2 107.2(6) . . ?
 C4 C3 H3A 107.8 . . ?
 C2 C3 C4 113.7(6) . . ?
 C2 C3 H3A 107.8 . . ?
 O4 C28 C17 114.9(6) . . ?
 O4 C28 H28D 108.5 . . ?
 O4 C28 H28E 108.5 . . ?
 C17 C28 H28D 108.5 . . ?
 C17 C28 H28E 108.5 . . ?
 H28D C28 H28E 107.5 . . ?
 C18B C01L H01A 109.5 . . ?
 C18B C01L H01B 109.5 . . ?
 C18B C01L H01C 109.5 . . ?
 H01A C01L H01B 109.5 . . ?
 H01A C01L H01C 109.5 . . ?
 H01B C01L H01C 109.5 . . ?
 C4 C23 H23D 109.5 . . ?
 C4 C23 H23E 109.5 . . ?
 C4 C23 H23F 109.5 . . ?
 H23D C23 H23E 109.5 . . ?
 H23D C23 H23F 109.5 . . ?
 H23E C23 H23F 109.5 . . ?
 C18 C19 H19C 108.9 . . ?
 C18 C19 H19D 108.9 . . ?
 H19C C19 H19D 107.7 . . ?
 C20 C19 C18 113.5(6) . . ?
 C20 C19 H19C 108.9 . . ?
 C20 C19 H19D 108.9 . . ?
 C14 C27 H27D 109.5 . . ?
 C14 C27 H27E 109.5 . . ?
 C14 C27 H27F 109.5 . . ?
 H27D C27 H27E 109.5 . . ?
 H27D C27 H27F 109.5 . . ?
 H27E C27 H27F 109.5 . . ?
 C1 C2 H2A 109.1 . . ?
 C1 C2 H2C 109.1 . . ?
 C3 C2 C1 112.6(6) . . ?
 C3 C2 H2A 109.1 . . ?
 C3 C2 H2C 109.1 . . ?
 H2A C2 H2C 107.8 . . ?
 O6 C21 C22 108.3(6) . . ?
 O6 C21 H21 109.0 . . ?
 O6 C21 C20 109.0(6) . . ?
 C22 C21 H21 109.0 . . ?
 C22 C21 C20 112.3(6) . . ?
 C20 C21 H21 109.0 . . ?
 O3 C16 C17 107.2(6) . . ?
 O3 C16 C15 110.6(6) . . ?
 O3 C16 H16 108.6 . . ?
 C17 C16 H16 108.6 . . ?
 C15 C16 C17 113.0(6) . . ?
 C15 C16 H16 108.6 . . ?
 C10 C25 H25D 109.5 . . ?
 C10 C25 H25E 109.5 . . ?
 C10 C25 H25F 109.5 . . ?
 H25D C25 H25E 109.5 . . ?
 H25D C25 H25F 109.5 . . ?
 H25E C25 H25F 109.5 . . ?
 C19 C20 C21 107.9(6) . . ?
 C19 C20 C29 108.1(6) . . ?
 C30 C20 C19 111.5(6) . . ?
 C30 C20 C21 111.3(6) . . ?
 C30 C20 C29 109.2(7) . . ?
 C29 C20 C21 108.7(7) . . ?
 C22B C23B H23A 109.5 . . ?
 C22B C23B H23B 109.5 . . ?
 C22B C23B H23C 109.5 . . ?
 H23A C23B H23B 109.5 . . ?
 H23A C23B H23C 109.5 . . ?
 H23B C23B H23C 109.5 . . ?
 C3B C25B H25A 109.5 . . ?
 C3B C25B H25B 109.5 . . ?
 C3B C25B H25C 109.5 . . ?
 H25A C25B H25B 109.5 . . ?
 H25A C25B H25C 109.5 . . ?
 H25B C25B H25C 109.5 . . ?
 C9 C11 H11A 108.5 . . ?
 C9 C11 H11C 108.5 . . ?
 C12 C11 C9 115.3(5) . . ?
 C12 C11 H11A 108.5 . . ?
 C12 C11 H11C 108.5 . . ?
 H11A C11 H11C 107.5 . . ?
 O6B C29B C22B 112.6(6) . . ?
 O6B C29B H29A 109.1 . . ?
 O6B C29B H29B 109.1 . . ?
 C22B C29B H29A 109.1 . . ?
 C22B C29B H29B 109.1 . . ?
 H29A C29B H29B 107.8 . . ?
 O3B C26B C6B 112.7(6) . . ?
 O3B C26B H26A 109.0 . . ?
 O3B C26B H26B 109.0 . . ?
 C6B C26B H26A 109.0 . . ?
 C6B C26B H26B 109.0 . . ?
 H26A C26B H26B 107.8 . . ?
 O2 C24 C4 114.4(6) . . ?
 O2 C24 H24D 108.7 . . ?
 O2 C24 H24E 108.7 . . ?
 C4 C24 H24D 108.7 . . ?
 C4 C24 H24E 108.7 . . ?
 H24D C24 H24E 107.6 . . ?
 C3B C24B H24A 109.5 . . ?
 C3B C24B H24B 109.5 . . ?
 C3B C24B H24C 109.5 . . ?
 H24A C24B H24B 109.5 . . ?
 H24A C24B H24C 109.5 . . ?
 H24B C24B H24C 109.5 . . ?
 C20 C30 H30A 109.5 . . ?
 C20 C30 H30B 109.5 . . ?
 C20 C30 H30C 109.5 . . ?
 H30A C30 H30B 109.5 . . ?
 H30A C30 H30C 109.5 . . ?
 H30B C30 H30C 109.5 . . ?
 C20 C29 H29C 109.5 . . ?
 C20 C29 H29D 109.5 . . ?
 C20 C29 H29E 109.5 . . ?
 H29C C29 H29D 109.5 . . ?
 H29C C29 H29E 109.5 . . ?
 H29D C29 H29E 109.5 . . ?

loop_
  _geom_torsion_atom_site_label_1
  _geom_torsion_atom_site_label_2
  _geom_torsion_atom_site_label_3
  _geom_torsion_atom_site_label_4
  _geom_torsion
  _geom_torsion_site_symmetry_1
  _geom_torsion_site_symmetry_2
  _geom_torsion_site_symmetry_3
  _geom_torsion_site_symmetry_4
  _geom_torsion_publ_flag
 O1B C1B C6B C5B -167.5(5) . . . . ?
 O1B C1B C6B C7B -42.5(7) . . . . ?
 O1B C1B C6B C26B 74.2(7) . . . . ?
 O1B C1B C2B O2B -60.9(7) . . . . ?
 O1B C1B C2B C3B 176.7(6) . . . . ?
 O5B C21B C20B C19B 178.7(6) . . . . ?
 O1 C3 C2 C1 -179.9(6) . . . . ?
 O6 C21 C20 C19 -174.5(6) . . . . ?
 O6 C21 C20 C30 -51.9(8) . . . . ?
 O6 C21 C20 C29 68.4(8) . . . . ?
 O5 C22 C21 O6 -61.2(8) . . . . ?
 O5 C22 C21 C20 178.3(6) . . . . ?
 C10B C11B C12B C13B -1.6(10) . . . . ?
 C10B C5B C6B C1B 170.1(5) . . . . ?
 C10B C5B C6B C7B 45.5(7) . . . . ?
 C10B C5B C6B C26B -71.8(7) . . . . ?
 C10B C5B C4B C3B 174.6(6) . . . . ?
 C10B C9B C8B C7B -39.4(9) . . . . ?
 C9 C8 C7 C6 -48.0(8) . . . . ?
 C9 C8 C14 C13 60.9(7) . . . . ?
 C9 C8 C14 C15 -177.1(5) . . . . ?
 C9 C8 C14 C27 -57.4(7) . . . . ?
 C13 C18 C17 C22 175.6(5) . . . . ?
 C13 C18 C17 C28 -68.4(7) . . . . ?
 C13 C18 C17 C16 50.0(8) . . . . ?
 C13 C18 C19 C20 175.5(6) . . . . ?
 C13 C12 C11 C9 1.9(11) . . . . ?
 C17B C22B C21B O5B -173.0(5) . . . . ?
 C17B C22B C21B C20B -49.2(8) . . . . ?
 C17B C22B C29B O6B -172.3(6) . . . . ?
 C17B C18B C13B C14B -53.1(7) . . . . ?
 C17B C18B C13B C12B 176.6(5) . . . . ?
 C17B C18B C19B C20B 52.9(7) . . . . ?
 C5 C4 C3 O1 -173.3(5) . . . . ?
 C5 C4 C3 C2 -51.4(8) . . . . ?
 C5 C4 C24 O2 -173.8(6) . . . . ?
 C22B C17B C18B C13B -166.4(5) . . . . ?
 C22B C17B C18B C19B -51.5(7) . . . . ?
 C22B C17B C18B C01L 67.9(7) . . . . ?
 C22B C17B C16B C15B 160.8(6) . . . . ?
 C22B C21B C20B C19B 54.8(9) . . . . ?
 C14B C15B C16B C17B 56.2(8) . . . . ?
 C14B C9B C8B C7B -159.8(6) . . . . ?
 C8 C9 C10 C5 -54.8(7) . . . . ?
 C8 C9 C10 C1 -171.0(5) . . . . ?
 C8 C9 C10 C25 71.0(7) . . . . ?
 C8 C9 C11 C12 27.3(8) . . . . ?
 C8 C7 C6 C5 55.8(8) . . . . ?
 C11B C10B C5B C6B 148.6(6) . . . . ?
 C11B C10B C5B C4B -82.2(8) . . . . ?
 C11B C10B C9B C14B -31.6(8) . . . . ?
 C11B C10B C9B C8B -153.2(7) . . . . ?
 C11B C10B C9B C27B 90.1(7) . . . . ?
 C11B C12B C13B C14B 31.6(8) . . . . ?
 C11B C12B C13B C18B 165.3(6) . . . . ?
 C21B C22B C29B O6B 66.0(8) . . . . ?
 C21B C20B C19B C18B -56.1(8) . . . . ?
 C18 C13 C12 C11 176.8(7) . . . . ?
 C18 C13 C14 C8 151.9(6) . . . . ?
 C18 C13 C14 C15 30.6(8) . . . . ?
 C18 C13 C14 C27 -85.2(7) . . . . ?
 C18 C17 C22 O5 -173.6(6) . . . . ?
 C18 C17 C22 C21 -46.9(8) . . . . ?
 C18 C17 C28 O4 176.5(6) . . . . ?
 C18 C17 C16 O3 67.8(7) . . . . ?
 C18 C17 C16 C15 -54.4(8) . . . . ?
 C18 C19 C20 C21 56.5(8) . . . . ?
 C18 C19 C20 C30 -65.9(8) . . . . ?
 C18 C19 C20 C29 174.0(7) . . . . ?
 C5B C10B C11B C12B 176.7(6) . . . . ?
 C5B C10B C9B C14B 153.9(5) . . . . ?
 C5B C10B C9B C8B 32.3(8) . . . . ?
 C5B C10B C9B C27B -84.4(7) . . . . ?
 C5B C6B C7B O4B 72.2(7) . . . . ?
 C5B C6B C7B C8B -52.2(8) . . . . ?
 C5B C6B C26B O3B -69.3(7) . . . . ?
 C5B C4B C3B C2B 61.1(8) . . . . ?
 C5B C4B C3B C25B -63.1(8) . . . . ?
 C5B C4B C3B C24B -179.9(7) . . . . ?
 C17 C18 C19 C20 -54.8(8) . . . . ?
 C17 C22 C21 O6 173.0(6) . . . . ?
 C17 C22 C21 C20 52.4(9) . . . . ?
 C18B C17B C22B C21B 49.8(7) . . . . ?
 C18B C17B C22B C23B 167.1(6) . . . . ?
 C18B C17B C22B C29B -73.1(7) . . . . ?
 C18B C17B C16B C15B -63.2(8) . . . . ?
 C1B C6B C7B O4B -52.1(7) . . . . ?
 C1B C6B C7B C8B -176.5(6) . . . . ?
 C1B C6B C26B O3B 50.6(8) . . . . ?
 C7 C8 C14 C13 179.5(5) . . . . ?
 C7 C8 C14 C15 -58.5(7) . . . . ?
 C7 C8 C14 C27 61.1(7) . . . . ?
 C15B C14B C9B C10B 179.8(5) . . . . ?
 C15B C14B C9B C8B -57.8(7) . . . . ?
 C15B C14B C9B C27B 61.7(7) . . . . ?
 C15B C14B C13B C12B 178.7(5) . . . . ?
 C15B C14B C13B C18B 46.9(7) . . . . ?
 C6B C5B C4B C3B -55.2(8) . . . . ?
 C6B C1B C2B O2B 172.3(5) . . . . ?
 C6B C1B C2B C3B 49.9(8) . . . . ?
 C9B C10B C11B C12B 2.2(11) . . . . ?
 C9B C10B C5B C6B -36.9(8) . . . . ?
 C9B C10B C5B C4B 92.3(7) . . . . ?
 C9B C14B C15B C16B -165.9(6) . . . . ?
 C9B C14B C13B C12B -60.9(7) . . . . ?
 C9B C14B C13B C18B 167.3(5) . . . . ?
 C9B C8B C7B O4B -74.5(7) . . . . ?
 C9B C8B C7B C6B 51.3(8) . . . . ?
 C4B C5B C6B C1B 41.8(7) . . . . ?
 C4B C5B C6B C7B -82.8(7) . . . . ?
 C4B C5B C6B C26B 159.9(6) . . . . ?
 C4B C3B C2B O2B -176.7(5) . . . . ?
 C4B C3B C2B C1B -57.4(7) . . . . ?
 C6 C5 C10 C9 57.7(7) . . . . ?
 C6 C5 C10 C1 173.6(6) . . . . ?
 C6 C5 C10 C25 -67.5(7) . . . . ?
 C6 C5 C4 C3 -176.2(6) . . . . ?
 C6 C5 C4 C23 -59.4(7) . . . . ?
 C6 C5 C4 C24 59.8(8) . . . . ?
 C13B C14B C15B C16B -47.1(7) . . . . ?
 C13B C14B C9B C10B 60.2(6) . . . . ?
 C13B C14B C9B C8B -177.5(5) . . . . ?
 C13B C14B C9B C27B -57.9(7) . . . . ?
 C13B C18B C19B C20B 167.0(6) . . . . ?
 C10 C9 C8 C7 49.7(8) . . . . ?
 C10 C9 C8 C14 169.1(5) . . . . ?
 C10 C9 C8 C26 -70.0(7) . . . . ?
 C10 C9 C11 C12 161.9(6) . . . . ?
 C10 C5 C6 C7 -60.4(8) . . . . ?
 C10 C5 C4 C3 52.0(7) . . . . ?
 C10 C5 C4 C23 168.8(5) . . . . ?
 C10 C5 C4 C24 -72.0(7) . . . . ?
 C10 C1 C2 C3 -55.5(8) . . . . ?
 C12 C13 C18 C17 144.8(7) . . . . ?
 C12 C13 C18 C19 -85.4(8) . . . . ?
 C12 C13 C14 C8 -33.5(8) . . . . ?
 C12 C13 C14 C15 -154.7(6) . . . . ?
 C12 C13 C14 C27 89.4(7) . . . . ?
 C16B C17B C22B C21B -177.2(6) . . . . ?
 C16B C17B C22B C23B -59.8(8) . . . . ?
 C16B C17B C22B C29B 60.0(8) . . . . ?
 C16B C17B C18B C13B 59.4(7) . . . . ?
 C16B C17B C18B C19B 174.3(6) . . . . ?
 C16B C17B C18B C01L -66.3(7) . . . . ?
 C14 C13 C18 C17 -40.5(8) . . . . ?
 C14 C13 C18 C19 89.2(7) . . . . ?
 C14 C13 C12 C11 2.0(11) . . . . ?
 C14 C8 C7 C6 -166.3(6) . . . . ?
 C14 C15 C16 O3 -72.6(8) . . . . ?
 C14 C15 C16 C17 47.6(9) . . . . ?
 C26 C8 C7 C6 73.0(7) . . . . ?
 C26 C8 C14 C13 -60.5(7) . . . . ?
 C26 C8 C14 C15 61.5(7) . . . . ?
 C26 C8 C14 C27 -178.9(5) . . . . ?
 C22 C17 C28 O4 -65.8(7) . . . . ?
 C22 C17 C16 O3 -56.1(7) . . . . ?
 C22 C17 C16 C15 -178.2(6) . . . . ?
 C22 C21 C20 C19 -54.4(8) . . . . ?
 C22 C21 C20 C30 68.2(8) . . . . ?
 C22 C21 C20 C29 -171.5(7) . . . . ?
 C7B C6B C26B O3B 170.2(6) . . . . ?
 C4 C5 C6 C7 165.0(6) . . . . ?
 C4 C5 C10 C9 -168.5(5) . . . . ?
 C4 C5 C10 C1 -52.6(7) . . . . ?
 C4 C5 C10 C25 66.3(7) . . . . ?
 C4 C3 C2 C1 55.3(8) . . . . ?
 C19B C18B C13B C14B -168.5(5) . . . . ?
 C19B C18B C13B C12B 61.2(7) . . . . ?
 C28B C14B C15B C16B 72.9(7) . . . . ?
 C28B C14B C9B C10B -60.4(7) . . . . ?
 C28B C14B C9B C8B 62.0(7) . . . . ?
 C28B C14B C9B C27B -178.5(6) . . . . ?
 C28B C14B C13B C12B 60.0(7) . . . . ?
 C28B C14B C13B C18B -71.9(7) . . . . ?
 C2B C1B C6B C5B -40.3(8) . . . . ?
 C2B C1B C6B C7B 84.6(7) . . . . ?
 C2B C1B C6B C26B -158.6(6) . . . . ?
 C27B C9B C8B C7B 77.2(7) . . . . ?
 C3 C4 C24 O2 63.8(8) . . . . ?
 C28 C17 C22 O5 70.5(7) . . . . ?
 C28 C17 C22 C21 -162.8(6) . . . . ?
 C28 C17 C16 O3 -174.9(6) . . . . ?
 C28 C17 C16 C15 63.0(8) . . . . ?
 C01L C18B C13B C14B 72.6(7) . . . . ?
 C01L C18B C13B C12B -57.7(7) . . . . ?
 C01L C18B C19B C20B -70.2(7) . . . . ?
 C23 C4 C3 O1 70.0(7) . . . . ?
 C23 C4 C3 C2 -168.0(6) . . . . ?
 C23 C4 C24 O2 -54.7(8) . . . . ?
 C19 C18 C17 C22 46.0(8) . . . . ?
 C19 C18 C17 C28 162.0(6) . . . . ?
 C19 C18 C17 C16 -79.6(7) . . . . ?
 C2 C1 C10 C9 167.4(6) . . . . ?
 C2 C1 C10 C5 52.2(8) . . . . ?
 C2 C1 C10 C25 -70.8(7) . . . . ?
 C16 C17 C22 O5 -49.2(8) . . . . ?
 C16 C17 C22 C21 77.5(8) . . . . ?
 C16 C17 C28 O4 56.6(8) . . . . ?
 C16 C15 C14 C13 -33.7(9) . . . . ?
 C16 C15 C14 C8 -154.2(6) . . . . ?
 C16 C15 C14 C27 82.0(8) . . . . ?
 C23B C22B C21B O5B 68.1(7) . . . . ?
 C23B C22B C21B C20B -168.1(6) . . . . ?
 C23B C22B C29B O6B -51.0(8) . . . . ?
 C25B C3B C2B O2B -54.0(7) . . . . ?
 C25B C3B C2B C1B 65.3(8) . . . . ?
 C11 C9 C8 C7 -177.6(6) . . . . ?
 C11 C9 C8 C14 -58.1(7) . . . . ?
 C11 C9 C8 C26 62.8(7) . . . . ?
 C11 C9 C10 C5 173.7(5) . . . . ?
 C11 C9 C10 C1 57.5(7) . . . . ?
 C11 C9 C10 C25 -60.6(7) . . . . ?
 C29B C22B C21B O5B -48.9(7) . . . . ?
 C29B C22B C21B C20B 74.9(7) . . . . ?
 C26B C6B C7B O4B -169.6(6) . . . . ?
 C26B C6B C7B C8B 66.1(7) . . . . ?
 C24 C4 C3 O1 -48.3(7) . . . . ?
 C24 C4 C3 C2 73.7(8) . . . . ?
 C24B C3B C2B O2B 65.9(7) . . . . ?
 C24B C3B C2B C1B -174.8(6) . . . . ?

_smtbx_masks_special_details       ?
loop_
  _smtbx_masks_void_nr
  _smtbx_masks_void_average_x
  _smtbx_masks_void_average_y
  _smtbx_masks_void_average_z
  _smtbx_masks_void_volume
  _smtbx_masks_void_count_electrons
  _smtbx_masks_void_content
 1 0.000 0.000 -0.358 419.3 137.7 ?
 2 0.500 0.500 -0.091 419.3 137.7 ?
 3 0.216 0.694 0.383 10.6 0.0 ?
 4 0.284 0.194 0.617 10.6 0.0 ?
 5 0.716 0.806 0.617 10.6 0.0 ?
 6 0.784 0.306 0.383 10.6 0.0 ?

_smtbx_masks_void_probe_radius     1.2
_smtbx_masks_void_truncation_radius  1.2
_shelx_res_file
;
TITL 2n2_a.res in P2(1)2(1)2
    2n2.res
    created by SHELXL-2018/3 at 15:52:41 on 26-Sep-2019
REM Old TITL 2N2 in P2(1)2(1)2
REM SHELXT solution in P2(1)2(1)2: R1 0.173, Rweak 0.056, Alpha 0.002
REM <I/s> 0.361 for 26 systematic absences, Orientation as input
REM Flack x = -0.001 ( 0.225 ) from 1870 Parsons' quotients
REM Formula found by SHELXT: C62 N6 O10
CELL 1.54184 11.705733 34.213626 14.736079 90 90 90
ZERR 8 0.000693 0.002756 0.000937 0 0 0
LATT -1
SYMM -X,-Y,+Z
SYMM 0.5-X,0.5+Y,-Z
SYMM 0.5+X,0.5-Y,-Z
SFAC C H O
UNIT 240 400 48

L.S. 20
PLAN  10
SIZE 0.09 0.11 0.13
CONF
BOND $h
list 4
MORE -1
fmap 2
acta
ABIN
REM <olex2.extras>
REM <HklSrc "%.\\2N2.hkl">
REM </olex2.extras>

WGHT    0.124900    2.698500
FVAR       1.67022
O1B   3    0.510338    0.042314    0.150401    11.00000    0.04738    0.04645 =
         0.04075   -0.00727   -0.00413   -0.00459
AFIX 147
H1B   2    0.461561    0.025193    0.154288    11.00000   -1.50000
AFIX   0
O5B   3    0.514340    0.404228    0.461251    11.00000    0.06169    0.04056 =
         0.04545   -0.00370   -0.00766    0.00234
AFIX 147
H5B   2    0.545752    0.409505    0.509456    11.00000   -1.50000
AFIX   0
O2B   3    0.690424    0.004298    0.237588    11.00000    0.03650    0.04609 =
         0.05908   -0.00911   -0.00324    0.00375
AFIX 147
H2B   2    0.753645    0.000400    0.215395    11.00000   -1.50000
AFIX   0
O4B   3    0.628179    0.123093    0.145080    11.00000    0.06031    0.05060 =
         0.03445   -0.00167    0.00842   -0.00595
AFIX 147
H4B   2    0.629363    0.111105    0.096905    11.00000   -1.50000
AFIX   0

O1    3    0.035184    0.920772    0.114747    11.00000    0.05458    0.04412 =
         0.04114   -0.00122    0.00749   -0.00240
AFIX 147
H1    2    0.096618    0.931854    0.107465    11.00000   -1.50000
AFIX   0
O4    3   -0.099587    0.582962    0.020254    11.00000    0.06225    0.06940 =
         0.02761   -0.00214   -0.00293   -0.00021
AFIX 147
H4    2   -0.041655    0.569819    0.013362    11.00000   -1.50000
AFIX   0
O6    3    0.113782    0.509968    0.281166    11.00000    0.05596    0.03558 =
         0.06950    0.00409   -0.00663    0.00183
AFIX 147
H6    2    0.176649    0.501188    0.294843    11.00000   -1.50000
AFIX   0
O5    3    0.056673    0.534429    0.103921    11.00000    0.07497    0.05645 =
         0.03484   -0.00296   -0.00025    0.00547
AFIX  83
H5    2    0.017148    0.542462    0.061934    11.00000   -1.50000
AFIX   0

O3B   3    0.346177    0.062518    0.345986    11.00000    0.04585    0.05941 =
         0.06322    0.00673    0.00253   -0.00793
AFIX 147
H3B   2    0.313474    0.044448    0.320271    11.00000   -1.50000
AFIX   0

O3    3    0.229242    0.607917    0.133632    11.00000    0.04807    0.06643 =
         0.08463    0.00976    0.01638    0.00478
AFIX  83
H3    2    0.279566    0.604937    0.095546    11.00000   -1.50000
AFIX   0
O2    3   -0.064189    0.904515   -0.044466    11.00000    0.07276    0.07550 =
         0.06660   -0.00096   -0.00771    0.00138
AFIX 147
H2    2   -0.047393    0.919569   -0.003274    11.00000   -1.50000
AFIX   0

C10B  1    0.539472    0.154564    0.367113    11.00000    0.02132    0.04451 =
         0.02556    0.00985   -0.00795   -0.00622
C9    1    0.010636    0.755604    0.171673    11.00000    0.02459    0.04669 =
         0.01903   -0.00726    0.00569   -0.00680
AFIX  13
H9    2    0.088200    0.759417    0.195084    11.00000   -1.20000
AFIX   0
C13   1    0.014644    0.670908    0.212821    11.00000    0.02015    0.04999 =
         0.02895    0.00141   -0.00098   -0.00471

C17B  1    0.467582    0.305998    0.350446    11.00000    0.03076    0.05216 =
         0.01698    0.00060    0.00092    0.00496
AFIX  13
H17B  2    0.545740    0.303334    0.327427    11.00000   -1.20000
AFIX   0

C5    1    0.055520    0.811444    0.069819    11.00000    0.02320    0.05205 =
         0.01766   -0.00184    0.00292   -0.00815
AFIX  13
H5A   2    0.130999    0.808662    0.097857    11.00000   -1.20000
AFIX   0

O6B   3    0.310912    0.403647    0.391194    11.00000    0.07169    0.07191 =
         0.10394   -0.00589   -0.01648    0.01730
AFIX 147
H6B   2    0.373033    0.414672    0.393674    11.00000   -1.50000
AFIX   0
C22B  1    0.452753    0.350982    0.364781    11.00000    0.04034    0.04212 =
         0.02568   -0.00150   -0.00003   -0.00743
C14B  1    0.452779    0.219330    0.320880    11.00000    0.03030    0.03682 =
         0.02461   -0.00093   -0.00331    0.00229

C8    1    0.024326    0.724808    0.095044    11.00000    0.03801    0.04757 =
         0.01439   -0.00438    0.00694   -0.00122
C11B  1    0.537176    0.167610    0.451938    11.00000    0.03653    0.03790 =
         0.02485    0.00691   -0.00282    0.00028
AFIX  43
H11B  2    0.545876    0.148928    0.497256    11.00000   -1.20000
AFIX   0
C12B  1    0.522313    0.208602    0.482719    11.00000    0.03989    0.04623 =
         0.02301    0.00221   -0.00268    0.00384
AFIX  23
H12A  2    0.587071    0.215764    0.520273    11.00000   -1.20000
H12B  2    0.454305    0.210145    0.520158    11.00000   -1.20000
AFIX   0
C21B  1    0.535535    0.364226    0.438806    11.00000    0.04046    0.03615 =
         0.03408   -0.00046   -0.00379    0.00123
AFIX  13
H21B  2    0.612967    0.362612    0.413800    11.00000   -1.20000
AFIX   0

C18   1    0.018789    0.628157    0.237119    11.00000    0.03158    0.05040 =
         0.02767   -0.00480    0.00782   -0.00832
AFIX  13
H18   2   -0.054554    0.622397    0.266265    11.00000   -1.20000
AFIX   0

C5B   1    0.561960    0.111629    0.348377    11.00000    0.02177    0.04552 =
         0.03174    0.00272   -0.00196   -0.00283
AFIX  13
H5BA  2    0.528957    0.097348    0.399719    11.00000   -1.20000
AFIX   0

C17   1    0.024808    0.601388    0.153742    11.00000    0.04193    0.04082 =
         0.03406   -0.00283    0.00671   -0.00407
C18B  1    0.465335    0.279530    0.435557    11.00000    0.03066    0.04137 =
         0.01788   -0.00111    0.00191   -0.00168
C1B   1    0.546770    0.053369    0.239195    11.00000    0.04043    0.04548 =
         0.02571   -0.00251   -0.00460   -0.01064
AFIX  13
H1BA  2    0.508392    0.035544    0.281392    11.00000   -1.20000
AFIX   0

C7    1    0.096106    0.742804    0.018259    11.00000    0.03586    0.04398 =
         0.03698   -0.00381    0.01349   -0.00084
AFIX  23
H7A   2    0.175098    0.744172    0.037895    11.00000   -1.20000
H7C   2    0.092931    0.725612   -0.034022    11.00000   -1.20000
AFIX   0

C15B  1    0.440420    0.250152    0.243822    11.00000    0.02777    0.04696 =
         0.03120    0.00453   -0.00575   -0.00027
AFIX  23
H15A  2    0.514821    0.254353    0.216531    11.00000   -1.20000
H15B  2    0.390584    0.239597    0.197290    11.00000   -1.20000
AFIX   0
C6B   1    0.501921    0.095321    0.262140    11.00000    0.02543    0.04175 =
         0.03807    0.00171   -0.01097   -0.00368
C9B   1    0.529965    0.183878    0.288448    11.00000    0.03784    0.03861 =
         0.02165    0.00347   -0.00445    0.00068
C4B   1    0.691523    0.102704    0.350315    11.00000    0.02806    0.03573 =
         0.04200    0.00211   -0.00287   -0.00006
AFIX  23
H4BA  2    0.728371    0.116873    0.301387    11.00000   -1.20000
H4BB  2    0.723102    0.112177    0.407059    11.00000   -1.20000
AFIX   0

C6    1    0.057963    0.783208   -0.010451    11.00000    0.04678    0.05497 =
         0.01835   -0.00319    0.00556   -0.00427
AFIX  23
H6A   2   -0.017720    0.781612   -0.037001    11.00000   -1.20000
H6C   2    0.109711    0.793136   -0.056406    11.00000   -1.20000
AFIX   0

C13B  1    0.511587    0.238567    0.404355    11.00000    0.03431    0.03762 =
         0.02171   -0.00129   -0.00977   -0.00022
AFIX  13
H13B  2    0.590307    0.243493    0.384820    11.00000   -1.20000
AFIX   0

C1    1   -0.017676    0.823955    0.227643    11.00000    0.03969    0.05056 =
         0.02865   -0.00365    0.00778   -0.00844
AFIX  23
H1A   2   -0.076136    0.817093    0.271489    11.00000   -1.20000
H1C   2    0.056132    0.819624    0.255826    11.00000   -1.20000
AFIX   0

C3B   1    0.719106    0.059429    0.340818    11.00000    0.02753    0.04544 =
         0.03860   -0.00071   -0.00157    0.00135
C15   1    0.109088    0.657030    0.060559    11.00000    0.04526    0.04384 =
         0.02493   -0.00301    0.01401   -0.00036
AFIX  23
H15C  2    0.046817    0.658926    0.017354    11.00000   -1.20000
H15D  2    0.178431    0.664333    0.028759    11.00000   -1.20000
AFIX   0
C10   1   -0.029020    0.796925    0.143653    11.00000    0.03287    0.04611 =
         0.01948   -0.00297    0.00494   -0.00193

C8B   1    0.478729    0.164898    0.203455    11.00000    0.05363    0.03900 =
         0.02165    0.00216   -0.00703    0.00042
AFIX  23
H8BA  2    0.497308    0.181338    0.151897    11.00000   -1.20000
H8BB  2    0.396261    0.165107    0.209872    11.00000   -1.20000
AFIX   0

C12   1   -0.047887    0.695355    0.264262    11.00000    0.03476    0.05972 =
         0.03004    0.00016    0.01438   -0.00898
AFIX  43
H12   2   -0.089474    0.684238    0.311437    11.00000   -1.20000
AFIX   0

C16B  1    0.393280    0.289229    0.274350    11.00000    0.05300    0.04085 =
         0.03397    0.00130   -0.01136    0.00126
AFIX  23
H16A  2    0.315566    0.285946    0.295886    11.00000   -1.20000
H16B  2    0.392008    0.307230    0.223505    11.00000   -1.20000
AFIX   0

C14   1    0.087912    0.687811    0.136092    11.00000    0.02766    0.04749 =
         0.02438   -0.00326    0.01108   -0.00092
C20B  1    0.532683    0.339348    0.525281    11.00000    0.05721    0.04526 =
         0.02325    0.00110   -0.00444    0.00142
AFIX  23
H20A  2    0.591267    0.348485    0.566719    11.00000   -1.20000
H20B  2    0.459233    0.342582    0.554817    11.00000   -1.20000
AFIX   0

C26   1   -0.092778    0.712719    0.056579    11.00000    0.04242    0.05400 =
         0.04071   -0.00137    0.00343   -0.00391
AFIX 137
H26C  2   -0.121089    0.733006    0.017598    11.00000   -1.50000
H26D  2   -0.145440    0.708662    0.105623    11.00000   -1.50000
H26E  2   -0.084807    0.688951    0.022537    11.00000   -1.50000
AFIX   0
C22   1    0.038102    0.558869    0.184003    11.00000    0.04045    0.04276 =
         0.02996   -0.00001    0.00273   -0.00433
AFIX  13
H22   2   -0.035825    0.551017    0.209338    11.00000   -1.20000
AFIX   0

C7B   1    0.515335    0.123030    0.180530    11.00000    0.03977    0.04591 =
         0.02569    0.00136   -0.00556    0.00033
AFIX  13
H7B   2    0.464539    0.113550    0.132465    11.00000   -1.20000
AFIX   0

C4    1    0.048057    0.855462    0.043882    11.00000    0.02960    0.04863 =
         0.03328   -0.00161    0.00302   -0.00192
C19B  1    0.551979    0.296268    0.505376    11.00000    0.04259    0.04437 =
         0.03077   -0.00218   -0.00942   -0.00104
AFIX  23
H19A  2    0.545865    0.281610    0.561510    11.00000   -1.20000
H19B  2    0.628826    0.292763    0.482132    11.00000   -1.20000
AFIX   0
C28B  1    0.332146    0.204904    0.346845    11.00000    0.03519    0.04124 =
         0.04517   -0.00445   -0.00482    0.00034
AFIX 137
H28A  2    0.286177    0.226760    0.365166    11.00000   -1.50000
H28B  2    0.337723    0.186617    0.396056    11.00000   -1.50000
H28C  2    0.297535    0.192366    0.295457    11.00000   -1.50000
AFIX   0
C2B   1    0.673627    0.046312    0.250623    11.00000    0.03723    0.04274 =
         0.04455   -0.00289   -0.00004   -0.00364
AFIX  13
H2BA  2    0.714496    0.060334    0.202572    11.00000   -1.20000
AFIX   0
C27B  1    0.652946    0.196509    0.263982    11.00000    0.03506    0.04257 =
         0.04732   -0.00160    0.00342    0.00173
AFIX 137
H27A  2    0.694190    0.174484    0.240408    11.00000   -1.50000
H27B  2    0.690704    0.206104    0.317350    11.00000   -1.50000
H27C  2    0.650326    0.216783    0.218994    11.00000   -1.50000
AFIX   0

C3    1    0.054637    0.879780    0.131182    11.00000    0.03280    0.04757 =
         0.03381   -0.00451    0.00234   -0.00643
AFIX  13
H3A   2    0.131830    0.876917    0.156053    11.00000   -1.20000
AFIX   0
C28   1   -0.091544    0.604671    0.104482    11.00000    0.04432    0.04955 =
         0.03158    0.00221   -0.00480    0.00327
AFIX  23
H28D  2   -0.150971    0.595547    0.145173    11.00000   -1.20000
H28E  2   -0.106372    0.632025    0.091807    11.00000   -1.20000
AFIX   0

C01L  1    0.346327    0.277659    0.482715    11.00000    0.03941    0.05432 =
         0.03938   -0.00007    0.00796    0.00401
AFIX 137
H01A  2    0.338223    0.299478    0.523166    11.00000   -1.50000
H01B  2    0.340161    0.253753    0.516471    11.00000   -1.50000
H01C  2    0.287272    0.278592    0.437563    11.00000   -1.50000
AFIX   0

C23   1    0.153596    0.865428   -0.015010    11.00000    0.05129    0.05024 =
         0.03222   -0.00323    0.00682   -0.00828
AFIX 137
H23D  2    0.159069    0.893255   -0.022165    11.00000   -1.50000
H23E  2    0.145814    0.853385   -0.073525    11.00000   -1.50000
H23F  2    0.221362    0.855827    0.014133    11.00000   -1.50000
AFIX   0
C19   1    0.111656    0.618736    0.309274    11.00000    0.04233    0.04895 =
         0.03460   -0.00095   -0.00606   -0.00778
AFIX  23
H19C  2    0.186167    0.624803    0.284151    11.00000   -1.20000
H19D  2    0.099976    0.635443    0.361639    11.00000   -1.20000
AFIX   0
C27   1    0.205826    0.697335    0.178167    11.00000    0.03162    0.05064 =
         0.03625    0.00605    0.00193   -0.00096
AFIX 137
H27D  2    0.195468    0.713015    0.231562    11.00000   -1.50000
H27E  2    0.251214    0.711439    0.134902    11.00000   -1.50000
H27F  2    0.243929    0.673459    0.194131    11.00000   -1.50000
AFIX   0
C2    1   -0.029238    0.867054    0.203574    11.00000    0.04033    0.04386 =
         0.04074   -0.00974    0.00122    0.00477
AFIX  23
H2A   2   -0.106353    0.872000    0.182393    11.00000   -1.20000
H2C   2   -0.017040    0.882611    0.257744    11.00000   -1.20000
AFIX   0
C21   1    0.125233    0.550214    0.255065    11.00000    0.04605    0.04715 =
         0.03919   -0.00027   -0.00831   -0.00052
AFIX  13
H21   2    0.201605    0.554338    0.229560    11.00000   -1.20000
AFIX   0
C16   1    0.120142    0.614766    0.088087    11.00000    0.04569    0.04556 =
         0.04764   -0.00383    0.01002   -0.00592
AFIX  13
H16   2    0.116994    0.598515    0.033380    11.00000   -1.20000
AFIX   0
C25   1   -0.155960    0.798141    0.113777    11.00000    0.03686    0.04554 =
         0.04091   -0.00206    0.00179    0.00234
AFIX 137
H25D  2   -0.189417    0.822478    0.132343    11.00000   -1.50000
H25E  2   -0.196571    0.776895    0.141529    11.00000   -1.50000
H25F  2   -0.160496    0.795801    0.048957    11.00000   -1.50000
AFIX   0
C20   1    0.110940    0.576331    0.340158    11.00000    0.04283    0.05284 =
         0.03833   -0.00194   -0.00508   -0.00467

C23B  1    0.484868    0.373345    0.275895    11.00000    0.06503    0.04708 =
         0.03150    0.00275   -0.00153    0.00253
AFIX 137
H23A  2    0.556981    0.363990    0.253739    11.00000   -1.50000
H23B  2    0.490348    0.400811    0.288485    11.00000   -1.50000
H23C  2    0.427004    0.368971    0.230861    11.00000   -1.50000
AFIX   0
C25B  1    0.669324    0.035451    0.423096    11.00000    0.03718    0.05199 =
         0.03692    0.00406    0.00359    0.00155
AFIX 137
H25A  2    0.699289    0.045707    0.478868    11.00000   -1.50000
H25B  2    0.690809    0.008493    0.417169    11.00000   -1.50000
H25C  2    0.587542    0.037545    0.423382    11.00000   -1.50000
AFIX   0

C11   1   -0.056912    0.738348    0.253000    11.00000    0.03462    0.05740 =
         0.02761   -0.00570    0.01539   -0.00239
AFIX  23
H11A  2   -0.030087    0.750746    0.308230    11.00000   -1.20000
H11C  2   -0.136888    0.745087    0.245784    11.00000   -1.20000
AFIX   0

C29B  1    0.327720    0.362540    0.389763    11.00000    0.03346    0.03506 =
         0.06225   -0.00566   -0.00606    0.00800
AFIX  23
H29A  2    0.275869    0.350986    0.345982    11.00000   -1.20000
H29B  2    0.309223    0.351917    0.448997    11.00000   -1.20000
AFIX   0
C26B  1    0.372573    0.092243    0.281832    11.00000    0.03888    0.04293 =
         0.03932    0.00614   -0.00864   -0.00330
AFIX  23
H26A  2    0.345425    0.117155    0.304685    11.00000   -1.20000
H26B  2    0.332509    0.086832    0.225598    11.00000   -1.20000
AFIX   0

C24   1   -0.060759    0.865638   -0.011975    11.00000    0.04801    0.04878 =
         0.04712    0.00374   -0.00601   -0.00105
AFIX  23
H24D  2   -0.065481    0.847979   -0.063335    11.00000   -1.20000
H24E  2   -0.127409    0.861147    0.025723    11.00000   -1.20000
AFIX   0

C24B  1    0.848260    0.054879    0.343892    11.00000    0.02633    0.04830 =
         0.08231    0.00198   -0.00185    0.00130
AFIX 137
H24A  2    0.882515    0.071789    0.299596    11.00000   -1.50000
H24B  2    0.868235    0.028256    0.330790    11.00000   -1.50000
H24C  2    0.875575    0.061718    0.403231    11.00000   -1.50000
AFIX   0

C30   1    0.002837    0.566480    0.390805    11.00000    0.07539    0.04289 =
         0.03522   -0.00345    0.00382   -0.01378
AFIX 137
H30A  2   -0.001257    0.581830    0.445241    11.00000   -1.50000
H30B  2    0.002969    0.539221    0.406257    11.00000   -1.50000
H30C  2   -0.062051    0.572113    0.353174    11.00000   -1.50000
AFIX   0
C29   1    0.213515    0.569990    0.402702    11.00000    0.09616    0.05942 =
         0.06115    0.01043   -0.03647   -0.01466
AFIX 137
H29C  2    0.281656    0.579038    0.373158    11.00000   -1.50000
H29D  2    0.220878    0.542653    0.416171    11.00000   -1.50000
H29E  2    0.202410    0.584298    0.458044    11.00000   -1.50000
AFIX   0
HKLF 4


REM  2n2_a.res in P2(1)2(1)2
REM wR2 = 0.2452, GooF = S = 1.025, Restrained GooF = 1.025 for all data
REM R1 = 0.0837 for 7214 Fo > 4sig(Fo) and 0.1161 for all 10735 data
REM 671 parameters refined using 0 restraints

END

WGHT      0.1234      1.8230

REM Highest difference peak  0.558,  deepest hole -0.369,  1-sigma level  0.069
Q1    1   0.9120 -0.0280  0.2230  11.00000  0.05    0.56
Q2    1   0.6234  0.4409  0.5990  11.00000  0.05    0.44
Q3    1   0.2023  0.9642  0.0262  11.00000  0.05    0.38
Q4    1   0.0672  0.9650 -0.1298  11.00000  0.05    0.35
Q5    1   0.2212  0.0672  0.4188  11.00000  0.05    0.34
Q6    1   0.2034  0.5425 -0.0459  11.00000  0.05    0.34
Q7    1   0.4579  0.3511  0.4149  11.00000  0.05    0.29
Q8    1   0.6340  0.4212  0.5783  11.00000  0.05    0.28
Q9    1   0.3021  0.0839  0.2056  11.00000  0.05    0.28
Q10   1   0.0675  0.6751  0.2019  11.00000  0.05    0.27
;
_shelx_res_checksum                12001
_shelx_hkl_file
;
   0   0   1 26615.7 255.277   7
   0   0   2 54044.0 610.352  12
   0   0   2 53738.9 510.637   7
   0   0   3 8943.11 257.273   7
   0   0   4 6318.36 261.725   7
   0   0   5 871.027 112.179   7
   0   0  -5 1208.55 104.044   9
   0   0   6 995.567 126.564   7
   0   0  -6 1741.68 156.003   9
   0   0   7 2238.99 213.422   7
   0   0  -8 54522.1 898.822   8
   0   0   8 53950.2 1139.75   7
   0   0   9 934.560 179.104   7
   0   0  10 13161.3 658.002   7
   0   0  11 5010.52 558.040   6
   0   0  11 1161.69 272.228   3
   0   0  12 340.992 196.940   6
   0   0  13 3072.94 449.946   6
   0   0  14 796.793 275.391   6
   0   0  15 302.589 176.539   6
   0   0  16 654.309 200.595   6
   0   1  -1 6094.89 102.714   8
   0  -1   1 6001.73 128.221   7
   0  -1   2 510.914 55.7482   7
   0   1   2 536.566 69.9593  12
   0   1   3 31632.5 568.522  12
   0  -1   3 30476.1 479.867   7
   0   1   3 31478.0 502.555   7
   0   1  -4 6553.58 198.063   9
   0   1   4 6274.63 308.642  12
   0  -1   4 6314.45 260.548   7
   0   1   4 6311.14 262.128   7
   0  -1   5 6905.41 305.964   7
   0   1   5 7068.50 307.206   7
   0  -1  -5 7407.15 189.976   9
   0   1  -5 7120.46 223.737   9
   0   1  -6 10180.6 301.931   9
   0  -1  -6 9951.94 239.800   9
   0  -1   6 9557.74 399.506   7
   0   1   6 9371.86 397.756   7
   0  -1   7 182.554 95.8950   7
   0   1  -7 574.632 90.8313   9
   0   1  -7 461.212 83.0668   8
   0   1   7 422.836 117.852   7
   0   1   8 10261.3 572.286   7
   0  -1   8 8967.71 580.012   7
   0  -1   9 3404.97 313.094   7
   0   1   9 3315.86 317.676   7
   0  -1  10 4598.79 398.609   7
   0   1  10 4922.21 419.686   7
   0  -1  11 7541.70 598.907   3
   0   1  11 8052.42 616.765   3
   0  -1  11 6839.99 629.355   6
   0   1  11 7040.42 508.537   7
   0   1  11 6660.43 591.896   6
   0   1  12 1411.41 296.347   6
   0  -1  12 1959.27 335.528   3
   0  -1  13 1544.76 353.124   6
   0   1  13 1125.15 294.594   6
   0  -1  14 1667.70 336.631   6
   0   1  14 1483.39 318.888   6
   0  -1  15 799.795 226.909   6
   0   1  15 760.457 224.771   6
   0  -1  16 875.443 236.608   6
   0   1  16 818.640 215.884   6
   0  -1  17-10.1724 85.8036   6
   0   2   0 509.150 32.9706   9
   0   2   0 509.704 33.5606   8
   0   2  -1 1100.92 48.4827   8
   0   2  -1 1094.21 58.6838   9
   0   2   1 1114.35 65.4509  11
   0   2  -2 28204.6 314.795   8
   0  -2   2 27580.2 384.284   7
   0   2   2 27059.9 462.890  12
   0  -2   3 12438.9 310.071   7
   0   2   3 12994.2 379.544  12
   0   2  -3 13002.8 255.252   8
   0  -2   4 33484.2 582.594   7
   0   2  -4 33942.2 478.617   8
   0   2   4 34211.7 693.375  12
   0   2  -4 34142.4 470.412   9
   0   2   4 35829.5 631.043   7
   0  -2   5 4670.00 246.823   7
   0   2   5 5427.19 322.924  12
   0   2  -5 4884.80 214.028   9
   0   2   5 4941.78 264.916   7
   0   2  -5 5046.01 208.256   8
   0  -2  -5 5086.55 143.652   9
   0  -2   6 10627.7 418.284   7
   0   2  -6 12173.9 347.866   9
   0   2  -6 11201.7 340.585   8
   0   2   6 11038.3 436.387   7
   0  -2  -6 11049.5 222.845   9
   0   2  -7 1510.41 136.032   8
   0  -2   7 1427.15 170.567   7
   0   2   7 1342.84 177.983   7
   0   2  -7 1470.86 127.505   9
   0  -2   8 1354.64 170.977   7
   0   2   8 1845.80 235.014   7
   0  -2   9 1904.13 263.995   7
   0   2   9 2052.84 254.646   7
   0   2  10 1598.37 265.030   7
   0   2  11 3851.02 410.982   7
   0  -2  11 1795.19 337.940   3
   0   2  11 3592.16 458.727   6
   0   2  11 1965.12 437.389  13
   0  -2  11 4101.29 511.733   6
   0  -2  12 451.444 205.744   3
   0   2  12 447.153 210.631   6
   0  -2  12 472.805 206.599   6
   0  -2  13 35.7202 186.101   6
   0   2  13 93.2186 168.701   6
   0   2  14 1757.72 346.960   6
   0  -2  14 1306.76 325.477   6
   0   2  15 278.744 168.086   6
   0  -2  15 528.721 208.721   6
   0  -2  16 841.426 229.622   6
   0  -2  17 68.5792 97.5744   6
   0   3   0-4.29125 19.9037   9
   0   3   0 4.11228 15.1691   8
   0   3  -1 577.250 52.9899   9
   0   3  -1 574.931 43.2510   8
   0   3   1 491.912 51.4221  11
   0  -3   1 650.989 67.7793   1
   0   3   2 1669.33 125.669  12
   0   3  -2 1697.14 80.6498   8
   0   3  -2 1750.61 95.1942   9
   0  -3   3 1698.26 121.699   7
   0   3  -3 1922.95 103.535   8
   0   3   3 1755.00 151.783  12
   0   3  -3 1687.97 104.408   9
   0   3  -4 1858.26 130.486   9
   0  -3   4 1961.90 152.027   7
   0   3   4 2056.59 187.320  12
   0   3   4 1917.26 163.037   7
   0   3  -4 1818.11 116.383   8
   0   3  -5 17128.1 397.654   9
   0   3   5 17620.7 574.783  12
   0   3  -5 18512.8 393.381   8
   0   3   5 18695.4 523.394   7
   0  -3   5 17575.2 475.420   7
   0  -3  -5 17187.3 220.903   9
   0  -3   6 25277.6 635.960   7
   0   3   6 26505.7 785.462  12
   0   3  -6 25535.3 520.787   9
   0   3   6 25412.8 670.878   7
   0   3  -6 26498.7 508.531   8
   0   3  -7 624.333 109.414   9
   0  -3   7 556.806 102.329   7
   0   3   7 396.655 114.798   7
   0   3  -7 687.896 91.9874   8
   0   3   8 800.879 151.275   7
   0   3   9 1719.46 236.569   7
   0   3  10 5060.33 416.936   7
   0   3  11 4288.29 548.629  13
   0   3  11 4647.15 490.891   6
   0  -3  11 4741.68 484.222   3
   0  -3  11 4193.40 487.509   6
   0   3  11 3965.51 395.543   7
   0   3  12 1805.53 384.574   6
   0   3  12 1775.56 351.767   7
   0  -3  12 1440.93 326.041   3
   0  -3  12 1891.04 390.067   6
   0   3  13 393.790 191.052   6
   0  -3  13 406.735 184.558   6
   0   3  14 2367.21 377.019   6
   0  -3  14 2273.41 393.654   6
   0  -3  15 391.485 201.968   6
   0  -3  16 79.7118 144.064   6
   0  -3  17-2.82980 104.956   6
   0   4   0 17420.9 254.340   9
   0   4   0 18248.8 266.717   8
   0  -4   1 2198.68 130.863   1
   0   4  -1 2102.68 90.5177   8
   0   4  -1 1993.76 99.9784   9
   0   4  -2 6171.15 160.383   8
   0   4   2 6464.70 249.666  12
   0   4  -2 6215.91 189.978   9
   0   4   2 6040.97 214.743  11
   0   4  -3 3144.77 154.645   9
   0   4   3 3347.64 209.866  12
   0   4  -3 3298.93 133.845   8
   0   4  -4 46988.4 558.844   8
   0   4   4 47906.1 864.153  12
   0   4  -5 2187.40 131.857   8
   0   4  -5 2254.74 170.882   9
   0   4   5 1872.14 196.146  12
   0   4   5 2307.13 191.771   7
   0   4  -6 12224.4 337.767   8
   0   4  -6 12330.1 387.136   9
   0   4   6 12272.0 539.525  12
   0   4   6 12262.8 480.063   7
   0   4  -7 136.490 84.1109   9
   0   4  -7 33.2018 30.7646   8
   0   4   7 62.7065 73.8950   7
   0   4   8 134.152 79.1875   7
   0   4   9 225.546 129.485   7
   0   4  10 891.297 224.104   7
   0   4  11 2873.26 351.413   7
   0   4  11 2483.35 443.357  13
   0  -4  11 2315.59 337.931   3
   0  -4  11 2660.34 415.144   6
   0   4  12 10487.8 870.569  13
   0  -4  12 12660.8 823.327   3
   0  -4  12 10617.2 800.951   6
   0   4  12 10395.0 660.773   7
   0  -4  13 195.049 231.667   6
   0  -4  13 461.455 212.685   3
   0  -4  14 2275.74 430.294   6
   0  -4  15 568.549 177.955   6
   0  -4  16-93.6955 120.595   6
   0  -4  17 192.141 117.608   6
   0   5   0 29.6089 32.9212   8
   0   5   0-0.77261 34.7503   9
   0   5  -1 1886.70 110.575   9
   0  -5   1 2122.76 142.745   1
   0   5  -1 2002.89 98.8040   8
   0   5   2 1122.13 107.177  11
   0   5  -2 1254.02 82.0299   8
   0   5  -2 1098.51 92.9676   9
   0   5  -3 16377.2 361.892   9
   0   5   3 17164.7 478.401  12
   0   5  -3 17081.5 309.957   8
   0   5   4 4939.10 293.460  12
   0   5  -4 4578.69 219.706   9
   0   5  -4 4712.55 178.903   8
   0   5   5 19879.6 632.995  12
   0   5  -5 18906.8 466.063   9
   0   5  -5 19826.9 397.065   8
   0   5  -6 1279.94 108.212   8
   0   5  -6 1458.11 156.289   9
   0   5   6 1233.06 166.673   7
   0   5   6 1352.92 198.746  12
   0   5   7 1219.70 201.394  12
   0   5   7 1012.81 165.897   7
   0   5  -7 1172.18 108.705   8
   0   5  -7 1329.57 157.321   9
   0   5   8 117.685 93.3124   7
   0   5   9 218.780 110.726   7
   0   5  10 2779.79 320.138   7
   0  -5  11 860.121 221.220   3
   0   5  11 1372.41 250.769   7
   0   5  11 1310.99 329.141  13
   0  -5  11 1508.91 326.578   6
   0   5  12 11931.5 719.587   7
   0   5  12 11294.3 936.677  13
   0  -5  12 11987.2 864.284   6
   0  -5  12 12605.2 835.757   3
   0  -5  13 1854.44 363.123   6
   0  -5  13 2064.50 355.146   3
   0  -5  14 5984.62 608.486   6
   0  -5  15 241.975 174.740   6
   0  -5  16-96.4888 104.002   6
   0  -5  17-7.82556 89.2482   6
   0   6   0 42183.6 489.455   9
   0   6   0 44005.6 507.280   8
   0   6  -1 1281.58 90.6376   8
   0   6  -1 1284.04 107.379   9
   0  -6   1 1342.85 130.096   1
   0   6   2 5183.32 214.888  11
   0   6  -2 5623.68 180.761   8
   0   6  -2 5247.91 209.329   9
   0   6  -3 15564.1 311.464   8
   0   6   3 15541.7 474.893  12
   0   6   3 15173.4 412.363  11
   0   6  -3 15114.0 369.866   9
   0   6  -4 31912.4 579.446   9
   0   6  -4 32634.5 478.394   8
   0   6   4 33478.9 774.601  12
   0   6  -5 495.895 57.8205   8
   0   6   5 575.226 139.113  12
   0   6  -5 687.850 114.300   9
   0   6   6 3337.26 272.436   7
   0   6  -6 3536.41 235.630   9
   0   6   6 3514.77 299.155  12
   0   6  -6 3470.77 172.892   8
   0   6  -7 7091.53 337.651   9
   0   6  -7 7136.95 264.395   8
   0   6   7 7231.17 409.390   7
   0   6   7 7592.06 472.205  12
   0   6   8 4468.11 344.692   7
   0   6   9 8.44434 69.8776   7
   0   6  10 124.646 118.967   7
   0  -6  11 29.6182 197.155   6
   0  -6  11 111.673 125.210   3
   0   6  11 303.039 209.019  13
   0   6  11 210.773 123.053   7
   0   6  12 8567.22 607.453   7
   0   6  12 9246.34 831.535  13
   0  -6  12 7893.02 711.251   6
   0  -6  12 9624.77 733.960   3
   0  -6  13 687.217 263.819   6
   0  -6  13 1196.63 289.625   3
   0  -6  14 7380.59 675.518   6
   0  -6  15-68.7511 117.961   6
   0  -6  16 85.4958 136.736   6
   0  -6  17 195.500 109.593   6
   0   7   0 37.5230 55.2404   9
   0   7  -1 5349.27 210.385   9
   0  -7   1 5155.20 260.937   1
   0   7  -1 5281.65 193.277   8
   0   7  -2 31641.8 452.155   8
   0   7   2 31749.5 552.707  11
   0   7  -2 31071.7 520.774   9
   0  -7   2 31601.9 643.381   1
   0   7  -3 248.025 60.7218   8
   0   7   3 56.6942 86.2231  11
   0   7   3 132.975 78.6351  12
   0   7  -3 134.284 74.3277   9
   0   7  -4 47245.2 593.936   8
   0   7  -4 46719.8 732.162   9
   0   7   4 48785.8 945.974  12
   0   7  -5 13438.7 423.427   9
   0   7  -5 13154.6 332.822   8
   0   7   5 13114.3 535.529  12
   0   7  -6 10627.3 403.069   9
   0   7  -6 10647.6 308.994   8
   0   7   6 10781.7 533.107  12
   0   7  -7 10089.0 313.731   8
   0   7  -7 10432.5 431.350   9
   0   7   7 9513.40 532.968  12
   0   7   7 9765.05 492.405   7
   0   7   8 583.041 153.425   7
   0   7   8 465.949 153.877  12
   0   7   9 558.119 146.922   7
   0  -7  10 4.99884 88.9133   3
   0  -7  10-63.8060 139.143   6
   0   7  10 85.9216 120.068  13
   0   7  10 24.7408 81.7786   7
   0   7  11 79.5085 175.146  13
   0  -7  11 377.157 169.470   3
   0   7  11 291.308 143.759   7
   0  -7  11 174.256 182.107   6
   0   7  12 979.283 239.687   7
   0  -7  12 613.030 238.242   3
   0  -7  12 617.846 246.504   6
   0   7  12 396.042 286.712  13
   0   7  13 174.284 225.302  13
   0  -7  13 557.987 244.019   6
   0  -7  13 273.550 175.523   3
   0  -7  14 1134.13 366.935   3
   0  -7  14 892.940 312.324   6
   0  -7  15 605.712 254.508   6
   0  -7  16 93.6230 121.509   6
   0  -7  17 23.9760 101.728   6
   0   8   0 12177.7 311.281   9
   0  -8   1 22399.5 566.915   1
   0   8  -1 22362.8 442.812   9
   0   8  -1 22890.2 419.963   8
   0   8   2 1907.92 163.556  11
   0   8  -2 1930.56 151.570   9
   0   8  -2 1869.01 124.020   8
   0  -8   2 1960.72 176.935   1
   0   8  -3 2112.50 133.671   8
   0   8   3 1995.26 171.034  11
   0   8  -3 1907.52 157.110   9
   0   8  -4 8667.66 267.070   8
   0   8  -4 8535.59 333.433   9
   0   8   4 8041.38 405.382  12
   0   8  -5 3780.29 183.567   8
   0   8   5 4008.44 315.653  12
   0   8  -5 3766.40 243.700   9
   0   8  -6 522.823 119.215   9
   0   8   6 588.798 160.126  12
   0   8  -6 552.188 77.8688   8
   0   8  -7 12219.0 474.373   9
   0   8   7 10742.5 520.211   7
   0   8   7 11496.1 586.982  12
   0   8   8 31.7622 75.3705   7
   0   8   8 118.782 82.9722  12
   0   8   9-116.711 89.6347   7
   0  -8  10 1121.22 249.138   6
   0   8  10 955.557 205.956   7
   0   8  10 1270.44 321.183  13
   0  -8  10 849.231 216.723   3
   0   8  11 144.308 127.373  13
   0  -8  11 98.2517 112.766   3
   0   8  11 65.0217 104.777   7
   0  -8  11 199.048 127.928   6
   0   8  12 9.75449 100.307   7
   0  -8  12 155.454 136.147   3
   0   8  12 217.455 205.090  13
   0  -8  12 60.9242 170.430   6
   0  -8  13 1989.54 358.488   6
   0   8  13 2924.43 491.683  13
   0  -8  13 2824.08 402.819   3
   0  -8  14 195.083 168.835   3
   0  -8  14 54.9366 187.431   6
   0  -8  15 1965.49 351.928   6
   0  -8  16-20.7604 121.520   6
   0  -8  17-74.3311 89.5096   6
   0  -9   0 152.120 101.054   1
   0  -9   1 23772.4 623.701   1
   0   9  -1 23608.8 459.007   8
   0   9  -1 22982.5 481.176   9
   0   9  -2 1713.40 129.421   8
   0  -9   2 1898.82 196.153   1
   0   9  -2 1781.03 153.942   9
   0   9  -3 22658.0 439.796   8
   0   9  -3 22754.8 525.243   9
   0   9   3 22250.9 559.942  11
   0   9  -4 6161.08 236.555   8
   0   9  -4 6033.64 291.315   9
   0   9   4 6079.32 367.448  12
   0   9   5 50693.8 1115.10  12
   0   9  -5 51643.7 891.939   9
   0   9  -5 51436.0 687.818   8
   0   9  -6 9066.71 295.953   8
   0   9   6 8688.68 498.369  12
   0   9  -6 8540.75 389.588   9
   0   9   7 885.477 179.801   7
   0   9   7 887.764 186.003  12
   0   9   8-16.3517 115.333  12
   0   9   8 20.2480 72.2399   7
   0   9   9 1218.64 210.231   7
   0  -9  10 205.170 164.789   6
   0  -9  10 9.18607 82.2801   3
   0   9  10 104.483 159.440  13
   0   9  10 39.5844 78.6452   7
   0   9  11 634.197 175.802   7
   0   9  11 256.861 216.558  13
   0  -9  11 482.247 157.496   6
   0  -9  11 527.187 191.466   3
   0  -9  12 257.925 154.513   6
   0  -9  12 468.419 184.669   3
   0   9  12 398.363 246.245  13
   0   9  13 194.666 196.373  13
   0  -9  13 3.61309 123.711   3
   0  -9  13-20.4365 156.323   6
   0  -9  14 1670.59 319.032   6
   0  -9  14 2486.35 374.648   3
   0  -9  15 530.720 198.536   6
   0  -9  16-7.08022 135.099   6
   0  -9  17 211.067 118.567   6
   0 -10   0 3208.36 256.580   1
   0  10  -1 138.285 76.4983   9
   0 -10  -1 94.5318 76.5877   1
   0 -10   1 268.552 125.911   1
   0  10  -1 195.591 62.5256   8
   0  10  -2 309.730 88.8384   9
   0  10   2 418.066 100.519  11
   0 -10   2 342.305 113.298   1
   0  10  -2 432.170 77.3608   8
   0  10  -3 6346.22 296.454   9
   0  10   3 6514.07 320.232  11
   0  10  -3 6301.33 248.322   8
   0  10  -4 328.102 106.590   9
   0  10   4 330.166 115.398  11
   0  10   4 455.625 117.582  12
   0  10  -4 403.237 73.2021   8
   0  10   5 111784. 1687.21  12
   0  10  -5 110575. 1340.71   9
   0  10  -5 109146. 1038.78   8
   0  10  -6 2318.60 227.667   9
   0  10  -6 2486.21 163.362   8
   0  10   6 2245.57 270.298  12
   0 -10  -7 7618.39 474.672   1
   0  10   7 7578.17 513.661  12
   0  10   8 810.117 181.725   7
   0  10   8 499.820 156.113  12
   0  10   9 1039.29 192.233   7
   0  10   9 886.402 210.147  12
   0 -10  10 112.232 138.661   6
   0  10  10-37.0328 106.022   7
   0  10  10 331.424 182.854  13
   0  10  11 64.0931 91.6997   7
   0 -10  11 152.496 120.923   3
   0  10  11 312.579 190.785  13
   0 -10  11 93.9988 152.628   6
   0 -10  12 406.938 188.939   6
   0  10  12 802.496 270.384  13
   0 -10  12 773.675 242.144   3
   0 -10  13 746.259 221.838   3
   0 -10  13 1024.18 286.866   6
   0  10  13 549.270 211.581  13
   0 -10  14 2518.88 369.563   3
   0 -10  14 2255.03 377.038   6
   0 -10  15 539.868 195.178   6
   0 -10  16 668.343 183.505   6
   0 -10  17 361.190 144.579   6
   0 -11   0 51.6928 118.861   1
   0 -11  -1 72.9514 88.2218   1
   0 -11   1 75.9687 116.260   1
   0  11  -1 93.6942 79.3508   9
   0  11  -1 81.3083 60.8487   8
   0  11  -2 216.004 73.0818   8
   0 -11   2 185.702 114.134   1
   0  11  -2 266.705 86.9974   9
   0  11   3 18663.4 556.117  11
   0  11  -3 17775.4 438.161   8
   0  11  -3 18687.7 518.232   9
   0  11   4 6312.75 395.953  12
   0  11  -4 6089.72 256.406   8
   0  11  -4 6763.18 330.876   9
   0  11   4 6344.84 351.242  11
   0  11  -5 38811.9 646.825   8
   0  11  -5 39823.1 845.111   9
   0  11   5 41212.0 1059.85  12
   0  11   6 6858.26 467.985  12
   0  11  -6 6772.15 379.655   9
   0  11  -6 6750.58 282.972   8
   0 -11  -7 28013.4 931.030   1
   0  11   7 30115.3 1019.94  12
   0  11   8 3654.97 378.956  12
   0  11   8 4034.39 370.604   7
   0  11   9 850.387 192.902   7
   0  11   9 572.324 176.851  12
   0  11  10 1601.16 261.006   7
   0 -11  10 2102.45 359.675   6
   0  11  10 2227.37 403.973  13
   0 -11  11 163.746 111.018   3
   0  11  11 158.537 93.2890   7
   0 -11  11 403.193 214.377   6
   0  11  11 280.556 129.891  13
   0 -11  12 3674.89 481.158   6
   0 -11  12 2818.94 407.354   3
   0  11  12 3193.74 495.005  13
   0 -11  13-18.3029 123.860   3
   0  11  13 31.1955 150.632  13
   0 -11  13-0.43670 155.325   6
   0 -11  14 2179.18 341.063   3
   0 -11  14 1608.17 310.141   6
   0 -11  15-125.691 164.211   6
   0 -11  16-135.316 132.793   6
   0 -11  17 489.783 156.928   6
   0 -12   0 124165. 1692.84   1
   0 -12  -1 16948.5 640.739   1
   0 -12   1 16740.2 628.789   1
   0  12  -2 1405.85 162.809   9
   0 -12   2 1363.70 192.138   1
   0 -12  -2 1362.96 202.226   1
   0  12  -2 1246.69 129.601   8
   0  12  -3 2175.50 198.308   9
   0  12  -3 2195.62 169.885   8
   0  12   3 2357.40 215.098  11
   0  12  -4 5493.04 315.584   9
   0  12  -4 5798.54 264.859   8
   0  12   4 5677.48 331.824  11
   0  12   4 5887.44 398.379  12
   0  12  -5 20261.8 622.263   9
   0  12  -5 20877.5 493.731   8
   0  12   5 21642.5 791.798  12
   0  12  -6 4621.14 242.717   8
   0  12   6 4508.73 388.103  12
   0 -12  -6 4740.84 405.905   1
   0 -12  -7 5720.06 440.874   1
   0  12   7 6049.95 482.556  12
   0  12   8 1142.26 213.316  12
   0 -12  -8 1239.01 223.958   1
   0  12   8 1248.39 217.785   7
   0  12   9 35.2650 145.673  13
   0  12   9 36.4688 97.4208  12
   0  12   9-1.05686 92.7011   7
   0  12  10 507.861 156.699   7
   0  12  10 794.454 287.674  13
   0 -12  10 557.690 202.148   6
   0 -12  11 269.124 152.398   3
   0  12  11 618.697 263.365  13
   0  12  11 458.158 159.904   7
   0 -12  11 415.458 213.980   6
   0  12  12 3994.06 566.463  13
   0 -12  12 3422.85 441.972   3
   0 -12  12 3433.15 478.618   6
   0  12  13 1060.32 322.363  13
   0 -12  13 941.198 245.364   3
   0 -12  13 1095.58 271.673   6
   0  12  14 1200.25 339.629  13
   0 -12  14 833.028 254.539   6
   0 -12  14 1221.60 252.676   3
   0 -12  15 241.383 165.251   6
   0 -12  16 144.221 122.941   6
   0 -12  17 243.318 108.341   6
   0 -13   0 92.4287 111.534   1
   0 -13   1 714.607 167.693   1
   0 -13  -1 774.712 181.219   1
   0 -13  -2 3158.00 313.981   1
   0  13  -2 3283.74 215.062   8
   0 -13   2 3086.24 290.169   1
   0  13   3 6494.92 361.304  11
   0 -13  -3 7027.68 447.368   1
   0  13  -3 6863.00 347.736   9
   0  13  -3 6651.67 299.688   8
   0 -13  -4 435.633 169.669   1
   0  13   4 437.943 118.722  11
   0  13   4 262.501 122.186  12
   0  13  -4 361.481 81.5999   8
   0  13  -4 453.971 130.555   9
   0 -13  -5 4862.61 413.478   1
   0  13  -5 5136.50 256.131   8
   0  13   5 4628.88 383.189  12
   0  13  -6 4026.15 235.897   8
   0 -13  -6 3955.73 378.855   1
   0  13   6 4155.39 393.221  12
   0 -13  -7 5178.17 438.744   1
   0  13   7 6008.59 487.654  12
   0  13   8 5499.53 453.135   7
   0 -13  -8 6654.33 499.119   1
   0  13   8 5835.33 496.022  12
   0  13   9 1878.68 279.407   7
   0  13   9 1687.51 292.220  12
   0  13   9 1531.95 327.663  13
   0 -13   9 1868.51 326.455   6
   0  13  10-27.4351 103.877   7
   0 -13  10-62.7928 149.986   6
   0  13  10 31.0309 125.811  13
   0 -13  11 1404.95 295.762   3
   0  13  11 1333.94 248.291   7
   0  13  11 1657.11 357.551  13
   0 -13  11 1343.27 328.501   6
   0  13  12 353.560 240.656  13
   0 -13  12 135.708 135.926   3
   0 -13  12-35.9482 149.058   6
   0  13  13 29.2194 173.075  13
   0 -13  13 238.669 150.613   3
   0 -13  13-30.1834 145.665   6
   0 -13  14 183.349 128.434   3
   0 -13  14 39.0935 126.799   6
   0  13  14 105.121 135.992  13
   0 -13  15 1834.26 305.072   6
   0 -13  16 229.283 134.464   6
   0 -14   0 2423.04 277.572   1
   0 -14   1 37090.1 1028.77   1
   0 -14  -1 38916.7 1054.56   1
   0 -14  -2 37233.8 1045.40   1
   0 -14   2 37073.5 1021.84   1
   0  14  -3 24793.3 590.993   8
   0  14   3 26279.2 758.974  11
   0 -14  -3 26116.0 898.840   1
   0  14  -4 1658.79 161.636   8
   0  14   4 1769.01 214.206  11
   0 -14  -4 2086.72 278.265   1
   0  14  -5 1671.08 158.333   8
   0 -14  -5 1755.96 260.429   1
   0  14   5 1597.43 241.902  12
   0  14   6 4497.01 408.852  12
   0  14  -6 4349.48 251.959   8
   0 -14  -6 4288.47 400.852   1
   0 -14  -7 3543.87 374.171   1
   0  14   7 3761.82 393.909  12
   0  14   8 92.9252 88.3050  12
   0 -14  -8 192.628 118.683   1
   0 -14   9 225.024 207.975   6
   0  14   9 177.725 146.205   7
   0  14   9 229.522 142.356  13
   0  14   9 109.123 134.369  12
   0 -14  10 1378.47 292.507   6
   0  14  10 2009.74 384.886  13
   0  14  10 1706.23 295.630   7
   0  14  11 470.407 232.320  13
   0  14  11 212.666 123.394   7
   0 -14  11 379.010 218.168   6
   0 -14  12 191.755 143.831   3
   0 -14  12-13.4823 171.956   6
   0  14  12 54.5558 120.868  13
   0 -14  13 448.876 158.375   3
   0 -14  13 568.103 207.844   6
   0  14  13 501.712 199.584  13
   0  14  14 205.382 174.674  13
   0 -14  14 274.453 159.653   3
   0 -14  14-1.88248 121.428   6
   0 -14  15 467.588 174.710   3
   0 -14  15 279.738 148.645   6
   0 -14  16 620.600 173.669   6
   0 -15   0-40.9003 122.568   1
   0 -15   1 361.586 147.236   1
   0 -15  -1 490.242 163.663   1
   0 -15  -2 57490.3 1361.85   1
   0 -15   2 56330.3 1325.82   1
   0  15   3 16264.0 606.713  11
   0 -15  -3 14841.1 719.104   1
   0  15  -4 4913.39 280.708   8
   0  15   4 5288.27 362.930  11
   0 -15  -4 5267.76 446.464   1
   0  15  -5 5727.82 296.964   8
   0  15   5 5161.37 430.276  12
   0 -15  -5 5847.31 474.317   1
   0  15   6 4161.23 408.826  12
   0 -15  -6 4083.09 414.708   1
   0  15   7 830.073 195.981  12
   0 -15  -7 969.551 219.991   1
   0 -15  -8 6938.08 542.435   1
   0  15   8 7413.38 620.362  12
   0 -15   9 702.580 247.454   6
   0  15   9 843.187 215.798   7
   0  15   9 1001.80 230.726  12
   0  15   9 585.983 206.244  13
   0  15  10 1062.81 234.731  12
   0  15  10 875.954 221.729   7
   0  15  10 1110.20 305.936  13
   0 -15  10 1076.52 262.362   6
   0 -15  11 350.546 231.274   6
   0  15  11-21.3157 183.669  13
   0  15  12 838.841 296.405  13
   0 -15  12 907.656 233.097   3
   0 -15  12 616.427 223.220   6
   0  15  13 6.11084 115.841  13
   0 -15  13-46.4432 132.173   6
   0 -15  13-103.590 158.278   3
   0 -15  14 269.008 139.782   3
   0  15  14 5.06303 129.052  13
   0 -15  14 124.613 148.708   6
   0 -15  15 287.907 115.627   3
   0 -15  15 70.1378 107.254   6
   0 -15  16 39.1784 92.5041   6
   0 -16   0-43.2066 135.794   1
   0 -16  -1 166.385 147.364   1
   0 -16   1 27.6829 113.670   1
   0 -16  -2 106489. 1935.30   1
   0 -16   2 104653. 1882.09   1
   0 -16  -3 193.155 149.101   1
   0  16   3 254.696 112.510  11
   0  16   4 557.882 139.632  11
   0 -16  -4 635.377 186.852   1
   0  16  -5 4516.87 271.942   8
   0  16   5 4752.82 428.241  12
   0 -16  -5 4638.67 432.259   1
   0  16   6 145.325 134.889  12
   0 -16  -6 247.484 149.063   1
   0 -16  -7 470.645 193.159   1
   0  16   7 473.765 168.572  12
   0  16   8 1487.17 285.594  12
   0 -16  -8 1549.68 264.335   1
   0 -16   8 1552.30 223.844   4
   0  16   9 329.528 185.481  13
   0 -16   9 433.939 194.108   6
   0  16   9 376.035 137.326   7
   0  16   9 181.925 118.119  12
   0  16  10 127.984 155.306  13
   0  16  10-252.552 210.893  12
   0  16  10-60.8312 115.330   7
   0  16  10-19.1863 130.076   5
   0 -16  10 232.144 166.426   6
   0  16  11 187.529 234.314  13
   0 -16  11-147.977 156.556   6
   0 -16  12 4058.06 499.096   6
   0  16  12 4410.07 589.361  13
   0 -16  12 4126.66 476.448   3
   0 -16  13 81.4149 89.6440   3
   0  16  13 86.0550 126.102  13
   0 -16  13-32.9210 132.765   6
   0 -16  14 149.903 134.035   6
   0 -16  14-32.6946 94.7686   3
   0  16  14 20.5487 131.395  13
   0 -16  15 315.177 170.243   6
   0 -16  15 365.543 143.553   3
   0 -16  16 117.733 92.7838   6
   0 -17   0 100.425 116.644   1
   0 -17  -1 6644.08 501.354   1
   0 -17   1 6825.69 501.124   1
   0 -17   2 4486.85 421.612   1
   0 -17  -2 4722.68 434.144   1
   0 -17  -3 10228.1 637.438   1
   0  17   3 10441.3 515.600  11
   0  17   4 563.797 139.910  11
   0 -17  -4 250.782 139.493   1
   0 -17  -5 3970.88 433.448   1
   0  17   5 3922.17 396.267  12
   0 -17  -6 2709.81 345.554   1
   0  17   6 2757.97 354.979  12
   0 -17  -7 868.357 218.969   1
   0  17   7 1277.35 259.570  12
   0 -17   8 60.9830 165.850   6
   0 -17  -8 41.5542 101.103   1
   0  17   8 283.861 142.440  12
   0 -17   8 90.0894 102.818   4
   0  17   9 503.125 250.277  13
   0  17   9 404.442 162.820   7
   0 -17   9 456.358 165.129   6
   0  17   9 276.716 124.666  12
   0  17  10-10.0540 108.556   5
   0  17  10 4.20156 116.978  12
   0  17  10 29.5458 98.3828   7
   0  17  10 146.141 131.734  13
   0  17  11 1356.68 324.332  13
   0 -17  11 1071.92 281.350   6
   0  17  12 279.340 242.801  13
   0 -17  12 11.5714 123.401   6
   0 -17  12 23.2900 110.683   3
   0 -17  13 34.6092 123.033   6
   0  17  13 178.201 171.442  13
   0 -17  13 60.9909 102.169   3
   0  17  14 67.7104 114.034  13
   0 -17  14-168.976 162.531   6
   0 -17  14 89.1258 100.671   3
   0 -17  15 117.871 108.493   3
   0 -17  15 200.004 140.434   6
   0 -18   0 322.688 161.526   1
   0 -18  -1 12119.2 699.895   1
   0 -18   1 11848.6 684.542   1
   0  18   2 4340.70 348.003  11
   0 -18  -2 3618.28 395.708   1
   0 -18  -3 2878.70 361.760   1
   0  18   3 3314.66 307.495  11
   0  18   4 674.579 145.031  11
   0 -18  -4 856.733 235.623   1
   0 -18  -5 1241.88 255.076   1
   0  18   5 1391.18 217.390  11
   0  18   5 1603.34 283.287  12
   0  18   6 53.7576 114.014  12
   0 -18  -6 109.608 119.801   1
   0 -18  -7 4692.09 491.061   1
   0  18   7 4657.07 481.245  12
   0 -18   7 4057.01 384.880   4
   0  18   8 1787.12 320.810  12
   0 -18  -8 1636.05 300.280   1
   0 -18   8 1347.39 224.481   4
   0 -18   8 1802.00 349.815   6
   0  18   9 1584.89 336.051  13
   0 -18   9 1285.12 283.336   6
   0  18   9 858.809 222.505   7
   0  18   9 1227.77 281.292  12
   0  18  10 206.595 113.906  12
   0  18  10 291.520 150.974   5
   0 -18  10 147.731 148.816   6
   0  18  10 462.643 201.123  13
   0 -18  11-46.9022 134.277   6
   0  18  11-114.447 161.655  13
   0  18  12 113.433 154.608  13
   0 -18  12 23.3328 97.2265   3
   0 -18  12 15.7036 141.283   6
   0 -18  13 780.608 216.971   3
   0 -18  13 470.677 209.604   6
   0  18  13 675.434 244.761  13
   0 -18  14 122.519 143.692   6
   0  18  14-67.8864 136.591  13
   0 -18  14-6.71968 79.1541   3
   0 -18  15 186.628 140.631   6
   0 -18  15 288.181 115.731   3
   0 -19   0-70.4568 112.128   1
   0 -19   1 1010.55 235.655   1
   0 -19  -1 997.262 230.815   1
   0 -19  -2 35247.8 1250.45   1
   0  19   2 38066.9 1019.35  11
   0  19   3 466.814 129.565  11
   0 -19  -3 605.644 209.907   1
   0  19   4 1440.11 217.564  11
   0 -19  -4 1171.53 260.663   1
   0  19   5 1660.83 281.134  12
   0 -19  -5 1620.09 300.370   1
   0  19   5 2043.86 279.762  11
   0  19   6 663.263 202.567  12
   0 -19  -6 585.920 203.044   1
   0  19   7 106.480 99.3298  12
   0 -19   7 177.768 128.328   2
   0 -19   7 110.489 130.105   4
   0 -19  -7 71.0568 131.556   1
   0 -19   8 4670.45 423.395   4
   0  19   8 4896.60 525.767  12
   0 -19   8 4369.67 517.327   6
   0 -19  -8 4820.05 518.673   1
   0 -19   8 4037.39 365.417   2
   0  19   9 9240.68 672.260   7
   0 -19   9 10001.9 767.116   6
   0  19   9 9576.90 736.209  12
   0  19   9 9931.11 838.421  13
   0 -19   9 8720.34 594.505   4
   0  19  10 2834.50 476.191  13
   0 -19  10 2526.19 427.633   6
   0  19  10 2039.83 363.112   5
   0  19  11 315.078 199.820  13
   0 -19  11 393.517 204.194   6
   0  19  11 165.595 135.525   5
   0 -19  12 635.473 263.977   6
   0  19  12 713.024 257.660  13
   0 -19  12 403.492 131.818   3
   0 -19  13 1538.93 288.677   3
   0 -19  13 911.108 257.141   6
   0  19  13 1685.91 350.565  13
   0 -19  14 8.41930 111.716   6
   0 -19  14 56.7238 86.8118   3
   0  19  14 138.149 170.818  13
   0 -19  15 631.217 182.723   6
   0 -19  15 585.372 143.475   3
   0 -20   0 19052.8 933.996   1
   0 -20   1 2462.06 342.677   1
   0 -20  -1 2250.97 350.439   1
   0 -20  -2 310.498 155.034   1
   0  20   2 639.002 184.804  11
   0  20   3 887.656 183.390  11
   0 -20  -3 614.968 209.529   1
   0 -20  -4 626.609 224.034   1
   0  20   4 740.803 181.240  11
   0  20   5 475.264 178.390  12
   0 -20  -5 330.066 159.881   1
   0  20   5 123.265 105.155  11
   0  20   6-150.034 141.896  12
   0 -20  -6-130.933 157.429   1
   0 -20   6 18.6707 89.0696   4
   0  20   7 1873.12 321.242  12
   0 -20  -7 1206.38 264.286   1
   0 -20   7 1651.87 249.446   2
   0 -20   7 1479.60 252.812   4
   0 -20   8 4699.13 514.420   6
   0  20   8 4499.72 510.365  12
   0 -20   8 4753.97 438.107   4
   0 -20   8 3644.36 352.523   2
   0 -20  -8 4649.88 512.333   1
   0  20   9 7006.61 710.785  13
   0  20   9 6054.80 557.215   7
   0 -20   9 5433.81 605.120   6
   0 -20   9 6136.90 512.333   4
   0  20   9 6176.52 616.223  12
   0  20  10 8204.29 736.326   5
   0 -20  10 10727.4 775.771   6
   0  20  10 10825.0 902.658  13
   0 -20  11 369.669 206.741   6
   0  20  11 375.195 154.511   5
   0  20  11 539.383 257.127  13
   0 -20  12 871.893 229.817   3
   0  20  12 1069.25 305.335  13
   0 -20  12 544.686 202.075   6
   0 -20  13 822.897 202.732   3
   0  20  13 819.162 242.658  13
   0 -20  13 676.196 228.440   6
   0 -20  14 238.168 159.207   6
   0  20  14 339.999 179.872  13
   0 -20  14 272.553 125.667   3
   0 -20  15 127.138 93.8728   3
   0 -21   0-7.12315 137.036   1
   0 -21  -1 76.0533 149.425   1
   0 -21   1-65.1011 136.640   1
   0 -21  -2 84.9289 149.857   1
   0  21   2 296.836 149.604  11
   0  21   3 2596.85 299.483  11
   0 -21  -3 2174.54 351.765   1
   0 -21  -4 10054.0 751.682   1
   0  21   4 10752.0 627.222  11
   0  21   5 3512.34 425.426  12
   0  21   5 3793.71 385.375  11
   0 -21  -5 3776.93 474.578   1
   0  21   6 472.848 163.360  12
   0 -21   6 162.756 109.126   2
   0 -21   6 296.615 161.578   4
   0 -21  -6 628.229 210.997   1
   0 -21   7 1650.61 254.405   2
   0 -21   7 2436.43 327.535   4
   0 -21  -7 1519.45 309.615   1
   0  21   7 2474.21 393.501  12
   0  21   8 2114.13 372.205  12
   0 -21  -8 1772.65 357.801   1
   0 -21   8 1644.97 254.827   2
   0 -21   8 2740.80 351.269   4
   0 -21   9 3577.53 464.403   6
   0  21   9 3879.22 547.706  13
   0 -21   9 4080.27 423.994   4
   0  21  10 87.6208 103.176   5
   0  21  10 297.206 210.392  13
   0 -21  10 182.220 133.951   6
   0 -21  11 148.732 203.725   6
   0  21  11 78.6722 129.984   5
   0  21  11 331.108 199.850  13
   0  21  12 191.960 156.590  13
   0 -21  12-194.898 203.351   6
   0 -21  12-6.40557 106.138   3
   0 -21  13 14.4625 115.932   6
   0  21  13-146.865 131.034  13
   0 -21  13 10.4211 82.4594   3
   0 -21  14 64.8327 112.747   6
   0  21  14-62.7814 105.547  13
   0 -21  14 178.490 108.502   3
   0 -21  15 185.160 87.8395   3
   0 -22   0 716.979 252.379   1
   0 -22  -1 1489.80 302.936   1
   0 -22  -2-60.7908 145.233   1
   0  22   2 237.564 155.811  11
   0  22   3 371.395 136.309  11
   0 -22  -3 420.745 190.726   1
   0 -22  -4 16141.0 978.287   1
   0  22   4 16585.6 803.191  11
   0  22   5 1690.07 274.340  11
   0 -22  -5 1673.53 336.447   1
   0  22   5 1684.39 304.682  12
   0 -22   5 1531.13 240.271   2
   0  22   6 6550.26 596.381  12
   0 -22   6 5870.93 465.602   2
   0 -22  -6 6184.35 628.864   1
   0 -22   6 6069.68 506.582   4
   0 -22   7 5061.58 460.159   4
   0  22   7 5542.28 566.406  12
   0 -22   7 4645.30 419.512   2
   0 -22  -7 5087.68 562.667   1
   0 -22   8-110.770 102.083   4
   0  22   8 44.8101 115.105  12
   0 -22   8 37.4250 101.666   2
   0 -22  -8-321.638 245.286   1
   0 -22   9 135.270 128.724   4
   0 -22   9-1.83485 137.658   6
   0 -22   9 209.224 133.484   2
   0  22   9 397.030 165.611  13
   0  22  10 183.237 155.412   5
   0 -22  10 258.717 180.737   6
   0  22  10 411.303 188.421  13
   0 -22  11-23.5730 156.409   6
   0  22  11-284.932 146.359   5
   0  22  11 171.407 164.893  13
   0  22  12 13.7784 129.130   5
   0  22  12 116.625 146.017  13
   0 -22  12-146.610 124.140   3
   0 -22  12-10.3855 120.542   6
   0 -22  13 155.150 145.854   6
   0  22  13 321.265 159.384  13
   0 -22  13 320.486 135.016   3
   0  22  14-57.4054 108.864  13
   0 -22  14-7.41337 65.4430   3
   0 -23   0 155.376 132.608   1
   0 -23  -1 521.508 185.051   1
   0 -23  -2 11370.6 829.757   1
   0  23   2 11917.2 661.755  11
   0 -23  -3 1951.59 382.078   1
   0  23   3 1683.38 260.411  11
   0 -23   3 1355.04 219.075   2
   0 -23   4 132.372 106.390   2
   0  23   4 400.211 144.823  11
   0 -23  -4 131.716 128.830   1
   0 -23  -5 1732.12 323.129   1
   0 -23   5 1745.37 269.111   2
   0  23   5 1427.53 288.299  12
   0  23   6 658.487 231.438  12
   0 -23  -6 6.76652 172.639   1
   0 -23   6 382.611 167.958   4
   0 -23   6 701.284 211.376   2
   0 -23  -7-87.9373 175.671   1
   0 -23   7 187.587 112.363   2
   0  23   7-59.9974 156.629  12
   0 -23   7 56.6408 120.285   4
   0 -23   8 393.668 144.931   4
   0 -23   8 261.868 130.616   2
   0  23   9 216.068 198.511  13
   0 -23   9 51.6289 83.2653   2
   0  23   9 182.791 179.520   5
   0 -23   9-156.428 114.015   4
   0  23  10 114.159 149.109   5
   0  23  10 284.036 190.925  13
   0 -23  10-6.74987 138.327   6
   0 -23  11 91.8313 136.812   6
   0  23  11 153.244 125.858   5
   0  23  11 171.596 162.521  13
   0 -23  12 566.737 188.022   3
   0 -23  12 939.316 252.227   6
   0  23  12 688.846 269.569  13
   0  23  12 683.384 179.502   5
   0 -23  13 58.5953 92.2443   3
   0  23  13 76.4722 113.164  13
   0  23  14-110.324 106.914  13
   0 -23  14-50.4206 60.1726   3
   0 -24   0 10608.0 817.266   1
   0 -24  -1 5153.02 578.731   1
   0  24   2 672.858 198.293  11
   0 -24   2 213.092 119.614   2
   0 -24  -2 400.053 190.722   1
   0  24   3 11560.0 689.267  11
   0 -24  -3 11495.6 873.492   1
   0 -24   3 9678.68 587.311   2
   0 -24   4 16618.4 779.274   2
   0 -24  -4 18995.1 1145.81   1
   0  24   4 16763.8 960.163  12
   0  24   4 19177.2 910.277  11
   0  24   5-189.444 128.857  12
   0 -24   5-113.189 104.420   2
   0 -24  -5-351.589 263.701   1
   0 -24   6 92.7469 115.376   2
   0 -24  -6-189.936 186.764   1
   0  24   6-4.35240 125.321  12
   0 -24   6-97.6530 131.371   4
   0  24   7 2372.38 394.611  12
   0 -24   7 2284.67 306.351   2
   0 -24   7 2434.35 339.129   4
   0 -24  -7 2092.64 376.073   1
   0 -24   8 167.099 138.592   4
   0 -24   8 204.571 93.1855   2
   0 -24   9 129.236 93.0814   2
   0 -24   9 199.245 120.990   4
   0  24   9 195.037 173.279  13
   0  24   9 75.4044 136.882   5
   0  24  10 12.9292 93.1944   5
   0  24  10 51.2919 136.342  13
   0 -24  11 5.06714 129.977   6
   0  24  11 281.489 177.618  13
   0  24  11 260.405 161.545   5
   0  24  12-257.733 126.141   5
   0 -24  12-124.725 102.238   3
   0 -24  12 20.1255 127.749   6
   0  24  12 67.4560 121.970  13
   0 -24  13-4.71814 79.4976   3
   0  24  13 32.0892 107.592  13
   0 -24  14-39.8586 59.7227   3
   0 -25   0 30.3323 100.557   2
   0 -25  -1 1605.31 343.266   1
   0  25   1 1681.25 275.989  11
   0 -25  -1 1310.81 216.136   2
   0 -25   1 1494.76 237.483   2
   0  25   2 6523.85 526.407  11
   0 -25   2 6250.25 483.716   2
   0 -25  -2 6378.15 680.407   1
   0 -25  -2 6063.17 442.807   2
   0 -25  -3 15598.4 1049.10   1
   0  25   3 17414.5 861.680  11
   0 -25   3 14512.8 735.558   2
   0 -25  -4 18098.7 1139.60   1
   0 -25   4 16619.3 795.455   2
   0  25   4 16877.5 984.884  12
   0  25   5 194.757 157.287  12
   0 -25   5 302.348 159.064   2
   0 -25  -5-99.9130 163.877   1
   0 -25   5 233.069 136.852   4
   0  25   6 1655.78 345.337  12
   0 -25   6 1964.98 297.078   2
   0 -25   6 1724.56 290.151   4
   0 -25  -6 1755.50 380.161   1
   0 -25   7 23.5533 112.526   2
   0 -25   7 16.7224 100.028   4
   0 -25   8 1409.16 260.349   4
   0 -25   8 1278.56 239.776   2
   0  25   9 570.617 242.291  13
   0  25   9 544.564 219.979   5
   0  25  10 233.210 159.982   5
   0  25  10 25.9519 115.544  13
   0  25  11 715.788 207.283   5
   0  25  11 1041.45 291.924  13
   0  25  12 72.5562 118.772  13
   0  25  12 4.64965 74.8524   5
   0 -25  12-34.7440 88.8266   3
   0 -25  13 24.8696 85.8481   3
   0  25  13 141.273 126.680  13
   0 -25  14 53.1105 55.8709   3
   0 -26   0 531.493 147.763   2
   0 -26   1 3467.72 361.037   2
   0  26   1 4119.96 426.039  11
   0 -26  -1 3890.49 369.761   2
   0 -26   2 402.211 161.352   2
   0  26   2 321.202 165.727  11
   0 -26  -2 170.061 178.795   1
   0 -26  -2 214.088 128.619   2
   0 -26   3-19.5281 101.542   2
   0 -26  -3 62.9869 153.794   1
   0  26   3 96.2580 142.523  11
   0 -26   4 11658.1 678.050   2
   0  26   4 11068.6 821.408  12
   0 -26  -4 12987.3 993.640   1
   0  26   4 12890.0 781.652  11
   0 -26  -5 4927.86 630.117   1
   0 -26   5 5328.59 501.369   4
   0  26   5 4115.28 511.923  12
   0 -26   5 5263.29 463.276   2
   0 -26   6 250.125 148.180   2
   0 -26   6 373.596 151.067   4
   0 -26   7 189.894 125.851   4
   0 -26   7 203.572 126.219   2
   0 -26   8 49.6308 99.6919   4
   0 -26   8 251.207 142.734   2
   0  26   9 61.5029 126.704   5
   0  26   9 185.790 155.036  13
   0  26  10 93.8234 131.810   5
   0  26  10 58.0117 130.445  13
   0  26  11-178.763 125.193  13
   0  26  11 25.4932 79.8533   5
   0  26  12-113.838 106.681  13
   0  26  12-276.008 120.048   5
   0 -26  12-113.389 111.161   3
   0 -26  13 196.839 102.295   3
   0  26  13 282.485 139.897  13
   0 -26  14-25.1945 50.5279   3
   0 -27   0-18.3963 98.2478   2
   0 -27   1 601.321 176.709   2
   0 -27  -1 483.078 153.774   2
   0  27   2-76.5139 154.683  11
   0 -27   2-29.3830 107.324   2
   0 -27  -2-48.1036 121.293   2
   0 -27   3 2722.62 348.001   2
   0  27   3 2243.64 336.274  11
   0 -27  -3 2851.57 466.392   1
   0 -27  -4 1887.02 400.913   1
   0  27   4 1373.15 299.879  12
   0  27   4 1444.10 297.008  11
   0 -27   4 1530.77 268.257   2
   0  27   5 5243.07 587.588  12
   0 -27   5 5957.74 536.199   4
   0 -27   5 6120.33 507.413   2
   0 -27   6 2068.23 316.349   4
   0 -27   6 1995.84 294.821   2
   0 -27   7 267.896 137.284   2
   0 -27   7 480.095 167.616   4
   0 -27   8 2618.57 322.321   2
   0 -27   8 2666.88 353.081   4
   0  27   9 172.241 154.603  13
   0  27   9 89.5469 128.009   5
   0  27  10 17.6844 105.360   5
   0  27  10 148.863 139.179  13
   0  27  11 36.3309 104.393   5
   0  27  11 59.0981 141.709  13
   0  27  12-10.0858 91.2050   5
   0  27  12 113.543 141.015  13
   0 -27  12 19.9921 87.3948   3
   0 -27  13 47.9219 59.3651   3
   0  27  13-74.0893 86.6852  13
   0 -28   0 245.880 156.271   2
   0  28   0 317.457 195.065  11
   0 -28  -1 38.8696 119.672   2
   0 -28   1 200.231 131.776   2
   0  28   1 56.3662 130.385  11
   0  28   2 4390.31 473.350  11
   0 -28  -2 3151.39 344.698   2
   0 -28   2 3656.29 402.290   2
   0 -28   3 425.750 127.768   2
   0  28   3 721.649 228.067  11
   0 -28   4 1225.48 230.844   2
   0 -28   5-153.761 127.957   4
   0 -28   5 314.441 146.247   2
   0 -28   6 130.398 137.660   2
   0 -28   6 238.537 176.795   4
   0 -28   7-58.9196 116.409   4
   0 -28   7 74.7324 102.629   2
   0 -28   8 217.726 138.006   4
   0  28   8 113.322 126.497   5
   0 -28   8 49.0741 104.274   2
   0  28   9 583.884 237.561   5
   0  28   9 437.485 234.347  13
   0  28  10 150.588 138.352   5
   0  28  10 74.0791 112.341  13
   0  28  11 781.108 217.443   5
   0  28  11 854.385 236.267  13
   0 -28  12 94.5704 81.0266   3
   0  28  12 230.304 108.296   5
   0  28  12-16.8368 100.008  13
   0 -28  13 45.9989 60.6812   3
   0  28  13 37.1696 87.1315  13
   0 -29   0-94.6989 112.481   2
   0  29   0 504.672 205.950  11
   0  29   1 331.465 176.625  11
   0 -29   1 188.650 132.178   2
   0 -29  -1-101.463 121.597   2
   0 -29   2 361.718 172.904   2
   0 -29  -2 340.740 123.782   2
   0 -29   3 270.146 141.605   2
   0 -29   4-0.60853 116.194   2
   0 -29   5 604.250 191.213   2
   0 -29   5 674.260 194.995   4
   0 -29   6 486.496 170.360   4
   0 -29   6 370.041 179.034   2
   0 -29   7 874.348 198.230   2
   0 -29   7 1277.83 261.213   4
   0  29   8 436.984 209.122   5
   0 -29   8 133.622 123.891   2
   0  29   8 282.851 159.152  13
   0 -29   8 605.265 180.330   4
   0  29   9 95.5848 105.418   5
   0  29   9-77.1697 134.802  13
   0  29  10 178.461 163.625  13
   0  29  10 206.283 131.076   5
   0  29  11 391.380 155.457   5
   0  29  11 426.117 156.889  13
   0 -29  12-7.61191 65.4712   3
   0  29  12 86.1263 78.0918   5
   0  29  12-168.246 127.333  13
   0 -29  13 40.2993 54.7449   3
   0  29  13-40.2247 68.8519  13
   0 -30   0 2738.07 350.319   2
   0 -30   1 1030.52 238.335   2
   0 -30  -1 963.463 222.942   2
   0 -30  -2 437.651 144.806   2
   0 -30   2 469.349 187.783   2
   0 -30   3 1159.93 245.927   2
   0 -30   4 236.330 151.200   2
   0 -30   5 1798.73 293.879   2
   0 -30   5 1670.81 290.301   4
   0 -30   6 47.2941 114.944   2
   0 -30   6 31.9352 100.054   4
   0 -30   7 66.1475 104.326   2
   0 -30   7 77.0227 105.176   4
   0 -30   8 28.5597 106.580   4
   0  30   8-79.3639 101.331   5
   0 -30   8 24.2113 94.5935   2
   0  30   8-26.7688 146.006  13
   0  30   9 119.169 138.972  13
   0  30   9 120.828 110.953   5
   0  30  10 219.135 128.834   5
   0  30  10 372.893 163.864  13
   0 -30  11-9.27126 72.4954   3
   0  30  11 10.3952 96.0729  13
   0  30  11 68.9269 81.8886   5
   0 -30  12-48.1865 51.7462   3
   0  30  12-6.09785 95.3371  13
   0 -31   0 53.7516 100.377   2
   0 -31  -1 190.277 119.402   2
   0 -31   1 21.6947 103.945   2
   0 -31   2 275.001 129.567   2
   0 -31  -2 300.208 127.088   2
   0 -31   3 2969.71 372.672   2
   0 -31   4 285.435 148.138   2
   0 -31   4 580.960 197.271   4
   0 -31   5 138.616 119.330   2
   0 -31   5 88.3290 109.980   4
   0 -31   6 232.511 145.722   4
   0 -31   6 246.333 108.634   2
   0  31   7 199.867 158.586   5
   0 -31   7 61.1313 114.692   4
   0 -31   7 80.3484 115.795   2
   0  31   8-141.959 123.634   5
   0  31   8-32.3407 101.418  13
   0 -31   8-144.036 118.500   4
   0  31   9-31.0561 108.289  13
   0  31   9 170.335 136.888   5
   0  31  10-146.994 120.904  13
   0  31  10-15.3319 108.487   5
   0  31  11 63.4301 98.4754  13
   0 -31  11 48.7566 67.6318   3
   0  31  11 15.1918 69.2346   5
   0  31  12 256.898 112.221  13
   0 -31  12 158.112 84.5783   3
   0 -32   0 3597.00 394.708   2
   0 -32   1 144.851 122.801   2
   0 -32  -1 84.2601 97.2240   2
   0 -32  -2-151.337 119.268   2
   0 -32   2 82.6263 143.589   2
   0 -32   3 251.275 167.930   2
   0 -32   4 91.1149 112.892   4
   0 -32   4-25.0720 122.960   2
   0 -32   5-51.9322 126.143   2
   0 -32   5 99.7240 151.000   4
   0 -32   6-83.5772 100.912   2
   0 -32   6-70.2492 93.8123   4
   0 -32   7 95.0191 98.1208   4
   0 -32   7-58.0022 86.2555   2
   0  32   8 964.497 243.084   5
   0  32   8 303.045 175.004  13
   0  32   9 478.058 171.237   5
   0  32   9 721.004 230.439  13
   0  32  10 188.735 108.766  13
   0  32  10 96.7404 102.027   5
   0  32  11 19.6377 71.4881  13
   0  32  11 28.4213 69.2001   5
   0 -32  11-20.6773 58.4934   3
   0 -33   0 187.182 139.779   2
   0 -33  -1 1158.30 231.234   2
   0 -33   1 855.769 200.553   2
   0 -33   2 546.334 180.858   2
   0 -33  -2 324.957 147.112   2
   0 -33   3 25.5453 114.428   2
   0 -33   4 269.245 150.621   4
   0 -33   4 278.716 160.695   2
   0 -33   5 636.125 191.014   2
   0 -33   5 611.845 181.001   4
   0 -33   6-132.429 109.370   2
   0  33   6 99.3966 137.670   5
   0 -33   6 47.9043 91.7678   4
   0 -33   7 124.018 100.937   2
   0  33   7 173.439 132.431   5
   0  33   7 34.3790 107.279  13
   0 -33   7 183.869 110.795   4
   0  33   8 132.146 120.100  13
   0  33   8 133.863 116.120   5
   0  33   9 54.9808 88.0217   5
   0  33   9 19.1689 102.869  13
   0  33  10 21.5093 83.8170  13
   0  33  10-137.285 91.7433   5
   0  33  11 187.861 88.4641   5
   0 -33  11 37.3799 54.3039   3
   0 -34   0 448.762 175.823   2
   0 -34  -1 230.407 144.522   2
   0 -34   1 304.201 137.463   2
   0 -34   2 440.555 177.224   2
   0 -34  -2 518.480 149.663   2
   0 -34   3-83.1016 111.747   2
   0 -34   4 159.690 123.670   4
   0 -34   4 251.459 119.809   2
   0  34   5 23.8121 112.442   5
   0 -34   5-65.2993 90.5131   4
   0 -34   5 19.0359 111.562   2
   0 -34   6 175.723 97.3025   4
   0 -34   6 92.2062 105.456   2
   0  34   6 57.8523 104.327   5
   0 -34   7 321.716 132.642   4
   0  34   7 572.809 203.892  13
   0  34   7 433.383 181.612   5
   0  34   8 37.6185 104.675  13
   0  34   8 82.9093 113.858   5
   0  34   9 38.8572 81.0224   5
   0  34   9 66.3319 94.1542  13
   0  34  10 147.020 88.8985   5
   0 -34  10 49.0811 67.5932   3
   0  34  10 153.679 116.212  13
   0 -35   0 44.4531 105.500   2
   0 -35  -1 395.433 138.637   2
   0 -35   1 506.699 175.584   2
   0 -35   2 243.120 148.227   2
   0 -35  -2 151.622 124.699   2
   0 -35   3 28.3720 123.954   2
   0 -35   3 66.7554 123.016   4
   0 -35   4 468.944 173.160   4
   0  35   4 148.303 169.047   5
   0 -35   4 380.162 142.889   2
   0  35   5 503.811 208.442   5
   0 -35   5 896.668 193.572   2
   0 -35   5 898.904 203.006   4
   0 -35   6-68.4133 93.0078   4
   0  35   6-68.2958 112.205   5
   0 -35   6-151.599 119.109   2
   0  35   7 381.313 160.539  13
   0 -35   7 117.433 90.1418   4
   0  35   7 231.303 140.431   5
   0  35   8 31.8578 72.0609   5
   0  35   8 53.3681 127.321  13
   0  35   9 1257.53 222.650  13
   0  35   9 1167.47 214.076   5
   0  35  10 881.840 157.654   5
   0 -35  10 210.152 82.2025   3
   0 -36   0-133.351 105.565   2
   0 -36  -1 83.5772 110.310   2
   0 -36   1 1.52066 104.820   2
   0  36   1 191.879 121.302   5
   0 -36   2 148.671 103.738   2
   0  36   2 110.389 110.718   5
   0 -36  -2-9.29234 90.9339   2
   0 -36   3-166.451 118.634   2
   0  36   3 135.771 109.902   5
   0 -36   3-58.1645 96.7947   4
   0  36   4-52.8581 124.712   5
   0 -36   4 92.4640 84.8614   4
   0 -36   4 213.054 114.654   2
   0  36   5 151.672 112.017   5
   0 -36   5 83.3141 87.1958   2
   0 -36   5 167.434 94.5064   4
   0  36   6 127.716 114.707   5
   0  36   6 45.6471 85.9370  13
   0 -36   6-109.558 77.6685   4
   0  36   7 392.514 160.437   5
   0  36   7 269.975 122.678  13
   0  36   8 196.192 121.357  13
   0  36   8 312.142 132.298   5
   0  36   9 3652.17 328.343   5
   0 -37   0 136.722 141.577   2
   0 -37  -1-11.3986 76.6895   2
   0  37   1 156.487 124.283   5
   0 -37   1-163.849 117.778   2
   0 -37   2 1927.96 260.366   2
   0  37   2 2126.18 327.881   5
   0 -37  -2 1595.27 214.637   2
   0 -37   3 271.113 110.017   2
   0  37   3 196.952 126.957   5
   0 -37   3-15.7397 85.1924   4
   0 -37   4 17.3679 82.6630   2
   0  37   4 51.2095 86.1561   5
   0 -37   4 124.797 114.412   4
   0  37   5 43.0137 72.3544   5
   0 -37   5 80.8126 89.3430   4
   0  37   6 305.289 133.794   5
   0 -37   6 277.314 105.562   4
   0  37   6 558.067 179.988  13
   0  37   7 88.9748 85.9481   5
   0  37   7 68.1873 102.696  13
   0  37   8 2097.38 260.315   5
   0  37   9 1379.29 185.631   5
   0 -38   0-89.3763 78.7034   2
   0 -38   1 59.4125 89.1587   2
   0 -38  -1-47.1579 87.1420   2
   0 -38   2-57.6184 84.1243   2
   0  38   2 11.8167 79.8042   5
   0 -38   2 79.3213 85.7910   4
   0 -38   3 45.6065 83.5421   4
   0  38   3-30.3354 82.2840   5
   0 -38   3 45.3859 87.7671   2
   0  38   4-79.7714 78.7914   5
   0 -38   4 1304.68 187.008   4
   0 -38   5-64.2569 82.4749   4
   0  38   5 47.3928 90.3201   5
   0  38   5 116.753 112.855  13
   0  38   6 49.4780 78.2056   5
   0  38   6-155.816 115.758  13
   0  38   7 271.115 101.057   5
   0  38   8 137.733 68.9993   5
   0 -39   0-36.6056 72.5572   2
   0 -39   1 44.9294 67.8314   2
   0 -39   1 81.6352 95.4244   4
   0 -39   2 6.69856 76.9996   2
   0 -39   2 169.156 95.1951   4
   0  39   2 16.6346 80.8840   5
   0  39   3 183.202 108.806   5
   0 -39   3-87.6191 92.1272   4
   0  39   4 49.5315 78.7359   5
   0 -39   4 82.8257 72.7720   4
   0 -39   5 0.13619 60.4793   4
   0  39   5 99.2687 92.4191  13
   0  39   5-94.2049 88.7289   5
   0  39   6 32.6899 70.2079   5
   0  39   7 237.866 91.9743   5
   0 -40   0 18.1434 68.9271   4
   0 -40   1 43.6604 67.8111   4
   0 -40   2 633.964 148.341   4
   0  40   3 545.006 141.204   5
   0 -40   3 217.148 94.5479   4
   0 -40   4-107.904 61.2654   4
   0  40   4-21.5935 58.9412   5
   0  40   5 92.6537 73.0399   5
   0 -41   0-64.4038 62.6907   4
   0 -41   1-33.8665 69.3814   4
   0 -41  -1-181.063 82.9420   4
   0 -41  -2 138.806 81.6969   4
   0 -41   2 314.464 99.9485   4
   0 -41   3 124.628 68.3150   4
  -1   0   0-10.0021 18.5193   8
  -1   0   1 25.6223 29.9399  12
  -1   0   1 13.2414 10.2274   8
  -1   0   1 21.3968 16.0336   7
   1   0   1 12.8738 15.1285   7
  -1   0   2 411730. 1389.92   7
   1   0   2 409410. 1401.19   7
  -1   0   3 3952.59 174.203   7
  -1   0   3 4081.95 211.035  10
   1   0   3 3965.63 175.223   7
   1   0   4 8212.50 295.866   7
  -1   0   4 8069.42 286.863   7
   1   0   5 374.837 81.4856   7
  -1   0   5 385.239 81.4268   7
   1   0   6 1466.18 162.141   7
  -1   0   6 1643.18 170.751   7
   1   0   7 12372.4 508.931   7
  -1   0   7 12164.0 498.937   7
  -1   0   8 1585.32 202.922   7
   1   0   8 1540.49 191.594   7
  -1   0  -8 1351.40 160.867   8
  -1   0   9 6622.22 436.952   7
  -1   0  -9 6665.41 372.484   8
   1   0   9 6607.11 437.823   7
   1   0  10 2515.67 287.766   7
  -1   0  10 2663.07 294.750   7
   1   0  11 5423.67 542.185   6
  -1   0  11 4736.66 466.262   3
  -1   0  11 5657.10 573.162   6
   1   0  11 4541.71 484.394   3
  -1   0  12 3952.03 521.217   6
   1   0  12 4166.04 535.110   6
   1   0  13 2141.77 354.590   6
  -1   0  13 1784.96 355.288   6
   1   0  14 59.4378 138.831   6
  -1   0  14-179.326 137.685   6
  -1   0  15 377.093 182.403   6
   1   0  15 429.264 180.268   6
   1   0  16 104.222 106.343   6
  -1   0  16 264.154 148.109   6
  -1   0  17 25.7545 97.5081   6
   1  -1  16 9.38172 100.953   6
  -1   1  16 351.511 138.097   6
   1  -1  15 186.368 168.232   6
  -1   1  15 36.2602 123.826   6
   1  -1  14 94.5986 170.236   6
  -1   1  14 243.055 165.232   6
   1  -1  13 671.551 279.294   6
  -1   1  13 549.883 238.335   6
   1  -1  12 5754.55 578.940   3
  -1   1  12 5568.42 575.834   6
   1  -1  12 5754.81 584.872   6
   1  -1  11 3209.28 423.711   3
  -1   1  11 5580.74 565.824   6
  -1   1  11 3819.13 405.745   7
   1  -1  11 5318.05 542.348   6
  -1   1  10 1278.95 234.164   7
  -1   1   9 1347.99 245.514   7
   1  -1   9 1598.45 294.606   7
  -1  -1  -9 1192.24 165.559   8
   1  -1   8 491.932 163.186   7
  -1   1   8 286.178 138.634   7
   1  -1   7 1825.70 213.827   7
  -1   1   7 1831.97 212.610   7
   1  -1   6 462.164 90.8777   7
  -1   1   6 590.202 111.987   7
  -1   1   5 3294.46 215.646   7
   1  -1   5 3553.14 220.886   7
  -1   1   4 2160.20 154.650   7
  -1   1   4 2126.86 183.024  12
   1  -1   4 2229.47 158.679   7
  -1   1   3 612.867 96.6442  10
  -1   1   3 595.790 74.8917   7
   1  -1   3 654.847 78.8881   7
  -1   1   2 138207. 853.383   7
  -1   1   2 137380. 1091.09  12
  -1   1   2 139386. 1045.25  10
   1  -1   2 137033. 846.016   7
  -1   1   1 5212.83 102.429   8
  -1   1   1 5460.00 174.581  12
   1  -1   1 5574.57 125.676   7
  -1   1   0 48365.8 385.020   8
  -1   1  -1 5132.54 151.411   8
   1   1   1 4930.75 98.9189  12
  -1  -1   1 5383.51 120.231   7
   1   1   2 137924. 871.441  12
  -1  -1   2 136327. 829.615   7
   1   1   2 136220. 856.752   7
   1  -1  -3 640.146 66.0393   1
   1   1   3 542.434 74.2810   7
  -1  -1   3 536.325 73.1417   7
  -1  -1   3 574.943 95.0303  10
   1   1   4 1995.97 148.826   7
   1  -1  -4 2351.46 111.621   1
  -1  -1   4 2157.35 155.330   7
  -1  -1   5 3586.65 225.176   7
   1   1   5 3184.50 211.919   7
   1  -1  -5 3204.53 134.415   1
  -1  -1   6 524.128 98.3833   7
   1   1   6 440.097 94.6682   7
  -1  -1   7 1826.86 193.645   7
   1   1   7 1883.30 209.424   7
  -1   1  -7 2071.23 182.143   8
  -1  -1   8 301.098 151.152   7
  -1   1  -8 296.699 79.5435   8
   1   1   8 394.746 156.035   7
  -1   1  -9 1187.63 155.112   8
  -1  -1   9 1688.75 274.634   7
   1   1   9 1492.69 233.586   7
   1   1  10 841.407 205.720   7
   1   1  11 3160.56 408.215   3
   1   1  11 3762.67 389.457   7
  -1  -1  11 5219.10 564.431   6
  -1  -1  11 3134.78 388.543   3
   1   1  11 2202.12 398.083  13
   1   1  11 4249.87 550.352   6
  -1  -1  12 5183.36 562.404   6
   1   1  12 5484.53 598.198   6
   1   1  13 690.511 274.611   6
  -1  -1  13 553.648 256.739   6
   1   1  14 211.809 167.370   6
  -1  -1  14 145.631 145.408   6
   1   1  15 312.158 181.644   6
  -1  -1  15 191.234 154.195   6
  -1  -1  16 187.216 146.483   6
  -1  -1  17 76.4673 103.364   6
  -1   2  16 17.8884 99.8073   6
   1  -2  16 138.483 133.826   6
  -1   2  15 335.120 173.126   6
   1  -2  15 347.709 180.411   6
   1  -2  14 135.510 150.004   6
  -1   2  14 174.672 177.370   6
  -1   2  13 555.413 220.503   6
   1  -2  13-31.1045 142.858   6
  -1   2  12 2602.46 415.505   6
   1  -2  12 3280.04 441.563   3
   1  -2  12 3429.28 480.029   6
  -1   2  11 7094.62 641.090   6
   1  -2  11 7437.67 647.942   6
  -1   2  11 6370.80 500.996   7
   1  -2  11 5931.00 556.636   3
  -1   2  10 1176.75 225.522   7
  -1   2   9 3630.28 340.967   7
   1  -2   8 6126.28 383.336   7
  -1   2   8 6258.98 403.467   7
   1  -2   7 586.678 114.600   7
  -1   2   7 671.530 128.527   7
  -1   2   6 442.206 96.2585   7
   1   2  -6 551.188 64.2715   8
   1  -2   6 348.437 84.3592   7
  -1   2   5 3416.01 222.128   7
   1  -2   5 3424.81 214.134   7
  -1   2   5 3496.37 273.280  12
   1   2  -5 3608.45 135.772   8
  -1   2   4 871.619 121.248  12
  -1   2   4 740.728 99.8768   7
   1   2  -4 819.486 55.6293   8
   1  -2   4 735.655 94.4159   7
   1   2  -3 10344.9 134.219   8
  -1   2   3 11071.8 349.488  10
   1  -2   3 10965.7 293.961   7
  -1   2   2 116659. 1061.75  12
   1  -2   2 118158. 802.517   7
  -1   2   2 118590. 959.141  10
  -1   2   1 4457.00 114.563   8
  -1   2   1 4472.01 127.880  11
  -1   2   0 2493.03 95.2166   8
  -1   2  -1 4501.45 147.364   8
   1   2   1 4192.31 123.612  11
   1   2   1 4500.68 112.704  12
  -1   2  -2 115708. 846.174   8
   1   2   2 117225. 827.744  12
   1  -2  -2 118552. 853.879   1
  -1  -2   2 117018. 785.570   7
   1   2   3 11259.4 315.591   7
   1   2   3 11206.2 322.727  12
  -1  -2   3 10812.2 289.119   7
   1  -2  -3 11259.7 275.726   1
  -1  -2   3 11317.8 351.084  10
  -1   2  -3 11158.8 292.926   8
   1   2   4 746.564 99.8719   7
   1   2   4 935.284 119.280  12
  -1   2  -4 787.847 88.1545   8
   1  -2  -4 902.344 89.4183   1
  -1  -2   4 687.828 91.3151   7
   1  -2  -5 3581.70 169.726   1
  -1   2  -5 3479.85 200.580   8
   1   2   5 3195.28 214.874   7
  -1  -2   5 3380.25 213.561   7
  -1  -2   6 426.240 86.4888   7
   1   2   6 531.009 104.440   7
  -1   2  -6 566.711 88.9803   8
  -1  -2   7 574.012 114.269   7
   1   2   7 552.039 114.692   7
  -1   2  -7 767.602 113.377   8
  -1   2  -8 6700.28 302.154   9
   1   2   8 6386.08 409.739   7
  -1  -2   8 5820.08 372.078   7
  -1   2  -8 6452.94 334.933   8
   1   2   9 3830.41 347.116   7
  -1  -2   9 3235.40 299.741   7
   1   2  10 1197.90 212.836   7
  -1  -2  11 6878.58 633.301   6
   1   2  11 6544.22 675.443  13
   1   2  11 6610.74 509.286   7
  -1  -2  11 6446.66 557.311   3
   1   2  11 6643.92 615.573   6
  -1  -2  12 3968.75 509.815   6
  -1  -2  12 2966.34 417.182   3
   1   2  12 3012.99 417.522   6
   1   2  13 345.218 208.942   6
  -1  -2  13 115.149 140.011   6
   1   2  14-8.35720 141.591   6
  -1  -2  14 485.028 209.121   6
   1   2  15 97.7091 154.398   6
  -1  -2  15 216.858 187.190   6
  -1  -2  16 193.542 131.779   6
  -1  -2  17-23.2760 106.155   6
   1  -3  16 397.907 152.557   6
   1  -3  15 394.519 195.329   6
  -1   3  15 282.913 176.533   6
   1  -3  14 1171.40 281.727   6
  -1   3  14 1175.73 277.879   6
   1  -3  13 271.979 181.695   3
   1  -3  13 190.881 145.633   6
  -1   3  13 322.203 180.585   6
  -1   3  12 2190.72 399.248   6
  -1   3  12 2118.59 319.250   7
   1  -3  12 1840.10 370.873   3
  -1   3  11 5486.32 459.635   7
  -1   3  11 5044.36 577.504  13
   1  -3  11 5935.47 588.844   6
   1  -3  11 4530.06 485.949   3
  -1   3  11 4822.75 538.404   6
  -1   3  10 2223.39 299.346   7
  -1   3   9 3150.42 320.651   7
  -1   3   8 4111.79 344.226   7
   1  -3   7 2575.41 222.887   7
  -1   3   7 2336.35 225.719   7
   1  -3   6 7009.93 338.817   7
  -1   3   6 7350.40 358.261   7
  -1   3   6 7981.74 447.707  12
   1   3  -6 7809.67 203.518   8
   1  -3   5 2049.28 176.140   7
   1   3  -5 1929.57 90.3039   8
  -1   3   5 2013.34 176.813   7
  -1   3   5 2054.71 209.630  12
   1   3  -4 7102.33 142.873   8
  -1   3   4 7481.76 357.580  12
  -1   3   4 7386.08 297.155   7
   1  -3   4 7173.28 275.528   7
   1   3  -3 4298.97 82.8333   8
  -1   3   3 4532.54 229.618  10
  -1   3   2 31806.8 504.358  10
  -1   3   1 38965.5 405.072  11
  -1   3   1 38224.4 385.258   8
  -1   3   0 2708.87 108.435   8
   1  -3  -1 36255.0 572.933   1
   1   3   1 36923.6 394.312  11
  -1   3  -2 31397.4 447.915   8
   1   3   2 32423.1 466.812  12
  -1  -3   2 32276.8 506.851  10
   1  -3  -3 4516.66 205.023   1
   1   3   3 4875.31 225.578  12
  -1  -3   3 4651.10 230.049  10
  -1   3  -3 4626.06 190.637   8
  -1  -3   4 6719.23 264.464   7
   1   3   4 7527.24 315.837  12
  -1   3  -4 7306.13 265.677   8
   1  -3  -4 7715.57 265.267   1
   1   3   4 6951.60 291.348   7
   1   3   5 2065.46 194.355  12
  -1   3  -5 2105.39 158.734   8
  -1  -3   5 1951.39 162.332   7
   1   3   5 1953.52 176.575   7
   1  -3  -5 2182.20 147.689   1
  -1  -3   6 7181.86 337.590   7
  -1   3  -6 7665.07 317.996   8
   1  -3  -6 8008.98 295.246   1
   1   3   6 7021.73 356.424   7
   1   3   7 2738.01 244.112   7
  -1   3  -7 2721.68 202.291   8
  -1  -3   7 2365.87 216.383   7
  -1   3  -7 2644.17 189.466   9
  -1   3  -8 4176.92 261.458   8
   1   3   8 4113.85 345.554   7
  -1   3  -8 4991.76 278.707   9
   1   3   9 2965.10 324.112   7
   1   3  10 2347.55 329.681   7
  -1  -3  11 5102.44 502.396   3
  -1  -3  11 5595.11 572.535   6
   1   3  11 5601.21 471.216   7
   1   3  11 5037.60 594.871  13
  -1  -3  12 3433.79 484.165   6
  -1  -3  12 1934.99 346.687   3
   1   3  12 1612.10 431.956  13
   1   3  12 1087.62 304.169   6
   1   3  12 2925.61 383.542   7
  -1  -3  13 141.738 165.020   6
   1   3  13-52.1111 173.931   6
  -1  -3  14 820.509 231.266   6
  -1  -3  15 232.188 174.870   6
  -1  -3  16 456.511 185.339   6
  -1  -3  17 170.391 118.872   6
   1  -4  16 104.004 108.954   6
   1  -4  15 407.490 198.424   6
   1  -4  14 491.579 257.629   6
  -1   4  14 141.512 149.362   6
  -1   4  13 710.836 237.140   6
   1  -4  13 660.581 235.280   3
  -1   4  12 10096.9 740.555   6
   1  -4  12 9613.09 771.152   6
   1  -4  12 10955.5 778.625   3
  -1   4  12 10348.4 656.600   7
   1  -4  11 1266.68 300.143   6
  -1   4  11 235.386 174.636  13
  -1   4  11 411.687 181.156   6
   1  -4  11 144.506 111.625   3
  -1   4  11 1136.92 237.153   7
  -1   4  10 8737.26 548.525   7
  -1   4   9 4167.98 359.273   7
  -1   4   8 1141.87 195.186   7
  -1   4   7 493.892 121.273   7
  -1   4   7 737.125 176.179  12
  -1   4   6 9409.30 419.335   7
   1   4  -6 9484.50 210.596   8
  -1   4   6 9365.71 486.906  12
  -1   4   5 1291.27 150.590   7
  -1   4   5 1287.18 182.986  12
   1   4  -5 1213.62 68.1339   8
   1   4  -4 5424.32 123.950   8
  -1   4   4 5464.87 308.475  12
   1   4  -3 2866.97 78.0466   8
  -1   4   2 5526.20 203.463  11
  -1   4   2 5425.86 215.580  10
  -1   4   1 6200.28 177.939   8
  -1   4   0 212.140 40.5313   8
   1  -4  -1 6350.89 264.037   1
   1   4   1 5919.84 177.463  11
  -1   4  -1 6227.56 189.276   8
  -1   4  -2 5867.18 201.690   8
   1   4   2 5341.98 204.691  12
   1   4   2 5361.68 203.869  11
  -1  -4   2 5488.96 216.523  10
   1  -4  -2 5254.51 245.485   1
  -1   4  -3 3060.68 160.091   8
   1  -4  -3 2779.38 185.796   1
   1   4   3 3278.10 203.186  12
  -1  -4   3 2903.13 184.135  10
   1   4   4 5485.88 278.391  12
   1  -4  -4 5390.61 257.199   1
  -1   4  -4 5516.51 230.253   8
   1  -4  -5 1282.18 135.204   1
   1   4   5 1159.70 141.110   7
   1   4   5 1028.75 144.187  12
  -1   4  -5 1086.74 106.586   8
   1   4   6 9887.12 428.038   7
   1  -4  -6 10109.1 370.349   1
  -1   4  -6 8783.40 337.207   8
   1   4   7 679.839 138.047   7
  -1   4  -7 626.061 115.108   9
  -1   4  -7 587.718 97.5975   8
   1   4   8 1255.71 203.323   7
  -1   4  -8 1171.92 138.512   8
  -1   4  -8 1671.19 180.033   9
   1   4   9 4492.48 376.639   7
   1   4  10 8695.38 558.343   7
   1   4  11 725.895 264.021  13
  -1  -4  11 732.203 236.689   3
   1   4  11 1059.54 232.650   7
  -1  -4  11 669.566 296.218   6
   1   4  12 10871.5 899.471  13
  -1  -4  12 9245.66 749.352   6
  -1  -4  12 11294.7 762.656   3
   1   4  12 11013.4 678.099   7
  -1  -4  13 462.647 216.620   6
  -1  -4  14 190.769 201.619   6
  -1  -4  15 530.502 231.682   6
  -1  -4  16 153.843 156.182   6
  -1  -4  17 274.748 135.020   6
   1  -5  16-73.3538 115.816   6
   1  -5  15 443.522 171.996   6
   1  -5  14 1573.77 330.603   6
   1  -5  13 1817.57 339.387   3
   1  -5  13 1828.12 375.368   6
  -1   5  12 9770.80 866.631  13
   1  -5  12 9127.97 722.473   3
  -1   5  12 9119.66 631.520   7
   1  -5  12 8873.40 739.929   6
  -1   5  11 638.768 281.219  13
   1  -5  11 277.275 145.768   3
  -1   5  11 199.938 118.163   7
   1  -5  11 376.779 179.528   6
  -1   5  10 1829.03 295.718   7
  -1   5   9 789.951 183.818   7
  -1   5   8 2015.39 240.377   7
  -1   5   7 2447.44 282.151  12
  -1   5   7 2595.46 251.934   7
  -1   5   6 10025.4 509.407  12
  -1   5   6 10554.4 453.886   7
   1   5  -5 1129.51 66.8716   8
  -1   5   5 1047.98 162.146  12
  -1   5   4 8798.64 408.929  12
   1   5  -4 8538.58 165.421   8
   1   5  -3 209.534 33.3586   8
  -1   5   2 12610.6 314.519  11
  -1   5   2 13236.7 179.941   9
  -1   5   1 439.105 60.2118   8
  -1   5   0 3454.47 142.595   8
   1  -5  -1 460.905 106.027   1
  -1   5  -1 450.811 62.0095   8
  -1   5  -2 12397.7 299.292   8
  -1  -5   2 12574.7 320.532  10
   1   5   2 12135.5 312.856  11
  -1   5  -3 281.287 68.4908   8
   1  -5  -3 225.629 90.6629   1
   1   5   3 218.646 77.7343  12
   1  -5  -4 8355.14 338.113   1
   1   5   4 8980.32 366.295  12
  -1   5  -4 8900.41 295.666   8
   1   5   5 1267.06 161.089  12
  -1   5  -5 1080.11 113.891   8
   1  -5  -5 1298.95 148.009   1
   1  -5  -6 11296.6 425.275   1
   1   5   6 10322.8 452.766   7
  -1   5  -6 10680.1 370.272   8
  -1   5  -6 10450.4 379.332   9
   1   5   6 10493.7 480.596  12
  -1   5  -7 2498.02 197.437   9
   1   5   7 2343.75 237.309   7
  -1   5  -7 2769.59 201.785   8
  -1   5  -8 2134.98 199.066   9
   1   5   8 2262.11 253.283   7
  -1   5  -8 1900.80 172.832   8
   1   5   9 815.321 193.726   7
   1   5  10 1752.65 296.541   7
   1   5  11 234.699 146.436   7
   1   5  11 340.422 238.703  13
  -1  -5  11 372.574 158.280   3
  -1  -5  11 299.844 194.635   6
  -1  -5  12 9888.08 781.123   6
   1   5  12 9567.62 663.029   7
  -1  -5  12 8654.01 676.047   3
   1   5  12 8423.34 798.732  13
  -1  -5  13 1283.75 298.666   6
  -1  -5  13 2076.63 348.662   3
  -1  -5  14 1777.48 350.431   6
  -1  -5  15 796.251 237.189   6
  -1  -5  16-76.2781 114.753   6
  -1  -5  17 120.765 116.486   6
   1  -6  16 185.367 146.036   6
   1  -6  15 225.205 172.023   6
   1  -6  14 2812.73 413.378   6
   1  -6  14 3025.07 442.035   3
   1  -6  13 921.130 285.999   6
   1  -6  13 738.501 255.177   3
   1  -6  12 6309.21 625.590   6
  -1   6  12 6896.85 542.920   7
   1  -6  12 6854.64 628.802   3
  -1   6  12 6554.88 700.477  13
   1  -6  11 818.788 216.955   6
   1  -6  11 898.790 233.792   3
  -1   6  11 668.484 179.339   7
  -1   6  11 733.203 274.250  13
  -1   6  10 134.576 159.228  13
   1  -6  10 139.688 134.479   6
   1  -6  10 400.986 179.494   3
  -1   6  10 346.913 147.085   7
  -1   6   9 165.244 91.8522   7
  -1   6   8 1412.47 199.707   7
  -1   6   8 1690.23 260.822  12
  -1   6   7 1179.69 174.345   7
  -1   6   7 1065.01 186.393  12
  -1   6   6 4232.37 342.971  12
  -1   6   6 4317.94 301.008   7
  -1   6   5 45559.1 1019.28  12
   1   6  -5 46167.7 435.854   8
  -1   6   4 51084.4 997.872  12
   1   6  -4 50386.3 441.471   8
  -1   6   3 20822.4 572.217  12
   1   6  -3 20283.8 285.945   8
  -1   6   2 733.048 85.7038  10
  -1   6   2 944.674 112.897  11
  -1   6   2 864.146 61.6655   9
  -1   6   1 780.614 83.9676   8
  -1   6   1 634.738 71.4457  10
  -1   6   0 108.082 44.1252   8
  -1   6  -1 781.981 83.2570   8
   1  -6  -1 669.899 124.292   1
   1  -6  -2 853.277 135.273   1
  -1  -6   2 879.209 92.9661  10
   1   6   2 789.337 98.1109  11
  -1   6  -2 783.728 88.1284   8
  -1  -6   2 969.609 102.687   1
   1   6   3 21655.0 520.084  12
   1  -6  -3 20100.8 542.474   1
  -1  -6   3 20504.1 399.789   1
  -1   6  -3 20733.1 424.778   8
   1  -6  -4 48360.8 868.467   1
  -1   6  -4 49769.2 701.687   8
   1   6   5 46146.0 932.681  12
   1  -6  -5 45230.7 876.528   1
  -1   6  -5 45289.3 716.285   8
  -1   6  -6 4115.48 231.984   8
  -1   6  -6 4290.29 249.430   9
   1   6   6 4278.56 300.452   7
   1   6   6 4650.01 327.961  12
   1  -6  -6 4147.02 285.972   1
   1   6   7 1511.82 203.767   7
   1   6   7 1191.49 194.395  12
  -1   6  -7 1368.32 156.870   9
  -1   6  -7 1722.40 162.020   8
  -1   6  -8 1525.16 181.788   9
   1   6   8 1457.88 207.288   7
  -1   6  -8 1802.55 165.954   8
   1   6   9 95.9067 80.0464   7
   1   6  10 529.248 226.269  13
  -1  -6  10 224.296 151.161   6
   1   6  10 257.889 117.979   7
   1   6  11 919.673 302.194  13
  -1  -6  11 504.699 191.580   6
   1   6  11 914.939 213.079   7
  -1  -6  11 829.401 222.800   3
  -1  -6  12 7162.95 676.584   6
   1   6  12 7611.28 756.565  13
   1   6  12 7309.37 568.185   7
  -1  -6  12 7382.74 624.293   3
  -1  -6  13 570.978 234.521   6
   1   6  13 667.680 274.782  13
  -1  -6  13 906.567 258.593   3
  -1  -6  14 2429.22 423.713   6
  -1  -6  15 335.693 210.671   6
  -1  -6  16-129.763 110.585   6
  -1  -6  17 409.710 137.692   6
   1  -7  16 430.462 181.892   6
   1  -7  15 643.396 217.008   6
   1  -7  14 1909.57 356.741   3
   1  -7  14 1215.31 282.278   6
   1  -7  13 1015.85 255.925   6
   1  -7  13 1276.83 288.501   3
  -1   7  12 1392.00 267.357   7
  -1   7  12 1571.80 368.212  13
   1  -7  12 1505.08 327.333   3
   1  -7  12 1054.74 298.974   6
   1  -7  11 196.844 169.835   3
  -1   7  11 3.26346 95.8180   7
  -1   7  11 29.7500 128.715  13
   1  -7  11 264.320 171.218   6
  -1   7  10 992.566 196.471   7
  -1   7  10 1015.10 248.554  13
   1  -7  10 820.691 244.032   6
   1  -7  10 816.070 209.513   3
  -1   7   9 276.128 107.421   7
  -1   7   8 1009.38 208.476  12
  -1   7   8 971.453 173.664   7
  -1   7   7 1221.71 209.293  12
  -1   7   7 1233.34 184.793   7
  -1   7   6 783.587 173.192  12
   1   7  -5 19986.1 307.035   8
  -1   7   5 20362.2 700.100  12
  -1   7   4 7488.68 396.407  12
   1   7  -4 8313.53 199.552   8
  -1   7   3 20326.3 491.324  11
  -1   7   3 19849.9 582.275  12
   1   7  -3 20279.9 318.803   8
  -1   7   2 5109.29 151.595   9
  -1   7   2 5094.45 196.950  10
  -1   7   2 5258.88 231.350  11
  -1   7   1 239.976 67.2698   8
  -1   7   1 154.584 47.3413  10
  -1   7   1 154.589 49.1101   9
  -1   7   0 39631.9 551.494   8
  -1  -7   1 180.545 45.8959  10
   1  -7  -1 218.450 92.2770   1
  -1   7  -1 205.547 59.9660   8
   1  -7  -2 5102.70 287.128   1
  -1   7  -2 4842.16 205.561   8
  -1  -7   2 5180.41 196.446  10
   1   7   2 4886.47 224.108  11
  -1  -7   2 5138.09 239.455   1
  -1   7  -3 20126.2 430.986   8
   1   7   3 20121.5 522.436  12
   1   7   3 19733.2 490.430  11
   1  -7  -3 19991.8 581.954   1
  -1  -7   3 19690.3 440.296   1
  -1   7  -4 8092.47 291.063   8
   1   7   4 8185.24 374.044  12
   1  -7  -4 8012.43 386.529   1
  -1   7  -5 19583.5 475.761   8
   1  -7  -5 19865.4 623.869   1
   1   7   5 20198.5 634.042  12
  -1   7  -5 20489.3 517.827   9
  -1   7  -6 1128.10 121.380   8
   1   7   6 1028.29 165.229  12
   1  -7  -6 1135.26 169.818   1
  -1   7  -6 906.083 128.404   9
   1   7   7 1021.53 177.482  12
   1   7   7 1221.60 193.018   7
  -1   7  -7 1447.12 148.394   8
  -1   7  -7 1298.46 164.916   9
  -1   7  -8 842.544 109.665   8
  -1   7  -8 1061.30 160.423   9
   1   7   8 991.602 176.219   7
  -1   7  -9 407.116 127.969   9
   1   7   9 148.281 88.9657   7
   1   7  10 777.778 179.625   7
  -1  -7  10 866.433 211.920   3
   1   7  10 860.918 259.127  13
  -1  -7  10 1350.49 305.436   6
  -1  -7  11 180.646 144.130   3
   1   7  11 268.923 209.617  13
  -1  -7  11-129.504 181.179   6
   1   7  11 432.257 180.809   7
   1   7  12 1268.51 340.623  13
  -1  -7  12 1732.22 326.350   3
   1   7  12 1736.52 295.662   7
  -1  -7  12 1234.25 309.069   6
  -1  -7  13 1125.49 290.310   6
   1   7  13 1746.89 383.275  13
  -1  -7  13 1629.97 310.420   3
  -1  -7  14 1537.27 315.543   6
  -1  -7  15 986.460 249.642   6
  -1  -7  16 319.788 179.260   6
  -1  -7  17 428.690 141.915   6
   1  -8  16 344.935 179.249   6
   1  -8  15 435.021 186.720   6
   1  -8  14 581.806 221.260   6
   1  -8  14 973.093 275.761   3
   1  -8  13 288.740 168.695   3
   1  -8  13-16.9135 142.499   6
  -1   8  12 274.928 194.024  13
   1  -8  12 111.023 146.222   3
   1  -8  12 165.600 154.553   6
  -1   8  12 407.956 164.194   7
  -1   8  11 473.763 159.335   7
  -1   8  11 295.572 195.602  13
   1  -8  11 439.028 262.810   6
   1  -8  11 236.151 142.681   3
  -1   8  10 231.923 159.714  13
  -1   8  10 462.739 146.968   7
   1  -8  10 300.267 144.479   3
   1  -8  10 298.094 197.948   6
  -1   8   9 574.799 146.923   7
  -1   8   8 1041.37 212.138  12
  -1   8   8 1167.49 200.527   7
  -1   8   7 4037.72 373.961  12
  -1   8   7 3971.29 323.815   7
  -1   8   6 5749.41 411.776  12
  -1   8   5-4.68215 91.7238  12
   1   8  -5 50.8557 31.5929   8
   1   8  -4 14018.5 285.432   8
  -1   8   4 14117.2 553.873  12
  -1   8   3 30845.8 635.450  11
  -1   8   2 4253.78 224.947  11
  -1   8   2 4134.16 152.063   9
  -1   8   1 6385.67 205.987   9
  -1   8   1 5779.74 166.062  10
  -1   8   1 6469.28 246.630   8
  -1   8   0 2779.83 152.670   9
  -1   8   0 2665.11 158.933   8
   1  -8  -1 6290.86 340.175   1
  -1  -8   1 6406.53 175.777  10
  -1   8  -1 6115.94 231.790   8
   1  -8  -2 4141.87 277.891   1
  -1  -8   2 4040.70 173.133  10
  -1  -8   2 4347.87 239.249   1
   1   8   2 3775.40 213.728  11
  -1   8  -2 4173.55 197.737   8
  -1  -8   3 30949.0 609.377   1
   1   8   3 30811.3 638.165  11
  -1   8  -3 31415.6 555.897   8
   1  -8  -3 31145.1 775.225   1
   1   8   4 13783.4 500.898  12
   1  -8  -4 14051.5 537.475   1
  -1   8  -4 13309.2 381.522   8
  -1   8  -4 13746.6 413.452   9
  -1   8  -5-81.9019 83.7130   9
   1   8   5-16.1259 78.6009  12
  -1   8  -5 15.1015 49.0103   8
   1  -8  -5 179.426 110.120   1
  -1   8  -6 5324.78 294.477   9
  -1   8  -6 5479.89 263.836   8
   1  -8  -6 5666.66 373.139   1
   1   8   6 5345.45 366.842  12
  -1   8  -7 4182.75 240.183   8
  -1   8  -7 4245.97 283.710   9
   1  -8  -7 4471.08 331.105   1
   1   8   7 4115.04 345.003  12
   1   8   7 4268.51 333.845   7
  -1   8  -8 1259.17 177.616   9
   1   8   8 1014.24 182.045   7
  -1   8  -9 784.522 160.385   9
   1   8   9 335.186 119.965   7
   1   8  10 204.439 160.722  13
   1   8  10 205.775 104.688   7
  -1  -8  10 204.400 85.0915   3
  -1  -8  10 339.998 149.864   6
   1   8  11 336.385 143.848   7
  -1  -8  11 316.529 152.174   3
   1   8  11 350.136 197.562  13
  -1  -8  11-0.84168 157.199   6
  -1  -8  12 329.453 181.164   6
   1   8  12 338.313 234.580  13
  -1  -8  12 333.460 166.135   3
  -1  -8  13 381.260 186.271   3
  -1  -8  13 305.754 172.079   6
   1   8  13 191.898 192.271  13
  -1  -8  14 792.894 257.592   6
  -1  -8  15 363.071 179.880   6
  -1  -8  16 572.476 175.938   6
  -1  -8  17-0.21622 100.022   6
   1  -9  16 601.580 195.926   6
   1  -9  15 528.015 205.373   6
   1  -9  14 1301.98 301.481   3
   1  -9  14 825.157 275.604   6
   1  -9  13 337.310 201.178   6
   1  -9  13 135.157 143.989   3
  -1   9  13 198.589 182.229  13
   1  -9  12 2888.27 441.378   6
  -1   9  12 2736.45 459.817  13
   1  -9  12 2577.94 393.597   3
  -1   9  11 425.403 194.690  13
   1  -9  11 551.146 183.666   3
   1  -9  11 520.815 238.366   6
  -1   9  11 450.608 161.301   7
  -1   9  10 724.271 178.322   7
   1  -9  10 575.247 232.744   6
  -1   9  10 561.955 218.517  13
  -1   9   9 81.5041 81.2510   7
  -1   9   9 9.08651 98.2496  12
  -1   9   8 1807.19 242.805   7
  -1   9   8 1505.64 248.884  12
  -1   9   7 2185.33 256.124   7
  -1   9   7 2340.81 294.802  12
  -1   9   6 922.655 193.423  12
  -1   9   5 17501.2 687.698  12
   1   9  -5 18652.3 348.179   8
   1   9  -4 11166.0 276.967   8
  -1   9   4 10814.0 505.708  12
  -1   9   3 14842.7 456.229  11
  -1   9   2 4183.77 168.726   9
  -1   9   2 4367.82 239.658  11
  -1   9   1 1181.61 74.3543  10
  -1   9   1 1399.78 115.893   9
  -1   9   1 1503.82 133.006   8
  -1   9   0 4188.42 192.554   9
  -1   9   0 4158.39 207.592   8
  -1   9  -1 1543.21 131.233   9
  -1  -9   1 1324.72 88.4963  10
  -1   9  -1 1387.91 122.903   8
   1  -9  -1 1638.45 197.047   1
  -1   9  -2 4312.47 211.383   8
  -1   9  -2 4471.52 224.240   9
   1  -9  -2 4449.24 315.952   1
   1   9   2 4292.98 236.637  11
  -1  -9   2 4374.32 263.521   1
  -1  -9   3 14141.4 449.790   1
   1  -9  -3 15585.6 569.061   1
   1   9   3 14470.5 457.301  11
  -1   9  -3 15087.1 420.498   9
  -1   9  -3 14742.0 397.746   8
  -1   9  -4 10567.6 377.509   9
   1  -9  -4 10625.7 489.701   1
  -1   9  -4 10291.6 344.125   8
   1   9   4 10940.2 458.167  12
   1  -9  -5 17390.9 647.669   1
  -1   9  -5 16794.7 504.349   9
   1   9   5 17495.6 626.032  12
  -1   9  -5 16902.4 455.768   8
   1   9   6 944.284 174.506  12
   1  -9  -6 1183.33 193.484   1
  -1   9  -6 1100.61 126.448   8
  -1   9  -6 1034.71 151.866   9
  -1   9  -7 1941.69 170.500   8
   1   9   7 2356.46 263.248   7
   1  -9  -7 2528.57 264.552   1
   1   9   7 1993.71 246.227  12
  -1   9  -7 2256.54 225.747   9
   1   9   8 1669.90 236.242   7
  -1   9  -8 1769.68 213.478   9
   1   9   8 1714.15 258.089  12
  -1   9  -9 67.7343 85.3915   9
   1   9   9 54.9028 82.5725   7
  -1  -9  10 432.982 178.512   3
   1   9  10 591.194 176.280   7
   1   9  10 616.661 228.512  13
  -1  -9  10 386.548 174.210   6
  -1  -9  11 374.110 179.864   6
   1   9  11 384.838 231.637  13
  -1  -9  11 584.996 191.979   3
   1   9  11 393.329 144.195   7
  -1  -9  12 2759.44 424.437   6
  -1  -9  12 3074.98 414.482   3
   1   9  12 2442.85 451.309  13
   1   9  13 277.344 239.798  13
  -1  -9  13-20.2112 88.3786   3
  -1  -9  13 288.438 165.493   6
  -1  -9  14 1327.54 319.910   6
  -1  -9  14 1338.34 272.771   3
  -1  -9  15 240.623 180.861   6
  -1  -9  16 675.858 190.900   6
  -1  -9  17 175.330 113.934   6
   1 -10  16 308.867 160.093   6
   1 -10  15 721.189 224.364   6
   1 -10  14 2275.02 383.990   6
   1 -10  14 2466.78 390.646   3
  -1  10  13 1990.80 387.990  13
   1 -10  13 1877.73 369.769   6
   1 -10  13 1800.35 326.676   3
   1 -10  12 1139.05 301.066   6
   1 -10  12 781.857 235.141   3
   1 -10  11 1215.25 325.645   6
  -1  10  11 1052.23 294.987  13
  -1  10  11 1302.91 246.800   7
   1 -10  11 957.761 247.371   3
  -1  10  10 1642.67 256.485   7
   1 -10  10 1541.60 318.086   6
  -1  10  10 2228.63 396.764  13
  -1  10   9 1553.52 239.147   7
  -1  10   9 1178.76 240.436  12
  -1  10   8 1241.55 228.002  12
  -1  10   8 1346.08 212.447   7
  -1  10   7 13178.9 689.632  12
  -1  10   6 3945.26 366.183  12
   1  10  -5 20874.0 389.357   8
  -1  10   5 19662.4 745.898  12
  -1  10   4 819.668 167.693  12
  -1  10   4 927.151 149.884  11
  -1  10   3 3288.50 233.555  11
  -1  10   2 29083.3 625.680  11
  -1  10   1 5836.78 228.265   9
  -1  10   0 22387.2 495.621   8
  -1  10   0 22316.9 462.553   9
   1 -10   0 21863.0 697.303   1
  -1  10  -1 5709.06 252.157   8
  -1  10  -1 5370.75 248.520   9
  -1 -10   1 5000.47 147.017  10
   1 -10  -1 5524.71 355.862   1
  -1 -10   2 28715.6 684.307   1
  -1  10  -2 29504.0 565.620   8
   1 -10  -2 30024.8 813.024   1
   1  10   2 28913.0 624.470  11
  -1  10  -2 29524.6 586.752   9
   1 -10  -3 3091.36 287.083   1
  -1  10  -3 2695.98 196.137   9
  -1  10  -3 2965.65 192.304   8
   1  10   3 2775.99 214.089  11
  -1 -10   3 2743.78 219.833   1
  -1  10  -4 937.051 115.902   8
   1  10   4 1106.27 167.632  12
  -1  10  -4 914.123 126.061   9
   1 -10  -4 1142.17 186.514   1
   1 -10  -5 19338.3 714.097   1
   1  10   5 20297.3 697.892  12
  -1  10  -5 18723.3 556.475   9
  -1  10  -5 19203.8 497.710   8
   1  10   6 3916.21 329.612  12
  -1  10  -6 3984.70 279.121   9
   1 -10  -6 4018.79 343.394   1
  -1  10  -6 4388.97 245.334   8
  -1  10  -7 13496.5 440.594   8
   1 -10  -7 13694.9 637.154   1
   1  10   7 12615.4 617.072  12
  -1  10  -7 13344.0 529.718   9
  -1  10  -8 1209.65 191.360   9
   1  10   8 1327.08 210.569   7
   1  10   8 1406.58 242.246  12
  -1  10  -9 1555.19 216.838   9
   1  10   9 1209.43 216.359   7
  -1 -10  10 1972.52 314.801   3
   1  10  10 1492.36 245.306   7
   1  10  10 1801.65 375.754  13
  -1 -10  10 1490.60 345.488   6
   1  10  11 828.179 269.439  13
   1  10  11 883.355 213.103   7
  -1 -10  11 1086.56 250.340   3
  -1 -10  11 784.547 235.511   6
  -1 -10  12 846.540 257.994   6
  -1 -10  12 994.948 265.499   3
   1  10  12 761.401 267.573  13
  -1 -10  13 1429.07 291.857   6
  -1 -10  13 1791.51 317.867   3
   1  10  13 1970.48 425.610  13
  -1 -10  14 2000.57 455.429   6
  -1 -10  14 2375.81 363.031   3
  -1 -10  15 595.929 260.477   6
  -1 -10  16 143.617 146.144   6
  -1 -10  17 737.211 173.118   6
   1 -11  16 143.606 105.203   6
   1 -11  15 352.757 199.783   6
   1 -11  14 3945.27 503.554   6
   1 -11  14 4496.13 493.053   3
   1 -11  13 1770.13 341.155   3
   1 -11  13 1453.56 314.236   6
  -1  11  13 1632.29 382.792  13
  -1  11  12 2317.05 428.405  13
   1 -11  12 1828.49 349.340   6
   1 -11  12 2422.15 394.564   3
   1 -11  11 1960.76 375.926   6
  -1  11  11 2426.35 330.156   7
  -1  11  11 3060.37 465.177  13
   1 -11  11 3091.51 420.546   3
  -1  11  10 562.517 161.782   7
  -1  11  10 710.833 260.359  13
   1 -11  10 618.777 219.788   6
  -1  11   9 62.6360 101.763  12
  -1  11   9 59.4209 95.2326   7
  -1  11   8 354.529 154.963  12
  -1  11   8 373.190 121.839   7
  -1  11   7 18413.6 830.392  12
  -1  11   6 4340.69 385.103  12
  -1  11   5 8440.57 509.331  12
  -1  11   4 14162.4 611.657  12
  -1  11   4 14272.4 517.005  11
  -1  11   3 8427.42 378.729  11
  -1  11   2 3250.05 236.062  11
  -1  11   1 1124.39 116.680   9
   1 -11   0 2161.90 234.960   1
  -1  11   0 2337.69 169.424   9
  -1  11   0 2292.05 177.368   8
  -1  11  -1 938.653 118.255   9
  -1  11  -1 1082.95 125.982   8
   1 -11  -1 1419.72 189.470   1
  -1 -11   1 1167.19 169.872   1
   1 -11  -2 3429.96 305.245   1
   1  11   2 3358.55 230.309  11
  -1 -11   2 3425.62 262.145   1
  -1  11  -2 3484.53 210.361   8
  -1  11  -2 3411.67 216.347   9
  -1 -11   3 8466.37 397.826   1
   1 -11  -3 8815.80 477.861   1
  -1  11  -3 8755.36 332.008   8
   1  11   3 8671.05 383.782  11
  -1  11  -3 8836.11 356.181   9
  -1  11  -4 13982.8 466.253   9
   1  11   4 14419.9 519.091  11
   1  11   4 14307.9 562.168  12
  -1  11  -4 14218.8 426.880   8
   1 -11  -4 14870.1 636.570   1
  -1  11  -5 8047.67 378.257   9
  -1  11  -5 8097.55 331.454   8
   1  11   5 8255.02 464.071  12
   1 -11  -5 7916.82 489.404   1
  -1  11  -6 3922.93 285.005   9
  -1  11  -6 4277.62 250.146   8
   1 -11  -6 4119.23 365.501   1
   1  11   6 4466.61 363.502  12
  -1  11  -7 18277.2 639.913   9
   1 -11  -7 18864.3 779.752   1
  -1  11  -7 18884.3 528.729   8
   1  11   7 17596.5 753.098  12
   1  11   8 462.067 144.210   7
   1  11   8 263.363 132.665  12
  -1  11  -8 467.780 138.705   9
   1  11   9 179.932 107.650   7
   1  11  10 521.286 219.337  13
  -1 -11  10 529.266 232.736   6
   1  11  10 524.890 171.200   7
   1  11  11 2554.55 339.071   7
  -1 -11  11 2367.50 360.172   3
  -1 -11  11 2022.31 350.732   6
   1  11  11 2334.69 439.100  13
  -1 -11  12 2369.28 368.817   3
  -1 -11  12 2088.54 366.321   6
   1  11  12 2230.67 432.860  13
  -1 -11  13 1459.42 296.800   3
   1  11  13 1693.38 406.261  13
  -1 -11  13 1360.67 317.880   6
  -1 -11  14 4586.02 471.723   3
  -1 -11  14 4198.94 492.859   6
   1  11  14 4277.36 564.408  13
  -1 -11  15 584.165 216.215   6
  -1 -11  16 105.467 111.207   6
  -1 -11  17 1131.49 199.583   6
   1 -12  16-95.0918 113.324   6
   1 -12  15 2753.26 355.025   3
   1 -12  15 2122.92 327.639   6
   1 -12  14 166.686 169.520   3
   1 -12  14 178.329 134.209   6
   1 -12  13 1087.74 285.442   3
  -1  12  13 1115.25 323.096  13
   1 -12  13 804.618 260.512   6
   1 -12  12 732.116 261.485   6
  -1  12  12 884.285 295.036  13
   1 -12  12 671.487 226.208   3
   1 -12  11 225.549 166.116   6
  -1  12  11 22.7558 94.9026   7
   1 -12  11-151.935 156.744   3
  -1  12  11 123.335 138.433  13
  -1  12  10 451.891 214.989  13
   1 -12  10 297.396 211.052   6
  -1  12  10 283.962 129.138   7
   1 -12   9 2675.99 383.109   6
  -1  12   9 2997.64 443.383  13
  -1  12   9 2684.81 323.562   7
  -1  12   9 2470.67 353.006  12
  -1  12   8 4980.86 467.013  12
  -1  12   8 4731.52 399.302   7
  -1  12   7 9196.11 603.872  12
  -1  12   6 2800.42 325.536  12
  -1  12   5 7764.69 497.032  12
  -1  12   4 1791.63 185.333  11
  -1  12   4 2165.87 261.021  12
  -1  12   3 6210.21 344.501  11
  -1  12   1 7764.05 296.022   9
   1 -12   0 197.419 93.2098   1
  -1  12   0 281.606 80.5847   9
  -1  12   0 237.573 74.7793   8
   1 -12  -1 8547.71 479.291   1
  -1  12  -1 8291.01 330.580   9
  -1 -12   1 8264.78 425.272   1
  -1  12  -1 7781.13 324.792   8
  -1  12  -2 88.4072 71.9769   9
   1 -12  -2 96.9680 98.5474   1
  -1 -12   2 112.861 95.1148   1
  -1  12  -2 153.105 72.7411   8
   1  12   2 254.483 117.048  11
   1  12   3 6232.45 340.711  11
  -1 -12   3 6260.66 362.485   1
  -1  12  -3 6001.44 287.579   8
  -1  12  -3 5928.72 312.982   9
   1 -12  -3 5829.15 418.323   1
   1  12   4 1814.68 181.905  11
   1  12   4 2232.69 234.643  12
   1 -12  -4 2309.96 271.905   1
  -1  12  -4 1991.03 170.009   8
  -1  12  -4 2025.23 195.530   9
   1  12   5 7870.69 460.119  12
  -1  12  -5 7150.10 372.102   9
   1 -12  -5 7297.29 476.922   1
  -1  12  -5 7554.52 331.890   8
  -1  12  -6 2584.12 244.475   9
   1  12   6 2629.21 287.570  12
  -1  12  -6 2681.00 204.280   8
   1 -12  -6 2459.81 289.572   1
  -1  12  -7 9266.98 469.507   9
  -1  12  -7 9394.48 379.739   8
   1  12   7 8828.75 551.958  12
   1 -12  -7 9887.58 584.382   1
  -1  12  -8 5089.12 367.849   9
   1  12   8 4807.37 410.665   7
   1  12   8 4882.68 432.196  12
   1  12   9 2476.75 314.826   7
  -1 -12   9 2288.17 360.864   6
   1  12   9 2280.31 324.343  12
   1  12   9 3129.39 448.751  13
   1  12  10 98.1464 87.0863   7
   1  12  10-31.0973 128.526  13
  -1 -12  10 234.370 165.228   6
   1  12  11-162.379 124.105   7
   1  12  11 117.359 186.228  13
  -1 -12  11-13.9425 127.844   3
  -1 -12  11 185.175 171.052   6
  -1 -12  12 906.199 282.588   6
  -1 -12  12 897.560 245.487   3
   1  12  12 897.823 316.599  13
  -1 -12  13 980.474 244.202   3
  -1 -12  13 709.538 242.991   6
   1  12  13 588.958 264.475  13
  -1 -12  14 214.696 185.928   3
   1  12  14 364.467 222.341  13
  -1 -12  14-143.745 150.120   6
  -1 -12  15 2731.85 380.553   6
  -1 -12  16 76.8629 123.981   6
  -1 -12  17 281.719 110.087   6
   1 -13  16 15.8861 96.3550   6
   1 -13  15 1448.53 271.118   3
   1 -13  15 1100.07 258.957   6
   1 -13  14 342.275 191.791   6
   1 -13  14 570.880 210.955   3
  -1  13  13 417.022 214.872  13
   1 -13  13 393.551 196.674   3
   1 -13  13 288.594 168.580   6
   1 -13  12 103.366 175.083   6
  -1  13  12 9.32288 147.996  13
   1 -13  12 80.2658 118.386   3
  -1  13  11 634.270 221.093  13
  -1  13  11 272.252 129.430   7
   1 -13  11 501.842 211.498   6
  -1  13  10 64.1069 115.315  12
  -1  13  10 327.579 131.726   7
   1 -13  10 140.987 211.779   6
  -1  13  10 567.075 222.305  13
   1 -13   9 257.912 176.997   6
  -1  13   9 468.858 222.759  13
  -1  13   9 250.726 150.765  12
  -1  13   9 264.416 133.150   7
  -1  13   8 88.4597 118.100  12
  -1  13   8 45.3245 84.5338   7
  -1  13   7 6911.85 533.303  12
  -1  13   6 251.736 133.504  12
  -1  13   5 4712.79 400.655  12
  -1  13   4 6312.66 373.873  11
  -1  13   4 6220.56 442.598  12
  -1  13   3 28726.7 745.076  11
  -1  13   1 44.1836 63.9384   9
   1 -13   0 2699.62 290.219   1
  -1  13   0 2505.28 197.864   8
  -1  13   0 2774.68 199.851   9
  -1  13  -1-10.9057 65.8611   9
   1 -13  -1 8.70234 117.848   1
  -1 -13   1 17.8451 85.1861   1
  -1  13  -1-42.2561 64.0750   8
  -1 -13   2 354.796 131.588   1
  -1  13  -2 210.069 72.0621   8
  -1  13  -2 236.435 87.3490   9
   1 -13  -2 395.939 146.590   1
   1 -13  -3 29033.2 941.535   1
   1  13   3 28837.7 754.245  11
  -1  13  -3 27160.0 632.044   8
  -1 -13   3 28921.0 808.748   1
  -1  13  -3 28875.2 689.275   9
   1 -13  -4 6460.76 457.948   1
   1  13   4 6548.13 377.381  11
  -1  13  -4 6133.44 342.378   9
   1  13   4 6629.49 418.402  12
  -1  13  -4 6017.25 304.119   8
  -1  13  -5 5002.60 281.407   8
  -1  13  -5 4581.43 310.644   9
   1  13   5 4948.70 376.180  12
   1 -13  -5 5082.87 416.774   1
   1 -13  -6 347.143 168.443   1
   1  13   6 197.141 125.445  12
  -1  13  -6 206.781 81.2546   8
  -1  13  -6 248.810 112.345   9
   1  13   7 6810.00 494.015  12
  -1  13  -7 6869.36 330.216   8
  -1  13  -7 6806.84 415.614   9
   1 -13  -7 6983.45 516.255   1
  -1  13  -8-6.64232 81.4793   9
   1  13   8 4.47646 87.1189   7
   1  13   8 119.334 116.106  12
   1  13   9 124.620 162.174  13
   1  13   9 110.878 112.088  12
  -1 -13   9 335.711 167.226   6
   1  13   9 257.236 127.177   7
  -1 -13  10 203.985 177.835   6
   1  13  10 254.285 137.056   7
   1  13  10 231.603 221.966  13
   1  13  11 446.960 163.014   7
  -1 -13  11 267.620 125.306   3
  -1 -13  11 458.267 193.567   6
   1  13  11 123.289 167.806  13
  -1 -13  12 144.774 250.573   6
  -1 -13  12 260.125 159.998   3
   1  13  12 381.236 223.561  13
  -1 -13  13 332.723 165.745   3
  -1 -13  13 351.033 188.709   6
   1  13  13 324.696 224.032  13
   1  13  14 650.768 242.843  13
  -1 -13  14 487.620 182.281   3
  -1 -13  14 519.640 213.608   6
  -1 -13  15 998.001 230.306   6
  -1 -13  16-18.2390 94.6623   6
  -1 -13  17 434.986 118.688   6
   1 -14  16 269.458 135.079   6
   1 -14  15 566.187 202.775   6
   1 -14  15 1147.56 251.153   3
   1 -14  14 2713.19 405.553   6
   1 -14  14 2830.19 383.996   3
  -1  14  13 1144.52 328.946  13
   1 -14  13 559.309 209.804   3
   1 -14  13 635.384 261.183   6
   1 -14  12-83.2589 181.850   6
  -1  14  12 240.187 213.135  13
   1 -14  12-101.879 120.936   3
   1 -14  11 108.108 182.208   6
  -1  14  11-205.418 191.882  13
  -1  14  10 1722.78 280.654   7
  -1  14  10 1545.57 307.264  12
   1 -14  10 1183.43 312.792   6
  -1  14  10 1709.22 370.213  13
  -1  14   9 154.799 109.253   7
   1 -14   9 68.3375 134.931   6
  -1  14   9 26.0365 114.195  12
  -1  14   9 512.924 199.702   5
  -1  14   9 211.821 204.838  13
  -1  14   8 3841.78 435.583  12
  -1 -14  -8 3235.00 360.802   1
  -1  14   8 3508.76 359.372   7
  -1  14   7 104.703 110.678  12
  -1  14   6 230.631 142.350  12
  -1  14   5 1988.68 282.977  12
  -1  14   4 4814.99 337.391  11
  -1  14   3 3075.36 261.693  11
   1 -14   0-105.504 121.172   1
  -1 -14   0 102.336 113.057   1
  -1  14   0-13.4748 78.4503   9
  -1 -14   1 2877.44 283.370   1
  -1  14  -1 3009.75 221.521   9
   1 -14  -1 2832.60 304.022   1
  -1  14  -1 2795.96 217.466   8
   1 -14  -2 3091.48 329.735   1
  -1  14  -2 3169.09 233.262   8
  -1 -14   2 3079.85 297.045   1
  -1  14  -2 2986.70 228.218   9
  -1  14  -3 3054.07 226.322   8
   1 -14  -3 3441.91 351.192   1
   1  14   3 3214.19 272.581  11
  -1 -14   3 2986.80 288.826   1
  -1  14  -3 3018.51 243.834   9
   1 -14  -4 5225.39 433.732   1
  -1  14  -4 4719.03 316.050   9
   1  14   4 4618.91 361.899  12
   1  14   4 4868.42 340.045  11
  -1  14  -4 4875.57 284.695   8
   1  14   5 1681.07 235.461  12
   1 -14  -5 1958.85 285.887   1
  -1  14  -5 2091.66 194.564   8
  -1  14  -5 1877.87 204.467   9
  -1  14  -6 144.895 72.8290   8
   1 -14  -6 266.857 155.089   1
   1  14   6 279.521 124.306  12
  -1  14  -6 172.721 107.222   9
   1  14   7 258.279 153.743  12
  -1  14  -7 72.9845 81.1654   9
   1 -14  -7 209.964 147.153   1
   1  14   8 3691.36 398.297  12
   1  14   8 3374.31 359.908   7
   1  14   9-10.3526 97.8212   7
   1  14   9 30.8236 113.144  12
   1  14   9 340.578 209.880  13
  -1 -14   9 1.90469 151.570   6
   1  14  10 1687.00 288.390   7
   1  14  10 1424.24 335.815  13
  -1 -14  10 1624.55 316.489   6
   1  14  11 75.4619 128.629  13
  -1 -14  11 109.984 98.4749   3
  -1 -14  11 47.9452 157.405   6
  -1 -14  12 318.353 138.465   3
  -1 -14  12 3.04123 154.155   6
   1  14  12 230.385 198.572  13
   1  14  13 522.677 254.054  13
  -1 -14  13 484.733 201.328   6
  -1 -14  13 644.873 204.842   3
  -1 -14  14 3009.54 415.257   6
  -1 -14  14 2570.65 341.741   3
   1  14  14 3397.59 496.502  13
  -1 -14  15 745.486 215.220   6
  -1 -14  16 209.810 130.565   6
  -1 -14  17 821.285 156.375   6
   1 -15  15 399.642 161.298   6
   1 -15  15 670.209 198.243   3
   1 -15  14 1507.94 281.050   3
   1 -15  14 1524.50 305.859   6
   1 -15  13 860.221 255.615   3
   1 -15  13 748.827 286.239   6
  -1  15  13 847.564 288.692  13
  -1  15  12-51.1915 143.177  13
   1 -15  12-70.7782 142.244   3
   1 -15  12-86.1839 196.850   6
  -1  15  11 442.775 234.695  13
   1 -15  11-1.71466 152.913   6
  -1  15  10 1788.89 337.800   5
  -1  15  10 1545.45 273.402   7
   1 -15  10 1820.96 354.367   6
  -1  15  10 1654.45 364.355  13
  -1  15  10 1532.35 310.756  12
  -1  15   9 1867.95 315.227  12
   1 -15   9 2098.60 374.564   6
  -1  15   9 1723.13 337.207   5
  -1  15   9 2512.35 414.907  13
  -1  15   9 1731.89 287.919   7
   1 -15   8 244.203 126.639   4
  -1 -15  -8 382.174 158.410   1
  -1  15   8 304.067 133.755  12
  -1  15   7 2348.28 323.292  12
  -1  15   6 1794.11 288.472  12
  -1  15   5 1012.55 211.555  12
  -1  15   4 7720.72 441.646  11
  -1  15   3 1078.43 177.043  11
  -1  15   0 33119.9 712.373   9
   1 -15   0 33237.1 1065.21   1
  -1 -15   0 32406.6 965.733   1
   1 -15  -1 24544.0 918.255   1
  -1 -15   1 23398.9 807.259   1
  -1  15  -1 24164.5 629.860   9
  -1  15  -1 22777.7 623.442   8
  -1  15  -2 3246.51 249.557   8
  -1  15  -2 3428.71 261.359   9
  -1 -15   2 3389.60 319.094   1
   1 -15  -2 3393.32 366.658   1
  -1 -15   3 1003.43 189.103   1
   1  15   3 898.248 168.799  11
  -1  15  -3 998.708 139.767   8
  -1  15  -3 1035.87 161.696   9
   1 -15  -3 1376.67 238.099   1
   1 -15  -4 7731.90 549.894   1
   1  15   4 8295.12 453.965  11
  -1  15  -4 7227.98 358.828   8
  -1  15  -4 7443.14 403.994   9
  -1  15  -5 770.378 123.214   8
   1  15   5 759.843 168.979  12
  -1  15  -5 851.035 155.762   9
   1 -15  -5 846.945 205.605   1
  -1  15  -6 1737.10 222.282   9
  -1  15  -6 1398.20 159.800   8
   1 -15  -6 1370.52 246.563   1
   1  15   6 1660.75 266.839  12
   1  15   7 2537.61 320.066  12
  -1  15  -7 2242.19 252.550   9
   1 -15  -7 2552.31 349.291   1
   1  15   8 181.960 107.509  12
  -1 -15   9 1774.11 342.867   6
   1  15   9 2088.80 316.051   7
   1  15   9 2207.75 413.095  13
   1  15   9 1618.23 283.586  12
  -1 -15  10 1496.25 332.329   6
   1  15  10 1753.31 418.036  13
   1  15  10 1779.23 288.560   7
  -1 -15  11 98.8661 156.961   6
   1  15  11 204.387 167.654  13
  -1 -15  11 181.473 133.897   3
  -1 -15  12 176.487 165.905   6
   1  15  12-173.353 154.096  13
  -1 -15  12 15.3377 119.945   3
   1  15  13 782.554 277.381  13
  -1 -15  13 662.131 225.433   6
  -1 -15  13 957.975 222.429   3
  -1 -15  14 1826.97 293.035   3
   1  15  14 1437.51 343.836  13
  -1 -15  14 1434.01 317.434   6
  -1 -15  15 446.787 161.617   6
  -1 -15  16 328.500 147.317   6
   1 -16  15 387.691 157.396   3
   1 -16  15 489.288 178.051   6
   1 -16  14 54.3327 159.850   6
   1 -16  14 187.103 138.119   3
   1 -16  13 413.140 197.157   6
   1 -16  13 495.405 181.793   3
  -1  16  13 292.073 163.713  13
   1 -16  12 252.518 184.932   6
  -1  16  12 549.083 229.871  13
   1 -16  12 420.595 157.092   3
  -1  16  11 309.577 196.686  13
   1 -16  11 131.792 166.649   6
  -1  16  10 858.115 208.388   7
  -1  16  10 1121.13 307.760  13
  -1  16  10 1244.61 287.922  12
  -1  16  10 926.901 245.027   5
   1 -16  10 794.839 290.539   6
  -1  16   9 426.071 191.651   5
   1 -16   9 478.398 211.604   6
  -1  16   9 317.444 150.403   7
  -1  16   9 322.244 186.179  13
  -1  16   9 313.721 148.502  12
   1 -16   8 1195.54 208.774   4
  -1  16   8 1092.35 242.979  12
   1 -16   8 991.886 242.092   6
  -1 -16  -8 1493.69 273.552   1
  -1  16   8 1424.54 313.970  13
  -1  16   7 1513.03 272.008  12
  -1 -16  -7 1319.88 261.012   1
  -1  16   6 647.479 181.870  12
  -1  16   5 42.0344 101.611  12
  -1  16   4 1727.30 212.355  11
  -1  16   3 200.813 115.866  11
  -1 -16  -1 28991.7 979.305   1
   1 -16   0 1068.47 246.233   1
  -1 -16   0 825.503 218.795   1
  -1 -16   1 26965.5 906.479   1
   1 -16  -1 28645.3 1030.99   1
  -1  16  -1 28258.1 712.745   9
  -1  16  -2 8162.61 392.582   8
  -1  16  -2 8213.27 404.702   9
   1 -16  -2 7773.71 545.452   1
  -1 -16   2 7833.97 501.552   1
   1  16   2 8666.27 465.877  11
  -1  16  -3 162.058 90.9121   9
  -1 -16   3 205.084 101.516   1
   1 -16  -3 318.216 167.350   1
  -1  16  -3 243.375 94.5334   8
   1  16   3 430.820 132.650  11
   1  16   4 2108.26 243.222  11
   1 -16  -4 1822.46 290.043   1
  -1  16  -4 1876.26 209.195   9
  -1  16  -4 1780.72 196.216   8
  -1  16  -5 20.3061 78.6964   9
   1 -16  -5-70.1030 140.995   1
  -1  16  -5 45.0612 52.9933   8
   1  16   5-65.3366 84.8204  12
   1 -16  -6 747.997 216.583   1
  -1  16  -6 598.188 115.351   8
  -1  16  -6 787.222 168.498   9
   1  16   6 558.655 176.244  12
   1 -16  -7 1050.68 231.386   1
   1  16   7 1478.95 257.870  12
  -1 -16   8 1240.05 214.924   4
   1  16   8 1468.96 271.758  12
   1  16   9 228.305 116.165  12
   1  16   9 370.522 163.929   7
   1  16   9 279.154 198.567  13
   1  16  10 963.846 275.195  13
  -1 -16  10 777.017 256.460   6
   1  16  10 957.718 228.770   7
  -1 -16  11 124.163 139.251   6
   1  16  11 383.759 220.614  13
  -1 -16  11-21.4343 94.5977   3
  -1 -16  12 237.966 211.792   6
  -1 -16  12 548.397 181.539   3
   1  16  12 432.151 221.384  13
  -1 -16  13 291.947 185.651   6
  -1 -16  13 583.398 185.733   3
   1  16  13 674.568 266.428  13
   1  16  14-58.9306 127.244  13
  -1 -16  14-23.1374 95.8288   3
  -1 -16  14 88.9490 148.688   6
  -1 -16  15 378.380 158.566   6
  -1 -16  16 920.260 185.387   6
   1 -17  15-30.7982 101.194   6
   1 -17  15 251.809 116.706   3
   1 -17  14 285.070 145.814   3
   1 -17  14 314.770 179.897   6
  -1  17  13 106.276 143.645  13
   1 -17  13 131.996 100.457   3
   1 -17  13 52.7452 124.136   6
  -1  17  12 849.465 275.628  13
   1 -17  12 551.197 225.811   6
   1 -17  12 384.278 139.974   3
  -1  17  11 130.910 124.567   5
   1 -17  11 456.339 209.165   6
  -1  17  11 280.447 171.882  13
   1 -17  10 80.4776 127.023   6
  -1  17  10 238.364 134.434   7
  -1  17  10 476.117 221.047   5
  -1  17  10 193.295 161.492  13
  -1  17  10 506.405 390.252  12
  -1  17   9 1046.19 251.516  12
  -1  17   9 849.553 254.378   5
  -1  17   9 1459.17 332.406  13
   1 -17   9 1690.46 330.156   6
  -1  17   9 1172.14 244.149   7
   1 -17   9 1227.92 238.659   4
   1 -17   8 797.319 253.981   6
  -1  17   8 910.889 254.188  12
   1 -17   8 793.940 183.819   4
  -1 -17  -8 742.745 203.736   1
  -1  17   8 1012.68 279.322  13
  -1  17   7 344.893 166.667  12
  -1 -17  -7 116.057 127.334   1
  -1  17   6 1660.62 289.054  12
  -1 -17  -6 1952.54 300.934   1
  -1  17   5 1159.66 234.726  12
  -1 -17  -5 962.592 208.562   1
  -1 -17  -4 236.791 147.111   1
  -1  17   4 322.674 105.233  11
  -1  17   3 273.107 120.646  11
  -1 -17  -3 407.678 162.773   1
  -1 -17  -2 1532.61 260.608   1
  -1  17   2 2358.78 352.044  11
  -1 -17  -1 522.291 176.796   1
  -1 -17   0 62697.6 1463.61   1
   1 -17   0 64544.2 1609.27   1
   1 -17  -1 689.520 221.636   1
  -1 -17   1 755.658 187.090   1
   1 -17  -2 1483.18 257.996   1
   1  17   2 1999.09 287.905  11
  -1  17  -2 1381.03 174.939   8
  -1 -17   2 1603.51 243.531   1
  -1  17  -2 1292.74 174.582   9
  -1  17  -3 328.747 103.800   8
  -1 -17   3 311.946 131.202   1
  -1  17  -3 396.456 126.686   9
   1  17   3 334.127 122.617  11
   1 -17  -3 297.796 171.640   1
   1  17   4 192.151 107.048  11
  -1  17  -4 370.783 101.293   8
  -1  17  -4 257.245 104.252   9
   1 -17  -4 486.360 188.398   1
   1  17   5 963.354 207.643  12
  -1  17  -5 948.247 174.356   9
  -1  17  -5 989.177 150.434   8
   1 -17  -5 1011.47 241.251   1
   1  17   6 1660.82 269.946  12
   1 -17  -6 1510.52 272.853   1
  -1  17  -6 1515.16 182.780   8
   1  17   7 165.875 100.660  12
   1 -17  -7 308.335 162.273   1
  -1 -17   8 677.061 172.742   4
  -1 -17   8 863.417 294.191   6
   1  17   8 561.401 177.428  12
   1  17   9 1325.31 268.511   7
   1  17   9 936.669 213.386  12
  -1 -17   9 973.343 262.336   6
   1  17   9 994.996 293.310  13
   1  17  10-36.8692 100.667   7
  -1 -17  10 50.7159 169.488   6
   1  17  10 240.093 182.140  13
  -1 -17  11 351.412 174.984   6
   1  17  11 254.350 198.651  13
  -1 -17  12 720.585 250.727   6
  -1 -17  12 550.266 172.192   3
   1  17  12 517.593 206.744  13
  -1 -17  13-82.5519 153.818   6
  -1 -17  13 48.1994 91.2828   3
   1  17  13 57.7610 153.295  13
  -1 -17  14 259.309 136.942   3
  -1 -17  14 140.656 165.664   6
   1  17  14 101.656 111.710  13
  -1 -17  15 98.4023 126.341   6
  -1 -17  16-18.1712 81.8053   6
   1 -18  15 205.189 102.260   3
   1 -18  14 57.6983 109.965   3
   1 -18  14 562.326 200.271   6
  -1  18  13 119.701 157.214  13
   1 -18  13-112.062 143.353   6
   1 -18  13 309.133 147.784   3
   1 -18  12 62.3268 108.924   3
   1 -18  12 96.2382 152.409   6
  -1  18  12 91.6940 157.719  13
  -1  18  11 274.405 177.474   5
   1 -18  11 311.415 182.740   6
  -1  18  11-44.3027 147.637  13
  -1  18  10 2317.05 425.525  13
   1 -18  10 1865.02 370.816   6
  -1  18  10 2195.95 391.488   5
   1 -18   9 785.043 169.515   4
   1 -18   9 815.241 267.309   6
  -1  18   9 738.285 246.924   5
  -1  18   9 677.910 193.150  12
  -1  18   9 982.744 230.276   7
  -1  18   9 1040.41 255.936  13
   1 -18   8 914.297 253.162   6
  -1 -18  -8 797.650 238.897   1
   1 -18   8 743.425 181.657   2
  -1  18   8 713.230 223.816  13
   1 -18   8 679.675 209.018   4
  -1  18   8 789.272 217.741  12
  -1  18   7 2039.75 334.947  12
   1 -18   7 2204.48 301.497   4
  -1 -18  -7 1655.76 296.455   1
  -1 -18  -6 201.920 100.476   1
  -1  18   6 205.467 147.724  12
  -1 -18  -5 1350.14 265.206   1
  -1  18   5 1343.80 264.656  12
  -1 -18  -4-122.751 137.162   1
  -1  18   4-32.1952 96.5929  11
  -1 -18  -3 6934.53 548.930   1
  -1  18   3 6581.02 432.891  11
  -1 -18  -2 4085.17 409.731   1
  -1  18   2 5192.66 395.436  11
  -1 -18  -1 7335.88 545.821   1
   1 -18   0 2691.60 356.775   1
  -1 -18   0 2689.00 376.800   1
  -1 -18   1 6704.32 501.085   1
   1 -18  -1 7643.25 579.617   1
  -1 -18   2 3779.38 379.000   1
   1  18   2 4313.73 349.320  11
   1 -18  -2 4413.27 453.753   1
  -1  18  -3 6739.77 403.564   9
   1 -18  -3 7067.46 568.255   1
   1  18   3 7125.35 450.238  11
  -1 -18   3 6711.50 488.328   1
  -1  18  -3 6486.64 376.543   8
  -1  18  -4 260.445 126.173   9
   1 -18  -4 109.662 117.555   1
  -1  18  -4 47.9857 53.8509   8
   1  18   4-130.037 126.314  11
  -1  18  -5 1337.29 173.720   8
   1 -18  -5 1684.02 286.836   1
   1  18   5 1260.00 246.688  12
  -1  18  -6 369.043 117.112   8
   1  18   6 298.691 157.049  12
   1 -18  -6 293.889 150.340   1
   1 -18  -7 1513.71 288.343   1
   1  18   7 1887.68 297.469  12
   1  18   8 616.288 183.685  12
  -1 -18   8 845.828 180.671   4
  -1 -18   8 436.673 155.516   6
   1  18   9 475.003 198.368  13
   1  18   9 888.796 218.571   7
  -1 -18   9 993.746 291.575   6
  -1 -18  10 2030.97 393.694   6
   1  18  10 2513.21 469.256  13
   1  18  11 173.829 160.876  13
  -1 -18  11 193.519 123.878   6
  -1 -18  12 336.582 189.475   6
   1  18  12 359.641 221.220  13
  -1 -18  12 83.6677 116.267   3
   1  18  13 180.337 161.761  13
  -1 -18  13 191.869 164.458   6
  -1 -18  13 78.0974 113.496   3
   1  18  14-70.9979 107.956  13
  -1 -18  14 21.8838 130.266   6
  -1 -18  14 70.3206 78.1866   3
  -1 -18  15-4.45410 95.5262   6
  -1 -18  16-3.66418 73.4501   6
   1 -19  15 220.835 106.498   3
   1 -19  14-142.895 128.421   6
   1 -19  14 152.079 105.163   3
  -1  19  13 42.6529 122.040  13
   1 -19  13 70.1240 96.9079   3
   1 -19  12 19.8879 127.834   3
  -1  19  12 350.859 207.164  13
   1 -19  12 371.997 196.104   6
  -1  19  11 421.380 230.201  13
   1 -19  11 305.373 180.279   6
  -1  19  11 294.948 155.931   5
  -1  19  10 253.082 161.967   5
  -1  19  10 414.067 184.841  13
   1 -19  10 380.397 200.339   6
  -1  19   9 875.860 282.266  13
   1 -19   9 685.377 188.131   4
  -1  19   9 732.145 252.572   5
  -1  19   9 589.859 204.773  12
   1 -19   9 681.084 247.685   6
  -1  19   9 852.670 219.633   7
   1 -19   8 300.895 130.669   2
   1 -19   8 310.250 175.987   4
   1 -19   8 334.215 173.511   6
  -1 -19  -8 391.007 200.932   1
  -1  19   8 223.708 120.593  12
  -1  19   7 7377.14 633.930  12
  -1 -19  -7 6982.34 617.016   1
   1 -19   7 6953.81 524.258   4
   1 -19   7 5758.96 480.406   2
  -1 -19  -6 468.215 174.604   1
  -1  19   6 386.052 160.346  12
  -1  19   5 1080.67 241.891  12
  -1 -19  -5 1094.58 246.760   1
  -1  19   4 570.023 155.224  11
  -1 -19  -4 489.139 172.150   1
  -1 -19  -3 669.675 198.562   1
  -1  19   3 833.361 163.432  11
  -1  19   2 8061.97 481.710  11
  -1 -19  -2 7205.01 565.241   1
  -1 -19  -1 11548.1 701.146   1
  -1 -19   0 11353.6 686.057   1
  -1 -19   1 11356.4 671.920   1
   1 -19  -1 11869.4 753.070   1
   1  19   2 7797.46 477.052  11
   1 -19  -2 6750.94 578.500   1
  -1 -19   2 7147.82 531.899   1
   1 -19  -3 1013.97 260.742   1
   1  19   3 982.429 201.569  11
   1  19   4 415.831 114.599  11
  -1  19  -4 633.654 141.016   8
   1 -19  -4 464.485 131.366   1
  -1  19  -5 1235.16 179.292   8
   1 -19  -5 1117.04 256.674   1
   1  19   5 1089.97 242.522  12
   1 -19  -6 61.8273 118.988   1
   1  19   6 233.644 139.112  12
  -1 -19   7 6138.69 447.693   2
  -1 -19   7 6323.13 467.910   4
   1 -19  -7 6708.46 596.776   1
   1  19   7 6822.31 575.261  12
  -1 -19   8 218.984 152.774   6
   1  19   8 266.164 177.404  12
  -1 -19   8 171.757 117.326   4
  -1 -19   9 393.140 182.105   6
   1  19   9 849.778 227.049   7
   1  19   9 1082.09 296.876  13
   1  19  10 313.092 197.156  13
  -1 -19  10 658.230 264.212   6
   1  19  11 263.380 239.498  13
  -1 -19  11 334.914 155.222   6
   1  19  12 173.541 196.905  13
  -1 -19  12 457.044 229.467   6
  -1 -19  12 40.7633 88.8860   3
  -1 -19  13 296.168 122.640   3
  -1 -19  13-134.373 139.202   6
   1  19  13 309.978 152.717  13
  -1 -19  14 130.173 108.633   6
   1  19  14 121.469 123.646  13
  -1 -19  14 185.163 97.3259   3
  -1 -19  15 20.0161 110.822   6
   1 -20  15 96.1709 92.5525   3
   1 -20  14 27.0864 79.3552   3
   1 -20  13-116.461 90.5830   3
   1 -20  13-73.3135 122.528   6
  -1  20  13 114.588 126.174  13
  -1  20  12 523.553 173.710   5
  -1  20  12 383.023 190.726  13
   1 -20  12 350.338 216.458   6
   1 -20  12 386.490 172.757   3
  -1  20  11-216.347 133.646   5
   1 -20  11-19.1435 133.464   6
  -1  20  11-53.5706 144.561  13
   1 -20  10 904.473 240.754   6
  -1  20  10 861.852 264.060   5
  -1  20  10 728.748 269.546  13
  -1  20   9 2155.67 403.800   5
  -1  20   9 1842.59 388.508  13
   1 -20   9 1886.51 347.959   6
  -1  20   9 1780.55 346.626  12
  -1  20   9 1719.15 313.064   7
   1 -20   9 1970.09 291.880   4
   1 -20   8 9593.56 638.039   4
  -1  20   8 9249.88 739.992  12
  -1 -20  -8 9018.60 717.969   1
   1 -20   8 9111.41 706.530   6
   1 -20   8 7372.91 521.150   2
  -1  20   7 8194.58 689.852  12
  -1 -20  -7 7443.19 664.828   1
   1 -20   7 7379.17 517.500   2
   1 -20   7 7629.72 552.320   4
   1 -20   6 4366.01 418.524   4
  -1 -20  -6 4467.05 497.949   1
   1 -20   6 4245.13 386.712   2
  -1  20   6 4391.82 484.303  12
  -1  20   5 1286.85 270.189  12
  -1 -20  -5 1182.93 273.873   1
  -1 -20  -4 811.765 231.669   1
  -1  20   4 978.277 192.292  11
  -1  20   3 1346.67 211.401  11
  -1 -20  -3 1476.23 290.718   1
  -1 -20  -2 2856.88 364.034   1
  -1  20   2 3257.77 328.305  11
  -1 -20  -1 7258.90 586.738   1
  -1 -20   0 3626.85 415.706   1
  -1 -20   1 7398.07 570.637   1
   1 -20  -1 7498.38 623.682   1
  -1 -20   2 2288.81 320.844   1
   1 -20  -2 2729.43 374.949   1
   1  20   2 3099.80 311.394  11
   1  20   3 1421.65 219.648  11
   1 -20  -3 1309.65 269.200   1
   1 -20  -4 775.983 247.550   1
   1  20   4 837.943 177.442  11
   1 -20  -5 1155.69 276.174   1
   1  20   5 1204.76 245.075  12
   1  20   6 4009.48 455.902  12
   1 -20  -6 4219.79 494.783   1
  -1 -20   6 3686.94 358.439   4
   1 -20  -7 8114.37 688.143   1
  -1 -20   7 7108.04 505.191   4
   1  20   7 7305.58 605.586  12
  -1 -20   7 7757.99 513.861   2
  -1 -20   8 8654.52 569.443   4
   1  20   8 8706.12 677.777  12
   1  20   9 1525.27 295.856   7
  -1 -20   9 1418.77 336.434   6
   1  20   9 1782.24 390.265  13
  -1 -20  10 627.719 213.985   6
   1  20  10 825.043 297.199  13
   1  20  11 89.6302 111.108   5
  -1 -20  11 29.1880 125.576   6
   1  20  11 143.677 189.721  13
  -1 -20  12 365.541 183.537   6
  -1 -20  12 308.388 142.954   3
   1  20  12 574.475 258.974  13
  -1 -20  13-11.1317 114.088   6
  -1 -20  13 51.4753 92.7133   3
   1  20  13 145.302 151.679  13
   1  20  14 65.1272 130.589  13
  -1 -20  14 245.737 104.194   3
  -1 -20  15 250.787 119.134   6
   1 -21  15 80.2325 78.1017   3
   1 -21  14 111.568 86.7315   3
   1 -21  13 110.106 121.246   3
  -1  21  13 158.909 125.173  13
   1 -21  13 99.1866 136.900   6
  -1  21  12 423.189 164.714   5
  -1  21  12 964.315 289.830  13
   1 -21  12 484.196 212.217   6
   1 -21  12 371.877 166.818   3
  -1  21  11 284.852 176.419  13
  -1  21  11-5.20773 87.7144   5
   1 -21  11 223.574 171.564   6
  -1  21  10 321.288 173.069   5
  -1  21  10 90.7426 161.929  13
   1 -21  10 134.581 176.007   6
   1 -21   9 504.827 225.642   6
  -1  21   9 645.543 242.632   5
   1 -21   9 349.385 154.948   4
  -1  21   9 628.864 247.111  13
   1 -21   8 9845.30 602.182   2
  -1  21   8 11412.6 841.622  12
   1 -21   8 11385.2 808.612   6
   1 -21   8 11082.0 684.696   4
  -1 -21  -8 11039.8 808.450   1
   1 -21   7 13051.8 733.792   4
  -1 -21  -7 13305.8 902.348   1
  -1  21   7 12717.6 867.848  12
   1 -21   7 11906.4 663.273   2
  -1  21   6 4527.48 511.251  12
   1 -21   6 4039.25 404.379   2
  -1 -21  -6 4101.32 501.976   1
   1 -21   6 4204.05 426.241   4
  -1  21   5 1388.68 278.759  12
  -1 -21  -5 1199.97 272.001   1
   1 -21   5 1079.32 209.531   2
  -1 -21  -4 4076.22 489.946   1
  -1  21   4 4855.05 420.493  11
  -1  21   3 2479.02 294.817  11
  -1 -21  -3 2763.50 401.218   1
  -1 -21  -2 13596.4 831.469   1
  -1  21   2 13720.3 660.462  11
  -1 -21  -1 4473.18 472.526   1
  -1 -21   0 613.001 190.546   1
  -1 -21   1 4661.39 472.573   1
   1 -21  -1 4465.70 508.425   1
  -1 -21   2 12824.6 768.545   1
   1 -21  -2 12851.9 841.111   1
   1  21   2 13599.9 665.217  11
   1 -21  -3 2049.77 356.535   1
   1  21   3 1957.61 272.156  11
   1 -21  -4 4521.22 514.550   1
   1  21   4 4559.20 419.320  11
   1  21   5 901.686 219.965  12
   1 -21  -5 1005.65 263.393   1
  -1 -21   6 3839.64 368.219   2
   1 -21  -6 4354.12 521.196   1
   1  21   6 3719.00 444.694  12
  -1 -21   6 3819.29 375.057   4
   1 -21  -7 13108.0 895.665   1
  -1 -21   7 12209.6 671.191   4
  -1 -21   7 11893.8 644.729   2
   1  21   7 12075.0 794.248  12
  -1 -21   8 10443.2 601.367   2
  -1 -21   8 10788.2 641.522   4
   1  21   9 1146.59 338.366  13
  -1 -21   9 772.936 251.185   6
   1  21  10 423.908 222.033  13
   1  21  10 106.992 115.976   5
  -1 -21  10 190.895 165.895   6
   1  21  11 135.190 114.518   5
  -1 -21  11-48.4293 158.835   6
   1  21  11-20.4770 144.244  13
  -1 -21  12 575.484 208.227   6
  -1 -21  12 201.486 131.135   3
   1  21  12 606.120 232.606  13
  -1 -21  13-5.48663 130.446   6
  -1 -21  13 98.5704 94.0578   3
   1  21  13-174.672 167.446  13
  -1 -21  14 24.8150 122.066   6
  -1 -21  14 173.262 99.3708   3
   1  21  14 93.5514 126.062  13
   1 -22  15 211.126 82.1691   3
   1 -22  14 280.945 120.350   3
  -1  22  13 156.545 160.589  13
   1 -22  13 5.63583 95.8861   3
   1 -22  12 460.951 209.519   6
   1 -22  12 554.325 183.803   3
  -1  22  12 418.399 156.350   5
  -1  22  12 953.413 274.651  13
   1 -22  11 134.830 169.724   6
  -1  22  11 233.453 123.087   5
  -1  22  11 30.0799 149.839  13
  -1  22  10 29.9045 100.272   5
  -1  22  10-144.073 172.764  13
   1 -22  10 143.858 177.372   6
   1 -22   9 1023.98 292.205   6
  -1  22   9 1118.95 284.633   5
   1 -22   9 806.080 203.834   4
  -1  22   9 757.416 257.860  13
   1 -22   8 3903.90 417.312   4
   1 -22   8 3375.18 367.894   2
  -1  22   8 4136.65 534.774   5
  -1  22   8 3895.49 504.435  12
  -1 -22  -8 3379.72 476.859   1
   1 -22   7 7681.88 569.662   4
  -1 -22  -7 7198.27 688.204   1
   1 -22   7 6736.90 513.613   2
  -1  22   7 6787.36 645.965  12
   1 -22   6 4403.46 412.901   2
  -1 -22  -6 4595.06 543.691   1
  -1  22   6 4654.69 519.225  12
   1 -22   6 4648.50 455.338   4
  -1 -22  -5 2107.71 366.054   1
   1 -22   5 1824.02 257.571   2
  -1  22   5 1537.25 306.045  12
  -1 -22  -4 564.044 213.639   1
  -1  22   4 694.162 177.835  11
   1 -22   4 739.856 172.233   2
  -1 -22  -3 5666.73 583.573   1
  -1  22   3 5943.14 464.049  11
  -1  22   2 3230.10 360.829  11
  -1 -22  -2 2549.37 379.462   1
  -1 -22  -1 5667.57 548.837   1
  -1 -22   0 184.055 135.638   1
  -1 -22   1 5395.46 528.813   1
   1  22   2 2535.21 311.270  11
   1 -22  -2 2419.89 380.700   1
  -1 -22   2 2339.41 347.931   1
   1 -22  -3 5158.06 558.888   1
   1  22   3 5608.48 457.257  11
   1 -22  -4 726.339 247.765   1
   1  22   4 421.102 130.242  11
   1 -22  -5 1683.55 333.719   1
  -1 -22   5 1740.99 240.795   2
  -1 -22   5 1613.69 260.515   4
   1  22   5 1608.33 293.305  12
  -1 -22   6 4189.28 397.422   4
   1 -22  -6 3781.60 498.694   1
  -1 -22   6 3676.50 356.052   2
   1  22   6 4289.19 472.188  12
   1  22   7 5734.94 556.549  12
  -1 -22   7 6641.35 490.946   2
  -1 -22   7 6481.61 499.428   4
  -1 -22   8 3434.11 357.376   2
  -1 -22   8 3648.59 382.764   4
   1  22   9 957.239 313.020  13
   1  22  10-92.9913 150.794  13
   1  22  10 54.9794 88.6174   5
  -1 -22  10 290.007 170.717   6
   1  22  11 96.9638 94.8995   5
   1  22  11 331.612 223.644  13
  -1 -22  11 69.0829 137.787   6
   1  22  12 818.022 253.316  13
  -1 -22  12 269.286 129.987   3
  -1 -22  12 630.918 213.106   6
  -1 -22  13 161.994 131.760   6
  -1 -22  13 77.1930 85.2513   3
   1  22  13 95.9166 138.258  13
  -1 -22  14-81.8190 93.9763   6
  -1 -22  14 138.707 95.6029   3
   1  22  14 28.0514 113.081  13
   1 -23  15 111.304 67.9946   3
   1 -23  14-80.9255 91.0278   3
   1 -23  13 512.032 166.192   3
  -1  23  13 491.665 178.732  13
  -1  23  12 31.3888 102.832   5
  -1  23  12 242.051 188.036  13
   1 -23  12 229.017 105.397   3
  -1  23  11 899.098 244.883   5
  -1  23  11 756.238 266.639  13
   1 -23  11 1063.95 257.343   6
  -1  23  10 392.392 198.253   5
  -1  23  10 57.7034 141.816  13
   1 -23  10 180.103 195.518   6
   1 -23   9 527.693 180.190   4
   1 -23   9 942.252 254.028   6
  -1  23   9 892.967 265.121  13
  -1  23   9 851.238 265.969   5
   1 -23   8 919.795 215.194   4
  -1  23   8 1182.83 288.038   5
   1 -23   8 917.564 216.062   2
   1 -23   7 1173.15 234.587   4
  -1  23   7 805.233 200.415  12
  -1 -23  -7 1060.94 322.278   1
   1 -23   7 1102.38 227.828   2
   1 -23   6 411.078 166.898   2
  -1 -23  -6 325.762 205.527   1
  -1  23   6 12.2583 122.697  12
   1 -23   6 142.556 114.416   4
   1 -23   5 1535.27 254.247   2
  -1 -23  -5 2008.12 353.436   1
  -1  23   5 1698.59 322.219  12
  -1 -23  -4 938.004 283.081   1
   1 -23   4 1040.41 200.743   2
  -1  23   4 950.786 211.824  11
  -1  23   4 1381.89 284.138  12
  -1  23   3 8423.61 569.439  11
   1 -23   3 7317.64 514.058   2
  -1 -23  -3 8299.33 708.918   1
  -1 -23  -2 1708.22 320.392   1
  -1  23   2 2160.87 292.793  11
  -1 -23  -1 785.228 209.071   1
  -1 -23   0 1029.34 230.533   1
  -1 -23   1 709.168 220.068   1
  -1 -23   2 1814.97 322.119   1
   1  23   2 2097.51 298.005  11
   1 -23  -3 7156.98 676.943   1
   1  23   3 7919.13 553.075  11
  -1 -23   3 7514.20 490.298   2
   1 -23  -4 604.663 259.661   1
   1  23   4 953.952 237.011  12
  -1 -23   4 738.007 177.370   2
   1  23   4 1059.55 221.446  11
  -1 -23   5 1448.87 232.005   2
  -1 -23   5 1700.58 263.882   4
   1  23   5 1473.92 283.555  12
   1 -23  -5 2023.59 378.392   1
  -1 -23   6 193.094 104.032   4
   1  23   6 322.741 163.285  12
   1 -23  -6 154.092 149.261   1
  -1 -23   6 297.963 100.227   2
  -1 -23   7 1163.28 216.829   2
  -1 -23   7 677.102 184.079   4
  -1 -23   8 1341.89 251.007   4
  -1 -23   8 1193.38 220.664   2
   1  23   9 804.462 302.224  13
   1  23  10 356.254 226.863  13
   1  23  10 579.382 229.102   5
  -1 -23  11 719.289 238.511   6
   1  23  11 846.889 234.665   5
   1  23  11 1464.69 373.544  13
  -1 -23  12 16.7339 83.4245   3
  -1 -23  12 246.984 162.678   6
   1  23  12 391.005 181.062  13
  -1 -23  13 374.617 158.506   6
   1  23  13 582.336 208.102  13
  -1 -23  13 336.242 127.820   3
   1  23  14 88.8185 117.659  13
  -1 -23  14 98.1777 81.8172   3
   1 -24  14 68.8587 67.9107   3
  -1  24  13 357.501 156.625  13
   1 -24  13 218.589 115.136   3
  -1  24  12 247.220 155.134  13
  -1  24  12 445.118 160.414   5
   1 -24  12-112.164 118.692   3
  -1  24  11 158.761 146.917   5
  -1  24  11 518.441 221.189  13
  -1  24  10 525.918 213.286   5
  -1  24  10 529.413 212.265  13
  -1  24   9 434.947 202.447   5
  -1  24   9 376.618 208.889  13
   1 -24   9 366.280 154.644   4
  -1  24   8 1760.31 368.638  13
   1 -24   8 1520.84 270.305   4
  -1  24   8 1686.46 366.946   5
   1 -24   8 1642.81 261.363   2
   1 -24   7 1319.61 240.585   4
  -1 -24  -7 1986.90 419.719   1
  -1  24   7 1751.19 347.309  12
   1 -24   7 1341.88 235.284   2
  -1  24   6 293.519 159.779  12
   1 -24   6 374.389 141.807   2
   1 -24   6 356.235 166.229   4
  -1 -24  -6 227.800 141.844   1
   1 -24   5 927.492 197.601   2
  -1  24   5 641.206 226.019  12
  -1 -24  -5 643.080 251.631   1
  -1  24   4 2788.92 411.823  12
  -1  24   4 3228.82 394.524  11
  -1 -24  -4 3206.41 474.411   1
   1 -24   4 2709.03 333.719   2
   1 -24   3 253.692 159.114   2
  -1  24   3 124.206 139.091  11
  -1 -24  -3 216.178 189.380   1
  -1  24   2 4190.86 413.806  11
   1 -24   2 3779.98 375.701   2
  -1 -24  -2 4239.24 520.156   1
   1 -24   1 281.042 122.866   2
  -1  24   1 751.208 199.701  11
  -1 -24  -1 365.408 183.003   1
  -1 -24   0 3580.49 470.428   1
  -1 -24   1 917.841 287.784   1
   1  24   1 814.636 209.240  11
  -1 -24   1 664.787 153.269   2
  -1 -24   2 3611.35 355.714   2
   1  24   2 4199.71 416.258  11
  -1 -24   3 107.567 95.0998   2
   1  24   3 120.561 116.725  11
   1  24   4 2932.53 365.495  11
   1  24   4 2673.90 376.520  12
  -1 -24   4 2541.25 316.711   2
  -1 -24   5 534.002 148.591   4
   1  24   5 273.256 147.984  12
  -1 -24   5 691.701 169.653   2
  -1 -24   6 608.570 170.273   2
   1  24   6 767.493 222.277  12
  -1 -24   6 319.757 107.398   4
  -1 -24   7 1273.82 236.031   4
  -1 -24   7 1639.35 262.928   2
  -1 -24   8 1886.25 268.507   2
  -1 -24   8 1665.81 257.270   4
   1  24   9 328.001 178.259  13
  -1 -24   9 124.461 85.4156   2
   1  24  10 746.828 260.302   5
   1  24  10 292.905 200.743  13
   1  24  11 352.385 153.742   5
   1  24  11 485.029 205.824  13
  -1 -24  12 290.036 124.361   3
  -1 -24  12 282.754 179.996   6
   1  24  12 563.865 223.086  13
  -1 -24  13 163.447 86.8372   3
   1  24  13 441.457 185.194  13
   1  24  14 106.328 122.068  13
  -1 -24  14 103.749 65.2267   3
   1 -25  14 30.4799 70.8905   3
   1 -25  13 158.242 88.1085   3
  -1  25  13 130.690 99.5867  13
  -1  25  12 29.4490 73.7462   5
  -1  25  12-54.8270 98.1535  13
   1 -25  12-6.14866 85.0088   3
  -1  25  11 1.10203 82.9811   5
  -1  25  11 142.018 126.996  13
  -1  25  10 228.816 134.205  13
  -1  25  10 85.4372 133.079   5
  -1  25   9 384.063 193.697   5
  -1  25   9 484.156 212.731  13
   1 -25   9 514.732 185.952   4
   1 -25   8 1064.42 228.943   4
  -1  25   8 625.832 232.111  13
  -1  25   8 983.827 288.387   5
   1 -25   8 764.959 177.384   2
   1 -25   7-110.850 128.651   2
   1 -25   7 3.50446 119.987   4
   1 -25   6 1452.49 282.465   4
  -1  25   6 879.718 277.752  12
  -1 -25  -6 1209.03 339.259   1
   1 -25   6 1087.09 225.740   2
  -1 -25  -5 9469.89 844.868   1
   1 -25   5 8243.91 583.152   2
  -1  25   5 8080.00 711.902  12
  -1  25   4 4111.29 440.592  11
  -1  25   4 3823.10 497.513  12
   1 -25   4 3509.80 387.537   2
  -1 -25  -4 4429.45 574.909   1
  -1  25   3 6634.09 539.886  11
  -1 -25  -3 6267.54 657.746   1
  -1 -25  -3 5326.94 412.744   2
   1 -25   3 5835.29 483.685   2
  -1 -25  -2 2159.19 282.554   2
  -1  25   2 2491.28 331.323  11
   1 -25   2 2469.08 316.449   2
  -1 -25  -2 1972.79 375.122   1
  -1 -25  -1 185.325 99.0145   2
   1 -25   1 25.1488 122.447   2
  -1  25   1 260.063 155.270  11
  -1 -25  -1 361.121 189.010   1
  -1 -25   0 8066.01 722.033   1
   1 -25   0 6546.02 479.877   2
  -1 -25   0 6985.07 486.517   2
  -1 -25   1 79.5960 101.561   2
   1  25   1 443.814 176.339  11
   1 -25  -1 12.2213 99.2148   2
  -1 -25   1 87.9226 165.728   1
   1 -25  -2 1463.17 241.854   2
  -1 -25   2 1665.92 248.612   2
   1  25   2 2086.58 311.898  11
   1  25   3 6595.82 539.284  11
  -1 -25   3 5677.22 454.263   2
   1  25   4 4180.02 457.897  11
   1  25   4 3561.14 446.602  12
  -1 -25   4 4262.70 398.564   2
  -1 -25   5 8010.44 553.773   2
   1  25   5 7129.24 631.583  12
  -1 -25   5 7727.61 562.043   4
  -1 -25   6 1150.57 235.786   4
  -1 -25   6 1016.74 215.451   2
  -1 -25   7 106.141 93.7468   2
  -1 -25   7-56.6409 120.089   4
  -1 -25   8 903.100 207.160   4
  -1 -25   8 575.422 179.775   2
   1  25   9 588.699 231.880  13
  -1 -25   9 220.531 128.341   2
   1  25  10 239.549 208.838  13
   1  25  10 348.561 185.446   5
   1  25  11 133.638 135.449  13
   1  25  11-38.3935 85.1197   5
  -1 -25  12 70.7116 94.3919   3
   1  25  12-1.64212 111.064  13
   1  25  13 287.712 145.097  13
  -1 -25  13 188.199 102.913   3
  -1 -25  14 99.8971 66.9920   3
   1  25  14 214.634 105.611  13
   1 -26  14 69.2497 65.1726   3
  -1  26  13 941.320 206.924  13
   1 -26  13 517.357 146.310   3
   1 -26  12 156.478 106.982   3
  -1  26  12 230.337 127.249  13
  -1  26  12 426.573 133.896   5
  -1  26  11 508.372 192.492  13
  -1  26  11 470.345 188.660   5
  -1  26  10 315.377 170.254  13
  -1  26  10 238.941 181.188   5
  -1  26   9 547.044 201.402   5
  -1  26   9 429.390 208.135  13
   1 -26   9 318.302 158.092   4
  -1  26   8 855.910 272.426   5
  -1  26   8 762.614 260.695  13
   1 -26   8 784.632 183.314   2
   1 -26   8 720.866 213.184   4
   1 -26   7 462.283 160.355   4
   1 -26   7 138.559 130.792   2
   1 -26   6 5070.10 463.549   2
   1 -26   6 5313.17 496.149   4
   1 -26   5 8925.42 657.701   4
   1 -26   5 7501.84 574.237   2
  -1  26   5 7651.62 699.673  12
  -1 -26  -5 7866.23 783.332   1
  -1 -26  -4 3578.51 536.760   1
  -1  26   4 3182.62 467.000  12
   1 -26   4 3180.14 372.773   2
  -1  26   4 4218.55 449.735  11
  -1  26   3 3059.69 381.208  11
  -1 -26  -3 2426.62 288.186   2
  -1 -26  -3 2654.85 420.014   1
   1 -26   3 2707.86 341.475   2
  -1 -26  -2 881.501 186.838   2
  -1 -26  -2 715.822 258.301   1
   1 -26   2 865.602 214.005   2
  -1  26   2 1046.38 224.381  11
   1 -26   1 240.837 105.868   2
  -1 -26  -1 294.403 160.343   1
  -1  26   1 211.806 159.586  11
  -1 -26  -1 284.198 122.579   2
   1 -26   0 326.595 144.104   2
  -1 -26   0-0.74419 117.098   2
  -1 -26   0 407.456 221.612   1
   1 -26  -1 318.131 121.336   2
   1  26   1 308.431 159.230  11
  -1 -26   1 228.652 111.073   2
  -1 -26   2 991.267 219.326   2
   1  26   2 852.011 218.303  11
   1 -26  -2 1356.67 232.309   2
   1  26   3 3372.38 415.649  11
  -1 -26   3 2367.89 304.434   2
  -1 -26   4 3814.70 396.599   2
   1  26   4 3871.53 446.917  11
  -1 -26   5 6893.56 540.906   4
   1  26   5 6353.42 609.152  12
  -1 -26   5 7520.82 551.412   2
  -1 -26   6 5414.04 480.075   4
  -1 -26   6 5225.94 458.849   2
  -1 -26   7 75.1523 96.6959   2
  -1 -26   7 295.182 155.932   4
  -1 -26   8 732.144 197.408   2
  -1 -26   8 786.903 194.651   4
  -1 -26   9 204.775 140.150   2
   1  26   9 232.585 188.156  13
   1  26  10 375.344 180.886   5
   1  26  10 321.967 274.110  13
   1  26  11 463.881 200.148  13
   1  26  11 474.086 185.186   5
   1  26  12 195.919 135.892  13
  -1 -26  12 6.75450 68.0140   3
   1  26  12 278.991 117.904   5
   1  26  13 1348.64 249.519  13
  -1 -26  13 452.482 120.908   3
   1 -27  14 144.959 74.1870   3
  -1  27  13-73.1123 73.1950  13
   1 -27  13-25.1477 64.9936   3
  -1  27  12 264.296 121.750   5
  -1  27  12 313.125 161.698  13
   1 -27  12-103.986 102.380   3
  -1  27  11 285.174 150.376  13
  -1  27  11 9.33574 77.1518   5
  -1  27  10 170.158 125.069   5
  -1  27  10 216.934 155.815  13
  -1  27   9 89.3013 146.325   5
  -1  27   9 1.76561 118.496  13
   1 -27   8 366.066 142.081   4
  -1  27   8-54.2374 106.687   5
  -1  27   8 448.537 232.502  13
   1 -27   7 708.618 191.403   2
   1 -27   7 1000.06 237.742   4
  -1  27   7 709.410 261.311   5
   1 -27   6 1223.67 253.109   4
   1 -27   6 1198.80 243.840   2
   1 -27   5 2360.22 339.881   2
   1 -27   5 2476.94 375.881   4
   1 -27   4 3042.51 371.086   2
  -1  27   4 3855.78 450.564  11
  -1 -27  -4 3186.30 519.798   1
  -1  27   4 3150.77 466.644  12
  -1  27   3 437.793 172.169  11
  -1 -27  -3 317.547 185.051   1
  -1 -27  -3 229.346 119.170   2
   1 -27   3 405.416 158.416   2
  -1 -27  -2 627.738 181.234   2
  -1 -27  -2 444.255 208.933   1
   1 -27   2 496.074 180.924   2
  -1  27   2 614.152 183.336  11
   1 -27   1 4287.14 420.139   2
  -1 -27  -1 4954.31 612.895   1
  -1 -27  -1 4552.49 407.223   2
  -1  27   1 5512.53 505.486  11
  -1 -27   0 282.157 143.779   2
   1 -27   0 92.9991 139.025   2
  -1 -27   1 4572.86 431.226   2
   1 -27  -1 4681.05 422.135   2
   1  27   1 5142.59 488.221  11
   1 -27  -2 536.326 164.411   2
  -1 -27   2 370.537 169.301   2
  -1 -27   3 665.187 197.056   2
   1  27   3 600.151 189.610  11
   1  27   4 2661.35 404.094  12
  -1 -27   4 3321.37 376.018   2
  -1 -27   5 2596.77 347.927   4
  -1 -27   5 2366.18 319.783   2
  -1 -27   6 957.605 213.227   4
  -1 -27   6 1328.40 241.609   2
  -1 -27   7 715.137 193.027   2
  -1 -27   7 596.314 177.835   4
  -1 -27   8 353.843 139.299   2
  -1 -27   8 227.690 124.339   4
   1  27   9-31.9912 146.028  13
  -1 -27   9-125.159 106.549   2
   1  27  10 410.863 219.327  13
   1  27  10 538.030 213.189   5
   1  27  11 68.9874 121.037   5
   1  27  11 63.3578 113.138  13
  -1 -27  11 122.991 110.990   3
   1  27  12 325.463 151.373  13
   1  27  12 127.879 80.1399   5
  -1 -27  12 41.6115 84.6881   3
  -1 -27  13 17.3915 53.9215   3
   1  27  13 68.4353 111.002  13
   1 -28  13 107.044 76.8205   3
  -1  28  12 322.014 123.809   5
   1 -28  12 147.171 111.967   3
  -1  28  12 67.9980 111.945  13
  -1  28  11 57.1853 91.7841   5
  -1  28  11 342.150 168.374  13
  -1  28  10-8.14270 109.260  13
  -1  28  10 56.6619 119.240   5
  -1  28   9 509.029 225.250   5
  -1  28   9 325.018 201.846  13
  -1  28   8 63.9858 118.752   5
   1 -28   8 343.036 178.782   4
  -1  28   8 454.143 188.835  13
   1 -28   7 118.849 142.638   4
  -1  28   7 201.611 124.807   5
   1 -28   7 175.965 122.618   2
   1 -28   6 776.790 203.500   4
   1 -28   6 700.890 188.902   2
   1 -28   5 484.103 165.665   2
   1 -28   5 587.381 193.418   4
   1 -28   4 481.428 169.678   2
  -1 -28  -3 582.865 238.323   1
  -1 -28  -3 741.246 182.936   2
   1 -28   3 710.322 197.856   2
  -1  28   3 712.925 198.024  11
  -1 -28  -2 509.429 141.238   2
  -1 -28  -2 560.495 317.853   1
   1 -28   2 763.928 201.642   2
  -1  28   2 509.566 188.831  11
   1 -28   1 24.1089 140.594   2
  -1 -28  -1-118.206 233.281   1
  -1  28   1 312.976 181.926  11
  -1 -28  -1 128.199 130.568   2
  -1 -28   0 332.305 137.139   2
   1  28   0 756.307 224.507  11
   1 -28   0 411.165 152.918   2
  -1  28   0 485.330 173.568  11
   1 -28  -1-67.9853 102.131   2
  -1 -28   1 58.4802 129.291   2
   1  28   1 106.158 130.981  11
  -1 -28   2 115.178 119.803   2
   1 -28  -2 367.814 127.620   2
   1  28   2 545.900 188.843  11
  -1 -28   3 667.056 191.869   2
   1  28   3 683.317 209.088  11
  -1 -28   4 577.055 178.594   2
  -1 -28   5 347.994 159.750   2
  -1 -28   5 297.652 154.637   4
  -1 -28   6 960.700 222.635   2
  -1 -28   6 507.497 159.202   4
  -1 -28   7 270.474 149.859   4
  -1 -28   7 189.675 101.140   2
  -1 -28   8 250.638 107.134   2
  -1 -28   8 117.301 98.7624   4
   1  28   9 434.323 257.130  13
  -1 -28   9 210.501 114.270   2
   1  28   9 118.641 139.841   5
   1  28  10-20.5226 86.7905   5
   1  28  10 41.3226 116.082  13
   1  28  11 174.942 109.983   5
   1  28  11 121.112 120.744  13
  -1 -28  11-13.7279 68.6718   3
   1  28  12 17.9282 63.0183   5
  -1 -28  12 125.264 91.1080   3
   1  28  12 7.08265 98.9970  13
  -1 -28  13-25.0206 51.3101   3
   1  28  13 239.444 115.766  13
   1 -29  13 57.2957 61.6384   3
   1 -29  12-210.998 98.1754   3
  -1  29  12-70.0261 87.0956  13
  -1  29  11 138.356 94.1198   5
  -1  29  11 249.793 132.488  13
  -1  29  10 126.212 126.233  13
  -1  29  10 261.270 150.154   5
  -1  29   9 365.639 172.003  13
  -1  29   9 323.310 169.535   5
   1 -29   8 88.4872 113.819   4
  -1  29   8 21.7802 106.785   5
  -1  29   8 98.4153 115.392  13
   1 -29   7 1392.02 261.087   4
  -1  29   7 1401.19 351.983   5
   1 -29   7 1319.48 245.040   2
   1 -29   6 251.224 126.678   2
   1 -29   6 181.257 148.617   4
  -1  29   6 350.466 163.815   5
   1 -29   5-11.8979 121.649   2
   1 -29   5 30.5546 135.893   4
   1 -29   4 1439.42 269.670   2
   1 -29   3 136.305 142.013   2
  -1 -29  -3-155.080 142.598   2
   1 -29   2 1105.88 239.827   2
  -1 -29  -2 1714.25 264.953   2
   1 -29   1 2316.35 341.609   2
  -1 -29  -1 2076.69 292.453   2
  -1  29   1 2865.27 381.363  11
   1 -29   0 672.562 195.726   2
  -1  29   0 445.358 188.511  11
   1  29   0 459.572 179.465  11
  -1 -29   0 403.196 177.853   2
   1 -29  -1 2167.85 310.718   2
  -1 -29   1 2275.53 314.991   2
   1  29   1 2587.15 371.640  11
   1 -29  -2 1323.46 246.258   2
  -1 -29   2 1551.32 247.748   2
  -1 -29   3 129.635 106.395   2
  -1 -29   4 1784.47 287.770   2
  -1 -29   5 102.854 115.196   2
  -1 -29   5 59.0075 111.873   4
  -1 -29   6 178.370 148.730   4
  -1 -29   6 60.3204 128.908   2
  -1 -29   7 1362.62 237.129   4
  -1 -29   7 1197.77 246.081   2
  -1 -29   8 4.60873 86.6488   2
  -1 -29   8 70.5428 97.0117   4
   1  29   9 311.248 189.976  13
   1  29   9 395.207 228.824   5
   1  29  10 75.5465 90.3869   5
   1  29  10 132.444 131.370  13
   1  29  11 168.461 102.950   5
  -1 -29  11 43.3937 67.7052   3
   1  29  11 132.122 119.890  13
  -1 -29  12-43.0222 60.7830   3
   1  29  12 15.1147 65.6674   5
   1  29  12 4.89767 92.7010  13
   1  29  13-89.9653 87.6651  13
  -1  30  12 105.833 72.3020   5
  -1  30  12 239.799 111.893  13
   1 -30  12 75.0134 71.0500   3
  -1  30  11 73.0954 85.3633   5
  -1  30  11 153.167 107.214  13
  -1  30  10 70.2351 100.705  13
  -1  30  10 63.5370 93.9282   5
  -1  30   9 126.568 142.400   5
  -1  30   9-70.2265 130.951  13
  -1  30   8 95.0355 132.198   5
  -1  30   8 50.6330 107.037  13
   1 -30   8 193.977 131.192   4
   1 -30   7 884.898 225.954   4
  -1  30   7 917.134 260.870   5
   1 -30   7 629.277 181.541   2
   1 -30   6 647.376 182.664   4
   1 -30   6 454.716 148.421   2
  -1  30   6 565.504 227.270   5
   1 -30   5 667.913 165.132   2
   1 -30   5 754.514 228.613   4
   1 -30   4 1013.21 220.875   2
  -1 -30  -3 1148.15 226.388   2
   1 -30   3 1353.25 253.021   2
   1 -30   2 15.6922 129.192   2
  -1 -30  -2 133.342 116.681   2
   1 -30   1 58.5540 109.843   2
  -1 -30  -1 277.473 153.053   2
   1 -30   0 222.877 136.989   2
  -1 -30   0 68.5025 103.743   2
  -1 -30   1-28.0446 121.413   2
   1 -30  -1 200.907 123.180   2
  -1 -30   2 89.9501 115.758   2
   1 -30  -2 306.807 130.545   2
  -1 -30   3 1565.07 269.351   2
  -1 -30   4 1182.41 245.144   2
  -1 -30   4 725.911 214.710   4
  -1 -30   5 716.466 202.811   2
  -1 -30   5 964.828 227.305   4
  -1 -30   6 436.663 164.978   4
  -1 -30   6 696.760 199.426   2
  -1 -30   7 785.452 189.044   4
  -1 -30   7 538.426 171.146   2
  -1 -30   8-49.2124 85.7368   2
  -1 -30   8 284.117 128.382   4
   1  30   9 19.7689 82.8745   5
   1  30   9-163.761 132.327  13
   1  30  10 89.7024 132.835   5
   1  30  10 73.7696 103.054  13
  -1 -30  11-38.9054 67.9966   3
   1  30  11 83.2081 85.9007   5
   1  30  11 131.224 118.923  13
  -1 -30  12 37.1746 63.1495   3
   1  30  12 245.869 112.933  13
   1 -31  12 6.25189 53.4344   3
  -1  31  11 5.63343 64.5695   5
  -1  31  11 47.0513 92.8604  13
   1 -31  11-43.8174 78.4905   3
  -1  31  10-54.6056 89.2077   5
  -1  31  10 164.313 129.748  13
  -1  31   9 161.467 138.370   5
  -1  31   9 175.767 148.873  13
   1 -31   8 62.5814 117.950   4
  -1  31   8-114.192 115.841  13
  -1  31   8 214.274 169.105   5
  -1  31   7 0.44469 100.195   5
   1 -31   7 78.6653 103.439   4
  -1  31   7 74.7259 160.522  13
  -1  31   6 563.923 253.670   5
   1 -31   6 272.470 147.864   4
   1 -31   6 210.556 147.032   2
   1 -31   5 791.272 226.007   4
  -1  31   5 765.548 249.193   5
   1 -31   5 806.272 216.255   2
   1 -31   4 1908.15 316.214   2
  -1 -31  -3 547.962 168.313   2
   1 -31   3 567.688 186.732   2
   1 -31   2 1936.60 304.463   2
  -1 -31  -2 2143.12 293.406   2
   1 -31   1 1233.83 248.609   2
  -1 -31  -1 1073.41 208.246   2
   1 -31   0-119.612 128.897   2
  -1 -31   0-138.498 133.826   2
  -1 -31   1 796.409 198.077   2
   1 -31  -1 798.591 205.454   2
   1 -31  -2 1860.92 272.631   2
  -1 -31   2 2459.38 328.725   2
  -1 -31   3 636.476 187.519   2
  -1 -31   4 1591.79 279.715   2
  -1 -31   4 1479.39 272.212   4
  -1 -31   5 643.973 180.283   2
  -1 -31   5 787.887 195.724   4
  -1 -31   6 401.560 149.498   4
  -1 -31   6 375.153 169.086   2
  -1 -31   7 85.5594 123.176   2
  -1 -31   7 62.9070 108.547   4
  -1 -31   8 85.8842 76.9805   2
   1  31   8 37.4076 109.760  13
   1  31   8 4.58953 109.582   5
   1  31   9 182.430 158.535  13
   1  31   9 171.395 128.250   5
   1  31  10 117.339 108.038   5
   1  31  10-33.8371 113.890  13
   1  31  11 11.4400 69.8762   5
  -1 -31  11-94.2894 70.7524   3
   1  31  11 105.880 94.6757  13
   1  31  12-92.2478 89.5625  13
   1 -32  12 142.480 66.8311   3
  -1  32  11-50.2738 112.389  13
  -1  32  11 64.1439 75.1616   5
   1 -32  11-27.0020 65.5961   3
  -1  32  10 282.035 141.929  13
  -1  32  10-12.7370 71.9699   5
  -1  32   9 559.314 187.522  13
  -1  32   9 317.399 150.095   5
  -1  32   8 74.3059 108.326   5
  -1  32   8 327.365 166.413  13
   1 -32   8 212.131 127.869   4
  -1  32   7 141.932 141.079   5
   1 -32   7-178.681 134.943   4
  -1  32   7-109.766 133.410  13
   1 -32   6 635.757 178.951   4
  -1  32   6 432.151 201.455   5
   1 -32   6 304.737 145.180   2
   1 -32   5-28.6764 116.460   4
   1 -32   5 58.8436 129.186   2
  -1  32   5 40.4983 108.030   5
   1 -32   4 425.368 168.435   4
   1 -32   4 433.737 162.064   2
  -1  32   4 678.636 243.423   5
  -1 -32  -3 316.678 119.990   2
   1 -32   3 509.359 186.026   2
  -1 -32  -2 126.054 114.013   2
   1 -32   2 300.190 155.503   2
  -1 -32  -1 1980.23 297.346   2
   1 -32   1 1256.21 244.991   2
   1 -32   0-105.042 112.460   2
  -1 -32   0-80.3536 152.759   2
  -1 -32   1 1566.89 281.509   2
   1 -32  -1 1738.42 283.711   2
   1 -32  -2-181.536 129.386   2
  -1 -32   2 140.639 115.382   2
  -1 -32   3 517.304 180.897   2
  -1 -32   4 307.563 153.628   2
  -1 -32   4 372.642 157.315   4
  -1 -32   5 17.3024 110.524   2
  -1 -32   5 180.166 94.9047   4
  -1 -32   6 564.680 172.604   4
  -1 -32   6 430.768 142.072   2
  -1 -32   7-20.3342 83.7789   4
  -1 -32   7-106.157 97.5727   2
  -1 -32   8 91.7105 91.7842   2
   1  32   8 81.5575 115.296   5
   1  32   8 306.391 182.768  13
   1  32   9 461.774 169.610   5
   1  32   9 522.896 195.673  13
   1  32  10-8.89931 70.6027   5
   1  32  10 176.762 145.238  13
   1  32  11-70.6292 77.4326   5
  -1 -32  11-114.959 70.7458   3
   1  32  11 105.909 94.4187  13
  -1  33  11 3.93275 62.7572   5
   1 -33  11 5.55568 56.3368   3
  -1  33  10 206.368 115.982   5
  -1  33  10 616.636 159.246  13
  -1  33   9-85.3902 108.247  13
  -1  33   9 93.6648 101.192   5
  -1  33   8-45.2073 90.6374   5
  -1  33   8 165.300 149.653  13
  -1  33   7 53.4737 100.484   5
   1 -33   7-71.1888 110.521   4
  -1  33   7-191.077 133.236  13
  -1  33   6 42.0905 142.194   5
   1 -33   6 10.8912 100.388   4
  -1  33   5 15.8564 129.199   5
   1 -33   5 232.259 124.842   4
   1 -33   5 106.776 104.487   2
  -1  33   4 54.5929 123.954   5
   1 -33   4-107.919 135.867   4
   1 -33   4-113.210 134.365   2
  -1  33   3 499.073 181.097   5
  -1 -33  -3 190.845 100.510   2
   1 -33   3 237.170 138.024   2
  -1  33   2 408.790 169.615   5
  -1 -33  -2 330.385 167.580   2
   1 -33   2 492.247 169.098   2
  -1  33   1 68.3693 114.002   5
   1 -33   1 135.090 121.768   2
  -1 -33  -1-73.6324 127.056   2
  -1 -33   0-106.950 133.718   2
   1 -33   0-92.2765 131.696   2
  -1 -33   1 156.250 122.346   2
   1 -33  -1-53.8425 118.880   2
   1 -33  -2 490.862 165.363   2
  -1 -33   2 531.202 199.519   2
  -1 -33   3 136.997 136.147   2
  -1 -33   4-52.6623 88.0715   4
  -1 -33   4 117.512 111.540   2
  -1 -33   5 99.1935 111.337   2
  -1 -33   5-7.38773 105.439   4
  -1 -33   6 141.736 137.536   2
  -1 -33   6 188.956 99.9584   4
  -1 -33   7-39.2666 88.5935   4
   1  33   7 108.754 132.899   5
  -1 -33   7 141.183 113.597   2
   1  33   8 289.865 160.493   5
   1  33   8-32.5185 115.085  13
   1  33   9 248.839 131.520   5
   1  33   9-33.5992 109.274  13
   1  33  10 267.312 114.662   5
  -1 -33  10 209.166 85.1578   3
   1  33  11 112.171 88.0063  13
  -1  34  10 966.178 174.953   5
  -1  34   9-53.4824 90.7630   5
  -1  34   9-31.5432 92.8854  13
  -1  34   8 360.818 136.343   5
  -1  34   8-152.000 110.902  13
  -1  34   7 101.444 126.472   5
  -1  34   7 98.4777 110.808  13
   1 -34   7 169.922 162.769   4
  -1  34   6 27.4778 85.7501   5
  -1  34   6 107.873 135.450  13
   1 -34   6-49.1713 112.250   4
  -1  34   5 277.120 180.030   5
   1 -34   5 239.768 128.113   2
   1 -34   5 165.764 121.616   4
  -1  34   4 32.0741 109.921   5
   1 -34   4 394.040 177.491   4
   1 -34   4 89.0677 111.592   2
  -1  34   3 903.825 257.826   5
   1 -34   3 1142.75 237.929   2
  -1 -34  -3 873.329 179.848   2
   1 -34   2 146.823 123.146   2
  -1  34   2 142.797 140.617   5
  -1 -34  -2 143.899 99.6338   2
  -1 -34  -1 198.969 101.916   2
  -1  34   1 214.570 90.6117   5
   1 -34   1 89.8707 106.046   2
  -1 -34   0 314.268 159.646   2
   1 -34   0 148.594 91.8523   2
   1 -34  -1 212.659 111.687   2
  -1 -34   1 109.147 105.080   2
   1 -34  -2 140.354 115.453   2
  -1 -34   2 109.665 108.808   2
  -1 -34   3 1065.39 223.294   2
  -1 -34   3 748.535 214.560   4
  -1 -34   4 168.256 121.320   2
  -1 -34   4 450.815 133.329   4
  -1 -34   5 247.115 121.263   4
  -1 -34   5 218.941 145.961   2
  -1 -34   6-136.129 117.785   4
  -1 -34   6-10.5872 91.5937   2
   1  34   7 100.383 118.156   5
  -1 -34   7 85.2039 90.5302   4
  -1 -34   7 3.28309 72.7217   2
   1  34   8-44.5051 90.9827   5
   1  34   8-11.8160 103.934  13
   1  34   9-48.1708 104.679   5
   1  34   9 122.176 117.390  13
   1  34  10 701.758 153.125   5
   1  34  10 1164.03 214.842  13
  -1  35  10 328.165 103.164   5
   1 -35  10 81.9785 56.2512   3
  -1  35   9 320.435 120.778   5
  -1  35   8 1176.65 216.370  13
  -1  35   8 561.815 157.472   5
  -1  35   7 169.903 122.358   5
  -1  35   7 205.681 124.564  13
   1 -35   7-32.7529 85.9573   4
  -1  35   6-28.6041 83.5089   5
   1 -35   6 29.8017 86.9582   4
  -1  35   6-200.832 138.219  13
  -1  35   5 84.6994 132.228   5
   1 -35   5 264.558 138.342   4
   1 -35   4 659.243 164.985   2
  -1  35   4 677.145 232.335   5
   1 -35   4 1024.62 240.264   4
   1 -35   3 33.9876 131.329   4
  -1  35   3-10.8645 83.9104   5
   1 -35   3 144.961 100.327   2
  -1  35   2 155.740 108.161   5
  -1 -35  -2 258.872 136.838   2
   1 -35   2 114.707 114.770   2
  -1 -35  -1 11.5391 120.721   2
  -1  35   1 73.8524 94.9802   5
   1 -35   1 219.772 139.080   2
   1 -35   0 503.205 146.993   2
  -1 -35   0 356.871 158.852   2
  -1 -35   1-142.063 127.783   2
   1 -35  -1 261.360 114.066   2
   1 -35  -2 27.4809 84.9968   2
  -1 -35   2 39.7478 106.008   2
  -1 -35   3-50.8773 124.583   2
  -1 -35   3-131.266 124.474   4
  -1 -35   4 634.055 186.702   4
  -1 -35   4 934.362 203.970   2
  -1 -35   5 392.954 132.213   4
  -1 -35   5 551.891 163.770   2
   1  35   6 99.4912 93.6260   5
  -1 -35   6 244.212 117.989   2
  -1 -35   6-90.7277 97.0671   4
   1  35   7 108.422 130.137  13
   1  35   7 301.439 147.822   5
   1  35   8 923.082 236.937  13
   1  35   8 1072.57 230.276   5
   1  35   9 187.203 99.8087   5
   1  35   9 593.476 166.845  13
   1  35  10 94.5281 55.8728   5
  -1  36   9 120.378 80.4226   5
  -1  36   8 293.524 113.558   5
  -1  36   7 169.645 103.197   5
  -1  36   6 65.2536 106.257   5
   1 -36   6-35.4002 83.4393   4
   1 -36   5 270.768 130.802   4
  -1  36   5 163.062 127.791   5
  -1  36   4-23.6495 78.7859   5
   1 -36   4 67.8472 100.357   4
  -1  36   3 164.699 118.009   5
   1 -36   3 6.84967 95.5660   2
   1 -36   3 106.389 122.575   4
  -1 -36  -2 437.288 161.553   2
  -1  36   2 389.536 175.054   5
   1 -36   2 722.634 190.078   2
  -1  36   1 294.373 135.544   5
   1 -36   1 155.009 103.523   2
  -1 -36  -1 76.1157 104.789   2
  -1 -36   0 215.722 127.080   2
   1 -36   0 79.2410 89.4891   2
  -1 -36   1 148.661 113.170   2
   1 -36  -1 87.0200 114.530   2
  -1 -36   2 631.239 165.735   2
  -1 -36   2 488.356 163.186   4
  -1 -36   3 145.586 96.8169   2
  -1 -36   3 160.603 122.081   4
  -1 -36   4 124.299 88.2190   4
  -1 -36   4 22.1802 103.435   2
   1  36   5 491.535 203.507   5
  -1 -36   5 198.173 103.638   4
  -1 -36   5 583.039 153.164   2
   1  36   6 64.1037 82.3442   5
  -1 -36   6 304.056 111.564   4
  -1 -36   6 234.848 110.946   2
   1  36   7-63.8282 84.8277   5
   1  36   7-83.5023 130.936  13
   1  36   8 383.816 142.102   5
   1  36   8 480.723 163.525  13
   1  36   9-94.4093 76.8991   5
   1  36   9 190.330 118.246  13
  -1  37   8 96.6778 69.6139   5
  -1  37   7 82.4543 77.9949   5
  -1  37   6-18.6895 65.6720   5
   1 -37   6 42.2749 100.113   4
   1 -37   5 239.855 119.557   4
  -1  37   5 179.958 117.260   5
   1 -37   4 29.0308 92.1564   4
  -1  37   4 29.5788 96.6356   5
  -1  37   3 18.9557 81.1701   5
   1 -37   3-12.8708 102.327   4
  -1  37   2 78.1998 110.942   5
   1 -37   2 239.694 145.940   4
  -1 -37  -2-4.60716 86.4186   2
   1 -37   2 175.289 86.5883   2
   1 -37   1 114.337 105.070   2
  -1 -37  -1-3.17996 98.5412   2
  -1 -37   0 147.400 124.696   2
   1 -37   0-53.8437 87.9061   2
   1 -37  -1-95.2754 78.3163   2
  -1 -37   1-89.9472 96.6206   2
  -1 -37   2 196.690 102.998   4
  -1 -37   2 188.032 100.987   2
  -1 -37   3 166.803 103.976   2
   1  37   3 11.9847 82.1736   5
  -1 -37   3-112.221 96.2098   4
  -1 -37   4-60.1695 70.9386   4
   1  37   4 40.7223 78.4936   5
  -1 -37   5-98.9645 89.3928   4
  -1 -37   5-14.2051 77.8249   2
   1  37   6 162.720 110.688   5
   1  37   6-234.903 145.541  13
   1  37   7 202.736 116.094   5
   1  37   7 301.052 119.966  13
   1  37   8 158.963 94.5989   5
   1  37   8-36.5968 85.6905  13
  -1  38   8 119.167 66.5172   5
  -1  38   7 203.969 88.5991   5
   1 -38   6-36.9144 78.0893   4
  -1  38   6 3.02069 67.4593   5
  -1  38   5 58.7966 74.5915   5
   1 -38   5-6.75556 83.0423   4
   1 -38   4 28.6318 90.2972   4
  -1  38   4 14.2074 74.1716   5
  -1  38   3 79.5674 100.868   5
   1 -38   3 234.755 110.364   4
  -1 -38  -2 166.605 93.9778   2
   1 -38   2 326.237 145.100   4
  -1  38   2 292.447 133.461   5
  -1 -38  -1 83.0521 93.4504   2
  -1 -38   0 288.628 99.1845   2
  -1 -38   1-27.8436 93.4571   4
  -1 -38   1 244.074 133.612   2
   1  38   2 199.100 122.586   5
  -1 -38   2 337.628 120.718   4
  -1 -38   2 271.183 116.436   2
  -1 -38   3 206.148 114.024   2
  -1 -38   3 137.830 91.8053   4
   1  38   3 68.3345 94.4319   5
  -1 -38   4 62.4468 91.0486   2
  -1 -38   4 215.335 97.8841   4
   1  38   4 235.081 115.874   5
   1  38   5 53.4515 79.5416   5
  -1 -38   5 101.544 72.7492   2
  -1 -38   5 60.6853 75.7483   4
   1  38   6 108.607 90.7499  13
   1  38   6 58.4880 66.9162   5
   1  38   7 78.8955 70.5025   5
   1  38   7 222.082 110.167  13
   1  38   8 154.503 79.5668   5
  -1  39   7 137.568 79.4210   5
  -1  39   6 132.397 78.8198   5
  -1  39   5 107.872 87.1081   5
   1 -39   5 2.62830 67.3148   4
   1 -39   4 25.1374 80.1553   4
  -1  39   4 133.304 84.4801   5
  -1  39   3 29.1954 71.3189   5
   1 -39   3 129.248 101.236   4
   1 -39   2-9.60294 76.7870   4
  -1 -39  -1-107.849 104.001   2
   1 -39   1 8.02353 79.0905   4
  -1 -39   0 274.614 106.710   2
  -1 -39   0 11.4897 74.3452   4
  -1 -39   1 62.1453 77.5952   4
  -1 -39   1 90.9941 93.8300   2
  -1 -39   2 193.617 90.4854   2
   1  39   2 218.787 114.523   5
  -1 -39   2-1.63987 65.3826   4
   1  39   3 116.203 90.0179   5
  -1 -39   3 176.693 96.3039   4
  -1 -39   3 76.9934 79.5949   2
  -1 -39   4 149.767 88.9360   4
   1  39   4 144.814 94.1851   5
  -1 -39   4 273.362 100.382   2
   1  39   5 75.4586 79.3529   5
   1  39   5 191.890 106.456  13
   1  39   6-88.2424 70.2015   5
   1  39   6-14.4437 88.2515  13
   1  39   7 152.005 77.9380   5
  -1  40   5 159.500 85.6291   5
   1 -40   5 47.9332 57.0073   4
   1 -40   4-48.9199 71.3314   4
  -1  40   4-22.6781 63.3570   5
  -1  40   3 396.407 119.563   5
   1 -40   3 183.780 93.8464   4
   1 -40   2 1.15189 80.2222   4
  -1 -40  -1 124.166 78.0189   2
   1 -40   1-29.5109 77.1712   4
  -1 -40  -1-5.10439 75.6327   4
  -1 -40   0-7.58019 61.9034   4
  -1 -40   0-1.86649 72.6994   2
   1 -40   0-111.132 81.1434   4
  -1 -40   1 30.3679 76.7297   2
  -1 -40   1 105.612 71.4160   4
  -1 -40   2-85.8229 87.4756   2
  -1 -40   2-21.0973 62.4797   4
   1  40   2 57.5281 68.8765   5
  -1 -40   3 14.7988 56.4199   4
   1  40   3 170.460 80.7334   5
   1  40   4 130.720 74.0765   5
   1  40   5 58.0666 54.6354   5
   1 -41   3-78.7382 62.9332   4
   1 -41   2 75.1657 70.9803   4
   1 -41   1 88.0642 68.9425   4
   1 -41   0-54.4186 60.1258   4
   1 -41  -1-11.1032 58.7981   4
  -2   0   0 997795. 1857.08  12
  -2   0   0 999999. 2356.51   8
  -2   0   1 3218.18 112.192   8
  -2   0   1 2977.36 86.9426   7
   2   0   1 3095.63 89.5919   7
  -2   0   1 2946.69 140.385  12
  -2   0   2 3270.01 86.3485   8
  -2   0   2 3048.67 124.283   7
   2   0   2 3045.34 126.942   7
  -2   0   3 80784.9 994.925  10
   2   0   3 80837.0 795.243   7
  -2   0   3 80238.2 776.581   7
  -2   0   3 78085.8 1012.07  12
   2   0   4 13194.8 379.724   7
  -2   0   4 13521.4 375.029   7
  -2   0   4 14046.4 468.776  10
   2   0   5 1110.81 120.514   7
  -2   0   5 1197.94 131.131   7
   2   0   6-23.4920 79.2468   7
  -2   0   6-46.8855 89.3326   7
  -2   0   7 413.755 89.9856   7
   2   0   7 255.942 86.3517   7
   2   0   8 1114.97 205.717   7
  -2   0  -8 1020.86 156.085   8
  -2   0   8 1027.80 160.056   7
  -2   0   9 127.585 98.4555   7
  -2   0  -9 191.007 84.9529   8
   2   0   9 77.9315 79.8418   7
  -2   0 -10 178.736 70.5048   8
   2   0  10 267.964 126.833   7
  -2   0  10 330.156 153.271   7
  -2   0  11 1263.06 270.992   6
   2   0  11 2114.55 333.466   3
   2   0  11 1784.15 332.342   6
   2   0  12 1685.34 395.574   6
  -2   0  12 2260.42 390.621   6
  -2   0  13 156.951 160.068   6
   2   0  13 286.675 192.669   6
  -2   0  14 245.919 194.922   6
   2   0  14 241.713 133.349   6
  -2   0  15 9.69196 126.572   6
   2   0  15 372.507 157.454   6
  -2   0  16-118.866 132.149   6
  -2   0  17 138.462 87.3452   6
  -2   1  17 91.0962 98.1483   6
  -2   1  16-157.652 136.208   6
   2  -1  15 224.337 146.982   6
  -2   1  15 128.300 119.522   6
   2  -1  14 202.482 179.377   6
  -2   1  14 323.908 178.830   6
   2  -1  13 521.903 228.226   6
  -2   1  13 405.833 202.352   6
   2  -1  12 3334.41 473.720   6
  -2   1  12 3128.04 453.898   6
   2  -1  12 3099.71 429.650   3
  -2   1  11 852.792 278.796   6
   2  -1  11 1172.18 301.928   6
   2  -1  11 485.757 192.371   3
  -2  -1 -10 973.970 170.470   8
  -2   1  10 875.742 185.326   7
  -2  -1  -9 419.231 117.634   8
  -2   1   9 430.395 121.371   7
   2  -1   9 449.981 134.768   7
   2  -1   8 2318.55 243.479   7
  -2   1   8 2397.68 240.446   7
  -2   1   7 3327.26 263.001   7
   2  -1   7 2748.65 250.345   7
   2  -1   6 5659.04 312.374   7
  -2   1   6 6568.21 339.165   7
  -2   1   5 5558.64 276.537   7
   2  -1   5 5389.58 271.926   7
  -2   1   5 5306.10 340.976  12
   2  -1   4 13360.4 378.499   7
  -2   1   4 13347.1 375.354   7
  -2   1   4 13211.1 479.113  12
  -2   1   4 13904.9 471.247  10
  -2   1   3 24831.6 548.110  10
   2  -1   3 24001.0 436.232   7
  -2   1   3 23758.9 566.262  12
  -2   1   3 23065.0 421.883   7
  -2   1   2 12326.4 362.263  12
  -2   1   2 11686.1 247.648   7
   2  -1   2 12514.4 256.204   7
  -2   1   2 11989.4 194.094   8
  -2   1   1 3026.55 113.706   8
  -2   1   1 3060.25 93.8528   7
  -2   1   1 3017.01 153.785  12
  -2   1   0 38518.6 471.796   8
  -2   1  -1 2894.61 149.877   8
  -2  -1   1 3166.78 112.221   8
   2   1   1 2822.66 89.5803   7
   2   1   2 11275.7 246.374   7
  -2   1  -2 11588.5 316.921   8
  -2  -1   2 12162.6 247.930   7
  -2  -1   2 12044.4 140.670   8
  -2  -1   3 23944.3 544.531  10
  -2  -1   3 23653.0 423.204   7
  -2  -1   4 14139.6 473.503  10
  -2  -1   4 13535.9 378.390   7
   2   1   4 13129.3 378.457   7
  -2  -1   5 5415.57 270.513   7
   2   1   5 6379.25 307.004   7
  -2  -1   6 5892.38 310.109   7
   2   1   6 5812.40 319.949   7
  -2   1  -6 5607.77 307.816   8
  -2   1  -7 3262.24 251.293   8
   2   1   7 2753.72 241.594   7
  -2  -1   7 3207.25 250.155   7
  -2  -1   8 2587.31 251.509   7
   2   1   8 2333.21 250.629   7
  -2   1  -8 2267.35 226.245   8
  -2   1  -9 476.031 112.125   8
  -2  -1   9 333.585 113.112   7
   2   1   9 314.268 100.264   7
   2   1  10 1214.36 217.521   7
   2   1  11 612.341 203.860   3
   2   1  11 502.690 234.694  13
   2   1  11 660.692 263.007   6
  -2  -1  11 1178.32 300.371   6
  -2  -1  12 3620.78 489.569   6
   2   1  12 3471.29 467.801   6
   2   1  13 487.454 203.045   6
  -2  -1  13-97.2124 175.576   6
   2   1  14 844.015 247.979   6
  -2  -1  14 654.723 244.137   6
   2   1  15 294.195 166.811   6
  -2  -1  15 71.6459 176.357   6
  -2  -1  16 119.067 112.568   6
  -2  -1  17 443.937 144.665   6
   2  -2  16 22.3122 119.346   6
  -2   2  16-45.8816 101.347   6
   2  -2  15 638.063 223.326   6
  -2   2  15 239.876 177.720   6
  -2   2  14 871.737 257.460   6
   2  -2  14 688.593 248.671   6
   2  -2  13 588.796 213.931   6
  -2   2  13 205.483 189.123   6
   2  -2  12 3107.44 452.124   6
   2  -2  12 3174.69 432.611   3
  -2   2  12 2725.91 443.466   6
  -2   2  11 1322.05 239.851   7
   2  -2  11 1953.39 336.033   6
   2  -2  11 956.209 261.480   3
  -2   2  11 1847.17 346.792   6
  -2  -2 -10 1612.00 214.082   8
  -2   2  10 1596.57 238.189   7
  -2  -2  -9 495.164 123.316   8
  -2   2   9 615.167 144.974   7
  -2   2   8 3.27896 71.0890   7
   2  -2   8-71.8564 63.1825   7
   2  -2   7 7955.08 398.917   7
  -2   2   7 8001.69 411.589   7
  -2   2   6 1776.38 178.887   7
   2  -2   6 1899.90 179.762   7
  -2   2   5 6397.42 373.504  12
   2  -2   5 5856.48 282.003   7
  -2   2   5 5683.25 283.561   7
  -2   2   4 40171.3 798.039  10
  -2   2   4 39929.3 836.938  12
  -2   2   4 39883.1 659.048   7
   2  -2   4 40205.7 649.396   7
  -2   2   3 22146.3 435.305   7
   2  -2   3 22853.5 423.673   7
  -2   2   3 21440.0 555.889  12
  -2   2   3 21946.4 522.936  10
  -2   2   2 7455.21 299.081  12
  -2   2   2 7547.10 174.571   8
  -2   2   1 105260. 693.958   8
  -2   2   1 105685. 930.483  12
  -2   2   0 192359. 1075.52   8
  -2   2  -1 104707. 875.243   8
  -2  -2   2 6972.14 97.9903   8
  -2   2  -2 7723.12 263.759   8
  -2   2  -3 22023.5 480.800   8
   2   2   3 21890.5 434.080   7
  -2  -2   3 21376.5 404.829   7
  -2  -2   3 22479.7 524.517  10
   2   2   4 38811.9 657.839   7
  -2  -2   4 38699.8 626.020   7
  -2   2  -4 39044.1 694.030   8
   2   2   5 5725.89 285.028   7
  -2  -2   5 5763.78 279.378   7
  -2   2  -5 6009.39 295.725   8
   2   2   6 1796.24 181.647   7
  -2  -2   6 1638.18 162.316   7
  -2   2  -6 1932.27 173.462   8
   2   2   7 8067.94 419.969   7
  -2  -2   7 7772.09 386.233   7
  -2   2  -7 7915.82 395.028   8
  -2   2  -8-58.8252 81.9181   8
   2   2   8 106.633 136.761   7
  -2  -2   8 14.5965 61.1205   7
   2   2   9 453.244 160.575   7
  -2   2  -9 537.666 120.694   8
   2   2  10 1730.65 248.830   7
  -2  -2  11 1338.39 264.875   3
   2   2  11 966.800 299.327   6
  -2  -2  11 1261.74 336.124   6
   2   2  11 1437.90 263.633   7
   2   2  11 973.852 276.509  13
  -2  -2  12 3773.97 513.862   6
   2   2  12 3093.97 423.461   6
   2   2  13 289.821 198.292   6
  -2  -2  13 27.2503 167.173   6
   2   2  14 637.915 209.444   6
  -2  -2  14 708.062 242.851   6
  -2  -2  15 411.810 191.442   6
  -2  -2  16 76.8141 129.412   6
  -2  -2  17 91.6122 116.077   6
   2  -3  16 292.358 148.448   6
  -2   3  16 296.567 119.802   6
   2  -3  15 505.619 220.232   6
  -2   3  15 742.967 230.533   6
   2  -3  14 958.939 280.840   6
  -2   3  14 517.201 210.067   6
   2  -3  13 647.453 222.675   6
  -2   3  13 393.559 209.114   6
   2  -3  12 2475.86 401.494   3
   2  -3  12 3083.10 457.416   6
  -2   3  12 2261.51 382.000   6
  -2   3  11 4048.87 402.150   7
   2  -3  11 4007.47 467.104   3
  -2   3  11 4166.00 472.630   6
   2  -3  11 4929.70 539.304   6
  -2   3  10 725.869 185.982   7
  -2  -3 -10 735.883 161.555   8
   2  -3  10 807.673 217.643   3
  -2   3   9 2290.48 284.616   7
  -2   3   8 287.204 94.9467   7
  -2   3   7 5826.48 356.070   7
  -2   3   6 3521.56 245.066   7
  -2   3   6 3593.84 306.222  12
  -2   3   5 24548.5 598.526   7
  -2   3   5 24515.4 733.741  12
  -2   3   4 16525.2 554.489  12
  -2   3   4 16853.3 442.592   7
  -2   3   4 15901.9 506.998  10
  -2   3   3 15877.4 448.064  10
  -2   3   3 15261.6 493.340  12
  -2   3   2 20486.4 502.929  12
  -2   3   2 20564.0 320.088   8
  -2   3   1 13831.9 249.876  11
  -2   3   1 13332.1 265.700   8
  -2   3   0 415.444 58.4165   8
  -2   3  -1 13375.7 321.754   8
   2   3   1 11959.5 230.191  11
  -2   3  -2 19944.5 422.908   8
   2   3   2 19793.2 294.366  12
  -2   3  -3 15235.5 404.870   8
   2   3   3 16449.0 358.657  12
  -2  -3   3 15926.8 443.160  10
  -2   3  -4 16730.3 461.688   8
   2   3   4 15905.3 437.281   7
  -2  -3   4 15866.7 505.291  10
  -2   3  -5 24705.0 604.866   8
   2   3   5 24263.6 603.185   7
  -2  -3   5 23888.3 559.974   7
   2   3   6 3368.78 248.611   7
  -2  -3   6 3298.86 229.310   7
  -2   3  -6 3516.36 241.042   8
  -2   3  -7 5270.85 314.908   8
   2   3   7 5634.52 359.066   7
   2   3   8 461.629 128.893   7
  -2   3  -8 387.240 84.9100   8
  -2   3  -9 1759.32 203.232   8
   2   3   9 1845.70 248.718   7
   2   3  10 1251.61 237.469   7
   2   3  10 685.920 210.809   3
  -2  -3  10 848.475 238.046   6
   2   3  11 3421.98 521.532  13
  -2  -3  11 5041.32 541.432   6
   2   3  11 4195.73 403.346   7
  -2  -3  11 4529.50 462.337   3
   2   3  12 1441.46 373.556  13
  -2  -3  12 3318.10 513.820   6
  -2  -3  13 172.098 227.756   6
  -2  -3  14 627.792 223.420   6
  -2  -3  15 282.656 170.754   6
  -2  -3  16 26.7113 125.375   6
  -2  -3  17-140.352 114.983   6
   2  -4  16 201.782 144.361   6
   2  -4  15 957.920 261.588   6
  -2   4  15 610.659 211.652   6
  -2   4  14 434.076 191.734   6
   2  -4  14 540.631 246.772   6
  -2   4  13 1402.32 318.342   6
   2  -4  13 1514.89 332.518   6
   2  -4  13 2060.72 371.927   3
  -2   4  12 6923.77 537.671   7
   2  -4  12 7381.23 675.571   6
  -2   4  12 6766.36 630.494   6
   2  -4  12 7065.81 644.246   3
   2  -4  11 6018.42 601.869   6
  -2   4  11 5286.02 455.567   7
   2  -4  11 5398.91 534.560   3
  -2   4  11 5244.24 550.561   6
  -2   4  10 4168.11 503.425  13
  -2   4  10 3115.94 331.106   7
   2  -4  10 4033.63 465.796   6
   2  -4  10 3340.76 403.567   3
  -2  -4 -10 3375.03 323.003   8
  -2   4   9 4930.63 393.631   7
  -2   4   8 1341.69 192.506   7
  -2   4   7 9984.72 465.464   7
  -2   4   7 10444.8 597.816  12
  -2   4   6 2669.24 218.981   7
  -2   4   6 2885.35 280.067  12
  -2   4   5 1109.81 141.081   7
  -2   4   5 885.598 141.925  12
  -2   4   4 30556.2 696.719  10
  -2   4   4 31502.2 785.044  12
  -2   4   3 2323.55 182.608  10
  -2   4   3 2007.20 192.843  12
  -2   4   2 9513.46 356.320  12
  -2   4   2 9326.89 238.766   8
  -2   4   1 3387.20 147.715   8
  -2   4   1 3693.17 147.379  11
  -2   4   0 31544.9 466.634   8
  -2   4  -1 3467.50 169.894   8
   2   4   1 3268.12 137.021  11
  -2   4  -2 9520.30 299.650   8
   2   4   2 9551.77 235.631  12
  -2   4  -3 2125.03 158.367   8
   2   4   3 2186.96 144.752  12
  -2  -4   3 2255.02 181.774  10
  -2   4  -4 30410.5 615.745   8
   2   4   4 32111.7 615.342  12
  -2  -4   4 32041.7 701.829  10
  -2   4  -5 927.881 113.608   8
   2   4   5 1205.41 147.487   7
  -2   4  -6 2812.00 213.654   8
   2   4   6 2990.08 242.035   7
  -2   4  -7 9926.18 430.289   8
   2   4   7 10421.6 492.797   7
   2   4   8 1206.00 189.434   7
  -2   4  -8 1480.09 174.117   8
   2   4   9 5208.66 411.266   7
  -2   4  -9 4972.09 332.670   8
   2   4  10 3263.02 342.383   7
  -2  -4  10 4453.22 494.876   6
   2   4  10 3354.51 495.489  13
  -2  -4  11 5431.56 601.970   6
   2   4  11 6183.11 498.507   7
  -2  -4  11 5819.52 515.467   3
   2   4  11 5980.70 654.487  13
   2   4  12 6686.70 531.152   7
  -2  -4  12 6361.61 636.720   6
  -2  -4  12 7690.57 621.955   3
   2   4  12 6840.02 718.410  13
  -2  -4  13 1396.05 313.798   6
  -2  -4  14 307.442 184.600   6
  -2  -4  15 702.305 243.288   6
  -2  -4  16 95.9773 141.150   6
  -2  -4  17-205.256 119.351   6
   2  -5  16 251.028 149.727   6
   2  -5  15 660.534 235.603   6
   2  -5  14 1871.82 377.954   6
  -2   5  14 1603.66 312.304   6
   2  -5  13 1512.47 327.240   6
   2  -5  13 2119.22 355.112   3
  -2   5  13 1624.04 326.479   6
  -2   5  12 6810.19 532.204   7
   2  -5  12 7595.07 687.503   6
  -2   5  12 6383.71 605.893   6
   2  -5  12 6893.88 626.718   3
  -2   5  11 4020.01 407.540   7
   2  -5  11 4048.13 470.856   3
   2  -5  11 4358.43 507.863   6
  -2   5  11 3920.65 459.667   6
  -2   5  11 4959.47 589.539  13
  -2   5  10 3118.33 337.132   7
   2  -5  10 3156.46 396.475   3
  -2   5  10 3566.24 477.951  13
   2  -5  10 3713.81 446.890   6
  -2   5   9 2377.39 287.532   7
  -2   5   8 145.198 102.964   7
  -2   5   7 27688.3 955.808  12
  -2   5   7 26567.8 760.916   7
  -2   5   6 13423.4 508.827   7
  -2   5   6 13210.3 598.483  12
  -2   5   5 13184.9 560.381  12
  -2   5   5 13313.9 461.729   7
  -2   5   4 3849.91 264.219  10
  -2   5   4 3721.14 284.384  12
  -2   5   3 2408.26 216.928  12
  -2   5   3 2827.48 197.694  10
  -2   5   2 3208.50 153.678   8
  -2   5   2 3054.28 221.081  12
  -2   5   2 3257.20 161.697  11
  -2   5   1 4443.13 176.284   8
  -2   5   0 10314.4 277.775   8
   2   5   1 4130.06 168.880  11
  -2   5  -1 4525.48 199.936   8
  -2   5  -2 3247.77 180.471   8
   2   5   2 3095.05 153.435  12
   2   5   2 3039.67 159.160  11
  -2   5  -3 2607.41 174.006   8
   2   5   3 2740.44 167.162  12
  -2  -5   3 2767.83 195.720  10
  -2   5  -4 3763.96 220.861   8
   2   5   4 3756.39 215.559  12
  -2  -5   4 4183.03 261.716  10
   2   5   5 12927.5 461.357   7
   2   5   5 12684.3 453.979  12
  -2   5  -5 13024.6 433.500   8
   2   5   6 13430.0 515.025   7
  -2   5  -6 13472.6 470.111   8
  -2   5  -7 26377.5 695.046   8
   2   5   7 27111.0 774.458   7
   2   5   8 94.1694 103.495   7
  -2   5  -8 234.139 86.0761   8
  -2   5  -8 143.679 81.9884   9
   2   5   9 2791.11 314.842   7
  -2   5  -9 2924.65 242.693   9
  -2   5  -9 2176.75 219.248   8
   2   5  10 3642.52 376.995   7
  -2  -5  10 3730.13 447.238   6
   2   5  10 3592.43 512.453  13
  -2  -5  11 4305.85 447.012   3
   2   5  11 4799.11 436.627   7
  -2  -5  11 4171.07 510.261   6
   2   5  11 4811.74 590.233  13
   2   5  12 6692.19 538.911   7
  -2  -5  12 7243.87 669.268   6
   2   5  12 7189.89 758.630  13
  -2  -5  12 7280.55 608.453   3
  -2  -5  13 1714.36 334.379   6
  -2  -5  14 1639.27 385.122   6
  -2  -5  15 802.261 239.932   6
  -2  -5  16 306.536 156.313   6
  -2  -5  17-137.393 122.046   6
   2  -6  16 473.352 207.053   6
   2  -6  15 122.874 173.897   6
   2  -6  14 5458.98 575.052   6
   2  -6  14 7233.53 640.783   3
   2  -6  13 707.253 263.770   6
   2  -6  13 1008.93 275.562   3
  -2   6  12 5641.24 489.729   7
   2  -6  12 6083.76 630.435   6
   2  -6  12 6676.77 628.188   3
  -2   6  11 1754.20 279.070   7
  -2   6  11 1938.16 399.031  13
   2  -6  11 1304.32 340.191   6
   2  -6  11 1246.36 295.712   3
   2  -6  10 737.762 228.977   6
  -2   6  10 562.212 242.082  13
   2  -6  10 650.876 194.992   3
  -2   6  10 754.188 195.801   7
  -2   6   9 423.328 139.217   7
  -2   6   8 2250.23 246.752   7
  -2   6   8 2066.04 291.228  12
  -2   6   7 23831.4 738.977   7
  -2   6   7 22957.0 869.064  12
  -2   6   6 22391.3 669.416   7
  -2   6   6 22602.9 805.178  12
  -2   6   5 23548.9 766.626  12
  -2   6   4 27303.4 651.992  10
  -2   6   4 27219.0 770.160  12
  -2   6   3 8347.44 333.488  10
  -2   6   3 8337.29 389.912  12
  -2   6   2 10262.0 290.877   8
  -2   6   2 11008.5 313.442  11
  -2   6   1 37241.9 532.386   8
  -2   6   0 448.307 69.8486   8
  -2   6  -1 37303.5 574.272   8
   2   6   2 10256.1 304.647  11
  -2   6  -2 10748.1 329.506   8
  -2   6  -3 8368.85 311.361   8
   2   6   3 8789.99 309.873  12
  -2  -6   3 8884.31 335.714  10
  -2  -6   4 27889.4 653.801  10
   2   6   4 27550.0 607.111  12
  -2   6  -4 26624.4 584.369   8
  -2   6  -5 23213.3 577.683   8
   2   6   5 23375.6 620.026  12
  -2   6  -6 22257.3 600.783   8
   2   6   6 22666.9 677.421   7
   2   6   7 24871.0 763.190   7
  -2   6  -7 24273.9 662.624   8
  -2   6  -8 2305.00 213.836   8
   2   6   8 2256.10 249.094   7
  -2   6  -8 2287.38 211.691   9
  -2   6  -9 502.111 121.345   8
   2   6   9 504.433 157.184   7
  -2   6  -9 639.310 138.632   9
   2   6  10 843.252 218.525   7
  -2  -6  10 727.934 201.271   3
  -2  -6  10 934.465 240.734   6
   2   6  10 827.001 279.905  13
   2   6  11 1635.49 261.589   7
  -2  -6  11 1381.66 293.881   6
   2   6  11 1831.42 388.623  13
  -2  -6  11 1437.05 272.969   3
  -2  -6  12 6287.62 558.096   3
   2   6  12 5878.44 511.511   7
  -2  -6  12 6774.80 644.636   6
   2   6  12 6116.84 698.980  13
  -2  -6  13 275.559 203.270   6
   2   6  13 363.163 234.406  13
  -2  -6  14 5967.38 599.468   6
  -2  -6  15 228.628 160.067   6
  -2  -6  16 516.850 183.601   6
  -2  -6  17-96.6088 96.3304   6
   2  -7  16 533.080 195.818   6
   2  -7  15 385.711 212.455   6
   2  -7  14 825.569 283.082   6
   2  -7  14 1375.52 358.289   3
   2  -7  13 2425.18 419.505   6
   2  -7  13 1971.34 362.374   3
  -2   7  12 4947.41 458.337   7
   2  -7  12 5271.82 578.487   6
   2  -7  12 5764.03 592.343   3
   2  -7  11 646.268 224.348   3
  -2   7  11 605.399 163.707   7
   2  -7  11 777.964 251.883   6
  -2   7  11 630.058 228.359  13
  -2   7  10 2758.87 410.123  13
  -2   7  10 2762.43 318.782   7
   2  -7  10 3188.20 441.857   6
   2  -7  10 2362.10 350.031   3
  -2   7   9 29.5026 68.1073   7
  -2   7   8 1627.60 261.989  12
  -2   7   8 1736.65 224.495   7
  -2   7   7 10943.6 518.365   7
  -2   7   7 10502.2 598.882  12
  -2   7   6 15281.5 562.013   7
  -2   7   6 15074.7 678.228  12
  -2   7   5 1415.25 210.623  12
  -2   7   4 16809.3 618.461  12
  -2   7   4 16986.7 521.558  10
  -2   7   3 9181.82 424.709  12
  -2   7   3 9767.50 343.919  11
  -2   7   3 9667.94 354.370  10
  -2   7   2 2042.70 143.219   8
  -2   7   2 1845.63 141.440  10
  -2   7   2 1996.01 145.427  11
  -2   7   1 19174.4 406.998   8
  -2   7   0 12.5338 42.0087   8
  -2   7  -1 19455.4 430.382   8
   2   7   2 1882.27 144.836  11
  -2   7  -2 1986.01 149.438   8
  -2   7  -3 9349.88 336.570   8
   2   7   3 9713.19 342.013  12
  -2  -7   3 10173.1 358.402  10
  -2   7  -4 17305.1 477.583   8
  -2  -7   4 17565.0 523.349  10
   2   7   4 17814.4 507.055  12
  -2   7  -5 1508.53 160.570   8
   2   7   5 1383.23 162.295  12
   2   7   6 15320.3 564.579   7
  -2   7  -6 15060.4 495.312   8
   2   7   6 15188.9 571.241  12
   2   7   7 11653.7 533.516   7
  -2   7  -7 11443.6 453.891   8
   2   7   8 1542.55 211.794   7
  -2   7  -8 1897.01 199.719   9
  -2   7  -8 1943.00 199.429   8
  -2   7  -9 246.163 102.967   9
   2   7   9-1.62622 95.1422   7
   2   7  10 2367.36 412.810  13
   2   7  10 2308.12 300.253   7
  -2  -7  10 2670.56 353.958   3
  -2  -7  10 2514.79 388.892   6
   2   7  11 649.677 182.878   7
  -2  -7  11 442.924 176.454   3
  -2  -7  11 592.364 233.001   6
   2   7  11 498.735 250.193  13
  -2  -7  12 5280.25 515.717   3
   2   7  12 5608.74 653.123  13
  -2  -7  12 4944.29 559.531   6
  -2  -7  13 1157.98 309.713   6
  -2  -7  13 1944.41 329.765   3
   2   7  13 1752.68 403.184  13
  -2  -7  14 1220.22 331.979   6
  -2  -7  15 351.733 164.943   6
  -2  -7  16 406.772 148.264   6
  -2  -7  17 35.7029 102.924   6
   2  -8  16 161.646 131.532   6
   2  -8  15 708.255 235.757   6
   2  -8  14 1879.27 364.164   3
   2  -8  14 1312.97 315.739   6
   2  -8  13 1175.50 284.335   3
   2  -8  13 1052.18 284.590   6
   2  -8  12 1676.27 349.244   6
  -2   8  12 2491.13 451.567  13
   2  -8  12 1942.40 352.231   3
   2  -8  11 992.736 284.918   6
  -2   8  11 1208.58 223.336   7
  -2   8  11 1127.86 290.575  13
   2  -8  11 651.497 209.707   3
   2  -8  10 397.328 150.979   3
  -2   8  10 462.645 153.657   7
   2  -8  10 424.886 220.127   6
  -2   8  10 731.506 251.124  13
  -2   8   9 133.837 89.4433   7
  -2   8   8 1548.29 214.509   7
  -2   8   8 1595.61 259.831  12
  -2   8   7 2363.33 301.675  12
  -2   8   7 2273.06 246.315   7
  -2   8   6-110.416 116.062  12
  -2   8   5 14123.2 629.490  12
  -2   8   4 766.304 155.640  12
  -2   8   3 4427.65 242.706  10
  -2   8   3 4563.63 143.104   9
  -2   8   3 4144.05 305.817  12
  -2   8   3 4530.29 247.114  11
  -2   8   2 5123.58 231.244  10
  -2   8   2 5433.55 247.236  11
  -2   8   2 5329.29 235.617   8
  -2   8   1 25011.2 488.726   8
  -2   8   0 6235.47 247.688   8
  -2   8  -1 24510.6 502.503   8
   2   8   2 5348.00 248.551  11
  -2  -8   2 5895.69 245.398  10
  -2   8  -2 5458.21 248.233   8
  -2  -8   3 4607.37 248.873  10
   2   8   3 4504.68 246.527  12
   2   8   3 4298.65 248.428  11
  -2   8  -3 4542.69 243.936   8
  -2   8  -4 755.144 115.461   8
  -2  -8   4 785.956 100.487   1
   2   8   4 1091.62 146.300  12
  -2  -8   4 858.775 129.484  10
   2   8   5 14488.7 520.342  12
  -2   8  -5 13736.5 453.857   8
   2   8   6 133.456 68.9074  12
  -2   8  -6 55.9401 52.5100   8
  -2   8  -7 2380.86 215.976   8
   2   8   7 2334.69 255.036   7
  -2   8  -7 2152.05 205.869   9
   2   8   8 1460.88 208.332   7
  -2   8  -8 1315.92 170.706   9
  -2   8  -8 1440.07 170.359   8
  -2   8  -9 43.0178 79.7524   9
   2   8   9 151.236 104.255   7
   2   8  10 475.276 148.532   7
   2   8  10 825.680 295.146  13
  -2  -8  10 402.361 133.403   3
  -2  -8  10 726.303 260.412   6
  -2  -8  11 1228.95 255.832   3
   2   8  11 1129.31 219.985   7
  -2  -8  11 1107.52 252.172   6
   2   8  11 1181.36 307.966  13
  -2  -8  12 2078.96 360.837   6
  -2  -8  12 1914.75 326.721   3
   2   8  12 1973.98 407.138  13
  -2  -8  13 1444.40 323.020   6
  -2  -8  13 1595.90 297.012   3
   2   8  13 1531.21 376.047  13
  -2  -8  14 1806.72 367.345   6
  -2  -8  15 825.088 261.203   6
  -2  -8  16 273.576 153.661   6
  -2  -8  17 166.252 102.381   6
   2  -9  15 1106.92 293.282   6
   2  -9  14 5437.14 577.155   6
   2  -9  14 6538.26 595.161   3
   2  -9  13 263.746 206.865   6
   2  -9  13 811.907 246.662   3
   2  -9  12 99.0661 142.767   6
   2  -9  12 454.402 202.133   3
   2  -9  11 310.557 165.485   3
  -2   9  11 351.882 144.421   7
   2  -9  11 575.168 255.307   6
  -2   9  11 355.897 192.571  13
  -2   9  10 578.327 160.347   7
  -2   9  10 762.256 245.650  13
   2  -9  10 507.069 219.249   6
  -2   9   9 1922.05 251.670   7
  -2   9   9 1804.08 294.771  12
  -2   9   8 2536.29 324.474  12
  -2   9   8 2049.18 250.904   7
  -2   9   7 766.624 195.598  12
  -2   9   7 578.456 138.116   7
  -2   9   6 2933.89 315.522  12
  -2   9   5 42633.2 1106.19  12
  -2   9   4 9289.18 490.821  12
  -2   9   3 12113.8 397.607  10
  -2   9   3 12147.1 252.165   9
  -2   9   3 12617.1 425.928  11
  -2   9   2 16991.7 432.820   8
  -2   9   2 17033.9 452.101  11
  -2   9   2 17281.5 420.810  10
  -2   9   1 24125.1 510.878   8
  -2   9   0 6767.95 273.307   8
  -2   9  -1 26607.4 544.371   8
  -2  -9   2 17164.8 416.242  10
  -2   9  -2 16873.4 450.475   8
   2   9   2 16333.1 449.076  11
  -2  -9   3 12605.9 399.330  10
  -2   9  -3 12186.9 401.665   8
  -2  -9   3 11741.6 393.325   1
   2   9   3 12274.2 425.510  12
   2   9   3 12112.5 416.451  11
  -2   9  -4 9345.33 367.182   8
   2  -9  -4 9612.01 498.972   1
   2   9   4 9778.56 411.123  12
  -2  -9   4 9139.54 321.275   1
   2  -9  -5 42948.2 1078.50   1
   2   9   5 42620.4 917.057  12
  -2   9  -5 40885.1 790.355   8
  -2   9  -6 3302.13 237.796   8
   2   9   6 3140.32 270.454  12
  -2   9  -7 518.955 112.776   8
   2   9   7 585.613 133.963   7
   2   9   7 555.324 133.617  12
  -2   9  -7 381.990 97.0498   9
  -2   9  -8 2314.25 214.797   8
   2   9   8 2145.09 257.341   7
  -2   9  -8 2239.93 233.085   9
   2   9   9 1937.42 260.702   7
  -2   9  -9 1631.17 208.240   9
   2   9  10 644.103 172.817   7
  -2  -9  10 572.304 165.164   3
  -2  -9  10 505.858 224.174   6
   2   9  10 558.471 225.230  13
   2   9  11 448.885 162.920   7
   2   9  11 146.606 182.745  13
  -2  -9  11 591.078 228.616   6
  -2  -9  11 176.912 127.314   3
   2   9  12 640.646 264.723  13
  -2  -9  12 902.753 226.569   3
  -2  -9  12 882.883 283.370   6
  -2  -9  13 221.747 197.753   6
  -2  -9  13 562.918 197.286   3
   2   9  13 622.940 255.096  13
  -2  -9  14 5715.56 583.247   6
  -2  -9  15 912.595 249.058   6
  -2  -9  16 163.568 125.313   6
  -2  -9  17 310.207 138.551   6
   2 -10  15 2681.76 384.441   6
   2 -10  14 1263.33 313.128   6
   2 -10  14 2086.78 369.342   3
   2 -10  13 469.218 215.194   6
   2 -10  13 1084.32 286.143   3
   2 -10  12 1215.06 310.880   6
  -2  10  12 1202.81 336.473  13
   2 -10  12 892.937 249.809   3
  -2  10  11 1424.59 253.830   7
  -2  10  11 2148.40 393.729  13
   2 -10  11 1373.57 319.729   6
   2 -10  11 1149.00 265.963   3
   2 -10  10 883.101 287.637   6
  -2  10  10 716.827 191.965   7
  -2  10  10 799.483 277.441  13
  -2  10   9 219.612 102.533   7
  -2  10   9 292.753 145.430  12
  -2  10   8 56.8292 86.4410   7
  -2  10   8 111.688 102.443  12
  -2  10   7 967.196 216.888  12
  -2  10   7 950.631 177.976   7
  -2  10   6 3193.94 341.612  12
  -2  10   5 26395.2 894.537  12
  -2  10   4 8475.99 482.358  12
  -2  10   3 10328.4 366.933  10
  -2  10   3 10845.8 408.225  11
  -2  10   3 10288.6 249.594   9
  -2  10   2 21788.1 409.436   9
  -2  10   2 20152.4 497.147   8
  -2  10   2 20745.3 525.634  11
  -2  10   2 20430.2 452.515  10
  -2  10   1 29409.7 592.263   8
  -2  10   0 1638.46 143.752   8
  -2  10  -1 28998.7 588.150   8
  -2  10  -2 20282.8 509.411   8
   2  10   2 20316.5 521.568  11
  -2 -10   2 21631.0 468.355  10
   2  10   3 10650.4 407.574  11
  -2 -10   3 10243.9 397.378   1
   2 -10  -3 10523.2 534.820   1
  -2  10  -3 10364.1 378.212   8
  -2 -10   3 10500.0 362.855  10
   2 -10  -4 8888.97 503.165   1
  -2 -10   4 8419.76 343.983   1
  -2  10  -4 9002.94 364.771   8
   2  10   4 9617.55 422.075  12
   2 -10  -5 26382.9 884.432   1
   2  10   5 26216.8 743.258  12
  -2  10  -5 25451.3 635.013   8
   2  10   6 3141.17 283.172  12
  -2  10  -6 3346.90 245.920   8
  -2  10  -6 3350.98 255.515   9
   2  10   7 797.166 157.742   7
  -2  10  -7 796.591 147.869   9
  -2  10  -7 1140.44 154.492   8
   2  10   7 852.409 176.763  12
   2  10   8 108.789 89.7597   7
  -2  10  -8-80.9486 95.2136   9
  -2  10  -8 25.9674 50.1126   8
  -2  10  -9 309.588 113.323   9
   2  10   9 176.656 104.156   7
   2  10  10 779.348 187.433   7
  -2 -10  10 652.054 239.113   6
  -2 -10  10 923.723 225.866   3
   2  10  10 764.357 262.448  13
   2  10  11 1458.17 363.030  13
   2  10  11 1597.19 274.172   7
  -2 -10  11 1538.47 280.366   3
  -2 -10  11 1230.09 321.400   6
  -2 -10  12 1057.46 260.732   3
  -2 -10  12 905.485 288.138   6
   2  10  12 637.954 278.857  13
   2  10  13 554.966 253.372  13
  -2 -10  13 494.574 245.907   6
  -2 -10  13 663.512 211.005   3
   2  10  14 1333.13 374.809  13
  -2 -10  14 1552.02 321.811   6
  -2 -10  15 2405.18 355.430   6
  -2 -10  16 457.601 164.407   6
  -2 -10  17 447.630 136.579   6
   2 -11  15 112.333 126.619   6
   2 -11  14 271.314 193.256   6
   2 -11  14 479.316 215.104   3
   2 -11  13 944.867 258.122   6
   2 -11  13 1487.22 300.027   3
   2 -11  12 3981.01 490.453   3
  -2  11  12 4112.67 545.848  13
   2 -11  12 3462.40 477.143   6
   2 -11  11 709.772 266.422   6
  -2  11  11 262.478 112.913   7
   2 -11  11 554.547 195.082   3
  -2  11  11 832.882 252.955  13
   2 -11  10 1902.98 358.183   6
  -2  11  10 2710.47 440.297  13
  -2  11  10 2193.13 305.950   7
  -2  11   9 1070.30 201.273   7
   2 -11   9 944.324 284.372   6
  -2  11   9 1425.78 281.775  12
  -2  11   8-79.1322 116.002  12
  -2  11   8-8.99629 79.2222   7
  -2  11   7 10437.1 651.391  12
  -2  11   6 375.521 130.600  12
  -2  11   5 5332.55 421.395  12
  -2  11   4 7136.06 449.554  12
  -2  11   3 6285.36 322.745  11
  -2  11   3 5751.62 198.682   9
  -2  11   2 247.419 64.8823   9
  -2  11   2 408.186 77.8429  10
  -2  11   2 315.585 110.104  11
  -2  11   1 1251.25 103.806  10
  -2  11   1 1448.26 127.500   9
  -2  11   1 1353.11 146.232   8
  -2  11   0 3134.05 205.981   8
  -2  11  -1 1386.75 143.569   8
   2  11   2 376.994 113.436  11
  -2 -11   2 238.576 65.1329  10
  -2  11  -2 360.478 88.6268   8
  -2  11  -3 5724.97 290.952   8
   2 -11  -3 6102.83 436.226   1
   2  11   3 5851.39 318.702  11
  -2 -11   3 5744.00 319.742   1
  -2 -11   3 5894.15 272.393  10
   2 -11  -4 7723.06 492.258   1
  -2 -11   4 6943.74 330.457   1
  -2  11  -4 7255.43 335.768   8
   2  11   4 7145.60 378.494  12
   2 -11  -5 5768.39 447.966   1
   2  11   5 5739.12 367.008  12
  -2  11  -5 5716.48 322.180   9
  -2  11  -5 5792.23 312.454   8
  -2  11  -6 533.570 114.089   8
  -2  11  -6 753.765 136.958   9
   2  11   6 839.942 158.308  12
   2  11   7 10071.6 535.641   7
  -2  11  -7 10494.2 443.809   8
  -2  11  -7 10053.5 477.875   9
   2  11   7 10356.2 545.581  12
   2  11   8 30.1927 71.6258   7
  -2  11  -8 108.786 74.6947   9
  -2  11  -8 85.9584 55.3818   8
   2  11   9 1005.22 207.212   7
  -2 -11   9 1362.80 281.246   6
   2  11   9 935.180 255.435  13
  -2  11  -9 1537.79 220.287   9
   2  11  10 2160.13 300.874   7
  -2 -11  10 2369.22 400.863   6
   2  11  10 2593.16 440.155  13
  -2 -11  10 2166.54 317.203   3
  -2 -11  11 487.129 168.035   3
  -2 -11  11 631.829 253.808   6
   2  11  11 603.823 244.122  13
   2  11  11 133.691 92.7398   7
  -2 -11  12 3292.18 470.010   6
   2  11  12 4092.29 565.503  13
  -2 -11  12 3831.94 442.334   3
   2  11  13 1059.85 340.992  13
  -2 -11  13 1387.86 313.990   6
  -2 -11  13 1439.37 277.725   3
   2  11  14 163.381 219.125  13
  -2 -11  14 154.506 152.966   6
  -2 -11  15 343.470 193.848   6
  -2 -11  16-241.278 122.432   6
  -2 -11  17 98.1404 88.0612   6
   2 -12  15 441.910 192.621   6
   2 -12  15 386.916 164.322   3
   2 -12  14 1112.32 291.928   6
   2 -12  14 1290.50 274.659   3
   2 -12  13 726.137 250.432   6
   2 -12  13 692.039 242.932   3
  -2  12  12 1406.28 337.210  13
   2 -12  12 1229.91 320.912   6
   2 -12  12 1395.38 314.764   3
  -2  12  11 1299.13 320.074  13
  -2  12  11 812.208 196.002   7
   2 -12  11 357.999 182.724   6
   2 -12  11 894.431 230.349   3
  -2  12  10 1063.76 215.810   7
   2 -12  10 1246.48 313.320   6
  -2  12  10 1394.23 326.133  13
  -2  12   9 170.264 143.268  12
   2 -12   9 1.89603 162.356   6
  -2  12   9 8.16027 86.5222   7
  -2  12   9 73.2337 140.108  13
  -2  12   8 1105.50 221.516  12
  -2  12   8 993.814 190.880   7
  -2  12   7 399.397 152.197  12
  -2  12   6 2662.68 333.356  12
  -2  12   5 7708.07 512.659  12
  -2  12   4 2184.49 262.626  12
  -2  12   4 2486.83 223.691  11
  -2  12   3 6810.83 348.687  11
  -2  12   2 2106.65 198.019  11
  -2  12   2 2238.39 153.964   9
  -2  12   1 9104.85 257.387  10
  -2  12   1 9335.55 372.589   8
  -2  12   1 10103.7 338.443   9
  -2  12   0 1724.18 168.299   8
  -2  12   0 1908.16 161.044   9
  -2  12  -1 9622.16 373.768   8
  -2 -12   1 8651.55 258.686  10
  -2  12  -2 2058.81 179.694   8
   2  12   2 2137.91 203.368  11
  -2 -12   2 1995.17 143.689  10
   2 -12  -3 6825.24 479.250   1
  -2  12  -3 6786.01 326.939   8
  -2 -12   3 7224.21 369.198   1
   2  12   3 7073.61 360.706  11
  -2  12  -4 2419.56 203.246   8
   2 -12  -4 2496.21 306.650   1
   2  12   4 2489.20 239.461  12
   2  12   4 2166.43 208.614  11
  -2 -12   4 2314.22 212.886   1
  -2  12  -4 2332.60 215.031   9
   2 -12  -5 7279.23 511.262   1
  -2  12  -5 7403.81 361.434   8
   2  12   5 8304.72 455.611  12
  -2  12  -5 7205.60 372.712   9
  -2  12  -6 2811.80 234.220   8
   2  12   6 2611.53 272.896  12
  -2  12  -6 2654.09 243.044   9
   2  12   7 409.428 150.560  12
  -2  12  -7 668.805 124.454   8
  -2  12  -7 438.018 121.329   9
  -2  12  -8 1037.65 146.862   8
   2  12   8 1014.46 195.600   7
   2  12   8 631.094 153.280  12
  -2  12  -8 839.504 160.856   9
  -2  12  -9 161.469 113.695   9
   2  12   9 47.2583 90.0414   7
  -2 -12   9 139.980 168.741   6
   2  12   9 54.5565 121.387  13
   2  12  10 1150.90 225.926   7
   2  12  10 1661.92 368.642  13
  -2 -12  10 1105.40 273.317   6
  -2 -12  10 1180.31 249.600   3
  -2 -12  11 805.018 212.703   3
   2  12  11 616.835 181.852   7
   2  12  11 960.973 309.165  13
  -2 -12  11 1062.73 289.131   6
   2  12  12 1132.31 337.338  13
  -2 -12  12 1013.31 252.547   3
  -2 -12  12 862.417 291.506   6
  -2 -12  13 500.984 222.505   6
  -2 -12  13 660.468 203.952   3
   2  12  13 676.268 270.912  13
   2  12  14 1209.45 328.262  13
  -2 -12  14 988.712 284.794   6
  -2 -12  15 410.594 152.747   6
  -2 -12  16-109.083 131.714   6
  -2 -12  17 372.805 130.516   6
   2 -13  15 80.9635 134.245   6
   2 -13  15 334.262 146.393   3
   2 -13  14 1085.70 284.154   6
   2 -13  14 2070.98 348.761   3
   2 -13  13 258.653 230.805   6
   2 -13  13 354.316 175.328   3
  -2  13  13 280.199 152.923  13
   2 -13  12 578.728 191.439   6
   2 -13  12 424.065 191.368   3
  -2  13  12 536.627 208.989  13
  -2  13  11 1511.19 319.083  13
  -2  13  11 1664.23 277.012   7
   2 -13  11 1437.53 319.168   6
  -2  13  10 366.253 149.016   7
  -2  13  10 530.927 223.141   5
   2 -13  10 735.197 234.030   6
  -2  13  10 942.888 279.501  13
  -2  13  10 698.035 204.979  12
  -2  13   9 2005.94 280.952   7
  -2  13   9 2389.78 363.366  12
   2 -13   9 1936.89 373.126   6
  -2  13   9 3000.04 425.627  13
  -2  13   9 1954.28 354.258   5
  -2  13   8 294.302 116.454   7
  -2  13   8 270.931 138.632  12
  -2  13   7 2808.64 356.783  12
  -2  13   6 1729.41 286.921  12
  -2  13   5 505.234 157.594  12
  -2  13   4 3487.52 345.228  12
  -2  13   4 3224.66 258.867  11
  -2  13   3 16538.8 561.885  11
  -2  13   2 6206.67 338.317  11
  -2  13   2 6359.55 262.764   9
  -2  13   1 5359.23 259.019   9
  -2  13   1 4853.31 284.829   8
  -2  13   0 671.889 111.716   8
  -2  13   0 783.588 114.318   9
  -2  13  -1 4809.20 280.218   8
  -2 -13   1 4931.14 194.702  10
  -2  13  -1 5283.47 275.526   9
  -2 -13   2 5947.75 367.218   1
  -2 -13   2 6252.45 242.028  10
  -2  13  -2 5868.88 307.445   8
   2  13   2 6121.97 337.246  11
  -2  13  -2 6170.91 309.857   9
  -2  13  -3 16048.3 510.934   8
   2  13   3 16387.7 563.452  11
  -2 -13   3 16349.4 589.246   1
   2 -13  -3 16694.2 760.669   1
  -2  13  -3 16845.3 526.859   9
  -2  13  -4 3147.53 240.928   8
   2 -13  -4 3540.56 364.977   1
  -2 -13   4 3550.48 275.522   1
   2  13   4 3597.23 296.646  12
  -2  13  -4 3607.34 266.486   9
   2  13   4 3023.82 254.742  11
   2 -13  -5 478.182 153.949   1
   2  13   5 562.766 143.910  12
  -2  13  -5 619.273 122.954   8
  -2  13  -5 593.640 129.953   9
  -2  13  -6 1712.63 188.557   8
  -2  13  -6 1676.13 207.518   9
   2  13   6 2079.21 254.005  12
  -2  13  -7 3025.31 250.706   8
   2  13   7 2868.23 312.254  12
  -2  13  -7 2623.31 262.109   9
  -2  13  -8 271.296 110.264   9
   2  13   8 293.302 122.680   7
   2  13   8 360.329 120.805  12
  -2  13  -9 1940.73 252.685   9
   2  13   9 2174.97 299.635   7
   2  13   9 2315.67 421.354  13
  -2 -13   9 2210.91 361.242   6
   2  13  10 464.602 152.869   7
   2  13  10 586.082 267.526  13
  -2 -13  10 670.172 237.966   6
  -2 -13  10 491.544 168.674   3
   2  13  11 1706.21 389.406  13
  -2 -13  11 1525.90 321.124   6
  -2 -13  11 1529.55 297.169   3
   2  13  11 1469.92 276.096   7
  -2 -13  12 714.132 216.434   3
  -2 -13  12 303.661 192.839   6
   2  13  12 520.615 234.698  13
   2  13  13 425.173 229.916  13
  -2 -13  13 89.7332 140.849   6
  -2 -13  13 122.312 133.207   3
  -2 -13  14 1132.18 279.972   6
  -2 -13  14 1206.12 236.927   3
   2  13  14 1233.07 303.687  13
  -2 -13  15 112.876 144.510   6
  -2 -13  16 353.947 140.706   6
  -2 -13  17 372.130 110.226   6
   2 -14  15 170.106 123.862   6
   2 -14  15 801.062 214.222   3
   2 -14  14 0.36066 97.0703   3
   2 -14  14 451.321 188.966   6
   2 -14  13 1739.07 355.278   6
   2 -14  13 1908.57 339.853   3
  -2  14  13 1998.73 396.170  13
   2 -14  12-84.6482 143.672   3
  -2  14  12 227.238 175.976  13
   2 -14  12 279.307 146.683   6
  -2  14  11 251.765 208.959  13
   2 -14  11 203.929 172.773   6
  -2  14  10 157.257 91.9130   7
  -2  14  10 78.8474 158.066   5
   2 -14  10 458.190 223.974   6
  -2  14  10 370.764 148.226  12
  -2  14  10 686.069 237.360  13
  -2  14   9 408.158 130.629   7
   2 -14   9 71.7175 144.315   6
  -2  14   9 469.913 160.580   5
  -2  14   9 204.811 142.455  13
  -2  14   9 245.648 141.956  12
  -2  14   8 4435.61 474.958  12
  -2  14   8 4174.28 394.572   7
  -2  14   7 1057.41 228.618  12
  -2  14   6 1249.47 246.288  12
  -2  14   5 242.615 139.579  12
  -2  14   4 824.435 141.847  11
  -2  14   4 800.281 198.892  12
  -2  14   3 13318.3 520.832  11
  -2  14   2 50321.3 969.294  11
  -2  14   2 52995.7 782.292   9
  -2  14   1 9126.79 398.902   8
  -2  14   1 9636.08 362.582   9
  -2  14   0 813.186 118.014   9
  -2  14   0 931.724 144.149   8
  -2  14  -1 9717.43 405.682   8
  -2  14  -1 9765.43 391.112   9
  -2  14  -2 49818.8 919.268   8
  -2 -14   2 52047.1 1119.63   1
  -2  14  -2 52083.6 922.733   9
   2  14   2 50997.9 985.902  11
  -2  14  -3 12720.8 472.766   8
   2 -14  -3 13721.4 721.818   1
   2  14   3 13087.2 526.272  11
  -2 -14   3 13303.3 565.981   1
  -2  14  -3 13193.1 488.623   9
  -2 -14   4 939.429 164.449   1
  -2  14  -4 873.056 134.742   8
   2 -14  -4 566.087 162.901   1
   2  14   4 682.469 138.520  12
  -2  14  -4 730.249 138.966   9
   2  14   4 708.211 138.275  11
  -2  14  -5 179.569 90.7080   9
  -2  14  -5 275.473 93.0864   8
   2 -14  -5 282.182 101.869   1
   2  14   5 294.402 107.585  12
  -2  14  -6 1235.14 167.542   8
  -2  14  -6 1104.33 173.516   9
   2  14   6 1260.95 210.078  12
  -2  14  -7 983.571 152.266   8
  -2  14  -7 827.187 170.117   9
   2  14   7 982.332 188.728  12
   2  14   8 4335.80 407.484   7
   2  14   8 4557.96 417.865  12
  -2  14  -8 4071.42 345.699   9
   2  14   9 278.101 118.114   7
  -2  14  -9 307.187 139.025   9
   2  14   9 340.243 208.757  13
  -2 -14   9 39.5917 142.629   6
  -2 -14  10 317.021 186.691   6
   2  14  10 576.812 168.702   7
   2  14  10 385.376 193.311  13
  -2 -14  11 231.017 169.457   6
   2  14  11 237.421 193.204  13
  -2 -14  11 191.429 123.834   3
  -2 -14  12 218.019 196.694   6
  -2 -14  12 75.1118 90.7128   3
   2  14  12 333.634 216.235  13
  -2 -14  13 1863.71 346.806   6
   2  14  13 1813.97 387.275  13
  -2 -14  13 1601.30 273.321   3
  -2 -14  14 63.1443 151.041   6
  -2 -14  14 188.765 120.823   3
   2  14  14-51.6220 134.389  13
  -2 -14  15 647.664 205.215   6
  -2 -14  16 973.852 207.621   6
  -2 -14  17 533.270 128.077   6
   2 -15  15 176.392 115.254   3
   2 -15  14 92.9655 124.972   6
   2 -15  14-101.366 130.065   3
  -2  15  13 312.675 179.548  13
   2 -15  13 429.879 220.004   6
   2 -15  13 471.229 168.477   3
   2 -15  12 160.995 168.228   6
  -2  15  12 8.34020 113.926  13
   2 -15  12-214.871 150.235   3
  -2  15  11 765.536 225.374   5
  -2  15  11 1056.09 298.901  13
   2 -15  11 810.216 274.223   6
   2 -15  10-35.9259 140.414   6
  -2  15  10-150.029 134.420   5
  -2  15  10 56.1643 166.942  13
  -2  15  10 139.746 86.0448   7
  -2  15  10 14.1135 120.039  12
  -2  15   9 1152.53 282.367  13
  -2  15   9 1188.89 293.574   5
   2 -15   9 517.317 253.867   6
  -2  15   9 919.075 221.527   7
  -2  15   9 1025.45 253.125  12
  -2  15   8 236.039 151.544   5
  -2  15   8 31.5565 111.820  12
   2 -15   8 40.6484 90.0971   4
  -2  15   8 40.5151 100.813   7
  -2  15   7 2462.49 354.327  12
  -2  15   6 544.264 179.659  12
  -2  15   5 368.268 155.585  12
  -2  15   4 798.083 199.730  12
  -2  15   4 909.371 149.000  11
  -2  15   3 12551.8 530.030  11
  -2  15   2 33841.8 839.010  11
  -2  15   1 22353.4 574.841   9
  -2  15   0 1466.11 165.291   9
  -2  15   0 1195.02 157.932   8
  -2  15  -1 21328.2 622.101   8
  -2  15  -1 21753.3 610.131   9
  -2  15  -2 32453.6 770.070   8
  -2 -15   2 32497.4 932.068   1
   2  15   2 33171.4 834.870  11
  -2  15  -2 33417.9 778.536   9
   2 -15  -3 12496.0 724.045   1
   2  15   3 12178.5 528.431  11
  -2  15  -3 12358.4 485.818   8
  -2  15  -3 12168.9 492.275   9
  -2 -15   3 11738.6 552.791   1
   2 -15  -4 843.187 197.227   1
  -2 -15   4 903.447 159.807   1
   2  15   4 731.346 218.030  11
  -2  15  -4 714.142 144.990   9
   2  15   4 821.282 163.679  12
  -2  15  -4 945.620 149.041   8
  -2  15  -5 667.752 148.608   9
  -2  15  -5 476.072 106.340   8
   2 -15  -5 495.953 182.286   1
   2  15   5 605.697 153.365  12
  -2  15  -6 584.486 117.326   8
  -2  15  -6 412.638 126.616   9
   2  15   6 601.816 154.130  12
  -2  15  -7 2627.15 240.890   8
  -2  15  -7 2471.16 276.444   9
   2  15   7 2681.93 312.968  12
  -2  15  -8-111.578 119.072   9
   2  15   8-95.2334 121.737   7
  -2  15  -9 864.989 180.900   9
   2  15   9 1190.69 335.532  13
   2  15   9 628.758 169.459   7
  -2 -15   9 694.781 223.237   6
   2  15  10 27.0853 105.114   7
   2  15  10 182.436 170.083  13
   2  15  11 916.580 305.314  13
  -2 -15  11 1155.09 315.692   6
  -2 -15  11 822.441 217.740   3
   2  15  12 21.2158 147.228  13
  -2 -15  12-157.278 151.703   6
  -2 -15  12 13.4811 83.1895   3
  -2 -15  13 344.738 219.489   6
   2  15  13 462.159 217.298  13
  -2 -15  13 363.700 150.873   3
  -2 -15  14 20.7429 137.304   6
  -2 -15  14 142.493 118.500   3
   2  15  14 238.880 172.705  13
  -2 -15  15 4.58110 120.182   6
  -2 -15  16 343.984 138.551   6
   2 -16  15 71.8108 92.0161   3
   2 -16  14 196.726 140.751   3
   2 -16  14 547.180 195.095   6
   2 -16  13 175.401 168.937   6
  -2  16  13 418.464 205.568  13
   2 -16  13 192.928 149.934   3
  -2  16  12 22.6840 168.458  13
   2 -16  12 135.613 164.611   6
   2 -16  12 55.3966 118.785   3
  -2  16  11 467.952 190.837   5
  -2  16  11 557.121 214.760  13
   2 -16  11 434.904 218.388   6
  -2  16  10 374.975 176.138  13
  -2  16  10 983.997 273.977   5
   2 -16  10 582.119 240.519   6
  -2  16  10 940.484 244.077   7
  -2  16  10 929.602 251.011  12
  -2  16   9 2108.07 381.751   5
  -2  16   9 2971.56 466.922  13
  -2  16   9 2310.19 329.910   7
   2 -16   9 2836.03 427.918   6
  -2  16   9 2462.40 389.756  12
  -2  16   8-28.0174 89.4350   7
  -2  16   8 118.615 162.051   5
   2 -16   8 134.327 132.440   6
  -2  16   8-45.3291 145.670  13
  -2  16   8 303.636 179.318  12
   2 -16   8-29.5344 117.402   4
  -2  16   7 528.015 174.754  12
  -2  16   6 753.004 215.671  12
  -2  16   5 3607.54 409.010  12
  -2  16   4 400.378 111.263  11
  -2  16   4 360.790 134.255  12
  -2  16   3 3336.53 290.370  11
  -2  16   2 12936.7 545.388  11
  -2  16   1 1155.01 144.636   9
  -2  16   0 725.064 139.071   8
  -2  16   0 680.405 131.681   9
  -2  16  -1 1121.51 159.372   8
  -2 -16   1 1205.95 206.998   1
  -2  16  -1 1055.98 164.368   9
  -2 -16   2 12330.4 601.987   1
  -2  16  -2 13002.8 506.539   8
   2  16   2 12742.5 540.847  11
  -2  16  -2 13103.2 514.345   9
  -2  16  -3 3261.99 263.151   8
   2  16   3 3365.48 300.477  11
  -2 -16   3 3101.37 316.516   1
  -2  16  -3 3349.34 275.786   9
   2  16   4 307.606 101.294  12
   2  16   4 251.940 106.291  11
  -2 -16   4 483.950 150.075   1
  -2  16  -4 352.659 104.704   8
   2 -16  -4 232.101 111.142   1
  -2  16  -4 491.302 129.704   9
  -2  16  -5 3735.07 288.956   8
   2  16   5 3760.23 352.664  12
  -2  16  -5 3774.10 313.176   9
  -2  16  -6 644.647 134.427   8
   2  16   6 636.363 165.273  12
  -2  16  -6 502.099 146.653   9
  -2  16  -7 714.839 165.204   9
   2  16   7 834.420 184.913  12
  -2  16  -7 643.892 128.280   8
  -2  16  -8-19.8717 91.8209   9
   2  16   8 144.950 116.490   7
  -2 -16   8 84.7208 144.820   6
   2  16   9 2971.26 488.351  13
  -2 -16   9 2358.69 372.360   6
   2  16   9 2310.07 332.087   7
   2  16  10 445.634 168.888   7
   2  16  10 677.152 263.071  13
  -2 -16  10 510.154 202.546   6
  -2 -16  11 349.950 195.775   6
  -2 -16  11 236.814 136.617   3
   2  16  11 502.006 240.294  13
  -2 -16  12 291.962 138.967   3
  -2 -16  12 190.660 175.427   6
   2  16  12 390.365 221.748  13
  -2 -16  13 119.421 126.247   6
  -2 -16  13 43.0574 87.2684   3
   2  16  13 292.779 235.627  13
  -2 -16  14 429.424 197.559   6
   2  16  14 193.648 175.200  13
  -2 -16  14 334.018 132.501   3
  -2 -16  15 123.615 98.8399   6
  -2 -16  16 79.7048 85.0409   6
   2 -17  15 159.282 92.6114   3
   2 -17  14 207.175 164.568   6
   2 -17  14 93.6448 125.913   3
  -2  17  13 289.814 195.527  13
   2 -17  13 566.626 201.878   6
   2 -17  13 334.422 181.431   3
  -2  17  12 244.478 151.721  13
   2 -17  12 229.804 151.729   6
   2 -17  12 274.158 154.740   3
   2 -17  11-80.8730 151.136   6
  -2  17  11-134.812 132.570  13
  -2  17  11-37.5898 97.6106   5
  -2  17  10 836.915 250.934  13
  -2  17  10 816.724 256.135   5
   2 -17  10 587.393 234.991   6
  -2  17   9 275.541 171.940  12
  -2  17   9 159.061 119.377   7
   2 -17   9 128.735 144.046   6
  -2  17   9-7.37138 130.454   5
  -2  17   9 317.810 168.344  13
   2 -17   8-12.8018 91.3601   4
  -2  17   8 439.731 197.138   5
  -2 -17  -8 89.7499 103.581   1
   2 -17   8 16.8968 144.741   6
  -2  17   8 111.509 149.138  13
  -2  17   8 161.363 142.768  12
  -2  17   7 1055.06 275.567   5
   2 -17   7 1058.93 224.490   4
  -2  17   7 711.143 207.896  12
  -2  17   6 125.093 128.434  12
  -2  17   5 182.939 119.038  12
  -2  17   4 2551.41 336.081  12
  -2  17   4 2865.94 288.158  11
  -2  17   3 5140.19 370.079  11
  -2  17   2 526.243 154.728  11
  -2  17   1 1959.69 196.734   9
  -2  17   0 35.0968 70.2503   9
  -2  17  -1 1975.42 212.757   8
  -2 -17   1 1784.29 264.442   1
  -2  17  -1 2085.99 220.837   9
  -2 -17   2 294.287 129.225   1
  -2  17  -2 315.981 100.691   8
  -2  17  -2 302.702 100.174   9
   2  17   2 557.643 159.888  11
  -2 -17   3 5150.17 414.924   1
  -2  17  -3 5673.23 357.983   8
   2  17   3 5147.65 379.229  11
  -2  17  -3 5733.13 362.456   9
  -2  17  -4 2942.30 265.010   8
  -2 -17   4 2561.96 286.773   1
   2  17   4 3072.47 326.535  12
   2  17   4 3077.65 311.051  11
  -2  17  -4 2947.57 275.954   9
  -2  17  -5 159.466 93.3257   9
  -2  17  -5 106.899 67.2701   8
   2  17   5 101.903 102.573  12
  -2  17  -6 185.477 81.6959   8
  -2  17  -6 255.433 114.135   9
   2  17   6 108.452 105.510  12
  -2  17  -7 1249.38 208.691   9
  -2  17  -7 1096.10 173.242   8
  -2 -17   8 92.1450 100.093   4
  -2 -17   8 101.645 158.836   6
  -2  17  -8 436.773 157.280   9
  -2 -17   9 139.641 154.563   6
   2  17   9 65.6274 98.2501   7
   2  17   9 55.4814 195.606  13
  -2 -17  10 314.735 176.935   6
   2  17  10 1019.35 326.215  13
  -2 -17  11 36.5144 162.653   6
  -2 -17  11-9.98039 103.945   3
   2  17  11 32.7900 141.667  13
  -2 -17  12 528.474 211.034   6
  -2 -17  12 361.183 154.534   3
   2  17  12 507.927 241.347  13
   2  17  13 536.208 226.852  13
  -2 -17  13 261.061 129.170   3
  -2 -17  13 72.5662 128.101   6
  -2 -17  14 80.7351 159.369   6
   2  17  14-48.3576 124.218  13
  -2 -17  14 100.200 85.4304   3
  -2 -17  15 175.964 133.182   6
  -2 -17  16 46.8960 74.6406   6
   2 -18  15 72.1717 96.9769   3
   2 -18  14 115.711 110.288   3
   2 -18  13 373.577 171.256   3
  -2  18  13 243.246 149.096  13
   2 -18  13 494.584 218.740   6
  -2  18  12 315.790 208.346  13
   2 -18  12 340.001 176.420   3
  -2  18  11 609.943 227.626   5
   2 -18  11 939.839 273.325   6
  -2  18  11 660.055 248.718  13
  -2  18  10 1704.67 339.456  13
  -2  18  10 1782.48 344.256   5
   2 -18  10 1410.55 348.252   6
  -2  18   9 512.461 187.627   5
  -2  18   9 273.334 135.182   7
   2 -18   9 332.323 124.755   4
   2 -18   9 152.245 153.354   6
  -2  18   9 435.256 207.229  13
  -2  18   9 237.983 175.662  12
   2 -18   8 5319.59 535.150   6
  -2  18   8 5437.50 574.327  12
  -2 -18  -8 4463.89 499.111   1
   2 -18   8 4817.59 445.818   4
  -2  18   8 5314.38 578.395  13
  -2  18   8 5397.93 586.368   5
   2 -18   7 2687.88 305.879   2
   2 -18   7 3520.52 372.200   4
   2 -18   7 3536.04 458.279   6
  -2  18   7 2714.17 427.458   5
  -2  18   7 2921.89 408.377  12
  -2  18   6-53.4940 124.805  12
  -2  18   5 1536.11 272.411  12
  -2  18   4 1277.47 242.316  12
  -2  18   4 1668.27 239.770  11
  -2  18   3 1101.63 192.806  11
  -2  18   2 2029.98 251.283  11
  -2 -18   0 4624.15 424.140   1
  -2  18   0 4303.86 309.009   9
  -2  18  -1 1113.91 173.330   9
  -2  18  -1 1111.10 172.719   8
  -2 -18   1 1008.56 210.785   1
  -2 -18   2 1725.20 248.672   1
  -2  18  -2 1768.73 210.970   8
  -2  18  -2 1803.10 214.904   9
   2  18   2 1628.54 230.016  11
  -2  18  -3 1159.92 181.701   9
  -2  18  -3 1009.98 165.550   8
   2  18   3 1180.06 201.999  11
  -2 -18   3 837.497 167.021   1
  -2  18  -4 1401.27 206.224   9
   2  18   4 1061.90 213.205  12
  -2  18  -4 1256.70 193.413   8
   2  18   4 1303.66 205.320  11
  -2  18  -5 1388.78 200.837   9
  -2  18  -5 1362.51 195.255   8
   2  18   5 1583.96 257.947  12
  -2  18  -6 91.2435 91.5078   9
  -2  18  -6 60.6935 62.9833   8
   2  18   6 94.7469 88.9469  12
  -2 -18   7 2748.34 298.338   4
  -2  18  -7 3301.25 330.322   9
  -2 -18   8 4367.13 389.283   4
  -2 -18   8 4782.02 540.020   6
  -2 -18   9 348.054 202.724   6
   2  18   9 340.069 150.581   7
  -2 -18  10 1851.35 354.914   6
   2  18  10 1930.42 436.822  13
  -2 -18  11 254.677 168.075   6
  -2 -18  11 501.083 177.253   3
  -2 -18  12 72.5687 177.614   6
  -2 -18  12 101.413 98.4545   3
   2  18  12 254.715 186.691  13
   2  18  13 434.086 206.394  13
  -2 -18  13 476.618 189.963   6
  -2 -18  13 161.546 102.446   3
   2  18  14-31.8317 128.586  13
  -2 -18  14 17.6380 131.206   6
  -2 -18  14 275.583 123.530   3
  -2 -18  15 8.37560 89.7295   6
  -2 -18  16-3.95926 82.4422   6
   2 -19  15 43.0684 78.8244   3
   2 -19  14 73.4688 95.0926   3
   2 -19  13 371.267 211.185   6
   2 -19  13 163.284 135.464   3
  -2  19  13 164.346 166.993  13
   2 -19  12 389.132 193.767   6
  -2  19  12 334.498 182.489  13
  -2  19  12 239.119 159.822   5
   2 -19  12 270.825 164.169   3
  -2  19  11 85.6796 121.229   5
   2 -19  11 47.7641 170.412   6
  -2  19  11 196.676 146.082  13
  -2  19  10 574.395 212.500   5
  -2  19  10 763.416 251.949  13
   2 -19  10 655.254 255.285   6
   2 -19   9 3666.33 483.224   6
  -2  19   9 3088.11 387.454   7
  -2  19   9 3949.95 518.707  13
  -2  19   9 3219.36 453.671   5
  -2  19   9 3355.50 452.856  12
   2 -19   9 3283.95 392.965   4
  -2  19   8 287.959 182.609   5
   2 -19   8 115.741 170.096   6
   2 -19   8 103.464 117.082   4
  -2  19   8 295.615 197.011  13
  -2 -19  -8 173.381 122.932   1
  -2  19   8 231.221 173.671  12
  -2  19   7 642.643 225.319   5
   2 -19   7 797.049 232.639   6
   2 -19   7 687.744 190.154   4
  -2  19   7 598.506 180.442  12
  -2 -19  -7 462.397 189.858   1
   2 -19   7 536.583 135.842   2
   2 -19   6 2361.73 318.378   4
   2 -19   6 1670.46 263.063   2
  -2  19   6 2299.52 369.292  12
  -2  19   5 4141.64 456.603  12
  -2  19   4 2757.64 368.670  12
  -2  19   4 2758.23 292.496  11
  -2  19   3 72.6545 112.703  11
  -2  19   2 479.214 130.275  11
  -2 -19  -1 2212.13 325.029   1
  -2 -19   0 843.470 210.570   1
  -2 -19   1 2005.65 296.217   1
  -2  19  -1 2214.66 236.849   9
  -2  19  -2 564.645 135.003   9
  -2 -19   2 420.269 136.027   1
   2  19   2 421.144 148.096  11
  -2  19  -2 364.442 120.131   8
  -2 -19   3 132.337 98.8830   1
  -2  19  -3 142.832 92.8658   9
   2  19   3 276.885 131.320  11
  -2  19  -3 138.426 84.2656   8
   2  19   4 2323.07 290.693  11
   2  19   4 2509.51 311.743  12
  -2  19  -4 2281.23 253.307   8
  -2  19  -4 2539.02 275.411   9
  -2  19  -5 3699.54 311.306   8
   2  19   5 3528.95 369.401  12
  -2  19  -5 4020.86 342.598   9
  -2  19  -6 2033.15 240.140   8
   2  19   6 2406.41 332.274  12
  -2  19  -6 2115.53 271.172   9
  -2  19  -7 939.256 197.180   9
  -2 -19   7 597.684 140.867   4
  -2 -19   8 59.9411 92.1663   4
   2  19   9 2982.03 398.428   7
  -2 -19   9 3058.84 419.314   6
   2  19  10 603.423 273.981  13
  -2 -19  10 558.234 231.143   6
  -2 -19  11-115.613 159.573   6
   2  19  11-109.469 199.476  13
  -2 -19  11 183.947 128.507   3
  -2 -19  12 310.946 200.587   6
   2  19  12 346.116 209.519  13
  -2 -19  12 381.344 146.904   3
  -2 -19  13 184.522 165.426   6
   2  19  13 142.496 153.094  13
  -2 -19  13 335.825 138.668   3
   2  19  14 175.559 128.824  13
  -2 -19  14 108.785 119.440   6
  -2 -19  14-28.6036 58.8762   3
  -2 -19  15-50.9343 83.8426   6
   2 -20  15 37.4937 71.7044   3
   2 -20  14-54.6733 114.596   3
  -2  20  13-1.13231 105.267  13
   2 -20  13-82.6978 125.457   3
  -2  20  12 82.9042 112.680   5
   2 -20  12-74.8430 142.885   3
   2 -20  12 107.572 205.729   6
  -2  20  12-6.89879 109.651  13
  -2  20  11 41.9013 111.135   5
   2 -20  11 144.199 138.171   6
  -2  20  11 24.0545 118.018  13
  -2  20  10 2163.57 389.334  13
  -2  20  10 1848.82 364.280   5
   2 -20  10 2261.24 398.801   6
   2 -20   9 6387.80 541.434   4
  -2  20   9 6769.23 674.678  13
   2 -20   9 6338.44 616.948   6
  -2  20   9 5567.60 609.832   5
   2 -20   8 791.353 197.313   4
  -2  20   8 917.350 270.827   5
  -2  20   8 919.569 284.177  12
  -2  20   8 776.833 283.719  13
   2 -20   8 800.281 267.821   6
  -2 -20  -8 614.742 225.945   1
  -2  20   7 655.004 226.448   5
  -2 -20  -7 310.742 173.550   1
   2 -20   7 44.2029 176.003   6
   2 -20   7 641.046 179.249   4
   2 -20   7 398.704 102.581   2
  -2  20   7 567.186 200.910  12
  -2  20   6 2623.64 389.493  12
   2 -20   6 1780.57 266.705   2
   2 -20   6 2240.03 306.239   4
  -2 -20  -6 2447.25 377.364   1
  -2  20   5 7397.77 627.858  12
  -2 -20  -5 7382.53 638.880   1
  -2 -20  -4 699.217 188.109   1
  -2  20   4 718.093 215.169  12
  -2  20   4 675.437 170.105  11
  -2 -20  -3 416.423 242.074   1
  -2  20   3 589.763 163.108  11
  -2 -20  -2 5335.50 519.618   1
  -2  20   2 5736.05 414.233  11
  -2 -20  -1 3058.55 398.405   1
  -2 -20   0 2722.73 372.103   1
  -2 -20   1 3188.82 377.720   1
  -2  20  -1 3409.61 299.556   9
  -2  20  -2 5551.78 386.848   8
   2  20   2 5894.00 428.909  11
  -2 -20   2 5293.74 473.739   1
  -2  20  -2 5467.65 385.427   9
  -2  20  -3 533.984 138.084   9
  -2  20  -3 624.729 142.528   8
  -2 -20   3 571.321 164.932   1
   2  20   3 234.328 99.8678  11
  -2  20  -4 791.426 155.663   8
   2  20   4 744.989 178.363  12
   2  20   4 572.422 137.682  11
  -2  20  -4 678.010 159.362   9
  -2  20  -5 7306.19 448.091   8
   2  20   5 6953.95 527.637  12
  -2  20  -5 7787.09 491.247   9
  -2  20  -6 2316.73 262.133   8
  -2 -20   6 1742.41 242.365   4
  -2 -20   6 2135.35 275.168   2
  -2  20  -6 2057.89 274.809   9
  -2 -20   7 345.388 118.790   4
  -2 -20   7 536.537 152.893   2
  -2 -20   8 583.148 166.333   4
  -2 -20   9 5733.24 585.162   6
  -2 -20  10 2322.19 383.035   6
   2  20  10 2441.87 482.232  13
   2  20  11 288.768 213.519  13
  -2 -20  11 209.707 191.586   6
  -2 -20  11 133.521 118.716   3
   2  20  12-77.6848 160.477  13
  -2 -20  12 298.352 174.904   6
  -2 -20  12-19.1977 72.8073   3
  -2 -20  13-112.208 125.956   6
  -2 -20  13 31.8765 82.2072   3
  -2 -20  14 33.1911 90.0658   6
  -2 -20  14 162.031 96.6222   3
   2  20  14 169.376 139.630  13
  -2 -20  15-88.5689 84.8814   6
   2 -21  15-54.9661 64.6379   3
   2 -21  14 220.400 134.026   3
  -2  21  13-141.328 137.348  13
   2 -21  13 90.9020 118.398   3
  -2  21  12-141.804 107.968   5
  -2  21  12 90.0105 127.382  13
   2 -21  12-163.167 167.777   3
  -2  21  11 75.4540 90.2972   5
  -2  21  11 278.535 191.360  13
   2 -21  11-71.5429 131.921   6
  -2  21  10 352.652 179.092   5
   2 -21  10 595.697 225.127   6
  -2  21  10 471.442 207.127  13
  -2  21   9 1941.33 373.011   5
   2 -21   9 2001.70 316.470   4
   2 -21   9 2089.96 370.905   6
  -2  21   9 2715.76 448.514  13
  -2 -21  -8 6786.81 662.053   1
   2 -21   8 6479.65 541.721   4
  -2  21   8 6493.31 654.746  13
   2 -21   8 5976.25 586.675   6
  -2  21   8 6290.17 651.153   5
  -2  21   8 6349.56 648.160  12
  -2  21   7 2235.36 396.164   5
   2 -21   7 2677.84 348.864   4
   2 -21   7 1494.82 346.338   6
  -2 -21  -7 2279.76 395.531   1
  -2  21   7 2117.64 368.305  12
   2 -21   7 2055.91 290.226   2
  -2  21   6 1934.21 345.315  12
   2 -21   6 1555.57 268.959   4
   2 -21   6 1266.95 239.717   2
  -2 -21  -6 1983.40 368.003   1
  -2 -21  -5 2517.79 397.633   1
  -2  21   5 2474.92 378.554  12
   2 -21   5 2383.77 308.109   2
  -2  21   4 1902.99 330.373  12
  -2 -21  -4 2138.11 347.780   1
  -2  21   4 2244.06 297.027  11
  -2  21   3 797.258 170.360  11
  -2 -21  -3 1123.12 257.574   1
  -2  21   2 1025.02 192.792  11
  -2 -21  -2 919.586 259.387   1
  -2 -21  -1 1129.99 260.226   1
  -2 -21   0 137.664 142.498   1
  -2 -21   1 1172.11 251.064   1
  -2 -21   2 913.922 228.899   1
   2  21   2 1052.06 218.303  11
  -2  21  -3 1270.23 216.012   9
  -2 -21   3 747.560 197.886   1
   2  21   3 1191.82 224.766  11
  -2  21  -4 1840.91 244.292   8
   2  21   4 2135.19 308.534  12
   2  21   4 2063.66 272.798  11
  -2  21  -4 2347.90 284.327   9
  -2  21  -5 2574.02 281.660   8
   2  21   5 2290.99 319.763  12
  -2 -21   5 2360.28 275.631   2
  -2  21  -6 1754.46 242.267   8
  -2 -21   6 1372.74 232.523   4
  -2 -21   6 1461.67 228.415   2
  -2 -21   7 1599.14 241.690   2
  -2 -21   7 2009.03 278.102   4
  -2 -21   8 5900.98 456.181   4
  -2 -21  10 536.120 249.114   6
   2  21  10 485.421 225.972  13
  -2 -21  11-146.951 179.850   6
  -2 -21  11-101.791 114.756   3
  -2 -21  12 188.719 170.572   6
   2  21  12 75.4541 151.147  13
  -2 -21  12 35.7656 72.2354   3
  -2 -21  13-196.272 145.040   6
  -2 -21  13 30.5851 72.4623   3
   2  21  14 362.016 184.018  13
  -2 -21  14 575.462 164.659   6
  -2 -21  14 374.994 113.777   3
  -2 -21  15 113.767 88.7862   6
   2 -22  15 75.6771 70.3021   3
   2 -22  14 241.872 120.207   3
  -2  22  13 141.225 139.373  13
   2 -22  13 83.7386 122.573   3
  -2  22  12 27.1551 103.427   5
  -2  22  12 46.6994 139.713  13
   2 -22  12-8.26139 145.600   3
  -2  22  11 140.306 141.347   5
  -2  22  11 310.447 151.952  13
  -2  22  10 132.264 136.192  13
  -2  22  10 269.852 150.750   5
  -2  22   9 941.634 280.595   5
   2 -22   9 767.036 259.515   6
   2 -22   9 712.553 200.620   4
  -2  22   9 990.057 278.632  13
  -2  22   8 3403.46 491.173   5
   2 -22   8 2794.19 361.407   4
   2 -22   8 2509.54 420.733   6
  -2 -22  -8 3681.96 514.153   1
  -2  22   8 2954.37 454.516  13
  -2 -22  -7 2633.53 433.962   1
   2 -22   7 2446.72 357.770   4
  -2  22   7 3155.84 471.953   5
   2 -22   7 2526.30 335.829   2
  -2  22   7 2831.65 433.929  12
   2 -22   6 2191.04 307.651   2
  -2 -22  -6 2356.62 406.177   1
   2 -22   6 1899.66 302.278   4
  -2  22   6 1450.64 303.626  12
   2 -22   5 664.300 172.069   2
  -2 -22  -5 407.537 158.534   1
  -2  22   5 651.771 212.908  12
   2 -22   4 270.574 158.270   2
  -2 -22  -4 248.446 165.974   1
  -2  22   4 233.444 153.475  12
  -2  22   4 173.299 132.735  11
  -2 -22  -3 195.481 176.372   1
  -2  22   3-64.1858 117.625  11
  -2 -22  -2 154.178 133.041   1
  -2  22   2 117.745 100.085  11
  -2 -22  -1 1139.59 256.804   1
  -2 -22   0 286.682 157.726   1
  -2 -22   1 1182.78 266.812   1
  -2 -22   2 161.737 102.105   1
   2  22   2 195.287 124.496  11
  -2 -22   3 14.6124 137.052   1
   2  22   3 371.559 160.810  11
   2  22   4 125.721 100.493  12
  -2 -22   4 217.227 114.627   2
   2  22   4 151.404 117.533  11
  -2 -22   5 408.960 147.981   4
  -2 -22   5 828.698 183.590   2
  -2 -22   6 1713.43 251.125   4
  -2 -22   6 2206.66 283.384   2
  -2 -22   7 2037.81 277.113   2
  -2 -22   7 1993.28 271.020   4
  -2 -22   8 2641.92 314.619   4
  -2 -22   8 3320.61 343.691   2
   2  22  10 31.2370 139.508  13
   2  22  11 364.560 215.832  13
  -2 -22  11 6.62007 95.0618   3
  -2 -22  11 40.4910 118.796   6
   2  22  11 194.592 167.306   5
   2  22  12 142.199 173.172  13
  -2 -22  12-16.8963 135.451   6
  -2 -22  12 97.1067 86.0907   3
  -2 -22  13-127.259 146.328   6
  -2 -22  13 187.244 105.831   3
   2  22  13-0.41378 123.036  13
   2  22  14 152.002 120.938  13
  -2 -22  14 178.133 83.3705   3
  -2 -22  14 12.3552 90.0675   6
   2 -23  15 22.6432 54.7951   3
   2 -23  14 648.012 150.784   3
  -2  23  13 189.632 126.826  13
   2 -23  13 77.3132 96.1263   3
  -2  23  12 317.779 144.818  13
  -2  23  12 273.577 131.815   5
  -2  23  11 130.920 157.631  13
  -2  23  11-97.9291 119.106   5
  -2  23  10 113.700 170.591   5
  -2  23  10 560.906 199.593  13
  -2  23   9 1555.41 343.904   5
  -2  23   9 1818.86 382.145  13
   2 -23   9 1256.17 263.692   4
   2 -23   8 637.661 198.494   4
  -2  23   8 667.980 213.893   5
  -2  23   8 778.055 254.584  13
   2 -23   7-126.217 165.652   4
  -2  23   7 335.269 181.008   5
  -2 -23  -7 36.2999 166.820   1
  -2  23   7 120.694 141.598  12
   2 -23   7 293.683 147.176   2
  -2  23   6 208.339 130.336   5
   2 -23   6 68.2963 121.240   4
  -2 -23  -6 274.887 173.754   1
  -2  23   6 401.130 170.118  12
   2 -23   6 340.568 158.719   2
  -2  23   5 4585.75 525.261  12
  -2 -23  -5 4823.67 572.929   1
   2 -23   5 4094.12 407.231   2
  -2 -23  -4 377.426 175.896   1
   2 -23   4 294.201 171.078   2
  -2  23   4 45.6163 133.745  11
  -2  23   4 150.842 118.271  12
   2 -23   3 2631.99 322.815   2
  -2 -23  -3 3237.70 462.393   1
  -2  23   3 2869.41 342.456  11
  -2 -23  -2 462.076 184.069   1
   2 -23   2 764.234 196.441   2
  -2  23   2 781.444 190.432  11
  -2 -23  -1 2086.50 353.519   1
  -2  23   1 1925.97 292.741  11
  -2 -23   0 186.159 131.891   1
  -2 -23   1 1551.36 305.481   1
   2  23   1 1845.63 282.642  11
  -2 -23   2 446.177 116.564   2
  -2 -23   2 658.115 208.656   1
   2  23   2 675.544 175.612  11
   2  23   3 2848.03 347.419  11
  -2 -23   3 2648.35 295.815   2
  -2 -23   4 254.116 104.047   2
   2  23   4-49.7780 162.525  11
   2  23   4 248.559 123.005  12
  -2 -23   5 3592.60 366.465   4
  -2 -23   5 3800.04 363.705   2
  -2 -23   6 134.224 100.312   4
  -2 -23   6 299.443 121.593   2
  -2 -23   7-23.5295 119.731   2
  -2 -23   7-42.5185 117.848   4
  -2 -23   8 347.261 102.299   4
  -2 -23   8 902.707 201.730   2
   2  23  10 70.1468 154.915  13
   2  23  11 86.5943 195.018  13
   2  23  11-138.901 116.397   5
  -2 -23  11 104.721 82.0500   3
  -2 -23  12 54.0218 129.857   6
  -2 -23  12-22.6581 74.2779   3
   2  23  12 216.304 179.832  13
   2  23  13-54.1354 125.571  13
  -2 -23  13 45.4751 73.3274   3
  -2 -23  13-70.7531 97.9457   6
  -2 -23  14 171.026 108.545   6
   2  23  14 519.415 186.996  13
   2 -24  14-42.0625 64.0078   3
   2 -24  13 211.802 102.551   3
  -2  24  12 1.50506 73.7883   5
   2 -24  12 107.722 117.985   3
  -2  24  12 215.272 154.982  13
  -2  24  11 319.587 157.570  13
  -2  24  11 225.753 145.956   5
  -2  24  10 215.860 176.688   5
  -2  24  10 373.075 191.549  13
  -2  24   9 702.723 248.860   5
  -2  24   9 810.465 243.300  13
   2 -24   9 555.686 195.842   4
  -2  24   8 639.152 248.283   5
   2 -24   8 352.770 149.761   4
  -2  24   8 674.963 259.584  13
  -2  24   7 1297.46 323.524   5
   2 -24   7 1047.14 248.557   4
   2 -24   7 860.942 183.887   2
  -2  24   6 2465.19 420.070   5
   2 -24   6 2042.30 317.455   4
  -2 -24  -6 1929.84 398.313   1
  -2  24   6 1769.03 344.941  12
   2 -24   6 1653.54 270.452   2
   2 -24   5 861.991 212.480   2
  -2 -24  -5 816.320 278.918   1
  -2  24   5 957.282 275.798  12
   2 -24   4 2076.80 300.518   2
  -2  24   4 2507.89 328.729  11
  -2 -24  -4 2370.14 408.923   1
  -2  24   4 2177.15 384.552  12
  -2 -24  -3 10366.2 825.709   1
  -2 -24  -3 9903.33 533.765   2
   2 -24   3 10087.7 631.412   2
  -2  24   3 11451.7 678.088  11
   2 -24   2 99.3932 104.660   2
  -2 -24  -2 438.035 236.507   1
  -2 -24  -2 401.508 142.089   2
  -2  24   2 450.815 129.843  11
  -2  24   1 358.839 154.418  11
  -2 -24  -1 364.146 179.953   1
   2 -24   1 262.935 138.676   2
  -2 -24  -1 216.416 97.3079   2
  -2 -24   0 3298.51 434.307   1
   2 -24   0 2894.90 328.301   2
  -2 -24   0 3537.51 335.031   2
  -2 -24   1 148.633 160.973   1
   2  24   1 234.418 149.447  11
  -2 -24   1 240.369 117.698   2
  -2 -24   2 302.083 151.146   1
  -2 -24   2 116.688 109.843   2
   2  24   3 11421.7 684.351  11
  -2 -24   3 9827.67 567.405   2
  -2 -24   4 2246.54 274.350   2
   2  24   4 1918.58 281.250  11
  -2 -24   5 1246.59 228.362   2
  -2 -24   5 605.776 172.432   4
  -2 -24   6 1962.27 270.388   2
  -2 -24   6 1841.48 256.797   4
  -2 -24   7 850.093 182.936   2
  -2 -24   7 1074.02 212.635   4
  -2 -24   8 313.521 115.095   4
  -2 -24   8 224.404 123.767   2
   2  24  10 625.356 237.036  13
   2  24  11 159.899 129.325   5
  -2 -24  11 34.4074 73.3611   3
   2  24  11 281.959 192.613  13
  -2 -24  12 86.3946 73.7370   3
   2  24  12-181.030 136.742  13
  -2 -24  13 112.284 77.8640   3
   2  24  13 89.6128 100.033  13
   2  24  14 208.171 130.955  13
   2 -25  14-25.6311 60.5668   3
   2 -25  13 109.550 83.6503   3
  -2  25  12-39.2649 94.2386   5
  -2  25  12 167.636 124.997  13
   2 -25  12-29.8029 83.6754   3
  -2  25  11 771.871 220.728   5
  -2  25  11 966.992 254.584  13
  -2  25  10 432.323 191.627  13
  -2  25  10 405.205 200.201   5
  -2  25   9 123.252 118.806   5
   2 -25   9 192.149 164.226   4
  -2  25   9 358.256 185.921  13
  -2  25   8 493.747 210.121   5
   2 -25   8 138.873 130.781   4
  -2  25   8 472.252 196.197  13
   2 -25   7 3190.53 392.799   4
  -2  25   7 3299.24 498.948   5
   2 -25   7 2593.37 317.991   2
   2 -25   6 641.555 185.148   2
  -2  25   6 523.303 226.169   5
   2 -25   6 882.391 222.483   4
  -2 -25  -6 1072.69 314.761   1
  -2  25   6 763.403 247.846  12
  -2  25   5 5916.40 619.626  12
   2 -25   5 5399.42 481.360   2
  -2 -25  -5 6352.18 686.381   1
   2 -25   5 7156.53 594.104   4
   2 -25   4 8872.27 611.909   2
  -2 -25  -4 10972.3 903.835   1
  -2  25   4 9505.12 772.917  12
  -2  25   4 10649.6 698.493  11
  -2 -25  -3 8754.98 519.075   2
  -2 -25  -3 9991.00 821.418   1
   2 -25   3 8663.31 598.747   2
  -2  25   3 9794.78 646.863  11
  -2 -25  -2 6828.53 463.627   2
  -2  25   2 7907.76 574.266  11
  -2 -25  -2 7454.02 720.406   1
   2 -25   2 6795.21 518.070   2
   2 -25   1 2558.72 314.780   2
  -2 -25  -1 2902.84 318.390   2
  -2  25   1 2943.72 352.583  11
  -2 -25  -1 2700.71 427.678   1
   2 -25   0 12.3716 97.6790   2
  -2 -25   0 152.204 108.174   2
  -2 -25   0 21.2981 171.159   1
   2 -25  -1 2217.33 287.436   2
  -2 -25   1 2743.99 415.917   1
   2  25   1 2753.13 345.671  11
  -2 -25   1 2480.02 294.334   2
   2  25   2 7921.49 576.452  11
  -2 -25   2 6890.49 487.176   2
  -2 -25   2 6662.72 634.903   1
   2  25   3 10178.3 666.531  11
  -2 -25   3 8227.22 535.754   2
   2  25   4 10435.6 688.194  11
  -2 -25   4 9666.08 591.190   2
  -2 -25   5 5192.34 447.281   4
  -2 -25   5 5945.09 469.761   2
  -2 -25   6 699.504 185.043   4
  -2 -25   6 539.039 142.888   2
  -2 -25   7 2890.69 329.292   4
  -2 -25   7 2986.80 344.178   2
  -2 -25   8 317.127 149.224   2
  -2 -25   8 302.519 132.927   4
   2  25   9 223.242 175.064  13
   2  25  10 496.929 210.491  13
   2  25  11 833.545 216.248   5
   2  25  11 1180.01 320.933  13
  -2 -25  11 605.949 163.503   3
  -2 -25  12 84.3497 77.2767   3
   2  25  12 311.084 185.277  13
   2  25  13 357.518 170.200  13
  -2 -25  13 70.4073 58.2582   3
   2  25  14 181.948 117.308  13
   2 -26  14 238.201 88.9832   3
   2 -26  13 398.949 137.696   3
  -2  26  12 110.943 107.483   5
  -2  26  12 281.764 126.902  13
   2 -26  12 30.0749 75.1102   3
  -2  26  11 399.320 180.990   5
  -2  26  11 244.010 153.801  13
  -2  26  10 135.003 150.590   5
  -2  26  10 183.269 145.851  13
  -2  26   9-199.406 136.554  13
  -2  26   9-41.4392 104.295   5
  -2  26   8 1221.46 305.983   5
   2 -26   8 969.852 236.341   4
  -2  26   8 1085.06 301.275  13
  -2  26   7 156.375 138.115   5
   2 -26   7 379.161 181.001   4
  -2  26   7 445.149 214.448  13
   2 -26   6 724.471 205.903   2
  -2  26   6 752.338 256.734   5
   2 -26   6 518.318 181.174   4
  -2 -26  -5 3780.84 551.344   1
   2 -26   5 3335.98 413.318   4
  -2  26   5 3409.68 480.207  12
  -2  26   5 3791.11 514.549   5
   2 -26   5 3131.33 391.500   2
  -2  26   4 18295.8 1086.14  12
  -2 -26  -4 19744.1 1210.80   1
  -2  26   4 21014.2 984.565  11
   2 -26   4 16894.5 845.457   2
  -2  26   3 4527.54 462.522  11
  -2 -26  -3 4309.64 565.735   1
   2 -26   3 3432.20 385.378   2
  -2 -26  -3 3099.10 318.487   2
  -2 -26  -2 430.637 249.301   1
   2 -26   2 688.217 185.549   2
  -2 -26  -2 511.735 157.814   2
  -2  26   2 326.542 159.026  11
  -2 -26  -1 386.074 180.145   1
  -2 -26  -1 313.192 134.534   2
   2 -26   1 407.487 168.302   2
  -2  26   1 233.369 136.960  11
  -2 -26   0 1335.74 228.427   2
  -2 -26   0 1769.91 342.382   1
   2 -26   0 1216.85 228.010   2
   2 -26  -1 326.516 164.398   2
   2  26   1 262.483 147.673  11
  -2 -26   1 431.075 186.289   1
  -2 -26   1 210.854 115.542   2
   2  26   2 544.361 175.741  11
  -2 -26   2 568.948 161.203   2
  -2 -26   3 3275.64 356.525   2
   2  26   3 3551.00 422.002  11
   2  26   4 21141.8 999.476  11
  -2 -26   4 18553.8 831.858   2
  -2 -26   5 2573.21 324.531   4
  -2 -26   5 3686.08 378.947   2
  -2 -26   6 499.172 168.144   2
  -2 -26   6 591.369 177.861   4
  -2 -26   7 356.189 129.055   2
  -2 -26   7 129.548 129.586   4
  -2 -26   8 932.612 206.354   2
  -2 -26   8 1225.90 223.315   4
   2  26   9 137.301 152.786  13
   2  26  10 247.613 153.209   5
   2  26  10 18.5606 166.473  13
   2  26  11 102.813 84.1963   5
  -2 -26  11 17.6574 81.2131   3
   2  26  11 177.955 164.532  13
   2  26  12 228.383 169.158  13
  -2 -26  12 104.267 74.4435   3
   2  26  13 633.910 208.136  13
   2  26  14 438.809 134.972  13
   2 -27  14 117.131 62.8708   3
   2 -27  13 146.583 101.005   3
  -2  27  12 679.916 163.461   5
  -2  27  12 378.571 144.572  13
  -2  27  11 183.537 126.227   5
  -2  27  11 159.304 148.268  13
  -2  27  10 311.443 153.319  13
  -2  27  10-8.13290 83.8964   5
  -2  27   9 82.2464 105.524   5
  -2  27   9 315.252 161.867  13
  -2  27   8 1447.97 323.773   5
   2 -27   8 1757.25 293.602   4
  -2  27   8 1943.39 362.978  13
  -2  27   7 1120.25 295.384   5
   2 -27   7 1012.19 253.509   4
  -2  27   7 1366.81 299.811  13
  -2  27   6 515.036 242.054   5
   2 -27   6 459.512 185.127   4
   2 -27   6 386.605 188.478   2
  -2  27   5 1239.00 305.831   5
   2 -27   5 826.515 224.860   4
   2 -27   5 925.041 205.702   2
  -2  27   4 3245.31 468.567  12
   2 -27   4 2935.36 362.653   2
  -2  27   4 3833.61 434.885  11
  -2 -27  -3 856.444 259.450   1
  -2 -27  -3 503.052 133.840   2
   2 -27   3 572.301 184.579   2
  -2  27   3 813.690 211.054  11
  -2 -27  -2 285.004 131.679   2
  -2  27   2 177.226 142.999  11
   2 -27   2 230.512 137.548   2
  -2 -27  -2 373.175 221.377   1
   2 -27   1-0.57944 98.5602   2
  -2 -27  -1-122.066 182.808   1
  -2 -27  -1 48.4863 110.942   2
  -2  27   1-131.470 140.397  11
   2 -27   0-144.857 120.493   2
  -2 -27   0 98.7536 113.993   2
  -2 -27   0 71.3764 149.090   1
  -2  27   0 82.5147 140.462  11
   2  27   0-123.107 122.516  11
  -2 -27   1-259.920 224.031   1
  -2 -27   1-58.7621 93.7523   2
   2 -27  -1 88.7983 111.447   2
   2  27   1 94.5862 142.844  11
   2 -27  -2 212.262 126.863   2
  -2 -27   2 170.404 97.6400   2
   2  27   2 286.211 131.637  11
  -2 -27   3 744.213 173.862   2
   2  27   3 883.368 206.771  11
   2  27   4 3789.86 441.517  11
  -2 -27   4 2831.48 338.643   2
  -2 -27   5 1447.78 250.347   2
  -2 -27   5 1330.60 239.158   4
  -2 -27   6 577.485 168.935   2
  -2 -27   6 585.669 177.261   4
  -2 -27   7 798.278 202.239   2
  -2 -27   7 1142.54 231.873   4
  -2 -27   8 1176.32 228.335   2
  -2 -27   9 127.278 102.200   2
   2  27   9 44.4238 149.468  13
   2  27  10 25.6715 97.6534   5
   2  27  10 212.404 179.957  13
   2  27  11 67.7498 123.380   5
  -2 -27  11 177.239 96.2879   3
   2  27  11 217.350 149.217  13
   2  27  12-82.5525 114.106  13
  -2 -27  12 372.357 121.539   3
   2  27  13 362.516 145.970  13
   2 -28  13-65.8661 70.0247   3
  -2  28  12-39.7930 85.9370  13
   2 -28  12 35.8526 67.3433   3
  -2  28  12 201.543 110.134   5
  -2  28  11 1169.11 241.388   5
  -2  28  11 968.143 228.678  13
  -2  28  10 228.091 157.980   5
  -2  28  10 317.692 158.550  13
  -2  28   9 77.9664 117.220  13
  -2  28   9 114.059 124.759   5
   2 -28   8 925.720 242.422   4
  -2  28   8 493.425 184.884  13
  -2  28   8 736.722 245.306   5
   2 -28   7 150.973 151.727   4
  -2  28   7 41.2086 123.800   5
  -2  28   6 572.397 215.202   5
   2 -28   6 827.818 230.282   4
   2 -28   6 549.805 182.918   2
   2 -28   5 124.394 154.217   2
  -2  28   5 181.204 159.382   5
   2 -28   5 12.4959 115.807   4
  -2  28   4 650.159 246.760   5
   2 -28   4 912.410 215.634   2
  -2 -28  -3 385.603 151.844   2
   2 -28   3 235.646 137.731   2
   2 -28   2 521.722 179.792   2
  -2 -28  -2 688.162 175.178   2
  -2 -28  -2 563.903 251.096   1
  -2  28   2 835.036 224.789  11
   2 -28   1 1347.64 250.579   2
  -2 -28  -1 1291.63 218.278   2
  -2 -28  -1 1977.76 394.355   1
  -2  28   1 1665.24 297.602  11
  -2  28   0 207.460 147.902  11
   2 -28   0 435.983 170.840   2
  -2 -28   0 449.488 207.005   1
  -2 -28   0 408.488 160.032   2
   2  28   0 470.544 197.868  11
   2 -28  -1 1011.57 216.867   2
  -2 -28   1 1227.72 240.494   2
   2  28   1 1675.61 282.258  11
   2 -28  -2 494.690 148.774   2
  -2 -28   2 442.103 144.998   2
   2  28   2 562.790 217.925  11
  -2 -28   3 275.127 131.111   2
   2  28   3 531.380 192.390  11
  -2 -28   4 1029.95 225.773   2
  -2 -28   4 610.512 177.189   4
  -2 -28   5-13.3998 124.741   2
  -2 -28   5-120.758 140.799   4
  -2 -28   6 693.486 188.157   4
  -2 -28   6 612.736 182.175   2
  -2 -28   7-111.212 111.410   2
  -2 -28   7-52.5996 90.7558   4
  -2 -28   8 376.677 145.235   2
   2  28   9 149.276 148.142  13
  -2 -28   9 101.448 90.7505   2
   2  28  10 241.742 157.421   5
   2  28  10 573.853 237.935  13
   2  28  11 1272.13 284.103  13
   2  28  11 969.448 220.452   5
  -2 -28  11 572.306 132.227   3
   2  28  12 119.352 123.087  13
   2  28  13 274.982 119.309  13
   2 -29  13 95.9618 55.3241   3
  -2  29  12 6.74594 53.8796   5
   2 -29  12-60.2288 67.8846   3
  -2  29  11 30.4454 90.6795  13
  -2  29  11-77.1827 71.4830   5
  -2  29  10-116.493 109.193  13
  -2  29  10-46.5181 105.542   5
  -2  29   9 214.437 148.298  13
  -2  29   9 98.5785 119.607   5
  -2  29   8 235.463 159.432   5
   2 -29   8 168.629 114.435   4
  -2  29   7 356.827 197.810   5
   2 -29   7 519.536 183.753   4
  -2  29   7 361.657 164.391  13
  -2  29   6 249.361 163.536   5
   2 -29   6 443.825 176.702   4
   2 -29   6 226.457 148.333   2
  -2  29   5 544.807 223.083   5
   2 -29   5 685.956 192.300   4
   2 -29   5 327.641 162.896   2
   2 -29   4 563.997 200.402   2
  -2  29   4 109.983 120.721   5
  -2  29   3 5.36197 138.716   5
  -2 -29  -3 194.953 110.701   2
   2 -29   3 262.552 153.676   2
  -2 -29  -2 185.668 111.782   2
   2 -29   2 112.208 121.790   2
  -2 -29  -1 262.269 145.331   2
   2 -29   1 9.54567 144.225   2
   2 -29   0 1788.36 284.597   2
  -2 -29   0 2124.92 306.922   2
   2 -29  -1 449.533 181.640   2
  -2 -29   1 285.429 137.698   2
  -2 -29   2 206.642 134.552   2
   2 -29  -2 251.404 114.555   2
  -2 -29   3 48.1068 124.147   2
  -2 -29   4 205.844 141.908   2
  -2 -29   4 424.185 158.741   4
  -2 -29   5 537.099 163.959   2
  -2 -29   5 813.823 192.517   4
  -2 -29   6 117.294 97.6995   4
  -2 -29   6 293.149 145.772   2
  -2 -29   7 172.106 125.817   2
  -2 -29   7 437.402 153.850   4
  -2 -29   8 200.973 132.641   2
   2  29   9 81.3387 156.222  13
  -2 -29   9 140.373 208.977   2
   2  29  10 28.6050 83.2584   5
   2  29  10-21.9269 134.569  13
   2  29  11 95.7186 96.1137   5
   2  29  11-30.9606 103.316  13
  -2 -29  11 131.791 91.9080   3
   2  29  12-92.0716 92.4718  13
   2  29  13-59.7865 79.2765  13
  -2  30  12 151.906 79.0339   5
   2 -30  12 224.322 86.4356   3
  -2  30  11 160.480 99.8053   5
  -2  30  10 15.9514 105.507   5
  -2  30   9 124.546 118.633  13
  -2  30   9-28.6582 89.0753   5
  -2  30   8 77.5948 151.918   5
   2 -30   8-64.6953 109.602   4
  -2  30   8-14.2732 111.384  13
   2 -30   7 137.397 116.932   4
  -2  30   7 26.5211 124.804  13
  -2  30   7 67.7113 97.4680   5
  -2  30   6 145.281 166.540   5
   2 -30   6 310.583 155.119   4
   2 -30   5-202.009 143.689   2
  -2  30   5 149.172 147.488   5
   2 -30   5 110.065 115.022   4
   2 -30   4 1321.38 266.684   2
  -2  30   4 1022.33 285.494   5
   2 -30   3 3024.39 375.623   2
  -2  30   3 3014.90 463.577   5
  -2 -30  -3 3696.93 372.513   2
   2 -30   2 1016.05 229.764   2
  -2  30   2 733.115 255.192   5
  -2 -30  -2 1302.30 248.225   2
   2 -30   1 386.970 158.264   2
  -2  30   1 327.088 147.504   5
  -2 -30  -1 318.162 140.645   2
  -2 -30   0-128.276 146.114   2
   2 -30   0-6.62246 98.8885   2
  -2 -30   1 404.617 175.737   2
   2 -30  -1 64.0966 100.419   2
   2 -30  -2 728.725 180.589   2
  -2 -30   2 1126.16 224.807   2
  -2 -30   3 3631.04 401.063   2
  -2 -30   4 1234.55 237.342   2
  -2 -30   4 992.214 218.553   4
  -2 -30   5 0.86206 115.719   2
  -2 -30   5 81.5086 130.005   4
  -2 -30   6 299.169 148.287   2
  -2 -30   6-32.2149 110.197   4
  -2 -30   7 86.0545 109.795   2
  -2 -30   7-7.47817 84.3955   4
  -2 -30   8-50.5314 110.190   2
   2  30   9-67.6416 117.200   5
   2  30   9-110.991 116.658  13
  -2 -30   9 100.715 77.4729   2
   2  30  10 125.076 116.842   5
   2  30  10 169.946 144.621  13
  -2 -30  10 40.7554 58.4776   3
   2  30  11 170.258 90.3939   5
   2  30  11-30.5890 114.878  13
   2  30  12 406.242 132.367  13
   2 -31  12 68.5402 60.3894   3
  -2  31  11 213.944 107.263   5
   2 -31  11 162.179 90.9893   3
  -2  31  10 292.981 133.450   5
  -2  31   9 857.216 230.076   5
   2 -31   8 131.248 120.791   4
  -2  31   8 182.875 134.998   5
  -2  31   7 233.041 186.012   5
   2 -31   7 241.342 143.309   4
  -2  31   6 755.671 265.985   5
   2 -31   6 666.110 184.048   4
  -2  31   5 743.021 243.559   5
   2 -31   5 599.728 183.575   2
   2 -31   5 1216.28 244.678   4
  -2  31   4 250.191 157.064   5
   2 -31   4 264.896 185.910   4
   2 -31   4 23.4307 128.439   2
   2 -31   3 1221.70 253.561   2
  -2  31   3 1092.07 300.146   5
  -2 -31  -3 1013.36 208.630   2
   2 -31   2-6.96887 122.769   2
  -2 -31  -2 471.568 164.104   2
  -2  31   2 170.000 171.676   5
   2 -31   1 2065.10 308.359   2
  -2  31   1 1901.91 353.751   5
  -2 -31  -1 2428.01 317.835   2
   2 -31   0 1012.27 219.331   2
  -2 -31   0 1234.16 240.146   2
  -2 -31   1 2374.51 317.898   2
   2 -31  -1 1576.20 267.466   2
  -2 -31   2-4.43468 113.815   2
   2 -31  -2 93.5705 93.3537   2
  -2 -31   3 985.568 215.428   2
  -2 -31   4 129.136 109.466   2
  -2 -31   4 145.451 137.198   4
  -2 -31   5 975.474 230.058   2
  -2 -31   5 879.369 204.909   4
  -2 -31   6 829.164 187.025   2
  -2 -31   6 539.474 161.132   4
  -2 -31   7 166.840 114.882   2
  -2 -31   7 175.302 135.013   4
  -2 -31   8-33.9034 78.1369   2
   2  31   9 801.662 214.719   5
   2  31   9 810.220 244.861  13
   2  31  10 190.910 142.692  13
   2  31  10 350.763 137.190   5
  -2 -31  10 44.1123 61.9515   3
   2  31  11 229.648 85.4844   5
   2  31  11 204.091 104.543  13
   2  31  12 144.673 95.0155  13
  -2  32  11 627.279 140.930   5
   2 -32  11 102.578 82.3009   3
  -2  32  10 150.506 105.681   5
  -2  32   9 300.675 135.773   5
  -2  32   8 126.718 137.034   5
   2 -32   8 97.2342 118.901   4
  -2  32   7-15.7495 113.160   5
   2 -32   7 159.911 104.201   4
  -2  32   6 49.0147 116.356   5
   2 -32   6 112.481 122.000   4
  -2  32   5 130.201 135.551   5
   2 -32   5 23.4085 110.614   4
  -2  32   4-32.1436 106.953   5
   2 -32   4 194.890 158.738   4
   2 -32   4 229.668 163.555   2
   2 -32   3 122.509 119.540   2
  -2  32   3 143.314 135.778   5
  -2 -32  -3-10.8837 94.0521   2
  -2  32   2 406.955 179.146   5
  -2 -32  -2 152.943 91.0069   2
   2 -32   2 137.257 120.590   2
   2 -32   1 75.7381 118.959   2
  -2  32   1 176.074 158.378   5
  -2 -32  -1 300.582 153.108   2
   2 -32   0 1916.87 294.893   2
  -2 -32   0 2690.25 333.282   2
   2 -32  -1 231.710 115.816   2
  -2 -32   1 176.176 115.581   2
  -2 -32   2-120.122 145.162   2
   2 -32  -2 212.080 94.8188   2
  -2 -32   3 29.6523 127.026   2
  -2 -32   3 127.111 109.959   4
  -2 -32   4-125.370 138.631   2
  -2 -32   4 24.2937 85.4942   4
  -2 -32   5-18.9001 100.468   4
  -2 -32   5 243.195 105.814   2
  -2 -32   6 6.65674 93.2422   2
  -2 -32   6-85.4251 88.1534   4
  -2 -32   7 173.959 125.573   2
   2  32   8-188.337 115.471  13
  -2 -32   8 82.8025 87.5932   2
   2  32   9 467.059 189.027  13
   2  32   9 358.580 150.700   5
   2  32  10 45.7126 80.2508   5
   2  32  10 113.964 107.534  13
   2  32  11 300.515 91.1616   5
   2  32  11 832.805 197.252  13
  -2  33  11 168.314 85.8834   5
   2 -33  11-73.1950 64.3905   3
  -2  33  10 296.489 117.241   5
  -2  33   9 115.161 76.0843   5
  -2  33   8 183.431 120.377   5
  -2  33   7 122.527 136.383   5
   2 -33   7 161.610 106.375   4
  -2  33   6 132.383 132.169   5
   2 -33   6 84.5824 137.337   4
  -2  33   5 128.781 137.651   5
   2 -33   5-68.9482 114.403   4
  -2  33   4 202.952 159.060   5
   2 -33   4 527.172 178.751   4
  -2  33   3 326.944 191.717   5
  -2 -33  -3 92.3073 91.2315   2
   2 -33   3 119.300 124.777   2
   2 -33   2 409.354 162.819   2
  -2  33   2 334.226 159.721   5
  -2 -33  -2 277.094 130.442   2
   2 -33   1 26.0743 119.204   2
  -2  33   1 149.209 112.459   5
  -2 -33  -1-152.152 121.121   2
   2 -33   0 637.311 189.105   2
  -2 -33   0 1168.46 220.145   2
  -2 -33   1-15.4711 140.443   2
   2 -33  -1 49.6289 90.6492   2
  -2 -33   2 38.0923 148.546   2
  -2 -33   3 84.5205 121.341   4
  -2 -33   3 80.1112 114.320   2
  -2 -33   4 479.513 149.016   2
  -2 -33   4 838.166 180.120   4
  -2 -33   5-36.1398 95.6098   2
  -2 -33   5-0.45373 117.414   4
  -2 -33   6 56.1106 130.902   2
  -2 -33   6-178.071 104.764   4
  -2 -33   7 69.9212 116.508   2
   2  33   8 191.160 135.985   5
  -2 -33   8 3.50273 84.0943   2
   2  33   9 194.032 120.931   5
   2  33   9 82.3685 97.1330  13
   2  33  10 307.168 120.698   5
   2  33  10 272.471 137.411  13
   2  33  11 228.403 105.386  13
  -2  34  10 230.481 99.3384   5
  -2  34   9 825.642 201.629   5
  -2  34   8 947.230 211.578   5
   2 -34   7 42.4211 93.4990   4
  -2  34   7 69.7036 113.386   5
  -2  34   6-21.9941 118.005   5
   2 -34   6 109.741 114.095   4
  -2  34   5 139.474 136.190   5
   2 -34   5 211.492 125.256   4
  -2  34   4 18.9613 81.4781   5
   2 -34   4 128.984 155.713   4
  -2 -34  -3 127.778 98.6211   2
  -2  34   3 31.3663 88.9321   5
   2 -34   3 136.537 102.074   2
  -2 -34  -2-63.6578 136.137   2
  -2  34   2 59.9361 108.364   5
   2 -34   2 220.325 139.125   2
  -2  34   1-83.5449 110.489   5
  -2 -34  -1 162.066 96.3719   2
   2 -34   1 153.671 126.558   2
  -2 -34   0 520.502 136.521   2
   2 -34   0 360.190 139.128   2
  -2 -34   1-104.572 135.996   2
   2 -34  -1-145.582 122.880   2
  -2 -34   2 8.64215 133.800   2
  -2 -34   3 237.522 138.323   2
  -2 -34   3-5.35565 102.059   4
  -2 -34   4 69.7839 113.394   2
  -2 -34   4 146.484 88.0771   4
  -2 -34   5 82.2382 80.4002   4
  -2 -34   5 174.383 105.643   2
  -2 -34   6 102.377 80.8527   4
  -2 -34   6 104.450 87.9081   2
  -2 -34   7 131.412 111.304   2
   2  34   8 1204.76 250.090   5
   2  34   8 802.361 220.240  13
   2  34   9 681.300 186.830  13
   2  34   9 674.877 171.945   5
   2  34  10 132.533 90.3240   5
   2  34  10 321.641 121.875  13
   2 -35  10 1.98391 50.0144   3
  -2  35  10 305.423 94.0888   5
  -2  35   9 645.557 156.145   5
  -2  35   8 18.8424 69.1335   5
   2 -35   7 162.711 110.480   4
  -2  35   7 103.163 95.6177   5
  -2  35   6 70.8649 125.656   5
   2 -35   6 43.1240 97.2335   4
  -2  35   5 634.931 203.167   5
   2 -35   5 583.969 160.436   4
  -2  35   4-238.084 129.089   5
   2 -35   4 54.5528 108.289   4
  -2  35   3 395.749 182.948   5
   2 -35   3 771.981 208.841   4
  -2 -35  -3 567.452 160.557   2
  -2  35   2 470.356 174.533   5
  -2 -35  -2 379.256 143.542   2
  -2 -35  -1 131.638 94.1564   2
  -2 -35   0-80.6273 113.413   2
  -2 -35   1 230.046 119.801   2
  -2 -35   2 413.594 152.001   2
  -2 -35   2 45.2720 85.7893   4
  -2 -35   3 438.049 142.575   4
  -2 -35   3 828.447 188.125   2
  -2 -35   4-82.4013 83.2239   4
  -2 -35   4-127.205 137.968   2
  -2 -35   5 525.810 131.088   4
  -2 -35   5 680.025 168.718   2
  -2 -35   6 167.782 101.096   2
   2  35   7 147.702 117.209   5
  -2 -35   7 24.8383 69.1854   2
   2  35   7 115.544 118.594  13
   2  35   8-13.4829 79.7575   5
   2  35   8 122.334 127.417  13
   2  35   9 697.661 155.935   5
   2  35   9 615.133 162.695  13
   2  35  10 194.745 101.626  13
  -2  36   9 2383.45 249.006   5
  -2  36   8 607.506 156.136   5
  -2  36   7 510.476 150.544   5
  -2  36   6 265.599 126.422   5
   2 -36   6 344.212 121.078   4
   2 -36   5 297.182 139.056   4
  -2  36   5 106.932 95.3615   5
  -2  36   4 23.9227 77.8114   5
   2 -36   4 215.421 106.163   4
   2 -36   3 103.793 130.408   4
  -2  36   3 227.540 128.269   5
  -2 -36  -3 146.931 103.484   2
  -2 -36  -2 663.206 175.213   2
  -2  36   2 532.335 168.310   5
  -2 -36  -1 165.835 113.589   2
  -2 -36   0 112.587 122.173   2
  -2 -36   1 230.476 117.594   2
  -2 -36   2 622.308 178.934   2
  -2 -36   2 119.690 98.7515   4
  -2 -36   3 357.062 153.884   2
  -2 -36   3 348.461 129.559   4
  -2 -36   4 111.224 72.0264   4
  -2 -36   4-91.3824 111.937   2
  -2 -36   5 317.545 125.852   2
  -2 -36   6 305.922 108.319   2
   2  36   6 400.447 162.556   5
   2  36   7 411.096 156.614  13
   2  36   7 354.767 146.637   5
  -2 -36   7 511.558 119.537   2
   2  36   8 683.072 160.913   5
   2  36   8 554.342 166.120  13
   2  36   9 2711.79 311.566  13
   2  36   9 1714.27 213.056   5
  -2  37   8 285.277 106.860   5
  -2  37   7 100.674 82.1000   5
   2 -37   6 24.7654 80.3236   4
  -2  37   6 92.7910 77.7029   5
   2 -37   5 70.9194 84.4886   4
  -2  37   5 15.4209 75.7421   5
   2 -37   4 287.031 120.341   4
  -2  37   4 159.697 137.124   5
  -2  37   3 66.6626 80.3359   5
   2 -37   3 67.1234 107.448   4
  -2  37   2 31.3565 81.4926   5
   2 -37   2 214.740 136.717   4
  -2 -37  -2 90.4385 78.9284   2
  -2 -37  -1 61.1060 91.1346   2
  -2 -37   0 745.072 170.959   2
  -2 -37   1 150.964 96.1164   4
  -2 -37   1 78.6872 93.7192   2
  -2 -37   2 140.113 112.768   2
  -2 -37   2-39.7050 80.2569   4
  -2 -37   3 95.8930 97.5725   4
  -2 -37   3 57.9157 83.6620   2
  -2 -37   4 72.4773 90.6393   2
   2  37   5 296.325 147.009   5
  -2 -37   5 308.773 118.617   2
   2  37   6 202.844 112.485   5
  -2 -37   6 129.023 106.696   2
   2  37   7 216.178 119.845  13
   2  37   7 45.7690 69.4530   5
   2  37   8 382.079 120.245   5
   2  37   8 627.675 158.833  13
  -2  38   7 159.094 88.7734   5
   2 -38   6 62.1367 77.4788   4
  -2  38   6-21.3835 66.5802   5
  -2  38   5-39.4709 56.9427   5
   2 -38   5-4.47474 67.5256   4
  -2  38   4 95.5672 80.4692   5
   2 -38   4 280.552 125.076   4
   2 -38   3 266.493 115.547   4
  -2  38   3-116.933 97.8503   5
  -2 -38  -2-58.1590 75.1163   2
   2 -38   2-9.41463 97.0914   4
  -2 -38  -1 25.2386 94.7664   2
  -2 -38   0 55.2734 104.098   4
  -2 -38   0-40.2555 78.9163   2
  -2 -38   1 8.39277 90.7033   2
  -2 -38   1 10.2371 81.6429   4
  -2 -38   2 39.2112 77.9703   2
  -2 -38   3 121.338 105.852   2
   2  38   4 130.028 95.0473   5
  -2 -38   4 70.4599 85.8200   2
  -2 -38   5-2.45566 66.7071   2
   2  38   5-32.0979 82.4309   5
   2  38   6 10.4609 60.6548   5
   2  38   6-233.904 123.837  13
   2  38   7 83.4851 70.0426   5
   2  38   7 103.010 77.5780  13
  -2  39   6 52.3230 56.8032   5
  -2  39   5 313.435 99.7066   5
   2 -39   5 197.298 88.8385   4
  -2  39   4-33.7290 84.6178   5
   2 -39   4 24.7541 65.8425   4
  -2  39   3 48.9060 79.9250   5
   2 -39   3 283.061 111.401   4
  -2 -39  -2-14.2023 73.1250   2
   2 -39   2 35.3323 91.2722   4
  -2 -39  -1 392.552 117.150   2
   2 -39   1 246.533 116.834   4
  -2 -39   0 71.3622 82.2711   2
  -2 -39   1 416.659 122.546   2
   2  39   1 171.669 121.159   5
   2  39   2 50.1643 83.4915   5
  -2 -39   2 111.065 70.9751   2
   2  39   3 106.314 70.9561   5
  -2 -39   3-28.0155 69.6735   2
  -2 -39   4 10.6129 71.6269   2
   2  39   4 63.3338 80.1622   5
   2  39   5 355.278 114.366   5
  -2 -39   5 172.293 81.8069   2
   2  39   6-2.72415 65.8230   5
   2  39   6 57.1871 88.0734  13
   2 -40   5-43.5729 61.8964   4
   2 -40   4-30.0165 67.9675   4
   2 -40   3 30.1017 75.8779   4
   2 -40   2 94.2356 80.7201   4
  -2 -40  -1 340.254 88.7526   2
   2 -40   1 206.063 99.4950   4
  -2 -40   0 7.87886 57.4104   2
   2 -40   0 14.0623 68.6373   4
  -2 -40   1 96.2470 65.5957   2
   2  40   2 97.0889 99.8214   5
  -2 -40   2 231.641 88.2021   2
  -2 -40   3 32.0536 72.9283   2
   2  40   3 13.6596 60.8218   5
   2  40   4 75.2192 76.1953   5
  -2 -40   4-30.4006 63.4732   2
   2  40   5 71.0168 71.8482  13
   2  40   5 200.352 83.9008   5
   2 -41   3-23.7029 54.6987   4
   2 -41   2 80.6174 67.5936   4
   2 -41   1-70.2424 71.0863   4
   2 -41   0-55.3097 69.4635   4
  -2 -41   0 151.445 67.6976   2
   2 -41  -1 90.2687 67.1863   4
  -2 -41   1-57.6866 50.3663   2
   2 -41  -2 80.2597 70.5406   4
  -2 -41   2 25.7903 58.1058   2
  -3   0   0-6.89006 50.6309   8
  -3   0   0 13.1278 32.1153  12
  -3   0   1 9732.03 271.890  12
  -3   0   1 10642.6 265.170   8
  -3   0  -1 10539.2 323.008   8
  -3   0   2 7278.69 186.295   7
   3   0   2 7328.19 189.349   7
  -3   0   2 7022.46 281.037  12
  -3   0   2 6951.82 179.208   8
  -3   0   3 11521.0 190.143   8
   3   0   3 12364.9 312.720   7
  -3   0   3 12005.2 301.516   7
  -3   0   3 11690.3 416.235  12
  -3   0   4 335.693 65.2633   7
  -3   0   4 393.296 101.701  10
   3   0   4 213.182 43.8255   7
   3   0   5-21.1551 64.7575   7
  -3   0   5 90.3877 83.4631  10
  -3   0   5-3.10925 71.1617   7
  -3   0   6 7964.09 365.172   7
   3   0   6 7737.32 369.187   7
  -3   0  -6 7938.90 403.847   8
   3   0   7 10128.0 464.585   7
  -3   0   7 10470.2 461.297   7
  -3   0  -7 9850.17 479.839   8
  -3   0  -8 2711.07 268.324   8
   3   0   8 2900.24 268.067   7
  -3   0   8 2865.32 256.219   7
  -3   0   9 282.557 169.433   7
   3   0   9 524.109 182.484   7
  -3   0  -9 231.721 123.383   8
  -3   0 -10 313.227 133.226   8
  -3   0  10 2230.31 440.282   6
   3   0  10 2162.68 411.298   6
   3   0  10 345.126 207.602  13
   3   0  10 381.542 186.873   3
  -3   0  11 59.9687 138.882   6
   3   0  11-14.5382 133.369   3
   3   0  11 315.078 181.209   6
   3   0  12 1866.31 332.633   6
  -3   0  12 1870.07 340.348   6
   3   0  13 1119.91 330.956   6
  -3   0  13 1165.97 302.185   6
   3   0  14 733.347 248.633   6
  -3   0  14 369.499 209.601   6
  -3   0  15 267.338 157.243   6
  -3   0  16 125.864 127.221   6
  -3   0  17 172.269 103.222   6
  -3   1  17-97.4725 77.8575   6
  -3   1  16 123.714 135.308   6
  -3   1  15 194.112 166.217   6
   3  -1  14 1035.01 273.636   6
  -3   1  14 1015.83 266.496   6
   3  -1  13 1736.82 340.406   6
  -3   1  13 1915.49 366.310   6
   3  -1  12 713.278 254.285   6
  -3   1  12 835.991 261.145   6
   3  -1  12 1221.48 302.840   3
   3  -1  11 152.804 216.089   6
  -3   1  11 118.916 126.773   6
   3  -1  11-11.6146 93.7362   3
  -3  -1 -10 3882.14 355.991   8
  -3   1  10 4615.92 392.949   7
   3  -1  10 4314.66 456.040   3
  -3   1  10 5989.69 574.155   6
   3  -1  10 5248.40 527.399   6
  -3   1   9 4463.48 359.051   7
  -3  -1  -9 3844.91 345.409   8
  -3  -1  -8 209.439 100.999   8
   3  -1   8 365.210 123.584   7
  -3   1   8 23.1687 120.580   7
   3  -1   7 836.472 138.289   7
  -3   1   7 706.173 149.565   7
  -3   1   6 958.709 125.661   7
   3  -1   6 636.936 96.0712   7
  -3   1   5 16140.0 475.202   7
   3  -1   5 15394.9 462.406   7
  -3   1   5 15423.4 572.108  10
  -3   1   4 7288.09 280.632   7
   3  -1   4 6803.23 268.943   7
  -3   1   4 6492.07 354.753  12
  -3   1   4 6870.78 351.583  10
  -3   1   3 26703.7 453.573   7
   3  -1   3 27044.5 458.067   7
  -3   1   3 26154.3 329.453   8
  -3   1   2 3860.20 139.989   8
  -3   1   2 4007.72 141.144   7
  -3   1   2 3683.25 211.778  12
  -3   1   1 5628.09 195.085   8
  -3   1   1 5587.90 223.822  12
  -3  -1   0 20344.8 413.639   8
  -3   1   0 20773.8 357.062  12
  -3   1   0 21158.7 423.611   8
  -3   1  -1 5561.06 241.470   8
  -3  -1   1 5462.35 192.656   8
  -3   1  -2 4021.10 219.040   8
  -3  -1   2 3754.52 129.838   8
   3   1   2 3716.85 139.133   7
   3   1   3 26877.5 465.658   7
  -3  -1   3 27359.9 447.960   7
  -3  -1   3 25744.1 234.309   8
  -3   1  -3 26431.9 592.973   8
  -3  -1   4 7373.57 363.387  10
   3   1   4 6834.11 277.595   7
  -3  -1   4 7201.73 272.310   7
  -3   1  -4 7054.90 332.168   8
  -3   1  -5 15662.0 526.082   8
   3   1   5 15555.6 478.520   7
  -3  -1   5 15426.1 450.138   7
  -3  -1   5 16600.8 589.565  10
  -3   1  -6 1069.68 153.502   8
   3   1   6 763.752 138.332   7
  -3  -1   6 1020.15 131.700   7
   3   1   7 1069.19 163.899   7
  -3  -1   7 897.797 146.080   7
  -3   1  -7 983.700 163.073   8
  -3   1  -8 220.478 114.306   8
   3   1   8 363.201 129.839   7
  -3   1  -9 3901.15 329.611   8
   3   1   9 3914.70 337.785   7
  -3  -1  10 5255.19 548.742   6
  -3   1 -10 4076.70 351.373   8
   3   1  10 4903.69 476.601   3
   3   1  10 4044.34 505.086  13
   3   1  11-43.1137 165.459  13
   3   1  11-48.3263 180.190   6
   3   1  11 95.7553 112.203   3
  -3  -1  11 383.574 170.687   6
   3   1  12 840.070 278.292   6
  -3  -1  12 965.978 261.562   6
   3   1  13 1769.87 369.375   6
  -3  -1  13 1790.04 339.172   6
  -3  -1  14 1005.83 271.215   6
   3   1  14 709.845 243.638   6
  -3  -1  15 253.981 164.752   6
  -3  -1  16 244.180 143.850   6
  -3  -1  17 821.328 158.177   6
  -3   2  16 755.355 198.262   6
  -3   2  15 700.320 214.687   6
  -3   2  14 5017.86 504.949   6
   3  -2  14 622.948 219.219   6
   3  -2  13 284.305 208.055   6
  -3   2  13 720.010 255.371   6
   3  -2  12 1018.23 266.874   6
  -3   2  12 782.210 261.828   6
   3  -2  12 990.509 265.804   3
   3  -2  11 1846.05 356.221   3
   3  -2  11 2363.99 404.157   6
  -3   2  11 2430.29 432.000   6
  -3   2  10 4471.78 408.929   7
  -3   2  10 5751.82 560.988   6
   3  -2  10 4596.15 476.542   3
  -3  -2 -10 4767.34 405.697   8
  -3  -2  -9 2027.91 253.316   8
  -3   2   9 2607.94 289.492   7
  -3   2   8 7281.78 426.585   7
  -3   2   7 2852.30 251.912   7
  -3   2   6 2797.81 222.121   7
  -3   2   5 960.785 121.379   7
  -3   2   5 861.604 147.121  12
  -3   2   5 1143.56 188.899  10
  -3   2   4 10890.5 346.552   7
  -3   2   4 10361.2 450.175  12
  -3   2   4 11018.9 449.534  10
  -3   2   3 8390.11 261.863   7
  -3   2   3 8440.30 209.205   8
  -3   2   3 7798.81 358.969  12
  -3   2   2 3437.34 139.556   7
  -3   2   2 3394.85 140.453   8
  -3   2   2 3190.82 208.239  12
  -3   2   1 7865.59 233.576   8
  -3   2   1 7576.78 152.813   7
  -3   2   1 8190.46 288.120  12
  -3   2   0 64.4803 41.7447   8
  -3   2   0 15.1378 14.4014  11
  -3   2  -1 7993.73 286.765   8
  -3  -2   1 7758.53 232.026   8
  -3  -2   2 3304.89 117.807   8
   3   2   2 3214.43 136.662   7
  -3   2  -2 3548.21 208.731   8
   3   2   3 8074.60 259.379   7
  -3   2  -3 8690.24 343.577   8
  -3   2  -4 11253.6 418.473   8
   3   2   4 10544.9 347.569   7
  -3  -2   4 11052.2 447.184  10
  -3   2  -5 1040.73 141.798   8
   3   2   5 961.429 121.670   7
  -3  -2   5 1059.28 119.786   7
  -3  -2   5 1308.80 182.010  10
  -3   2  -6 2908.17 246.566   8
   3   2   6 2586.43 218.952   7
  -3  -2   6 2935.36 218.887   7
   3   2   7 3019.01 265.233   7
  -3   2  -7 2903.48 262.092   8
   3   2   8 7213.98 431.734   7
  -3   2  -8 6945.55 419.241   8
  -3   2  -9 1933.29 234.925   8
   3   2   9 2680.25 306.868   7
  -3   2 -10 4605.48 379.342   8
   3   2  10 5559.93 445.888   7
  -3  -2  10 4858.15 532.721   6
   3   2  10 5222.05 499.503   3
   3   2  10 4187.47 535.902  13
  -3  -2  11 1760.37 405.215   6
   3   2  11 1093.87 298.097  13
  -3  -2  12 813.936 255.338   6
  -3  -2  13 715.872 269.103   6
  -3  -2  14 157.581 190.016   6
  -3  -2  15 1066.36 306.323   6
  -3  -2  16 770.249 224.601   6
  -3  -2  17 540.145 161.660   6
  -3   3  16 256.016 136.608   6
  -3   3  15 2031.81 318.256   6
   3  -3  14 610.462 243.939   6
  -3   3  14 1164.51 287.553   6
   3  -3  13-7.79539 161.228   6
  -3   3  13 245.080 212.630   6
   3  -3  12 1292.31 321.511   6
   3  -3  12 1131.59 284.514   3
  -3   3  12 1264.14 329.161   6
  -3   3  11 8505.33 683.348   6
  -3   3  11 6463.64 492.506   7
   3  -3  11 7873.66 679.003   6
   3  -3  11 7443.89 634.759   3
  -3  -3 -10 2629.11 311.768   8
  -3   3  10 3074.07 348.745   7
   3  -3  10 5950.03 573.063   6
  -3   3  10 5810.74 566.934   6
   3  -3  10 2914.19 397.301   3
  -3  -3  -9 889.614 177.501   8
  -3   3   9 1198.92 223.163   7
  -3   3   8 729.633 188.293   7
  -3   3   7 303.694 107.474   7
  -3   3   6 6174.49 333.948   7
  -3   3   6 5880.02 419.598  12
  -3   3   5 5076.14 270.133   7
  -3   3   5 5052.55 346.205  12
  -3   3   5 5101.82 331.486  10
  -3   3   4 11117.0 454.353  10
  -3   3   4 10956.5 357.768   7
  -3   3   4 10231.2 464.881  12
  -3   3   3 2978.24 138.079   8
  -3   3   3 3087.05 170.601   7
  -3   3   3 3155.50 236.964  12
  -3   3   2 3324.08 148.512   8
  -3   3   2 3254.61 224.428  12
  -3   3   1 33412.7 496.338   8
  -3   3   1 33715.8 618.373  12
  -3   3   0 366.759 69.3605   8
   3   3   0 380.041 37.3705  11
  -3   3  -1 34115.6 589.808   8
  -3   3  -2 3342.91 199.229   8
  -3  -3   2 3148.17 123.430   8
  -3   3  -3 3248.19 213.599   8
   3   3   3 2705.72 162.942   7
  -3   3  -4 11123.1 415.254   8
   3   3   4 10678.5 357.590   7
  -3  -3   4 11659.1 463.501  10
  -3   3  -5 5299.60 309.117   8
   3   3   5 4779.74 268.732   7
  -3  -3   5 5114.50 339.385  10
   3   3   6 5813.77 326.998   7
  -3   3  -6 6013.82 346.632   8
  -3   3  -7 120.551 73.2609   8
   3   3   7 139.573 101.217   7
  -3   3  -8 810.402 153.364   8
   3   3   8 1051.09 212.568   7
  -3   3  -9 885.243 159.905   8
   3   3   9 1778.79 259.879   7
  -3  -3  10 3852.89 484.488   6
   3   3  10 3587.23 495.457  13
  -3   3 -10 3016.81 305.540   8
   3   3  11 7739.43 552.793   7
  -3  -3  11 6361.31 624.273   6
   3   3  11 5981.74 649.524  13
   3   3  12 621.411 295.632  13
  -3  -3  12 1084.42 308.665   6
  -3  -3  13 144.450 182.539   6
  -3  -3  14 803.763 254.153   6
  -3  -3  15 2764.94 399.875   6
  -3  -3  16 776.788 217.072   6
  -3  -3  17 119.349 110.978   6
  -3   4  15 860.840 252.232   6
   3  -4  14 68.2334 167.756   6
  -3   4  14 603.767 240.746   6
   3  -4  13 491.125 241.613   6
  -3   4  13 446.136 185.012   6
   3  -4  13 650.396 234.273   3
   3  -4  12 4816.98 558.581   6
  -3   4  12 5464.10 559.713   6
   3  -4  12 5289.14 556.531   3
  -3  -4 -11 8187.03 553.381   8
  -3   4  11 7728.68 535.217   7
   3  -4  11 8383.88 709.193   6
  -3   4  11 7725.04 645.553   6
   3  -4  11 8547.05 674.255   3
  -3   4  10 7317.80 496.426   7
   3  -4  10 7733.56 647.926   6
   3  -4  10 7343.94 604.277   3
  -3   4  10 7653.00 629.346   6
  -3  -4 -10 7164.99 499.295   8
  -3   4   9 4970.50 396.468   7
  -3   4   8 4901.40 359.556   7
  -3   4   7 2479.06 234.911   7
  -3   4   7 2322.13 282.587  12
  -3   4   6 4971.98 301.954   7
  -3   4   6 5126.88 388.498  12
  -3   4   5 3672.57 241.338   7
  -3   4   5 3650.01 316.154  12
  -3   4   5 3484.75 281.618  10
  -3   4   4 7854.07 385.834  10
  -3   4   4 7956.80 317.023   7
  -3   4   4 7774.83 411.924  12
  -3   4   3 20483.2 384.678   8
  -3   4   3 21727.6 635.932  12
  -3   4   2 10915.9 410.795  12
  -3   4   2 10416.2 273.479   8
  -3   4   1 6182.99 223.714   8
  -3   4   1 6233.42 185.904  11
  -3   4   0 31895.1 536.602   8
  -3   4  -1 6301.93 259.429   8
  -3  -4   2 10404.4 225.862   8
  -3   4  -2 9210.70 336.637   8
  -3   4  -3 21367.3 537.160   8
  -3   4  -4 7381.22 338.566   8
   3   4   4 7549.02 316.383   7
  -3  -4   4 8259.26 389.062  10
   3   4   5 3345.48 226.549   7
  -3   4  -5 3720.37 260.282   8
  -3  -4   5 3749.81 292.670  10
  -3   4  -6 5265.75 324.879   8
   3   4   6 4942.54 308.779   7
  -3   4  -7 2145.90 224.063   8
   3   4   7 2169.41 223.971   7
  -3   4  -8 5081.16 355.718   8
   3   4   8 4790.37 363.653   7
   3   4   9 4730.36 391.689   7
  -3   4  -9 4609.32 353.455   8
   3   4  10 8074.64 533.607   7
  -3  -4  10 8350.80 667.122   6
  -3   4 -10 7071.34 444.572   8
   3   4  11 8851.35 585.477   7
  -3  -4  11 9002.01 733.472   6
  -3  -4  11 8105.35 589.748   3
   3   4  11 7295.92 714.787  13
   3   4  12 5894.86 655.903  13
  -3  -4  12 5292.99 572.439   6
  -3  -4  13 479.065 237.521   6
  -3  -4  14 39.5548 184.363   6
  -3  -4  15 1151.21 276.909   6
  -3  -4  16 938.612 233.041   6
  -3  -4  17 402.700 127.783   6
  -3   5  15 477.357 191.754   6
  -3   5  14 122.448 148.797   6
   3  -5  14-141.394 162.811   6
   3  -5  13 1323.96 332.715   6
  -3   5  13 1026.05 272.866   6
   3  -5  13 1838.76 343.681   3
   3  -5  12 6868.51 651.168   6
  -3   5  12 7073.87 629.745   6
   3  -5  12 7955.91 669.098   3
  -3  -5 -11 2011.78 287.524   8
  -3   5  11 2165.91 308.527   7
   3  -5  11 2316.36 382.966   3
   3  -5  11 2671.87 448.327   6
  -3   5  11 2153.61 368.439   6
  -3  -5 -10 4774.23 412.628   8
  -3   5  10 5634.72 449.906   7
  -3   5  10 4589.36 542.057  13
   3  -5  10 5760.90 580.505   6
   3  -5  10 4904.41 500.947   3
  -3   5  10 4381.90 474.098   6
  -3   5   9 4787.46 401.530   7
  -3   5   8 2042.86 251.855   7
  -3   5   7 1450.36 192.783   7
  -3   5   7 1759.87 265.788  12
  -3   5   6 1004.45 140.087   7
  -3   5   6 1029.05 198.683  12
  -3   5   5 49767.4 895.416   7
  -3   5   5 47390.3 1120.18  12
  -3   5   5 48950.3 1012.89  10
  -3   5   4 540.381 124.607  10
  -3   5   4 510.294 136.559  12
  -3   5   3 8540.81 265.853   8
  -3   5   3 9108.31 431.328  12
  -3   5   3 8979.49 369.637  10
  -3   5   2 10033.7 412.968  12
  -3   5   2 10270.0 288.899   8
  -3   5   1 7509.47 254.981   8
  -3   5   1 7986.93 227.965  11
  -3   5   0 1616.71 127.444   8
  -3   5  -1 7793.82 290.073   8
   3   5   1 7208.72 208.877  11
   3   5   2 5534.37 127.319  12
  -3   5  -2 10559.8 358.094   8
  -3   5  -3 8988.14 353.504   8
  -3   5  -4 518.399 101.381   8
   3   5   4 412.770 86.1976   7
  -3  -5   4 506.072 124.176  10
  -3   5  -5 48165.9 914.609   8
   3   5   5 48193.3 886.506   7
  -3  -5   5 49410.2 1019.23  10
   3   5   6 956.107 155.350   7
  -3   5  -6 1119.17 157.199   8
   3   5   7 1514.38 196.530   7
  -3   5  -7 1783.38 209.798   8
  -3   5  -8 2218.51 237.970   8
   3   5   8 1908.37 257.518   7
   3   5   9 5048.90 411.931   7
  -3   5  -9 4293.48 336.762   8
   3   5  10 5465.18 454.393   7
  -3  -5  10 5331.25 571.339   6
   3   5  10 4417.25 552.673  13
   3   5  11 2437.41 343.625   7
  -3  -5  11 2186.44 322.015   3
   3   5  11 1931.23 405.763  13
  -3  -5  12 8140.24 709.126   6
   3   5  12 7076.04 718.616  13
  -3  -5  13 753.914 237.257   6
  -3  -5  14-63.1915 157.919   6
  -3  -5  15 286.349 187.320   6
  -3  -5  16 1253.30 248.588   6
  -3  -5  17 180.918 111.847   6
   3  -6  14-59.2833 137.867   6
  -3   6  14-257.772 144.066   6
   3  -6  13 1522.58 333.075   6
  -3   6  13 1515.13 302.912   6
   3  -6  13 2336.22 376.773   3
   3  -6  12 3387.22 481.320   6
   3  -6  12 4379.61 515.100   3
  -3   6  12 2847.94 429.266   6
  -3   6  11 1037.78 210.456   7
   3  -6  11 1140.13 300.728   6
  -3   6  11 1252.69 293.191   6
   3  -6  11 976.617 243.854   3
  -3  -6 -11 1153.23 229.460   8
  -3   6  10 5212.50 538.196   6
  -3   6  10 5601.66 451.735   7
   3  -6  10 5652.32 561.900   6
   3  -6  10 4858.20 496.373   3
  -3   6  10 5084.06 570.579  13
  -3   6   9 2535.76 295.511   7
  -3   6   8 6042.84 407.818   7
  -3   6   8 5818.23 496.572  12
  -3   6   7 960.485 155.200   7
  -3   6   7 991.108 206.453  12
  -3   6   6 4521.07 304.538   7
  -3   6   6 4385.10 379.409  12
  -3   6   5 41251.6 1063.17  12
  -3   6   5 42788.5 844.852   7
  -3   6   5 41350.3 930.577  10
  -3   6   4 19273.9 674.511  12
  -3   6   4 19059.7 591.369  10
  -3   6   3 11548.0 418.699  10
  -3   6   3 11260.7 485.461  12
  -3   6   3 11477.7 325.134   8
  -3   6   2 5742.07 231.903   8
  -3   6   2 5841.68 328.503  12
  -3   6   2 5938.28 233.850  11
  -3   6   1 301.179 67.4418   8
  -3   6   1 330.702 64.5070  11
  -3   6   0 179.608 60.7634   8
  -3   6  -1 279.785 73.5941   8
   3   6   1 291.625 59.0998  11
  -3   6  -2 6132.81 280.247   8
   3   6   2 4863.41 160.520  12
   3   6   3 11146.4 279.487  12
  -3   6  -3 11424.0 398.975   8
  -3   6  -4 19175.4 546.510   8
  -3  -6   4 20570.0 611.113  10
  -3   6  -5 41351.6 848.577   8
   3   6   5 40773.1 839.489   7
  -3  -6   5 43603.5 955.258  10
   3   6   6 4611.55 308.406   7
  -3   6  -6 4631.47 305.806   8
  -3   6  -7 1283.52 178.651   8
   3   6   7 1173.24 172.703   7
   3   6   8 6153.25 414.233   7
  -3   6  -8 6163.51 385.158   8
   3   6   9 2927.65 322.920   7
  -3   6  -9 2754.95 268.854   8
  -3   6  -9 2865.16 261.432   9
   3   6  10 5173.90 432.353   7
  -3  -6  10 4903.33 537.610   6
   3   6  10 4083.40 531.634  13
   3   6  11 1121.15 223.288   7
  -3  -6  11 1676.99 349.072   6
  -3  -6  11 1469.09 263.557   3
   3   6  11 899.931 269.966  13
  -3  -6  12 4715.32 538.520   6
   3   6  12 3796.32 564.601  13
   3   6  13 1957.88 406.188  13
  -3  -6  13 994.822 282.408   6
  -3  -6  14 116.371 177.760   6
  -3  -6  15 104.316 143.845   6
  -3  -6  16 557.929 180.108   6
  -3  -6  17 24.8894 86.4757   6
   3  -7  14 437.454 164.297   3
   3  -7  14 188.486 159.829   6
   3  -7  13 842.182 277.477   6
   3  -7  13 768.384 238.305   3
   3  -7  12 534.910 242.653   6
  -3   7  12 601.758 239.249   6
   3  -7  12 727.863 244.620   3
  -3   7  11 1045.64 207.201   7
   3  -7  11 1096.91 312.413   6
  -3   7  11 1417.62 300.348   6
   3  -7  11 860.621 234.379   3
  -3  -7 -11 847.208 200.736   8
  -3   7  10 2788.17 455.540  13
  -3   7  10 2707.05 316.545   7
   3  -7  10 3254.54 446.356   6
   3  -7  10 2823.34 383.680   3
  -3   7   9 5016.18 401.960   7
  -3   7   8 206.528 103.803   7
  -3   7   8 455.831 184.451  12
  -3   7   7 5779.47 373.338   7
  -3   7   7 5605.82 450.861  12
  -3   7   6 15482.5 573.832   7
  -3   7   6 14614.9 686.385  12
  -3   7   5 12054.7 591.424  12
  -3   7   5 12071.3 510.916  10
  -3   7   4 6995.22 364.668  10
  -3   7   4 6840.64 415.808  12
  -3   7   3 6419.37 261.557   8
  -3   7   3 6429.92 378.841  12
  -3   7   3 6430.68 315.285  10
  -3   7   2 1649.92 136.360   8
  -3   7   2 1919.84 144.292  11
  -3   7   1 3186.14 183.077   8
  -3   7   1 3041.46 166.501  11
  -3   7   0 1509.25 134.257   8
  -3   7  -1 3110.89 195.575   8
   3   7   1 2853.88 158.974  11
   3   7   2 1737.43 147.509  11
   3   7   2 1507.56 103.409  12
  -3   7  -2 1863.13 162.740   8
  -3   7  -3 6337.35 303.929   8
  -3  -7   3 6845.57 325.579  10
   3   7   3 6707.31 239.755  12
  -3   7  -4 6879.53 331.387   8
  -3  -7   4 7206.53 367.028  10
   3   7   4 6242.83 275.408  12
  -3  -7   5 13064.6 523.612  10
  -3   7  -5 12043.4 459.576   8
  -3   7  -6 15118.2 542.202   8
   3   7   6 14532.2 560.674   7
   3   7   7 5727.05 376.720   7
  -3   7  -7 6097.23 364.251   8
  -3   7  -8 426.378 125.570   8
   3   7   8 369.937 142.276   7
   3   7   9 5204.09 414.107   7
  -3   7  -9 5295.88 364.357   8
  -3   7  -9 4919.19 338.620   9
   3   7  10 2849.75 336.882   7
  -3  -7  10 2312.41 398.034   6
   3   7  10 2972.48 472.018  13
   3   7  11 881.897 197.287   7
  -3  -7  11 1287.79 326.472   6
  -3  -7  11 879.460 215.579   3
   3   7  11 961.995 295.180  13
   3   7  12 724.037 306.121  13
  -3  -7  12 1193.89 316.598   6
  -3  -7  12 741.187 201.718   3
  -3  -7  13 638.014 255.371   6
   3   7  13 356.532 237.165  13
  -3  -7  14 264.242 162.152   6
  -3  -7  15 947.679 222.096   6
  -3  -7  16 134.087 138.520   6
  -3  -7  17 410.690 132.181   6
   3  -8  14 631.537 250.230   6
   3  -8  14 980.512 252.623   3
   3  -8  13 492.643 175.231   6
   3  -8  13 410.534 174.318   3
   3  -8  12 1676.00 370.285   6
   3  -8  12 1400.35 306.126   3
  -3  -8 -11-111.456 139.708   8
  -3   8  11 531.972 177.779   7
   3  -8  11 731.694 267.903   6
  -3   8  11 158.979 155.521  13
   3  -8  11 95.7623 130.277   3
  -3   8  10 1933.04 357.442  13
  -3   8  10 1621.30 252.673   7
   3  -8  10 2491.19 415.430   6
   3  -8  10 1798.49 313.809   3
   3  -8   9 3055.86 422.994   6
  -3   8   9 2873.35 310.371   7
  -3   8   8 2365.41 263.371   7
  -3   8   8 2230.59 329.863  12
  -3   8   7 734.142 156.131   7
  -3   8   7 612.390 184.452  12
  -3   8   6 5949.12 368.592   7
  -3   8   6 5529.00 443.540  12
  -3   8   5 4001.98 360.322  12
  -3   8   5 4282.74 313.258  10
  -3   8   4 12967.7 591.405  12
  -3   8   4 13275.3 499.323  10
  -3   8   3 2716.16 181.118   8
  -3   8   3 2783.89 214.949  10
  -3   8   3 2801.99 267.341  12
  -3   8   2 5286.59 248.193   8
  -3   8   2 5731.65 255.894  11
  -3   8   1 13860.0 389.616   8
  -3   8   0 32737.1 610.336   8
   3   8   1 13821.2 365.870  11
  -3   8  -1 13775.8 415.424   8
  -3   8  -2 5613.91 277.946   8
   3   8   2 4975.12 245.002  11
   3   8   3 2833.06 174.645  12
  -3   8  -3 2853.90 210.282   8
  -3  -8   3 2887.58 213.978  10
  -3   8  -4 13437.5 468.100   8
   3   8   4 13486.1 414.520  12
  -3  -8   4 14056.7 513.666  10
  -3   8  -5 4207.94 275.802   8
   3   8   5 4586.12 270.944  12
  -3  -8   5 4250.59 306.881  10
  -3   8  -6 6144.79 349.928   8
   3   8   6 5778.40 366.475   7
   3   8   7 527.934 132.291   7
  -3   8  -7 506.710 122.445   8
   3   8   8 2306.03 258.103   7
  -3   8  -8 2491.62 251.632   8
  -3   8  -9 3146.57 284.911   8
   3   8   9 2952.66 314.926   7
  -3   8  -9 2999.73 276.933   9
   3   8  10 2139.42 296.378   7
  -3  -8  10 1920.01 341.686   6
   3   8  10 1833.64 392.248  13
  -3  -8  11 592.601 279.659   6
   3   8  11 133.720 111.811   7
  -3  -8  11 399.540 165.498   3
   3   8  11 147.458 191.881  13
  -3  -8  12 1345.95 341.622   6
  -3  -8  12 1340.88 272.040   3
   3   8  12 1443.44 366.603  13
   3   8  13 248.598 210.582  13
  -3  -8  13 405.351 197.680   6
  -3  -8  14 322.438 209.914   6
  -3  -8  15 724.252 235.129   6
  -3  -8  16 138.882 104.728   6
  -3  -8  17 217.216 137.332   6
   3  -9  14 1765.55 331.825   6
   3  -9  14 1802.86 312.586   3
   3  -9  13 464.567 221.461   6
   3  -9  13 646.072 220.432   3
   3  -9  12 3625.05 478.051   6
   3  -9  12 5155.84 548.480   3
   3  -9  11 621.132 263.094   6
  -3   9  11 239.927 120.442   7
   3  -9  11 393.195 173.014   3
  -3   9  11 410.726 214.065  13
  -3   9  10 80.6928 108.283   7
   3  -9  10 124.935 140.655   3
  -3   9  10 166.302 201.270  13
   3  -9  10 51.2072 142.339   6
  -3   9   9 313.828 116.695   7
   3  -9   9 500.984 223.752   6
  -3   9   9 423.553 177.778  12
  -3   9   8 5314.12 390.503   7
  -3   9   8 4976.87 463.755  12
  -3   9   7 4165.53 337.152   7
  -3   9   7 4156.82 415.470  12
  -3   9   6 357.562 95.2531   7
  -3   9   6 411.712 152.708  12
  -3   9   5 3342.98 331.706  12
  -3   9   4 3956.44 275.396  10
  -3   9   4 3739.75 335.304  12
  -3   9   3 6234.82 317.718  10
  -3   9   3 5999.74 387.286  12
  -3   9   3 6218.10 302.895  11
  -3   9   2 3759.80 220.996   8
  -3   9   2 3982.07 227.103  11
  -3   9   1 2202.94 168.984   8
  -3   9   0 18633.7 478.327   8
  -3   9  -1 2549.36 191.576   8
  -3   9  -2 4247.48 251.437   8
   3   9   2 3840.01 226.994  11
  -3   9  -3 6274.43 312.891   8
  -3  -9   3 6928.93 332.230  10
   3   9   3 6288.79 273.211  12
  -3  -9   4 3867.68 216.756   1
  -3   9  -4 3718.76 254.208   8
   3   9   4 3882.59 235.431  12
  -3  -9   4 4120.06 280.549  10
  -3   9  -5 3113.99 244.046   8
   3   9   5 3426.78 242.391  12
  -3  -9   5 3616.21 281.110  10
   3   9   6 363.912 108.261   7
  -3   9  -6 324.869 93.6376   8
   3   9   7 4402.15 346.016   7
  -3   9  -7 4055.15 299.041   8
   3   9   8 5330.62 395.579   7
  -3   9  -8 5534.69 363.184   8
  -3   9  -8 5562.35 364.618   9
  -3   9  -9 256.484 111.262   9
  -3   9  -9 251.148 89.9902   8
   3   9   9 317.331 119.232   7
  -3  -9   9 230.296 132.067   6
   3   9   9 405.908 224.564  13
   3   9  10 121.239 116.294   7
   3   9  10 6.60698 147.453  13
  -3  -9  10 198.056 231.376   6
   3   9  11 425.987 200.778  13
   3   9  11 598.624 169.944   7
  -3  -9  11 365.414 158.286   3
  -3  -9  11 386.405 235.347   6
  -3  -9  12 4505.55 525.085   6
  -3  -9  12 5053.73 490.358   3
   3   9  12 4764.86 612.685  13
   3   9  13 792.703 274.266  13
  -3  -9  13 578.874 233.626   6
  -3  -9  14 1591.06 328.600   6
  -3  -9  15 401.519 198.812   6
  -3  -9  16 146.934 135.091   6
  -3  -9  17 349.306 120.574   6
   3 -10  14 973.160 275.103   6
   3 -10  14 734.309 224.925   3
   3 -10  13 1955.58 362.655   6
   3 -10  13 2015.82 354.557   3
   3 -10  12 549.843 237.025   6
   3 -10  12 764.354 232.539   3
   3 -10  11 2380.86 390.136   6
  -3  10  11 3179.07 471.541  13
   3 -10  11 2318.65 370.079   3
  -3  10  11 2629.28 327.194   7
   3 -10  10 4983.85 556.815   6
  -3  10  10 5076.89 446.566   7
  -3  10  10 6041.52 622.743  13
  -3  10   9 3024.17 324.323   7
   3 -10   9 3684.85 449.554   6
  -3  10   9 3686.08 444.685  12
  -3  10   8 2443.69 275.631   7
  -3  10   8 2130.05 307.797  12
  -3  10   7 7557.60 452.835   7
  -3  10   7 7432.25 557.384  12
  -3  10   6 4182.53 397.137  12
  -3  10   5 1381.78 241.367  12
  -3  10   4 5304.17 316.063  10
  -3  10   4 4870.93 392.839  12
  -3  10   3 5607.43 393.018  12
  -3  10   3 6266.41 313.147  11
  -3  10   3 6163.62 317.439  10
  -3  10   2 2005.16 171.074   8
  -3  10   2 2236.42 185.241  11
  -3  10   1 1803.66 163.127   8
  -3  10   0 719.605 108.682   8
  -3  10  -1 2084.24 180.159   8
  -3  10  -2 2165.09 188.972   8
   3  10   2 2081.81 178.409  11
  -3 -10   3 6052.51 315.959  10
   3  10   3 5925.49 280.541  12
  -3  10  -3 6065.35 313.413   8
   3  10   3 5959.17 305.868  11
  -3 -10   4 5296.79 315.926  10
   3  10   4 4763.29 274.051  12
  -3  10  -4 5223.18 304.641   8
  -3  10  -5 1691.83 181.810   8
   3  10   5 1737.68 185.659  12
  -3  10  -6 4706.70 316.291   8
  -3  10  -7 7111.05 397.324   8
   3  10   7 7299.93 450.945   7
  -3  10  -8 2478.68 244.748   8
   3  10   8 2303.09 270.833   7
  -3  10  -8 2368.86 242.215   9
  -3  10  -9 3549.65 295.851   8
   3  10   9 3363.81 346.303   7
  -3 -10   9 3345.05 442.121   6
   3  10   9 3294.50 471.010  13
  -3  10  -9 3408.88 312.737   9
   3  10  10 5264.46 619.114  13
   3  10  10 4934.03 448.999   7
  -3 -10  10 4683.56 524.360   6
   3  10  11 2837.25 355.018   7
  -3 -10  11 2085.33 383.840   6
  -3 -10  11 2679.08 355.502   3
   3  10  11 3138.93 487.830  13
  -3 -10  12 886.585 279.080   6
   3  10  12 513.236 274.350  13
  -3 -10  12 1092.28 245.604   3
  -3 -10  13 2155.84 383.716   6
   3  10  13 1999.44 443.566  13
  -3 -10  14 458.645 201.260   6
  -3 -10  15 1894.56 318.859   6
  -3 -10  16 646.382 175.129   6
  -3 -10  17 13.5611 72.5637   6
   3 -11  14 1219.12 277.989   6
   3 -11  14 981.944 240.138   3
   3 -11  13 879.263 267.209   6
   3 -11  13 1223.55 283.674   3
   3 -11  12 1188.28 320.544   6
   3 -11  12 828.453 244.241   3
  -3  11  11 85.5854 93.5770   7
   3 -11  11 200.470 198.240   6
   3 -11  11-16.0112 123.322   3
  -3  11  11 324.585 174.114  13
  -3  11  10 638.239 232.756   5
  -3  11  10 366.237 138.223   7
   3 -11  10 489.598 177.034   6
  -3  11  10 301.300 193.805  13
  -3  11   9 137.970 121.400   5
  -3  11   9 146.508 112.622   7
   3 -11   9-53.3130 126.656   6
  -3  11   9 72.6901 143.834  13
  -3  11   9-42.7070 113.301  12
  -3  11   8 1940.52 307.782  12
  -3  11   8 2203.66 269.562   7
  -3  11   7 2890.98 302.016   7
  -3  11   7 3153.20 371.988  12
  -3  11   6 794.289 191.774  12
  -3  11   5 2088.06 278.203  12
  -3  11   4-50.2632 97.2647  12
  -3  11   4 1.58499 60.4110  10
  -3  11   3 323.093 94.7999  10
  -3  11   3 248.289 119.232  12
  -3  11   3 175.339 80.6171  11
  -3  11   3 268.116 59.5277   9
  -3  11   2 5826.16 298.241   8
  -3  11   2 6244.45 308.336  11
  -3  11   2 5821.17 276.590  10
  -3  11   1 516.225 99.6431   8
  -3  11   0 25182.3 604.520   8
  -3  11  -1 663.892 116.001   8
  -3  11  -2 5876.17 306.802   8
   3  11   2 6014.72 307.198  11
   3  11   3 124.309 53.9164  12
   3  11   3 48.2054 89.6666  11
  -3 -11   3 265.688 89.3411  10
  -3  11  -3 224.777 79.2270   8
  -3  11  -4 45.2616 55.6021   8
   3  11   4 110.441 84.2749  12
  -3 -11   4 36.2429 56.9006  10
  -3  11  -5 2135.89 209.406   8
   3  11   5 2278.41 220.871  12
  -3  11  -6 1345.33 179.543   8
  -3  11  -7 3004.50 268.531   8
   3  11   7 2780.41 289.414   7
  -3  11  -7 2849.91 263.561   9
  -3  11  -8 2139.99 244.004   9
   3  11   8 1965.81 254.486   7
  -3  11  -8 2347.09 241.332   8
  -3  11  -9 299.184 112.317   8
   3  11   9 189.353 103.030   7
  -3 -11   9 253.278 188.920   6
   3  11   9 42.3087 153.562  13
  -3  11  -9 27.2490 79.0462   9
  -3  11 -10 436.215 147.092   9
   3  11  10 561.865 275.526  13
   3  11  10 778.986 198.468   7
  -3 -11  10 496.120 250.435   6
   3  11  11 345.444 263.129  13
   3  11  11 169.323 108.831   7
  -3 -11  11 12.9399 191.541   6
  -3 -11  11 185.587 110.888   3
  -3 -11  12 1167.65 306.682   6
  -3 -11  12 1245.99 253.987   3
   3  11  12 1360.55 354.025  13
  -3 -11  13 1396.51 322.921   6
  -3 -11  13 1310.41 257.016   3
   3  11  13 1077.62 342.064  13
  -3 -11  14 1157.25 273.923   6
   3  11  14 1153.59 331.879  13
  -3 -11  15 599.358 194.425   6
  -3 -11  16 622.898 181.477   6
  -3 -11  17 899.060 168.460   6
   3 -12  14 537.175 244.699   6
   3 -12  14 800.133 215.343   3
   3 -12  13 532.389 250.572   6
   3 -12  13 668.323 221.391   3
   3 -12  12 794.144 266.825   6
  -3  12  12 1060.94 316.933  13
   3 -12  12 802.219 252.259   3
   3 -12  11 961.777 239.606   3
   3 -12  11 628.793 228.681   6
  -3  12  11 1245.12 312.260  13
  -3  12  10 138.449 113.729   5
  -3  12  10 36.5670 81.8048   7
   3 -12  10-57.0626 163.059   6
  -3  12  10 56.4143 151.962  13
  -3  12   9 1126.74 269.183   5
  -3  12   9 957.519 193.720   7
  -3  12   9 832.585 210.767  12
   3 -12   9 1057.89 276.855   6
  -3  12   9 1311.17 310.536  13
  -3  12   8 1643.51 243.596   7
  -3  12   8 1746.21 303.222  12
  -3  12   7 182.748 87.8886   7
  -3  12   7 312.592 151.187  12
  -3  12   6 1492.60 264.021  12
  -3  12   5 3781.25 383.933  12
  -3  12   4 3397.88 349.944  12
  -3  12   3 535.984 74.7631   9
  -3  12   3 517.610 111.543  10
  -3  12   3 366.630 89.7158  11
  -3  12   2 5563.03 303.762   8
  -3  12   2 6135.03 287.769  10
  -3  12   2 6548.73 328.000  11
  -3  12   1 125.529 69.2342   8
  -3  12   0 29.9575 55.8191   8
  -3  12  -1 176.110 76.5396   8
  -3  12  -2 6327.79 330.658   8
  -3 -12   2 6054.45 283.193  10
   3  12   2 5924.36 317.615  11
   3  12   3 719.913 124.660  12
  -3 -12   3 605.975 110.893  10
   3  12   3 387.651 101.895  11
  -3  12  -3 568.208 118.671   8
  -3 -12   4 4154.76 279.529  10
   3  12   4 3754.94 269.157  12
  -3  12  -4 4120.91 277.091   8
  -3  12  -5 4097.69 291.163   8
   3  12   5 4294.98 303.030  12
  -3  12  -6 1735.21 202.310   8
  -3  12  -7 287.841 102.137   8
   3  12   7 176.658 97.7141   7
  -3  12  -7 220.695 105.595   9
  -3  12  -8 1740.22 213.893   8
   3  12   8 1357.48 222.021   7
  -3  12  -8 1816.72 234.288   9
   3  12   9 1036.92 207.781   7
  -3 -12   9 547.339 204.881   6
  -3  12  -9 884.327 174.352   9
   3  12   9 850.420 314.917  13
  -3  12 -10 42.6570 102.431   9
   3  12  10-116.395 121.725   7
  -3 -12  10-62.6206 149.370   6
   3  12  10 70.5003 178.985  13
   3  12  11 622.583 278.997  13
  -3 -12  11 1135.30 308.941   6
  -3 -12  11 988.649 236.113   3
  -3 -12  12 1036.27 228.284   3
  -3 -12  12 748.238 268.361   6
   3  12  12 1382.09 352.709  13
  -3 -12  13 305.599 161.660   6
  -3 -12  13 389.725 146.993   3
  -3 -12  14 366.824 198.005   6
   3  12  14 656.469 247.231  13
  -3 -12  15 895.409 217.211   6
  -3 -12  16 1207.32 219.576   6
  -3 -12  17 54.6269 66.4384   6
   3 -13  14 544.508 187.776   3
   3 -13  13 499.868 235.124   6
   3 -13  13 494.105 190.132   3
  -3  13  12 573.351 238.772  13
   3 -13  12 498.306 220.960   6
   3 -13  12 185.522 132.319   3
   3 -13  11 376.049 205.358   6
  -3  13  11 522.702 320.494   5
   3 -13  11-199.716 143.899   3
  -3  13  11 202.017 178.894  13
  -3  13  10 600.531 156.628   7
  -3  13  10 645.382 234.850   5
   3 -13  10 977.155 272.338   6
  -3  13  10 942.735 298.108  13
  -3  13  10 782.576 237.186  12
  -3  13   9 1070.72 271.366   5
  -3  13   9 992.814 195.676   7
   3 -13   9 904.620 256.381   6
  -3  13   9 1314.66 308.217  13
  -3  13   9 1137.37 268.713  12
  -3  13   8 1429.55 231.844   7
   3 -13   8 1955.84 264.775   4
   3 -13   8 1171.58 280.523   6
  -3  13   8 1996.51 315.394  12
  -3  13   7 3637.39 404.075  12
  -3  13   6 815.396 186.012  12
  -3  13   5 543.572 168.825  12
  -3  13   4 6952.03 501.992  12
  -3  13   3 10844.3 458.937  11
  -3  13   3 11022.4 414.670  10
  -3  13   2 4798.41 252.966  10
  -3  13   2 4682.66 233.202   9
  -3  13   2 4937.33 298.656  11
  -3  13   2 4262.64 278.318   8
  -3  13   1 5521.25 310.893   8
  -3  13   0-41.0160 65.3342   8
  -3  13  -1 5783.44 321.265   8
  -3  13  -2 4924.07 304.678   8
   3  13   2 4740.96 301.762  11
  -3 -13   2 4930.25 265.447  10
  -3  13  -3 11202.4 453.577   8
  -3 -13   3 10669.3 483.030   1
   3  13   3 10655.0 464.993  11
  -3 -13   3 11318.3 423.341  10
  -3  13  -4 7175.65 375.513   8
   3  13   4 7177.28 387.035  12
  -3  13  -5 532.237 116.263   8
  -3  13  -6 880.885 147.422   8
  -3  13  -6 880.882 166.916   9
   3  13   7 3101.78 317.326   7
  -3  13  -7 3306.09 304.232   9
  -3  13  -7 3573.73 295.179   8
  -3  13  -8 1646.41 224.126   9
  -3  13  -8 1803.91 219.986   8
   3  13   8 1847.77 268.831   7
  -3  13  -9 933.840 191.293   9
   3  13   9 1014.90 212.533   7
  -3 -13   9 1236.47 335.044   6
   3  13   9 845.646 287.119  13
  -3 -13  10 811.664 255.883   6
   3  13  10 577.052 173.009   7
   3  13  10 928.509 299.163  13
  -3  13 -10 446.021 147.727   9
  -3 -13  11 144.742 133.801   3
   3  13  11 273.069 200.196  13
  -3 -13  11-7.34805 127.330   6
  -3 -13  12 84.3014 124.913   6
  -3 -13  12 392.455 145.956   3
   3  13  12 186.426 146.811  13
  -3 -13  13 343.988 169.029   6
   3  13  13 700.288 255.918  13
  -3 -13  13 487.910 177.671   3
  -3 -13  14 462.796 197.518   6
   3  13  14 363.066 212.059  13
  -3 -13  15 953.444 228.208   6
  -3 -13  16 486.076 148.142   6
  -3 -13  17 669.246 136.559   6
   3 -14  15 578.164 169.265   3
   3 -14  14 558.715 200.812   3
   3 -14  13 122.800 161.112   6
   3 -14  13 101.540 147.901   3
   3 -14  12 514.871 219.759   6
  -3  14  12 344.959 215.643  13
   3 -14  12 360.700 190.216   3
  -3  14  11 763.686 218.259   5
   3 -14  11 478.820 228.822   6
  -3  14  11 740.527 238.011  13
  -3  14  10 1073.58 306.658  13
  -3  14  10 414.395 186.346   5
  -3  14  10 487.602 159.167   7
   3 -14  10 467.295 177.358   6
  -3  14  10 421.397 195.519  12
  -3  14   9 2651.03 416.123   5
  -3  14   9 2439.29 312.838   7
   3 -14   9 2669.62 417.447   6
  -3  14   9 2859.09 425.817  13
  -3  14   9 2464.84 374.495  12
  -3  14   8 807.573 242.642   5
  -3  14   8 539.169 141.142   7
   3 -14   8 642.955 167.691   4
   3 -14   8 657.122 178.961   6
  -3  14   8 730.035 215.218  12
  -3  14   7 293.949 145.956  12
  -3  14   6 522.394 159.360  12
  -3  14   5 1558.12 265.822  12
  -3  14   4 1233.16 232.046  12
  -3  14   3 56.1621 87.3997  11
  -3  14   2 5976.37 276.097   9
  -3  14   2 5880.71 333.868  11
  -3  14   2 5315.63 259.100  10
  -3  14   1 5076.67 311.093   8
  -3  14   1 5621.72 286.530   9
  -3  14   0 2920.68 237.933   8
  -3  14  -1 5399.85 321.075   8
  -3  14  -2 5582.44 329.049   8
   3  14   2 5569.12 342.096  11
  -3 -14   2 6048.74 286.877  10
   3  14   3-38.6091 99.7941  11
  -3  14  -3-31.2761 54.8409   8
  -3 -14   3 69.9748 56.5468  10
  -3 -14   3 95.3505 107.065   1
   3  14   4 1225.62 171.232  12
  -3  14  -4 1267.44 170.714   8
  -3  14  -5 1552.57 189.937   8
  -3  14  -5 1316.89 180.497   9
  -3  14  -6 550.435 135.499   9
  -3  14  -6 719.952 139.199   8
  -3  14  -7 497.770 129.236   8
  -3  14  -7 301.921 125.086   9
   3  14   8 814.515 194.688   7
  -3  14  -8 863.633 154.971   8
  -3 -14   8 809.893 280.538   6
  -3  14  -8 925.201 179.738   9
   3  14   9 3096.02 493.491  13
   3  14   9 2509.49 321.530   7
  -3 -14   9 2997.97 441.693   6
  -3  14  -9 2739.33 304.371   9
   3  14  10 486.005 161.287   7
  -3 -14  10 503.638 227.806   6
   3  14  10 545.848 233.467  13
  -3  14 -10 691.117 165.871   9
  -3 -14  11 380.095 198.479   6
   3  14  11 703.298 283.860  13
  -3 -14  11 602.574 175.292   3
  -3 -14  12 262.222 184.561   6
  -3 -14  12 508.878 160.291   3
   3  14  12 631.255 256.672  13
  -3 -14  13-47.9444 146.939   6
  -3 -14  13 102.015 106.822   3
   3  14  13 263.595 175.827  13
  -3 -14  14 309.277 191.492   6
   3  14  14 302.709 187.253  13
  -3 -14  15 240.722 153.245   6
  -3 -14  16 868.898 180.063   6
   3 -15  15 660.994 171.870   3
   3 -15  14 2084.50 329.810   3
   3 -15  13 545.134 208.616   3
   3 -15  13 426.870 174.230   6
   3 -15  12 473.990 223.223   6
  -3  15  12 391.046 186.974  13
   3 -15  12 213.014 123.200   3
  -3  15  11-22.6336 96.5898   5
   3 -15  11-84.0465 178.886   6
  -3  15  10 116.830 86.2617   7
   3 -15  10 551.068 242.636   6
  -3  15  10 457.602 223.370  13
  -3  15  10 424.958 177.206  12
  -3  15  10 335.206 164.437   5
  -3  15   9 220.440 101.506   7
   3 -15   9 100.753 152.359   6
  -3  15   9-87.9653 134.266   5
  -3  15   9 388.692 165.906  12
  -3  15   9 53.0570 123.359  13
  -3  15   8 565.940 200.658  12
   3 -15   8 756.887 181.542   4
  -3  15   8 802.108 242.788   5
  -3  15   8 623.773 167.206   7
   3 -15   8 613.812 227.128   6
  -3  15   7 805.469 222.855  12
  -3  15   6 296.268 148.092  12
  -3  15   5 397.661 168.642  12
  -3  15   4 1014.15 157.303  11
  -3  15   4 777.143 209.089  12
  -3  15   3-39.1809 75.8873  11
  -3  15   2 14204.3 543.090  11
  -3  15   2 13935.0 438.396   9
  -3  15   1 3201.61 261.872   8
  -3  15   1 3680.05 249.375   9
  -3  15   0 18870.2 605.765   8
  -3  15   0 20815.8 588.507   9
  -3  15  -1 3676.87 272.511   8
  -3  15  -1 4050.86 275.982   9
  -3  15  -2 14165.1 534.418   8
   3  15   2 14180.5 553.256  11
  -3  15  -2 14418.9 527.990   9
  -3 -15   3 11.1176 95.3625   1
  -3  15  -3 33.0837 57.7898   8
  -3  15  -3-53.3853 83.1845   9
   3  15   3-31.6819 93.6339  11
  -3  15  -4 1020.89 159.487   8
  -3  15  -4 1085.31 173.740   9
   3  15   4 1083.31 173.608  12
  -3  15  -5 433.526 120.473   8
  -3  15  -5 307.388 106.871   9
  -3  15  -6 591.321 135.174   8
  -3  15  -6 214.302 89.6635   9
  -3  15  -7 894.967 174.958   9
  -3  15  -7 1094.18 174.226   8
  -3  15  -8 756.655 168.180   9
   3  15   8 623.586 168.024   7
  -3 -15   8 441.243 226.557   6
  -3  15  -8 876.106 154.695   8
  -3  15  -9 141.796 116.417   9
   3  15   9 222.501 121.529   7
  -3 -15   9 686.402 283.937   6
   3  15   9 321.481 198.931  13
  -3  15 -10 402.461 146.759   9
   3  15  10 350.402 149.276   7
  -3 -15  10 437.479 179.696   6
   3  15  10 338.580 230.596  13
  -3 -15  11 44.8604 131.752   6
   3  15  11 44.3507 159.474  13
  -3 -15  11 43.4890 83.8923   3
  -3 -15  12 494.472 203.058   6
   3  15  12 371.282 198.844  13
  -3 -15  12 196.590 114.148   3
  -3 -15  13 495.312 236.689   6
  -3 -15  13 404.814 131.802   3
   3  15  13 495.586 228.420  13
   3  15  14 2225.70 399.939  13
  -3 -15  14 2247.13 359.765   6
  -3 -15  15 677.607 185.357   6
  -3 -15  16 819.059 175.849   6
   3 -16  15 965.533 207.660   3
   3 -16  14 634.126 193.887   3
   3 -16  13 202.702 144.525   3
   3 -16  12 175.990 110.797   3
  -3  16  12 139.186 131.436  13
  -3  16  12 136.961 95.1528   5
   3 -16  12 248.324 199.131   6
  -3  16  11 934.623 254.549   5
   3 -16  11 1210.24 332.760   6
  -3  16  11 1116.53 286.242  13
  -3  16  10 437.062 173.602   5
   3 -16  10 575.207 236.420   6
  -3  16  10 970.980 276.048  13
  -3  16   9 3991.80 504.419   5
   3 -16   9 4217.40 528.930   6
  -3  16   9 4725.38 554.828  13
  -3  16   9 3636.11 397.461   7
  -3  16   9 3905.37 489.179  12
   3 -16   8 469.125 188.950   6
  -3  16   8 675.606 235.443   5
   3 -16   8 423.779 152.498   4
  -3  16   8 370.714 152.413   7
  -3  16   8 597.103 210.136  12
  -3  16   8 441.577 212.823  13
  -3  16   7 1190.90 291.302   5
   3 -16   7 976.700 196.374   4
  -3  16   7 1086.49 252.653  12
  -3  16   6 2516.45 356.862  12
  -3  16   5 837.768 222.382  12
  -3  16   4 1723.01 291.951  12
  -3  16   4 2206.43 246.628  11
  -3  16   3 4000.00 311.345  11
  -3  16   2 3382.15 282.213  11
  -3  16   2 3308.05 229.852   9
  -3  16   1 3906.31 291.610   8
  -3  16   1 3865.05 263.502   9
  -3  16   0 449.002 116.486   9
  -3  16   0 339.157 108.207   8
  -3  16  -1 3966.05 299.872   8
  -3  16  -1 4299.97 297.690   9
  -3  16  -2 3490.49 278.220   8
  -3 -16   2 3236.60 327.526   1
   3  16   2 3231.59 284.844  11
  -3  16  -2 3445.12 274.289   9
  -3 -16   3 3987.52 339.874   1
  -3  16  -3 4506.58 322.852   8
   3  16   3 4388.55 332.712  11
  -3  16  -3 4225.12 312.525   9
  -3  16  -4 2252.47 229.296   8
   3  16   4 2108.65 249.870  11
  -3  16  -4 2357.71 243.261   9
  -3  16  -5 961.490 173.935   9
  -3  16  -5 688.997 142.540   8
  -3  16  -6 2633.85 257.428   8
  -3  16  -6 2933.24 284.456   9
  -3  16  -7 1097.39 199.776   9
  -3  16  -7 1042.67 178.421   8
  -3  16  -8 463.935 140.038   9
  -3  16  -8 358.514 105.455   8
   3  16   8 419.445 149.604   7
  -3 -16   8 71.0242 144.113   6
   3  16   9 4078.45 415.729   7
  -3 -16   9 3294.58 482.203   6
   3  16   9 4429.44 583.331  13
  -3  16  -9 3949.38 369.385   9
  -3  16 -10 530.650 168.832   9
  -3 -16  10 476.971 212.126   6
   3  16  10 284.179 218.448  13
  -3 -16  11 786.364 237.263   6
   3  16  11 810.633 276.452  13
  -3 -16  11 830.354 208.522   3
  -3 -16  12 218.374 157.243   6
   3  16  12 20.7478 182.810  13
  -3 -16  12-192.957 96.4616   3
   3  16  13 305.453 204.195  13
  -3 -16  13 196.164 177.968   6
  -3 -16  13 245.647 114.224   3
  -3 -16  14 517.964 177.068   6
   3  16  14 669.272 216.536  13
  -3 -16  15 546.781 174.229   6
  -3 -16  16 918.723 172.454   6
   3 -17  15 280.794 124.364   3
   3 -17  14 190.038 115.600   3
   3 -17  13 478.827 188.269   3
   3 -17  12-118.383 138.587   3
   3 -17  12 191.681 180.151   6
  -3  17  12 255.660 192.355  13
  -3  17  12-48.7872 120.299   5
  -3  17  11 535.887 209.570   5
  -3  17  11 893.553 268.743  13
   3 -17  11 499.164 213.873   6
  -3  17  10 562.837 232.268   5
  -3  17  10 278.078 199.711  13
   3 -17  10 766.928 247.489   6
  -3  17   9 1.78908 105.263   7
   3 -17   9 120.048 182.384   6
  -3  17   9 88.1818 163.452  13
  -3  17   9 35.8333 129.202   5
  -3  17   9-20.1346 113.831  12
  -3  17   8 1857.36 284.184   7
   3 -17   8 2050.39 365.218   6
   3 -17   8 2241.59 303.931   4
  -3  17   8 2304.51 380.881  12
  -3  17   8 2401.95 413.222   5
  -3  17   8 2076.46 375.378  13
  -3  17   7 691.253 222.633   5
   3 -17   7 569.458 225.646   6
   3 -17   7 786.204 203.487   4
  -3  17   7 832.167 214.902  12
  -3  17   6 6206.28 562.306  12
  -3  17   5 4663.05 473.257  12
  -3  17   4 725.750 149.366  11
  -3  17   4 736.473 212.584  12
  -3  17   3 1858.00 230.290  11
  -3  17   2 2350.44 206.154   9
  -3  17   2 2409.59 247.484  11
  -3  17   1 844.300 133.817   9
  -3  17   0 309.180 95.4177   9
  -3  17   0 144.319 84.0019   8
  -3  17  -1 907.968 147.974   9
  -3  17  -1 864.112 149.084   8
  -3 -17   2 2349.14 284.599   1
   3  17   2 2115.80 245.580  11
  -3  17  -2 2481.55 247.801   8
  -3  17  -2 2532.29 246.912   9
  -3  17  -3 2102.58 236.250   8
  -3 -17   3 1946.87 256.528   1
   3  17   3 2033.95 244.045  11
  -3  17  -3 2013.44 231.225   9
  -3  17  -4 693.419 149.159   9
   3  17   4 926.950 171.597  11
  -3  17  -4 1016.49 169.418   8
  -3  17  -5 5008.23 358.377   8
  -3  17  -5 4853.51 364.908   9
  -3  17  -6 6398.62 411.584   8
  -3  17  -6 6459.00 435.747   9
  -3  17  -7 704.164 175.819   9
  -3  17  -7 551.963 135.384   8
  -3  17  -8 2134.12 278.539   9
   3  17   8 1680.92 284.497   7
  -3 -17   8 1496.78 280.892   6
  -3  17  -9 44.3731 94.5933   9
   3  17   9-17.6025 104.810   7
  -3 -17   9-263.319 179.115   6
   3  17   9 231.103 201.939  13
  -3 -17  10 171.187 171.708   6
   3  17  10 279.103 204.498  13
  -3 -17  11 689.418 256.460   6
   3  17  11 1150.94 325.323  13
  -3 -17  11 485.609 173.177   3
  -3 -17  12 45.5963 87.8961   3
  -3 -17  12 75.9040 171.642   6
   3  17  12 203.415 171.615  13
  -3 -17  13 665.405 203.918   6
   3  17  13 437.381 196.279  13
  -3 -17  14-21.7947 111.111   6
   3  17  14 72.4281 112.426  13
  -3 -17  15 27.3521 97.7752   6
  -3 -17  16 88.7305 95.0050   6
   3 -18  15 524.108 149.807   3
   3 -18  14 150.376 112.007   3
   3 -18  13-24.2022 92.5624   3
  -3  18  12-8.06387 79.8859   5
  -3  18  12 302.909 192.145  13
   3 -18  12 270.431 137.396   3
   3 -18  11 155.008 171.116   6
  -3  18  11 239.377 157.669   5
  -3  18  11 366.399 157.216  13
   3 -18  10 248.339 203.213   6
  -3  18  10 54.9399 113.322   5
  -3  18  10 230.553 172.043  13
  -3  18   9 1466.09 316.522   5
  -3 -18  -9 912.631 250.423   1
  -3  18   9 1340.11 250.576   7
  -3  18   9 1730.99 335.766  13
   3 -18   9 1342.38 340.229   6
  -3  18   9 1204.71 272.304  12
  -3  18   8 1607.55 343.122   5
  -3  18   8 1175.36 233.951   7
   3 -18   8 1858.76 342.722   6
   3 -18   8 1249.92 241.033   4
  -3  18   8 1528.74 320.845  12
  -3  18   8 1880.24 341.435  13
  -3  18   7 450.443 190.842   5
   3 -18   7 481.150 192.925   6
   3 -18   7 624.294 183.494   4
  -3  18   7 234.153 149.660  12
  -3  18   6 519.335 201.716   5
   3 -18   6 891.625 190.227   4
  -3  18   6 613.986 204.276  12
  -3  18   5 942.048 234.579  12
  -3  18   4-83.9620 116.558  11
  -3  18   4 139.020 105.189  12
  -3  18   3 2174.89 251.656  11
  -3  18   2 626.583 116.461   9
  -3  18   2 299.539 115.581  11
  -3  18   1 699.364 141.787   9
  -3  18   0 93.3855 91.0255   9
  -3  18   0 63.9297 68.3060   8
  -3  18  -1 647.115 139.227   9
  -3  18  -1 668.985 142.604   8
  -3 -18   1 583.964 163.593   1
  -3  18  -2 436.692 124.052   9
  -3  18  -2 548.510 127.362   8
  -3 -18   2 637.571 174.351   1
   3  18   2 371.490 144.337  11
  -3  18  -3 2282.06 250.004   8
  -3 -18   3 2384.76 286.751   1
   3  18   3 2144.90 258.413  11
  -3  18  -3 2237.76 252.660   9
   3  18   4 106.972 89.6075  11
  -3  18  -4 103.450 84.3301   9
  -3  18  -4 270.069 108.521   8
  -3  18  -5 699.300 162.223   9
  -3  18  -5 971.705 168.775   8
  -3  18  -6 706.655 152.806   8
  -3  18  -6 814.612 171.475   9
  -3  18  -7 502.554 144.937   9
  -3  18  -7 588.710 146.449   8
  -3  18  -8 1694.01 255.894   9
   3  18   8 1355.81 249.730   7
  -3  18  -9 1686.54 262.742   9
   3  18   9 1215.16 253.961   7
  -3 -18  10 168.159 152.140   6
   3  18  10-36.8090 165.552  13
   3  18  11 370.370 264.705  13
  -3 -18  11 218.641 173.283   6
  -3 -18  12 177.653 146.984   6
   3  18  12 171.359 186.056  13
  -3 -18  13 185.240 175.850   6
   3  18  13 55.2280 125.258  13
   3  18  14 204.337 139.983  13
  -3 -18  14 295.117 143.177   6
  -3 -18  15 324.826 125.765   6
   3 -19  15 107.907 74.8437   3
   3 -19  14 354.541 135.126   3
   3 -19  13-54.2829 100.914   3
  -3  19  12 239.203 116.358   5
   3 -19  12 330.213 154.984   3
  -3  19  12 450.967 197.587  13
  -3  19  11 14.0891 103.860   5
  -3  19  11-62.9823 114.759  13
  -3  19  10 171.028 145.997   5
   3 -19  10 687.304 246.035   6
  -3  19  10 489.177 202.846  13
  -3  19   9 93.2119 138.699   5
   3 -19   9-54.1616 139.507   6
  -3  19   9-174.327 159.686  13
  -3  19   8 449.726 193.906   5
  -3  19   8 597.836 179.025   7
   3 -19   8 448.437 185.705   6
   3 -19   8 378.955 131.363   4
  -3  19   8 499.831 176.147  12
  -3  19   7 670.618 237.700   5
   3 -19   7 302.839 215.519   6
   3 -19   7 319.901 136.773   4
  -3  19   7 475.963 225.792  12
  -3  19   6 2740.29 444.795   5
   3 -19   6 2873.88 341.875   4
  -3  19   6 2491.19 368.663  12
  -3  19   5 1531.95 284.707  12
  -3  19   4 1705.30 297.041  12
  -3  19   4 1869.96 236.336  11
  -3  19   3 6568.54 441.173  11
  -3  19   2 255.198 111.359  11
  -3  19   1 1711.60 190.727   9
  -3  19   0 131.038 84.6345   8
  -3  19   0 93.3373 86.5941   9
  -3  19  -1 1786.17 215.910   9
  -3  19  -1 1865.78 229.999   8
  -3 -19   1 1861.91 295.945   1
  -3 -19   2 522.481 171.331   1
  -3  19  -2 335.946 111.042   8
  -3  19  -2 268.743 110.003   9
   3  19   2 176.093 126.095  11
  -3  19  -3 6327.91 416.060   8
  -3 -19   3 6722.13 497.319   1
  -3  19  -3 6635.70 426.648   9
   3  19   3 6158.29 436.018  11
  -3  19  -4 1782.06 235.494   9
  -3  19  -4 1845.91 228.320   8
   3  19   4 1448.30 229.634  11
  -3  19  -5 2156.97 259.166   8
  -3  19  -5 1728.03 233.265   9
  -3 -19   6 2492.81 266.898   2
  -3  19  -6 2786.65 297.535   8
  -3  19  -6 2942.58 318.628   9
  -3  19  -7 532.259 150.266   9
  -3  19  -7 527.937 136.165   8
  -3  19  -8 593.277 159.594   9
   3  19   8 274.562 142.993   7
  -3 -19   9-667.735 227.151   6
  -3 -19  10 42.5312 141.793   6
   3  19  10 240.457 198.705  13
  -3 -19  11 129.023 152.630   6
   3  19  11 70.1158 194.886  13
   3  19  12 614.919 263.851  13
  -3 -19  12 382.796 176.933   6
  -3 -19  13 119.849 140.866   6
   3  19  13 118.454 151.982  13
   3  19  14 225.360 158.354  13
  -3 -19  14 125.653 110.219   6
  -3 -19  15 90.3003 115.382   6
   3 -20  15 165.384 103.173   3
   3 -20  14 292.240 117.123   3
   3 -20  13-7.57955 96.9953   3
  -3  20  12 526.126 197.613   5
  -3  20  12 1090.13 270.861  13
   3 -20  12 599.028 208.426   3
  -3  20  11 872.474 245.312   5
  -3  20  11 1265.32 307.757  13
  -3  20  10 0.44200 103.385   5
  -3  20  10 220.234 180.133  13
  -3  20   9 1219.94 299.952   5
  -3  20   9 1982.72 377.749  13
  -3  20   8 3644.04 404.688   7
  -3 -20  -8 3978.74 519.504   1
   3 -20   8 3376.85 394.663   4
  -3  20   8 4297.62 529.159  12
  -3  20   8 4325.77 540.342   5
   3 -20   7 2589.37 342.620   4
  -3  20   7 2989.48 477.023   5
  -3  20   7 2636.25 414.734  12
  -3  20   6-48.1395 109.038  12
  -3  20   6 98.8636 142.381   5
   3 -20   6 275.107 157.284   4
   3 -20   5 668.999 170.709   2
  -3  20   5 463.327 221.418   5
   3 -20   5 314.907 166.017   4
  -3  20   5 220.225 118.730  12
  -3  20   4 268.472 98.3677  11
  -3  20   4 261.065 139.950  12
  -3  20   3 1625.99 230.097  11
  -3  20   2 4615.68 375.040  11
  -3  20   0 58.8871 96.2108   9
  -3 -20   0-21.3189 119.488   1
  -3  20  -1 200.191 114.743   9
  -3  20  -1 231.637 105.643   8
  -3 -20   1 319.193 185.229   1
   3  20   1 390.925 141.427  11
  -3 -20   2 4592.94 449.591   1
   3  20   2 4925.19 402.672  11
  -3  20  -2 4627.45 367.545   8
  -3  20  -2 4549.13 357.268   9
  -3  20  -3 1519.74 221.153   9
  -3  20  -3 1631.54 231.713   8
  -3 -20   3 1614.17 264.682   1
   3  20   3 1573.49 225.167  11
  -3  20  -4 146.286 110.902   9
  -3  20  -4 187.533 116.976   8
   3  20   4-63.8937 136.464  11
  -3 -20   5 628.165 145.961   2
  -3  20  -5 536.089 145.117   8
  -3  20  -5 500.431 153.030   9
  -3  20  -6-7.11775 89.0080   9
  -3  20  -6 160.389 103.853   8
  -3 -20   6-81.4431 115.876   2
  -3  20  -7 3015.42 307.223   8
  -3  20  -7 2940.99 321.645   9
   3  20   8 4019.07 441.465   7
  -3  20  -8 4363.01 413.893   9
  -3 -20  10 364.573 169.795   6
   3  20  10 65.8452 148.780  13
  -3 -20  11 704.666 248.363   6
   3  20  11 735.189 312.667  13
   3  20  12 439.407 192.064  13
  -3 -20  12 794.055 395.902   6
  -3 -20  13 46.6399 120.205   6
   3  20  13 4.77389 120.481  13
  -3 -20  14-88.9731 111.807   6
   3  20  14 91.8735 118.415  13
  -3 -20  15-19.2048 84.7963   6
   3 -21  15 111.116 76.5433   3
   3 -21  14 463.220 149.287   3
  -3  21  13-14.7548 63.9600   5
   3 -21  13-27.9345 107.843   3
  -3  21  12 399.729 156.075   5
  -3  21  12 458.387 197.805  13
   3 -21  12 148.000 105.354   3
  -3  21  11 656.910 204.739   5
  -3  21  11 1025.94 271.141  13
  -3  21  10 184.659 146.451   5
  -3  21  10 319.256 213.433  13
  -3  21   9 143.580 145.535   5
  -3  21   9 214.952 168.419  13
  -3 -21  -8 1877.36 381.742   1
  -3  21   8 1548.58 279.899   7
   3 -21   8 1571.93 272.539   4
  -3  21   8 2535.83 429.414   5
  -3 -21  -7 7285.26 695.961   1
   3 -21   7 6243.81 523.060   4
  -3  21   7 7120.35 696.427   5
  -3  21   7 5934.13 619.822  12
   3 -21   6 2759.87 355.752   4
  -3  21   6 2378.28 397.315  12
  -3  21   6 2638.06 433.112   5
  -3  21   5 1972.85 403.843   5
   3 -21   5 2742.99 350.921   4
   3 -21   5 2042.27 292.545   2
  -3  21   5 2590.13 390.420  12
  -3  21   4 5995.87 619.772   5
  -3  21   4 5930.02 563.200  12
   3 -21   4 5669.36 468.127   2
  -3  21   4 6467.96 481.487  11
  -3  21   3 2187.16 276.694  11
  -3  21   2 1157.89 208.079  11
  -3 -21  -1 1763.89 326.077   1
  -3  21   1 1676.90 248.797  11
  -3  21   0 922.365 171.200   9
  -3 -21   0 833.181 204.355   1
  -3  21  -1 1349.14 218.310   9
  -3 -21   1 1527.00 285.743   1
   3  21   1 1640.21 258.474  11
  -3  21  -2 818.501 173.209   9
  -3 -21   2 1187.31 230.880   1
  -3  21  -2 986.918 176.956   8
   3  21   2 1318.86 229.165  11
  -3  21  -3 2322.07 268.433   8
  -3 -21   3 2059.52 312.746   1
   3  21   3 1848.42 270.190  11
  -3  21  -3 2233.89 276.014   9
  -3  21  -4 6521.62 457.631   8
  -3 -21   4 6076.18 421.423   2
   3  21   4 6810.06 507.858  11
  -3  21  -4 6602.06 464.967   9
  -3  21  -5 2065.53 277.180   9
  -3  21  -5 2343.05 288.819   8
  -3 -21   5 1973.86 260.919   2
  -3 -21   6 2155.55 272.641   2
  -3  21  -6 2937.77 329.407   9
  -3 -21   7 5549.34 422.932   2
  -3  21  -7 6569.75 495.072   9
   3  21   8 1743.60 307.079   7
  -3 -21  10 6.81143 133.091   6
   3  21  10 274.487 215.742  13
  -3 -21  11 618.991 204.490   6
   3  21  11 1080.03 320.574  13
  -3 -21  12 299.905 173.324   6
   3  21  12 373.864 214.598  13
  -3 -21  13-35.0206 105.359   6
   3  21  13 93.4350 113.489  13
  -3 -21  14 61.0660 82.7458   6
   3  21  14 291.174 135.135  13
   3 -22  14 691.427 171.501   3
  -3  22  13 220.850 115.747   5
   3 -22  13 40.0399 97.4864   3
  -3  22  12 165.560 115.516   5
   3 -22  12 67.2661 97.8169   3
  -3  22  11 575.198 214.444   5
  -3  22  11 1160.73 263.993  13
  -3  22  10 131.625 135.886  13
  -3  22  10 129.071 130.262   5
  -3  22   9 1281.87 305.465   5
  -3  22   9 999.246 299.671  13
  -3  22   8 1361.45 313.379   5
   3 -22   8 1371.53 254.696   4
  -3 -22  -7 8064.07 759.727   1
  -3  22   7 7523.26 708.320   5
   3 -22   7 7256.86 569.710   4
  -3  22   7 7386.07 698.317  12
  -3 -22  -6 6773.25 678.041   1
   3 -22   6 6865.00 558.320   4
  -3  22   6 5796.50 606.119  12
  -3  22   6 6322.92 658.426   5
   3 -22   5 1372.53 251.671   2
  -3  22   5 1858.81 350.735   5
  -3 -22  -5 972.326 270.293   1
   3 -22   5 1299.46 249.920   4
  -3  22   5 1448.23 301.130  12
  -3  22   4 183.125 148.844   5
   3 -22   4 20.7043 106.219   2
  -3 -22  -4-10.3289 173.508   1
  -3  22   4-59.3020 99.9190  12
  -3  22   4-112.001 159.272  11
  -3 -22  -4-79.2646 82.4842   2
   3 -22   3 335.987 143.797   2
  -3  22   3 154.256 141.401   5
  -3 -22  -3 166.700 150.350   1
  -3  22   3 178.683 110.210  11
  -3 -22  -2 3757.08 469.913   1
  -3  22   2 3920.29 376.039  11
  -3 -22  -1 478.832 191.995   1
  -3  22   1 593.439 160.751  11
  -3 -22   0 1115.47 245.834   1
  -3  22  -1 633.983 159.381   9
  -3 -22   1 606.215 191.387   1
   3  22   1 506.414 165.659  11
  -3 -22   2 3783.23 432.697   1
   3  22   2 4594.22 408.034  11
  -3 -22   2 4006.72 338.562   2
  -3  22  -2 4271.32 366.771   9
  -3  22  -3 285.835 121.955   9
  -3  22  -3 503.943 154.814   8
  -3 -22   3 296.691 117.174   2
   3  22   3 69.8566 110.704  11
  -3  22  -4 3.79414 102.334   9
  -3  22  -4 15.6630 85.6776   8
  -3 -22   4 129.156 106.566   2
   3  22   4 67.5533 97.1573  11
  -3  22  -5 1404.15 238.452   9
  -3  22  -5 1098.24 193.326   8
  -3 -22   5 1272.43 209.024   2
  -3  22  -6 6391.60 458.079   8
  -3 -22   6 5768.11 435.047   2
  -3  22  -6 6224.73 474.228   9
  -3 -22   7 7145.35 490.982   2
   3  22  10 41.2232 180.972  13
  -3 -22  11 914.205 244.942   6
   3  22  11 1468.36 362.212  13
  -3 -22  12 263.533 155.239   6
   3  22  12 314.874 204.790  13
  -3 -22  13 35.5831 103.798   6
   3  22  13 312.646 156.725  13
   3  22  14 676.475 202.798  13
  -3 -22  14 294.611 129.851   6
   3 -23  14-12.2837 74.7216   3
  -3  23  13-77.3421 73.7504   5
   3 -23  13 96.6744 96.4259   3
  -3  23  12 260.344 118.321   5
  -3  23  12 572.555 209.595  13
   3 -23  12 235.019 153.719   3
  -3  23  11 1.11635 101.952   5
  -3  23  11-152.367 123.723  13
  -3  23  10 152.411 144.463   5
  -3  23  10 247.970 116.502  13
  -3  23   9 201.872 134.982   5
  -3  23   8 2038.30 393.262   5
   3 -23   8 2078.45 308.765   4
  -3  23   7 1053.96 282.751   5
   3 -23   7 885.141 206.951   4
  -3 -23  -6 5859.08 645.789   1
   3 -23   6 6068.26 525.165   4
  -3  23   6 6270.35 657.148   5
  -3  23   6 5227.92 579.175  12
  -3 -23  -5 6605.77 663.592   1
  -3  23   5 6658.61 671.777   5
  -3  23   5 5501.35 582.796  12
   3 -23   5 5177.77 460.672   2
   3 -23   5 5774.27 511.217   4
   3 -23   4 1174.94 219.456   2
  -3  23   4 1289.49 295.101   5
  -3 -23  -4 1815.21 353.369   1
  -3  23   4 1103.89 281.020  12
  -3 -23  -4 1025.29 188.566   2
  -3  23   4 1321.06 248.657  11
   3 -23   3 1091.73 215.641   2
  -3  23   3 933.297 258.227   5
  -3 -23  -3 1130.24 264.291   1
  -3 -23  -3 989.034 182.971   2
  -3  23   3 1340.26 231.224  11
  -3  23   2 292.045 173.666   5
  -3 -23  -2 423.034 125.008   2
   3 -23   2 437.268 148.553   2
  -3 -23  -2 466.473 209.229   1
  -3  23   2 227.330 146.711  11
   3 -23   1 473.840 138.483   2
  -3  23   1 488.704 158.757  11
  -3 -23  -1 498.391 140.996   2
  -3 -23   0 202.144 86.8444   2
  -3 -23   0 220.610 168.014   1
  -3 -23   1 732.389 248.671   1
  -3 -23   1 525.203 132.303   2
   3  23   1 840.846 193.738  11
  -3 -23   2 515.161 151.435   2
   3  23   2 440.069 156.884  11
  -3 -23   2 275.078 156.718   1
  -3  23  -3 1645.08 262.672   9
  -3 -23   3 1026.52 195.201   2
   3  23   3 1273.49 237.169  11
  -3  23  -4 1494.48 246.151   9
  -3  23  -4 1346.03 224.403   8
  -3 -23   4 1256.83 215.748   2
   3  23   4 1338.87 259.011  11
  -3  23  -5 5950.41 452.062   8
  -3 -23   5 5729.75 441.728   2
  -3  23  -5 5974.93 475.775   9
  -3  23  -6 6191.47 459.125   8
  -3 -23   6 5599.51 444.195   2
  -3 -23   7 995.079 205.876   2
   3  23  10 199.302 157.178  13
   3  23  11 104.177 191.764  13
   3  23  12 514.885 211.617  13
   3  23  13 4.38939 121.045  13
   3  23  14 107.454 108.662  13
   3 -24  14 35.2639 66.8988   3
  -3  24  13 491.287 123.760   5
   3 -24  13 540.115 156.731   3
  -3  24  12 204.541 103.652   5
   3 -24  12 280.309 150.577   3
  -3  24  11 171.633 133.400   5
  -3  24  11 639.112 174.518  13
  -3  24  10 815.760 252.190   5
  -3  24   9 136.485 136.724   5
   3 -24   8 108.946 120.665   4
  -3  24   8 329.250 184.582   5
  -3  24   7 2241.74 400.592   5
   3 -24   7 2235.87 326.799   4
  -3  24   6 164.251 146.363   5
   3 -24   6-2.30298 140.667   4
  -3  24   6-23.3109 157.017  12
  -3  24   5 367.053 162.654   5
  -3 -24  -5 168.610 169.326   1
   3 -24   5 60.2384 129.078   4
  -3  24   5 469.363 199.035  12
   3 -24   5 102.929 118.410   2
   3 -24   4 710.996 190.609   2
  -3  24   4 1125.52 305.006   5
  -3 -24  -4 879.369 289.166   1
  -3  24   4 973.080 264.595  12
  -3 -24  -4 972.296 170.716   2
  -3  24   4 1276.56 236.298  11
   3 -24   3 500.813 182.405   2
  -3 -24  -3 440.991 139.820   2
  -3  24   3 486.021 238.239   5
  -3 -24  -3 475.652 214.477   1
  -3  24   3 978.346 228.370  11
  -3 -24  -2 3858.58 507.484   1
  -3  24   2 2887.88 457.012   5
   3 -24   2 3423.84 376.739   2
  -3  24   2 4403.62 413.288  11
  -3 -24  -2 3477.49 329.956   2
  -3 -24  -1 1092.05 286.813   1
   3 -24   1 900.993 214.513   2
  -3  24   1 508.808 214.616   5
  -3  24   1 799.499 192.886  11
  -3 -24  -1 735.756 173.533   2
   3 -24   0 3330.97 351.078   2
  -3 -24   0 3566.66 337.743   2
  -3 -24   0 3595.90 477.717   1
   3 -24  -1 772.271 198.886   2
  -3 -24   1 588.066 149.876   2
   3  24   1 1183.09 238.181  11
  -3 -24   1 965.420 228.529   1
  -3 -24   2 3112.54 427.270   1
   3  24   2 3946.98 405.844  11
  -3 -24   2 3486.39 337.280   2
  -3 -24   3 365.837 110.008   2
   3  24   3 424.564 174.890  11
   3  24   4 979.354 234.257  11
  -3 -24   4 777.412 175.804   2
  -3 -24   5 310.180 131.416   2
  -3 -24   6 154.393 132.673   2
  -3 -24   7 1643.91 256.942   2
  -3 -24   8 195.861 146.219   2
   3  24  10 1111.66 358.749  13
   3  24  11 548.166 230.203  13
   3  24  12 321.768 179.665  13
   3  24  13 819.049 232.098  13
   3  24  14 184.547 109.588  13
   3 -25  14-7.72937 50.4957   3
   3 -25  13-43.4048 78.7029   3
  -3  25  13 204.836 85.8966   5
  -3  25  12 278.167 124.508   5
   3 -25  12 144.032 112.733   3
  -3  25  11 161.203 121.615   5
  -3  25  10 266.667 139.232   5
  -3  25   9 2238.68 398.644   5
  -3  25   8 586.718 238.509   5
   3 -25   8 736.836 214.649   4
  -3  25   7 332.068 189.373   5
   3 -25   7 269.097 146.604   4
  -3  25   6-51.0851 123.599   5
   3 -25   6 105.537 135.618   4
  -3 -25  -5 692.035 250.283   1
  -3  25   5 884.442 263.999   5
   3 -25   5 653.734 207.002   4
  -3  25   5 626.639 182.882  12
   3 -25   5 385.308 144.935   2
   3 -25   4 1761.37 281.227   2
  -3 -25  -4 2049.45 393.050   1
  -3  25   4 1997.54 389.716   5
  -3 -25  -4 1558.40 230.114   2
  -3  25   4 1790.64 365.957  12
  -3  25   4 1798.71 292.217  11
   3 -25   3 161.871 120.465   2
  -3 -25  -3-92.5245 146.029   1
  -3 -25  -3 193.861 126.308   2
  -3  25   3 142.869 153.750   5
  -3  25   3 300.778 149.007  11
   3 -25   2 722.372 202.755   2
  -3  25   2 676.420 230.237   5
  -3 -25  -2 642.969 154.059   2
  -3 -25  -2 836.597 233.671   1
  -3  25   2 594.369 171.836  11
  -3 -25  -1 107.843 93.0376   2
   3 -25   1 53.2698 108.662   2
  -3  25   1 68.9989 99.0013   5
  -3 -25  -1 282.384 196.819   1
  -3  25   1-38.8579 131.197  11
  -3 -25   0 4179.72 371.361   2
  -3 -25   0 4251.38 531.327   1
  -3  25   0 5027.44 455.120  11
   3  25   0 4899.13 457.027  11
   3 -25   0 3209.55 358.190   2
   3 -25  -1 214.207 125.163   2
   3  25   1-91.0765 122.770  11
  -3 -25   1-30.4987 100.201   2
  -3 -25   1-92.0411 152.151   1
  -3 -25   2 682.344 210.951   1
  -3 -25   2 548.145 160.651   2
   3  25   2 977.078 236.692  11
  -3 -25   3-78.4293 132.373   2
   3  25   3 63.9889 114.864  11
  -3 -25   4 1638.24 240.180   2
  -3 -25   5 896.597 189.727   2
  -3 -25   6 58.8606 129.230   2
  -3 -25   7 404.557 142.259   2
  -3 -25   8 345.815 124.274   2
   3  25   9 1823.91 392.078  13
   3  25  10 86.8496 123.420  13
   3  25  11 180.551 131.908   5
   3  25  11 20.3297 119.824  13
   3  25  12 609.954 234.226  13
   3  25  13 232.989 135.928  13
   3  25  14 384.911 132.942  13
   3 -26  14 311.861 90.4202   3
   3 -26  13 355.190 116.495   3
  -3  26  13 378.290 109.070   5
  -3  26  12 253.612 110.146   5
   3 -26  12-65.1494 92.3344   3
  -3  26  11-24.2932 103.132   5
  -3  26  10 115.162 118.229   5
  -3  26   9 387.478 200.817   5
  -3  26   8 18.2509 111.780   5
   3 -26   8 22.7874 114.640   4
  -3  26   7 608.697 223.341   5
   3 -26   7 699.974 203.798   4
   3 -26   6 4914.06 489.931   4
  -3  26   6 4520.28 560.298   5
   3 -26   5 11288.2 745.271   4
  -3  26   5 10418.8 838.831   5
   3 -26   5 9013.08 625.613   2
   3 -26   4 607.042 209.757   2
  -3  26   4 573.324 237.808   5
  -3 -26  -4 587.450 173.740   2
  -3 -26  -4 500.460 236.476   1
  -3  26   4 653.785 222.579  12
  -3  26   3 133.313 127.240   5
   3 -26   3 310.947 180.536   2
  -3 -26  -3 219.150 117.970   2
  -3 -26  -3 244.395 236.254   1
  -3  26   3 170.088 149.168  12
  -3  26   3 210.332 129.802  11
   3 -26   2 724.464 194.036   2
  -3 -26  -2 673.662 168.472   2
  -3  26   2 413.517 206.966   5
  -3 -26  -2 808.239 268.720   1
  -3  26   2 568.736 173.658  11
   3 -26   1 821.424 210.819   2
  -3  26   1 669.957 193.786  11
  -3  26   1 688.321 233.737   5
  -3 -26  -1 682.615 252.780   1
  -3 -26  -1 620.740 180.826   2
  -3 -26   0 344.347 197.429   1
   3 -26   0 246.173 152.153   2
  -3 -26   0 307.262 130.643   2
  -3  26   0 233.004 150.409  11
   3  26   0 237.931 184.335  11
   3 -26  -1 543.655 163.084   2
  -3 -26   1 671.832 167.591   2
  -3 -26   1 819.085 249.380   1
   3  26   1 1247.40 258.867  11
  -3 -26   2 519.705 161.421   2
   3  26   2 508.780 171.116  11
  -3 -26   3 251.426 120.115   2
   3  26   3 230.979 129.239  11
  -3 -26   4 536.566 169.093   2
  -3 -26   5 10422.9 624.492   2
  -3 -26   6 5010.34 427.529   2
  -3 -26   7 408.161 139.253   2
  -3 -26   8 76.7377 89.1566   2
   3  26   9 486.201 229.848  13
   3  26  10 47.6002 162.567  13
   3  26  11 10.5372 87.2011   5
   3  26  11 218.676 157.302  13
   3  26  12 273.841 165.004  13
   3  26  13 521.156 165.150  13
   3 -27  13 213.714 85.3613   3
  -3  27  12 452.247 128.348   5
   3 -27  12 176.671 87.4774   3
  -3  27  11 659.141 186.325   5
  -3  27  10 156.510 120.594   5
  -3  27   9 143.495 135.325   5
  -3  27   8 243.073 173.194   5
   3 -27   8 164.181 151.165   4
  -3  27   7 1365.88 320.406   5
   3 -27   7 1007.07 230.151   4
   3 -27   6 4040.94 445.791   4
  -3  27   6 4022.75 532.398   5
  -3  27   5 2504.63 423.147   5
   3 -27   5 2580.69 365.624   4
  -3  27   4 925.482 264.623   5
  -3 -27  -4 1530.71 240.902   2
   3 -27   4 1312.72 269.197   2
   3 -27   3-118.564 161.501   2
  -3  27   3-80.4626 101.679   5
  -3 -27  -3 67.3275 95.7371   2
  -3  27   3-115.997 169.021  11
  -3 -27  -2 552.196 266.916   1
  -3  27   2 588.624 215.805   5
  -3 -27  -2 809.732 203.449   2
   3 -27   2 564.615 203.578   2
  -3  27   2 682.221 204.715  11
  -3  27   1 3256.55 450.373   5
  -3 -27  -1 4230.49 562.709   1
   3 -27   1 3518.95 393.869   2
  -3  27   1 4439.92 447.409  11
  -3 -27  -1 4387.90 396.435   2
   3 -27   0 323.202 171.920   2
  -3 -27   0 239.585 146.347   2
  -3 -27   0 51.7916 179.082   1
  -3  27   0 267.861 159.967  11
   3  27   0 201.538 113.655  11
  -3 -27   1 3716.87 520.350   1
   3 -27  -1 3572.17 377.822   2
   3  27   1 4663.77 460.352  11
  -3 -27   1 4221.75 405.848   2
  -3 -27   2 497.665 156.086   2
   3  27   2 230.897 141.309  11
  -3 -27   3 161.498 134.574   2
   3  27   3-323.040 179.822  11
  -3 -27   4 1668.80 275.662   2
  -3 -27   5 2626.30 328.699   2
  -3 -27   6 3460.51 371.437   2
  -3 -27   7 1030.15 206.966   2
  -3 -27   8 191.822 112.995   2
   3  27   9 375.234 211.758  13
   3  27  10 313.113 173.966  13
   3  27  11 373.814 147.927   5
   3  27  11 930.607 261.716  13
   3  27  12 501.110 186.120  13
   3  27  13 312.208 132.477  13
   3 -28  13 14.0871 49.8963   3
  -3  28  12 258.579 98.6244   5
   3 -28  12 54.0074 63.2082   3
  -3  28  11-21.0821 69.5481   5
  -3  28  10 22.8236 84.7604   5
  -3  28   9 84.8299 106.843   5
  -3  28   8 379.034 180.585   5
   3 -28   8 433.834 164.493   4
  -3  28   7 108.654 141.354   5
   3 -28   7 350.273 164.695   4
   3 -28   6 2268.71 344.866   4
  -3  28   6 2864.40 448.767   5
  -3  28   5 2003.45 384.001   5
   3 -28   5 1620.60 301.704   4
  -3  28   4-59.0355 128.704   5
  -3 -28  -4-95.8195 123.240   2
   3 -28   4-158.078 162.257   2
   3 -28   3-119.388 156.072   2
  -3  28   3-36.0521 115.282   5
  -3 -28  -3 145.347 117.342   2
   3 -28   2 1102.38 247.518   2
  -3  28   2 1364.09 302.095   5
  -3 -28  -2 1270.76 225.224   2
   3 -28   1 757.899 206.799   2
  -3  28   1 577.993 213.980   5
  -3 -28  -1 762.943 181.494   2
  -3  28   1 928.588 217.093  11
   3  28  -1 803.405 211.705  11
   3 -28   0 3116.79 362.650   2
  -3  28   0 4190.41 453.708  11
   3  28   0 3905.79 430.336  11
  -3 -28   0 3815.84 381.840   2
   3 -28  -1 516.216 176.155   2
  -3 -28   1 527.024 161.705   2
  -3  28  -1 918.604 252.915  11
   3  28   1 597.275 180.785  11
  -3 -28   2 927.767 214.694   2
  -3 -28   3 134.258 113.789   2
  -3 -28   4-41.5432 103.251   2
  -3 -28   5 1790.53 271.293   2
  -3 -28   6 2443.40 322.003   2
  -3 -28   7 148.051 128.172   2
  -3 -28   8 59.6757 90.4427   2
   3  28   9 607.992 250.218  13
   3  28  10 43.1833 89.9196   5
   3  28  10 144.362 125.583  13
   3  28  11 137.263 109.833   5
   3  28  11 57.8239 111.834  13
   3  28  12 352.998 166.328  13
   3  28  13 105.702 83.9344  13
   3 -29  13 71.9355 52.5165   3
  -3  29  12 355.493 102.818   5
   3 -29  12 163.737 87.0483   3
  -3  29  11-78.8480 77.6176   5
  -3  29  10 178.667 118.372   5
  -3  29   9 232.950 155.108   5
  -3  29   8 353.573 181.784   5
   3 -29   8 636.747 201.167   4
  -3  29   7 756.518 249.794   5
   3 -29   7 439.160 163.570   4
  -3  29   6 453.113 205.244   5
   3 -29   6 507.224 169.207   4
  -3  29   5 352.297 170.927   5
   3 -29   5 335.439 149.415   4
  -3  29   4 291.221 144.733   5
  -3 -29  -4 284.233 135.975   2
  -3  29   3 407.752 159.594   5
  -3 -29  -3 298.587 148.838   2
   3 -29   3 140.894 123.461   2
   3 -29   2 217.041 136.504   2
  -3  29   2 141.363 169.637   5
  -3 -29  -2 258.474 120.785   2
  -3  29   1 502.623 191.137   5
  -3 -29  -1 722.396 197.391   2
   3 -29   1 993.875 218.616   2
  -3 -29   0 148.901 129.339   2
   3 -29   0 210.107 137.026   2
  -3 -29   1 495.346 157.871   2
   3 -29  -1 330.499 109.342   2
  -3 -29   2-67.9046 138.675   2
  -3 -29   3 736.642 213.223   2
  -3 -29   4 589.218 186.901   2
  -3 -29   5 512.391 148.299   2
  -3 -29   6 433.955 138.666   2
  -3 -29   7 639.646 179.565   2
  -3 -29   8 394.265 141.646   2
   3  29   9 725.349 235.324  13
   3  29  10 364.727 143.819   5
   3  29  10 27.7628 121.884  13
   3  29  11 61.4404 106.712   5
   3  29  11 0.33600 112.148  13
   3  29  12 505.115 158.774  13
   3 -30  12 39.5235 62.4682   3
  -3  30  11 17.3254 60.9902   5
   3 -30  11 8.40976 63.1733   3
  -3  30  10-28.3987 70.7261   5
  -3  30   9 271.642 143.175   5
   3 -30   8 63.4714 117.711   4
  -3  30   8 103.584 130.308   5
  -3  30   7 196.154 171.279   5
   3 -30   7 360.990 156.732   4
  -3  30   6 599.934 239.283   5
   3 -30   6 622.703 193.838   4
  -3  30   5 172.930 148.882   5
   3 -30   5 470.347 180.422   4
  -3  30   4 940.673 272.551   5
  -3 -30  -4 719.936 172.782   2
   3 -30   4 844.392 221.548   4
  -3 -30  -3 105.284 107.849   2
  -3  30   3 179.937 156.203   5
   3 -30   3-110.096 137.656   2
  -3  30   2 1257.16 301.944   5
  -3 -30  -2 1570.16 259.439   2
   3 -30   2 1354.00 258.353   2
  -3  30   1 2339.57 389.979   5
  -3 -30  -1 2420.87 311.384   2
   3 -30   1 2073.78 309.781   2
  -3 -30   0 766.913 203.189   2
   3 -30   0 786.556 198.623   2
  -3 -30   1 3030.57 351.886   2
   3 -30  -1 1915.85 271.636   2
  -3 -30   2 1653.52 265.188   2
  -3 -30   3 109.756 106.272   2
  -3 -30   4 985.834 238.098   2
  -3 -30   5 559.501 179.778   2
  -3 -30   6 628.089 184.841   2
  -3 -30   7 441.355 151.348   2
  -3 -30   8-47.6868 79.4832   2
   3  30   9 159.855 139.025  13
   3  30  10 243.390 126.041  13
   3  30  10 142.886 120.567   5
   3  30  11 279.842 116.354   5
   3  30  11 449.221 161.149  13
   3  30  12 200.494 119.120  13
   3 -31  12-8.19343 47.6369   3
  -3  31  11 43.6340 61.0337   5
   3 -31  11 93.1474 70.4180   3
  -3  31  10 349.617 140.498   5
  -3  31   9-99.4175 92.8861   5
   3 -31   8 263.242 120.141   4
  -3  31   8 188.734 152.764   5
  -3  31   7 169.250 139.307   5
   3 -31   7 188.568 139.565   4
  -3  31   6 245.206 160.908   5
   3 -31   6 157.341 105.296   4
  -3  31   5 593.785 212.638   5
   3 -31   5 898.559 231.047   4
  -3  31   4 289.586 168.997   5
  -3 -31  -4 200.956 130.765   2
  -3  31   3 27.2905 137.837   5
  -3 -31  -3-29.0875 98.0070   2
  -3  31   2 2258.69 382.352   5
  -3 -31  -2 2370.60 309.347   2
  -3  31   1 1900.82 338.361   5
  -3 -31  -1 2671.59 329.967   2
   3 -31   1 1893.97 292.150   2
  -3 -31   0 339.328 139.507   2
   3 -31   0 33.3566 98.1168   2
  -3 -31   1 2937.32 347.026   2
  -3 -31   2 3598.34 388.940   2
  -3 -31   3 90.6912 125.067   2
  -3 -31   4 162.796 110.535   2
  -3 -31   5 616.123 189.190   2
  -3 -31   6 219.496 137.384   2
  -3 -31   7 258.611 131.608   2
  -3 -31   8 260.765 112.142   2
   3  31   9-23.9053 91.5422   5
   3  31   9-284.262 158.922  13
   3  31  10 287.735 124.254   5
   3  31  10 335.797 162.743  13
   3  31  11 138.040 100.533  13
   3  31  12 276.247 104.751  13
  -3  32  11-39.9133 62.5609   5
   3 -32  11-62.0503 65.8253   3
  -3  32  10 209.626 102.295   5
  -3  32   9 142.142 114.350   5
  -3  32   8 145.882 119.666   5
   3 -32   7 17.5514 101.018   4
  -3  32   7-63.0642 90.9389   5
  -3  32   6-114.014 110.347   5
   3 -32   6 75.9198 106.606   4
  -3  32   5 316.149 188.252   5
   3 -32   5 833.117 222.285   4
  -3 -32  -4 272.358 121.399   2
  -3  32   4 448.112 196.681   5
   3 -32   4 451.938 166.221   4
  -3  32   3 378.310 174.261   5
  -3 -32  -3 436.739 153.353   2
  -3  32   2 134.881 113.937   5
  -3 -32  -2 28.7979 88.3426   2
  -3  32   1 34.5528 122.808   5
  -3 -32  -1 424.778 148.766   2
  -3 -32   0 880.981 202.390   2
  -3 -32   1 161.676 121.051   2
  -3 -32   2-220.379 142.563   2
  -3 -32   3 311.788 120.197   2
  -3 -32   4 459.629 153.386   2
  -3 -32   5 369.075 130.261   2
  -3 -32   6 181.456 114.910   2
  -3 -32   7 81.5418 114.974   2
  -3 -32   8-8.72890 79.2310   2
   3  32   8 205.887 172.459  13
   3  32   9 41.7546 73.1226   5
   3  32   9 68.3393 95.3497  13
   3  32  10 153.586 96.6939   5
   3  32  10 45.7212 105.809  13
   3  32  11 218.552 119.922  13
   3 -33  11-46.3298 56.4766   3
  -3  33  10 84.1917 69.0111   5
  -3  33   9 151.927 93.6567   5
  -3  33   8 284.570 143.429   5
  -3  33   7-60.1779 87.9131   5
   3 -33   7-112.311 88.3890   4
  -3  33   6-22.1239 108.028   5
   3 -33   6 128.938 108.453   4
  -3  33   5-87.5412 107.409   5
   3 -33   5 125.624 145.689   4
  -3  33   4 162.569 143.639   5
  -3 -33  -4 26.3226 95.8118   2
   3 -33   4-12.4502 128.825   4
  -3 -33  -3 384.336 146.157   2
  -3  33   3 298.077 151.019   5
  -3 -33  -2 875.872 201.821   2
  -3  33   2 565.246 202.805   5
  -3 -33  -1 319.157 132.320   2
  -3 -33   0-42.6314 144.186   2
  -3 -33   1 220.460 109.308   2
  -3 -33   2 683.025 178.689   2
  -3 -33   3 85.0536 119.044   2
  -3 -33   4-66.5999 99.8730   2
  -3 -33   5 16.2151 104.630   2
  -3 -33   6 119.776 92.2673   2
  -3 -33   7-33.5571 76.5357   2
  -3 -33   8 166.691 93.0476   2
   3  33   8 418.783 169.448  13
   3  33   9 233.923 150.484   5
   3  33   9 240.819 150.400  13
   3  33  10 35.1726 65.4424   5
   3  33  10-55.9825 105.108  13
   3  33  11 212.449 106.008  13
  -3  34  10 213.839 76.7453   5
   3 -34  10 70.4049 50.1423   3
  -3  34   9 194.579 98.3716   5
  -3  34   8-167.709 98.3776   5
  -3  34   7 335.383 137.410   5
   3 -34   7 112.860 93.3241   4
   3 -34   6 91.8278 115.506   4
  -3  34   6-65.7156 101.850   5
  -3  34   5 39.9693 79.7156   5
   3 -34   5 288.729 156.627   4
  -3  34   4 173.554 140.430   5
   3 -34   4-27.1371 118.810   4
  -3  34   3 230.066 127.302   5
  -3 -34  -3 355.185 128.320   2
   3 -34   3 220.660 139.925   4
  -3  34   2 33.0945 97.5457   5
  -3 -34  -2-15.1065 104.655   2
  -3 -34  -1 438.404 156.553   2
  -3 -34   0-137.500 127.251   2
  -3 -34   1 434.227 124.402   2
  -3 -34   2-237.844 175.880   2
  -3 -34   3 5.75567 120.813   2
  -3 -34   4 7.53199 105.802   2
  -3 -34   5 240.367 126.052   2
  -3 -34   6 66.6096 83.0880   2
  -3 -34   7 59.6399 72.3461   2
   3  34   8 37.4958 78.7573   5
   3  34   8 39.3833 95.2608  13
  -3 -34   8-97.2446 71.1663   2
   3  34   9 84.2733 90.9371   5
   3  34   9 187.052 126.385  13
   3  34  10 208.482 115.335  13
  -3  35   9 134.069 83.4503   5
  -3  35   8 449.276 135.348   5
  -3  35   7 397.699 145.920   5
   3 -35   7 485.708 141.678   4
  -3  35   6 58.9100 92.4717   5
   3 -35   6 108.277 85.8388   4
  -3  35   5 40.0533 73.9129   5
   3 -35   5 23.6928 87.8335   4
  -3  35   4 8.36436 80.8196   5
   3 -35   4 244.536 144.297   4
  -3 -35  -3 116.822 102.691   2
   3 -35   3 56.2753 116.601   4
  -3  35   3-10.5068 90.9259   5
  -3 -35  -2 360.308 132.623   2
  -3  35   2 324.998 148.688   5
  -3 -35  -1 59.7250 119.013   2
  -3 -35   0-77.8314 126.020   2
  -3 -35   1-19.8365 103.942   2
  -3 -35   2 390.067 144.690   2
  -3 -35   3 38.6894 94.8231   2
  -3 -35   4-132.822 100.283   2
  -3 -35   5-11.6865 91.8585   2
  -3 -35   6 81.0985 84.6270   2
  -3 -35   7 299.643 106.010   2
   3  35   8 377.701 147.346   5
   3  35   8 352.942 153.705  13
   3  35   9 248.729 104.220   5
   3  35   9 235.642 123.331  13
  -3  36   9 137.639 77.7528   5
  -3  36   8 306.204 112.903   5
  -3  36   7-52.7829 81.1798   5
   3 -36   6 473.251 132.254   4
  -3  36   6 666.302 171.111   5
  -3  36   5 553.269 172.290   5
   3 -36   5 468.935 144.943   4
  -3  36   4 137.118 98.8366   5
   3 -36   4-107.439 101.431   4
  -3 -36  -3 124.896 104.529   2
   3 -36   3-84.0505 121.278   4
  -3  36   3 65.3707 93.8435   5
  -3  36   2 165.157 77.1723   5
  -3 -36  -2 178.391 116.197   2
   3 -36   2-130.629 105.546   4
  -3 -36  -1 296.866 116.572   2
  -3 -36   0 522.092 144.079   2
  -3 -36   1 25.0319 88.8417   2
  -3 -36   2 33.3395 112.120   2
  -3 -36   3 122.119 85.4811   2
  -3 -36   4 37.4404 83.9182   2
  -3 -36   5 543.053 138.756   2
  -3 -36   6 549.865 132.023   2
   3  36   7-29.8533 77.6738   5
   3  36   7-94.7318 89.7625  13
  -3 -36   7-5.00474 62.0396   2
   3  36   8 206.205 107.737   5
   3  36   8 212.869 103.746  13
   3  36   9 82.7159 78.8965  13
  -3  37   8-62.5702 60.1099   5
  -3  37   7-72.1744 76.5247   5
  -3  37   6 400.098 133.763   5
   3 -37   6 80.7866 77.8631   4
  -3  37   5 27.9610 64.5979   5
   3 -37   5 111.479 69.3465   4
  -3  37   4 10.7421 76.1721   5
   3 -37   4-118.929 118.665   4
  -3 -37  -3 371.928 123.022   2
  -3  37   3 421.387 142.108   5
  -3 -37  -2 17.7826 84.9180   2
   3 -37   2 421.201 159.038   4
  -3 -37  -1 488.742 139.320   2
  -3 -37   0 3.44871 86.9984   2
  -3 -37   1 608.682 154.248   2
  -3 -37   2 142.479 85.8249   2
  -3 -37   3 366.568 122.243   2
  -3 -37   4 215.772 116.504   2
  -3 -37   5-86.1748 68.9040   2
  -3 -37   6 107.218 88.4643   2
   3  37   6 137.343 100.245   5
   3  37   7-22.9156 68.0834   5
   3  37   7 32.9636 87.5718  13
   3  37   8 175.047 83.9833   5
   3  37   8 104.687 84.4057  13
  -3  38   7 258.745 90.8564   5
  -3  38   6-92.3054 67.2231   5
  -3  38   5-11.6697 55.4087   5
   3 -38   5 165.131 99.7538   4
   3 -38   4 258.722 110.368   4
  -3  38   4 289.768 110.466   5
  -3  38   3 34.7438 77.6514   5
   3 -38   3 44.2422 75.0516   4
  -3 -38  -2 344.628 107.819   2
   3 -38   2 175.302 126.152   4
  -3 -38  -1-34.5540 67.6191   2
   3 -38   1-128.932 105.927   4
  -3 -38   0 156.886 90.6105   2
  -3 -38   1 87.6245 102.961   2
  -3 -38   2 347.190 123.898   2
  -3 -38   3 224.489 113.600   2
  -3 -38   4 144.741 77.2830   2
  -3 -38   5 27.3351 60.6632   2
   3  38   5 104.974 90.6070   5
   3  38   6 149.829 105.243   5
   3  38   6-0.48398 79.3047  13
  -3 -38   6 7.74498 56.9970   2
   3  38   7 265.748 98.3416   5
   3  38   7 380.261 122.169  13
   3 -39   5 57.7981 57.6352   4
  -3  39   5-123.517 68.4920   5
  -3  39   4 80.0638 73.7173   5
   3 -39   4-41.1881 71.0933   4
   3 -39   3 171.597 97.6115   4
   3 -39   2 128.418 99.8912   4
  -3 -39  -2 400.132 101.631   2
  -3 -39  -1 72.6726 70.1513   2
   3 -39   1 222.303 119.570   4
  -3 -39   0 66.5043 68.3447   2
   3 -39   0-51.6013 80.8846   4
  -3 -39   1 130.101 83.2711   2
  -3 -39   2 311.597 108.500   2
  -3 -39   3-28.9347 74.7581   2
  -3 -39   4-9.15335 61.8300   2
   3  39   4 18.9903 64.4823   5
   3  39   5 18.9682 53.1915   5
  -3 -39   5 89.0776 54.1822   2
   3  39   6 72.1675 73.6688   5
   3  39   6-74.6642 90.3548  13
   3 -40   4 106.686 69.4979   4
   3 -40   3 18.6053 55.4596   4
   3 -40   2 226.693 98.1986   4
  -3 -40  -1 39.4179 52.7861   2
   3 -40   1 82.2583 69.2200   4
  -3 -40   0 155.862 71.5763   2
   3 -40   0 55.2308 77.2714   4
  -3 -40   1 23.9977 62.2430   2
   3 -40  -1 86.1047 77.8397   4
  -3 -40   2 216.844 77.4860   2
   3  40   2 166.088 89.8532   5
  -3 -40   3 201.434 75.3540   2
   3  40   3 180.478 92.7797   5
   3  40   4 121.101 73.7827   5
  -3 -40   4 51.8239 52.0925   2
   3  40   5 157.340 85.4700  13
   3 -41   2 7.77739 61.6158   4
   3 -41   1 128.880 85.9354   4
  -3 -41   0-31.0607 50.6503   2
   3 -41   0 8.73242 59.1196   4
  -3 -41   1-49.6188 50.6630   2
   3 -41  -1 42.1281 63.9668   4
  -3 -41   2 31.2702 51.1257   2
   3 -41  -2-27.8241 51.9303   4
  -3 -41   3 427.223 91.1279   2
  -4   0   0 36552.2 637.948   8
  -4   0  -1 9661.27 359.317   8
  -4   0   1 9095.45 285.782  12
  -4   0   1 9776.16 300.293   8
  -4   0  -2 4834.42 265.558   8
  -4   0   2 4913.24 186.837   8
  -4   0   2 4645.08 244.060  12
  -4   0  -3 87110.4 1195.63   8
  -4   0   3 86344.6 654.899   8
  -4   0   4 839.586 181.574  10
  -4   0   4 493.478 76.4240   7
   4   0   4 515.973 84.7948   7
  -4   0  -4 562.876 154.724   8
  -4   0  -5 10730.1 484.329   8
  -4   0   5 11207.1 386.809   7
   4   0   5 10822.6 385.313   7
  -4   0   5 11326.2 532.825  10
  -4   0   6 266.963 74.8742   7
   4   0   6 262.172 80.0473   7
  -4   0  -6 211.589 92.6751   8
  -4   0   6 200.511 94.9396  10
  -4   0  -7 375.847 151.188   8
  -4   0   7 362.138 107.508   7
  -4   0  -8 911.095 178.803   8
  -4   0  -9 217.808 135.902   8
  -4   0 -10 443.534 142.308   8
   4   0  10 423.705 215.675   6
   4   0  10 243.137 120.350   3
  -4   0  10 474.263 225.145   6
  -4   0 -11-65.6298 96.2350   8
   4   0  11 133.948 179.111   6
   4   0  11-6.05834 101.529   3
  -4   0  11 107.475 167.339   6
   4   0  12 331.922 186.251   6
  -4   0  12 806.418 294.131   6
  -4   0  13 371.561 206.795   6
  -4   0  14 261.313 169.825   6
  -4   0  15-108.931 151.009   6
  -4   0  16-87.4457 101.753   6
  -4   0  17 96.3079 76.8931   6
  -4   1  17 218.396 102.473   6
  -4   1  16 354.996 149.015   6
  -4   1  15 49.7264 158.178   6
  -4   1  14 101.744 161.901   6
  -4   1  13 670.784 258.789   6
   4  -1  12 495.085 232.632   6
  -4   1  12 775.152 258.107   6
  -4  -1 -11 198.972 110.316   8
   4  -1  11 381.068 171.390   6
   4  -1  11 300.094 144.061   3
  -4   1  11 522.453 174.812   6
  -4  -1 -10 194.265 130.795   8
   4  -1  10 388.666 233.295   6
   4  -1  10 161.026 102.008   3
  -4   1  10 562.859 231.897   6
  -4  -1  -9 3351.34 349.304   8
  -4  -1  -8 537.657 172.275   8
  -4   1   8 388.075 115.990   7
  -4  -1  -7 3455.56 313.206   8
  -4   1   7 3314.87 262.207   7
  -4  -1  -6 1136.12 170.284   8
  -4   1   6 1108.14 140.525   7
  -4   1   6 1331.21 200.251  10
  -4   1   5 3780.11 228.807   7
  -4   1   5 3824.93 326.121  10
  -4   1   4 29164.3 775.057  10
  -4   1   4 27862.9 772.809  12
  -4   1   3 2166.17 117.002   8
  -4   1   3 1940.60 121.024   7
  -4   1   3 1815.84 184.291  12
  -4  -1  -2 24982.2 606.497   8
  -4   1   2 25546.9 433.784   8
  -4  -1  -1 34544.4 667.532   8
  -4   1   1 34421.0 566.186   8
  -4   1   1 32973.3 573.795  12
  -4  -1   0 10418.2 350.937   8
  -4   1   0 10323.0 342.749   8
  -4   1   0 10920.5 271.060  12
  -4   1  -1 34062.5 663.816   8
  -4  -1   1 34176.2 565.682   8
  -4   1  -2 25858.7 624.616   8
  -4  -1   2 25634.9 416.238   8
  -4   1  -3 2033.98 192.537   8
   4   1   3 1858.96 120.122   7
  -4  -1   3 2076.59 95.8771   8
  -4   1  -4 29756.4 751.066   8
   4   1   4 30340.5 571.903   7
  -4  -1   4 29525.4 785.983  10
  -4   1  -5 3866.38 300.325   8
   4   1   5 3547.69 224.572   7
  -4  -1   5 3978.05 324.803  10
  -4   1  -6 1228.38 185.206   8
   4   1   6 1024.20 140.541   7
  -4  -1   6 1080.92 179.371  10
   4   1   7 3315.56 271.919   7
  -4   1  -7 3499.66 315.276   8
  -4   1  -8 414.913 183.444   8
   4   1   8 657.191 152.833   7
  -4   1  -9 3243.56 324.471   8
   4   1  10 171.213 214.416   6
   4   1  10 107.143 94.0842   3
  -4   1 -10 183.091 116.595   8
  -4  -1  10 449.759 251.997   6
  -4   1 -11 387.781 147.792   8
   4   1  11 398.439 209.134   6
  -4  -1  11 274.800 155.744   6
   4   1  12 518.551 242.984   6
  -4  -1  12 796.143 280.067   6
  -4  -1  13 561.755 235.232   6
  -4  -1  14 91.8247 159.749   6
  -4  -1  15-31.5565 155.826   6
  -4  -1  16 113.095 98.8712   6
  -4  -1  17 103.053 92.9439   6
  -4   2  16 807.935 195.975   6
  -4   2  15 1357.80 261.624   6
  -4   2  14 545.645 212.905   6
  -4   2  13 1194.62 321.838   6
   4  -2  12 823.532 284.603   6
   4  -2  12 412.216 179.161   3
  -4   2  12 798.318 285.226   6
  -4  -2 -11 662.173 176.313   8
   4  -2  11 1139.27 303.101   6
   4  -2  11 653.492 207.456   3
  -4   2  11 935.584 301.732   6
  -4  -2 -10 2135.79 286.955   8
   4  -2  10 1992.85 351.206   6
  -4   2  10 1934.95 334.068   6
   4  -2  10 2189.41 331.351   3
  -4   2   9 1105.74 228.080   7
  -4  -2  -9 950.611 213.543   8
  -4  -2  -8 8116.43 505.002   8
  -4   2   8 8508.48 458.189   7
  -4  -2  -7 1287.12 201.463   8
  -4   2   7 1079.04 152.312   7
  -4   2   6 69.7156 56.5558   7
  -4   2   6-62.6507 111.605  10
  -4   2   5 11620.7 408.409   7
  -4   2   5 11212.6 524.375  10
  -4   2   5 10648.5 537.514  12
  -4   2   4 1970.65 151.290   7
  -4   2   4 1764.66 208.087  12
  -4   2   4 2152.70 229.041  10
  -4   2   3 14073.7 307.476   8
  -4   2   3 13084.5 484.001  12
  -4   2   2 14154.4 334.022   8
  -4   2   2 14496.5 262.376   7
  -4   2   1 18240.8 415.061   8
  -4   2   1 17734.8 453.326  12
  -4  -2   0 7066.49 284.876   8
  -4   2   0 7612.26 261.550  12
  -4  -2   1 18429.3 416.416   8
  -4   2  -1 17561.6 474.521   8
  -4  -2   2 14066.2 309.370   8
   4   2   2 13917.5 251.365   7
  -4   2  -2 14320.5 460.683   8
  -4   2  -3 14461.9 493.439   8
   4   2   3 14693.8 346.523   7
  -4  -2   3 13528.8 220.826   8
  -4   2  -4 1894.73 194.631   8
   4   2   4 1842.75 144.519   7
  -4  -2   4 2095.90 227.269  10
  -4   2  -5 11499.1 496.492   8
   4   2   5 10971.1 403.665   7
  -4  -2   5 11180.1 537.405  10
  -4   2  -6 50.0121 67.9068   8
   4   2   6 66.8852 57.0003   7
  -4  -2   6-79.7019 87.0445  10
  -4   2  -7 1331.12 215.512   8
   4   2   7 1129.36 173.777   7
   4   2   8 8568.98 465.207   7
  -4   2  -8 8065.96 485.631   8
  -4   2  -9 925.809 203.619   8
   4   2   9 2111.14 277.050   7
  -4  -2  10 2269.77 353.884   6
   4   2  10 2277.98 393.278  13
  -4   2 -10 1796.30 253.843   8
   4   2  11 659.892 286.133  13
  -4  -2  11 1306.62 328.179   6
  -4  -2  12 1012.88 285.326   6
  -4  -2  13 1250.95 304.527   6
  -4  -2  14 494.310 189.846   6
  -4  -2  15 1292.32 278.629   6
  -4  -2  16 561.798 165.232   6
  -4  -2  17 105.847 108.138   6
  -4   3  16 61.5428 110.350   6
  -4   3  15 725.671 226.838   6
  -4   3  14 339.923 188.977   6
   4  -3  13 1245.34 295.224   6
  -4   3  13 1595.69 352.543   6
   4  -3  12 2389.14 415.760   6
  -4   3  12 2423.23 397.029   6
   4  -3  12 2094.51 340.044   3
  -4  -3 -11 2089.79 297.231   8
   4  -3  11 2761.55 430.217   6
   4  -3  11 2356.14 380.531   3
  -4   3  11 2697.16 409.082   6
  -4  -3 -10 513.534 174.783   8
  -4   3  10 533.172 145.410   7
   4  -3  10 650.368 234.884   6
   4  -3  10 572.534 204.253   3
  -4   3  10 446.284 198.489   6
  -4  -3  -9 4555.16 399.896   8
  -4   3   9 4497.25 362.212   7
  -4  -3  -8 1255.92 234.756   8
  -4   3   8 1280.84 208.070   7
  -4   3   7 1159.43 159.800   7
  -4   3   6 4394.08 293.078   7
  -4   3   6 3986.37 365.024  12
  -4   3   6 4566.44 356.238  10
  -4   3   5 16550.3 498.403   7
  -4   3   5 15640.8 642.922  12
  -4   3   5 16405.5 640.222  10
  -4   3   4 6129.62 267.184   7
  -4   3   4 5658.62 355.684  12
  -4   3   4 6550.66 374.681  10
  -4   3   3 31271.8 509.431   7
  -4   3   3 30253.1 477.808   8
  -4   3   3 29489.5 756.309  12
  -4   3   2 7608.42 252.028   8
  -4   3   2 7452.65 200.574   7
  -4   3   2 7331.52 349.041  12
  -4   3   1 4368.00 241.789  12
  -4   3   1 4281.69 209.363   8
  -4   3   0 19506.6 475.646   8
  -4   3   0 22732.0 488.287  12
  -4  -3   1 4277.49 206.686   8
  -4   3  -1 4395.84 240.579   8
   4   3   2 7376.44 199.135   7
  -4   3  -2 7383.04 332.138   8
  -4  -3   2 7178.76 227.490   8
  -4   3  -3 30768.2 710.470   8
   4   3   3 30533.6 506.885   7
   4   3   4 5746.00 260.291   7
  -4   3  -4 5941.17 335.077   8
  -4  -3   4 6312.31 373.319  10
  -4   3  -5 16393.2 584.675   8
   4   3   5 16348.5 500.055   7
  -4  -3   5 17428.9 654.547  10
  -4   3  -6 4085.59 309.783   8
   4   3   6 4387.25 291.558   7
  -4  -3   6 4187.93 349.420  10
  -4   3  -7 1273.88 191.214   8
   4   3   7 1102.28 164.652   7
   4   3   8 2005.59 242.967   7
  -4   3  -8 1354.75 218.327   8
  -4   3  -9 4980.33 394.626   8
   4   3   9 4896.86 383.627   7
  -4   3 -10 532.819 148.959   8
   4   3  10 881.507 190.051   7
  -4  -3  10 877.468 268.605   6
   4   3  10 421.215 269.879  13
  -4  -3  11 1792.91 378.681   6
   4   3  11 2293.39 408.698  13
  -4  -3  12 3428.03 469.988   6
  -4  -3  13 1135.29 303.503   6
  -4  -3  14 59.0957 145.177   6
  -4  -3  15 901.703 276.633   6
  -4  -3  16 295.245 154.309   6
  -4  -3  17 363.685 118.844   6
  -4   4  16-24.1322 102.744   6
  -4   4  15 1671.41 302.625   6
  -4   4  14-17.9454 135.296   6
   4  -4  13 2133.27 392.292   6
  -4   4  13 2145.00 375.443   6
   4  -4  12 5096.78 595.734   6
  -4   4  12 4372.17 544.590   6
   4  -4  12 4761.77 529.796   3
  -4   4  11 3433.12 467.728   6
   4  -4  11 3513.61 488.557   6
   4  -4  11 3116.98 433.093   3
  -4  -4 -11 2450.55 321.390   8
  -4  -4 -10 994.918 216.074   8
  -4   4  10 720.926 191.045   7
   4  -4  10 1627.14 341.678   6
  -4   4  10 1472.43 328.999   6
   4  -4  10 1257.75 271.836   3
  -4   4   9 2045.08 265.530   7
  -4  -4  -9 2702.09 323.988   8
  -4   4   8 857.677 165.611   7
  -4   4   7 963.934 152.144   7
  -4   4   6 2928.13 240.363   7
  -4   4   6 2761.19 314.432  12
  -4   4   6 2851.54 288.737  10
  -4   4   5 622.783 106.479   7
  -4   4   5 740.421 155.030  10
  -4   4   5 394.641 128.605  12
  -4   4   4 23187.6 529.709   7
  -4   4   4 22612.8 738.697  12
  -4   4   4 23175.8 692.895  10
  -4   4   3 8783.39 276.412   8
  -4   4   3 9346.03 295.421   7
  -4   4   3 9246.84 435.959  12
  -4   4   2 33769.3 554.942   8
  -4   4   2 35061.6 486.860   7
  -4   4   2 34579.2 781.430  12
  -4   4   1 9489.27 375.194  12
  -4   4   1 9469.56 316.678   8
  -4   4   0 3265.52 201.892   8
  -4   4   0 2731.16 104.898  11
  -4  -4   1 9276.23 305.745   8
  -4   4  -1 9641.93 357.129   8
  -4  -4   2 34039.4 503.690   8
  -4   4  -2 34107.6 710.873   8
   4   4   2 33177.1 465.519   7
  -4   4  -3 8953.12 386.847   8
   4   4   3 9016.21 287.717   7
   4   4   4 22067.7 515.981   7
  -4   4  -4 22830.5 650.503   8
   4   4   5 726.464 118.019   7
  -4   4  -5 707.463 131.197   8
  -4  -4   5 744.491 166.379  10
  -4   4  -6 3089.15 273.699   8
   4   4   6 2990.42 246.821   7
  -4  -4   6 3380.28 308.099  10
   4   4   7 858.826 159.036   7
  -4   4  -7 1021.21 179.759   8
   4   4   8 1080.06 199.795   7
  -4   4  -8 699.415 166.082   8
   4   4   9 3017.58 322.539   7
  -4  -4   9 2645.91 400.917   6
  -4   4  -9 2449.38 290.754   8
   4   4  10 1477.69 234.204   7
  -4   4 -10 1148.56 215.101   8
  -4  -4  10 883.164 276.715   6
   4   4  10 671.481 287.747  13
   4   4  11 3187.75 487.203  13
  -4  -4  11 2408.69 423.116   6
  -4  -4  12 4900.62 580.676   6
  -4  -4  13 1545.95 334.666   6
  -4  -4  14 319.360 197.854   6
  -4  -4  15 1675.42 309.035   6
  -4  -4  16 161.458 142.938   6
  -4  -4  17 67.0133 85.3345   6
  -4   5  15 811.373 219.833   6
  -4   5  14 325.967 171.748   6
   4  -5  13 3373.34 475.635   6
   4  -5  13 3139.98 420.670   3
  -4   5  13 2662.32 389.554   6
   4  -5  12 10439.6 815.887   6
  -4   5  12 10095.5 740.054   6
   4  -5  12 10588.6 764.916   3
  -4  -5 -11 5795.46 492.829   8
  -4   5  11 6046.62 474.066   7
   4  -5  11 6174.01 615.368   6
   4  -5  11 5888.63 567.003   3
  -4   5  11 5503.41 545.612   6
  -4  -5 -10 5678.26 478.667   8
  -4   5  10 6022.21 455.008   7
   4  -5  10 6123.62 599.555   6
  -4   5  10 6068.11 595.107   6
   4  -5  10 6062.64 559.559   3
  -4  -5  -9 6491.77 489.962   8
  -4   5   9 6716.10 457.043   7
   4  -5   9 7835.01 648.254   6
  -4   5   8 7272.05 448.484   7
  -4   5   7 7643.20 418.321   7
  -4   5   7 6730.46 513.461  12
  -4   5   6 10442.1 447.993   7
  -4   5   6 9729.79 568.558  12
  -4   5   6 10139.9 531.096  10
  -4   5   5 260.333 83.9801   7
  -4   5   5 260.765 107.274  10
  -4   5   5 108.647 99.3408  12
  -4   5   4 6412.85 370.260  10
  -4   5   4 6417.04 297.412   7
  -4   5   4 6075.25 395.739  12
  -4   5   3 3086.77 182.224   7
  -4   5   3 2926.71 172.347   8
  -4   5   3 3028.74 266.853  12
  -4   5   2 2342.05 160.889   8
  -4   5   2 2200.22 216.690  12
  -4   5   1 3652.91 202.522   8
  -4   5   1 3464.01 242.609  12
  -4   5   0 3884.29 217.826   8
  -4   5   0 4163.68 148.053  11
  -4   5  -1 3680.29 226.362   8
  -4  -5   2 1846.39 128.898   8
  -4   5  -2 2090.00 181.742   8
  -4   5  -3 3150.47 236.055   8
   4   5   3 3082.54 183.209   7
  -4   5  -4 6052.33 340.337   8
   4   5   4 5913.75 280.791   7
  -4   5  -5 364.812 101.118   8
   4   5   5 395.064 99.3788   7
  -4  -5   5 283.831 106.686  10
  -4   5  -6 10649.2 496.986   8
   4   5   6 10762.4 465.180   7
  -4  -5   6 9645.56 519.369  10
  -4   5  -7 7270.84 435.812   8
   4   5   7 7653.73 424.606   7
   4   5   8 7305.88 449.721   7
  -4   5  -8 6620.67 435.547   8
  -4   5  -9 6401.19 439.256   8
   4   5   9 7026.51 472.573   7
  -4  -5   9 6273.28 560.726   6
  -4   5 -10 6287.97 447.204   8
   4   5  10 6340.66 468.250   7
  -4  -5  10 5018.15 530.158   6
   4   5  10 6540.98 654.343  13
   4   5  11 6468.77 496.872   7
  -4  -5  11 5381.97 580.465   6
   4   5  11 6334.47 663.221  13
   4   5  12 10488.9 846.458  13
  -4  -5  12 8528.22 751.387   6
  -4  -5  13 2577.31 409.198   6
  -4  -5  14 368.798 213.913   6
  -4  -5  15 968.457 271.497   6
  -4  -5  16 388.462 148.803   6
  -4  -5  17 439.491 132.108   6
  -4   6  14 1589.53 290.068   6
   4  -6  13 490.036 252.802   6
  -4   6  13 628.522 215.525   6
   4  -6  13 878.325 259.969   3
   4  -6  12 2175.26 414.227   6
   4  -6  12 2839.15 418.181   3
  -4   6  12 2156.97 368.854   6
  -4   6  11 2406.16 306.721   7
  -4  -6 -11 2256.18 324.921   8
   4  -6  11 2684.66 452.029   6
   4  -6  11 2694.71 401.659   3
  -4   6  11 2577.15 380.965   6
  -4  -6 -10 4412.10 426.658   8
  -4   6  10 4067.42 380.954   7
   4  -6  10 4738.69 536.423   6
  -4   6  10 5575.11 543.907   6
   4  -6  10 4177.63 465.261   3
  -4   6   9 6401.57 453.716   7
   4  -6   9 6875.43 617.417   6
   4  -6   9 6125.83 537.632   3
  -4   6   8 65.7880 88.8679   7
  -4   6   7 5923.42 373.939   7
  -4   6   7 5969.16 487.848  12
  -4   6   6 5264.47 328.656   7
  -4   6   6 5151.06 418.752  12
  -4   6   6 4937.61 377.031  10
  -4   6   5 2355.07 206.382   7
  -4   6   5 2358.22 258.665  10
  -4   6   5 2106.94 262.572  12
  -4   6   4 7830.42 339.640   7
  -4   6   4 7507.37 446.194  12
  -4   6   4 7739.89 406.013  10
  -4   6   3 43389.0 680.150   8
  -4   6   3 44025.7 1013.84  12
  -4   6   2 5244.30 239.395   8
  -4   6   2 5057.94 328.541  12
  -4   6   1 929.460 113.495   8
  -4   6   1 886.709 88.4778  11
  -4   6   0 2078.62 168.727   8
   4   6   0 2026.35 112.878  11
  -4   6  -1 773.590 115.028   8
  -4   6  -2 5204.81 285.491   8
  -4   6  -3 43211.7 846.338   8
  -4   6  -4 7466.60 374.811   8
  -4  -6   4 8187.01 417.756  10
   4   6   4 7753.57 334.373   7
  -4   6  -5 2351.48 225.151   8
   4   6   5 2262.87 200.110   7
  -4  -6   5 2499.22 249.433  10
  -4   6  -6 5316.80 357.355   8
   4   6   6 4989.79 317.332   7
  -4  -6   6 5662.00 397.913  10
  -4   6  -7 6124.07 399.891   8
   4   6   7 5830.66 376.484   7
  -4   6  -8 147.538 100.996   8
   4   6   8 357.989 131.806   7
  -4   6  -9 6384.28 438.131   8
   4   6   9 6541.57 462.271   7
  -4  -6   9 5841.73 572.341   6
  -4   6 -10 4616.30 381.314   8
   4   6  10 4996.14 423.383   7
  -4  -6  10 3813.82 473.912   6
   4   6  10 4835.59 575.683  13
   4   6  11 2562.31 322.057   7
   4   6  11 2771.12 489.515  13
  -4  -6  11 2505.04 428.404   6
   4   6  12 2034.69 422.597  13
  -4  -6  12 1629.35 398.159   6
  -4  -6  13 713.415 254.835   6
  -4  -6  14 1099.97 274.912   6
  -4  -6  15 1778.19 309.371   6
  -4  -6  16 539.102 183.437   6
  -4  -6  17 274.363 116.554   6
  -4   7  14 35.8932 121.784   6
   4  -7  13 979.247 277.398   6
  -4   7  13 1089.43 259.845   6
   4  -7  13 1332.23 300.009   3
   4  -7  12 1116.19 328.731   6
  -4   7  12 1631.95 323.879   6
   4  -7  12 1482.96 309.340   3
  -4  -7 -11 625.899 194.993   8
  -4   7  11 592.654 173.475   7
   4  -7  11 823.064 280.422   6
  -4   7  11 838.725 227.060   6
   4  -7  11 917.959 247.793   3
  -4   7  10 2379.40 291.664   7
   4  -7  10 2739.44 423.181   6
  -4  -7 -10 2683.17 336.904   8
   4  -7  10 2894.81 392.191   3
  -4   7  10 2026.19 325.344   6
  -4   7   9 4007.96 366.545   7
   4  -7   9 4209.85 496.116   6
   4  -7   9 3923.85 435.873   3
  -4   7   8 175.216 92.9253   7
  -4   7   8 301.784 124.756  12
  -4   7   7 463.358 122.345   7
  -4   7   7 420.787 164.791  12
  -4   7   6 8152.81 410.945   7
  -4   7   6 8053.53 527.329  12
  -4   7   6 7377.52 459.174  10
  -4   7   5 61.2008 55.6107   7
  -4   7   5 13.5833 98.1943  12
  -4   7   5 146.594 100.625  10
  -4   7   4 9254.17 510.698  12
  -4   7   4 9138.16 444.674  10
  -4   7   3 2782.95 191.198   8
  -4   7   3 2778.73 268.868  12
  -4   7   2 12379.9 381.453   8
  -4   7   2 12157.0 515.221  12
  -4   7   1 4664.55 241.096   8
  -4   7   1 5372.15 217.424  11
  -4   7   0 554.740 94.3767   8
  -4   7  -1 5274.30 277.236   8
   4   7   1 4890.63 200.692  11
  -4   7  -2 12689.6 446.007   8
  -4   7  -3 2858.74 227.007   8
[truncated: 599,143 more chars]
